# Supplementary material for: Integrator complex subunit 12 knockout overcomes a transcriptional block to HIV latency reversal
Source: bioRxiv preprint, doi:10.1101/2024.08.30.610517, version 4 (2025-02-19)
Supplement: Supplemental File S1 [file 610517_file03.xlsx]

## Sheet: HuEpi_Screen 1_5A8
id	num	neg|score	neg|p-value	neg|fdr	neg|rank	neg|goodsgrna	neg|lfc	pos|score	pos|p-value	pos|fdr	pos|rank	pos|goodsgrna	pos|lfc\	IBET151 + AZD5582 48hr 5A8 -log2 (y)
INTS12	6	0.96007	0.96007	0.999997	1821	0	2.291	1.1946e-12	2.5597e-06	0.00099	1	5	2.291\	39.6066
EZH2	6	0.37233	0.5902	0.999997	1124	1	2.0704	1.0783e-10	2.5597e-06	0.00099	2	5	2.0704\	33.1105
TAF5	6	0.91847	0.92245	0.999997	1750	1	2.1556	2.3154e-09	2.5597e-06	0.00099	3	5	2.1556\	28.6861
ACTL6A	6	0.84558	0.88264	0.999997	1687	1	2.2154	1.1016e-08	2.5597e-06	0.00099	4	5	2.2154\	26.4358
YEATS4	6	0.79574	0.86365	0.999997	1646	1	1.953	1.9045e-08	2.5597e-06	0.00099	5	5	1.953\	25.646
UBE2H	6	0.93497	0.93549	0.999997	1780	1	1.4645	6.8043e-07	7.6792e-06	0.002475	6	5	1.4645\	20.487
BRD2	6	0.94579	0.94571	0.999997	1797	0	1.4407	1.0352e-06	1.2799e-05	0.003536	7	5	1.4407\	19.8817
TAF3	6	0.97661	0.97624	0.999997	1860	0	1.2613	1.6278e-06	1.7918e-05	0.004332	8	4	1.2613\	19.2286
WAC	6	0.99273	0.99228	0.999997	1907	0	1.0311	4.4197e-06	3.3276e-05	0.007151	9	5	1.0311\	17.7876
EED	6	0.99962	0.99957	0.999997	1929	0	1.5177	6.8801e-06	3.8396e-05	0.007235	10	6	1.5177\	17.1491
TRRAP	6	0.99249	0.99201	0.999997	1904	0	1.3147	1.0565e-05	4.3515e-05	0.007235	11	5	1.3147\	16.5303
DPF2	6	0.99999	1	0.999997	1934	0	1.0586	1.1013e-05	4.8635e-05	0.007235	12	6	1.0586\	16.4704
RNF20	6	0.81577	0.87074	0.999997	1656	1	1.0873	1.1608e-05	4.8635e-05	0.007235	13	5	1.0873\	16.3945
ING3	6	0.99859	0.9986	0.999997	1924	0	1.0543	2.065e-05	0.00011519	0.015912	14	6	1.0543\	15.5635
PRPF31	6	0.98546	0.98505	0.999997	1883	0	1.5151	2.5931e-05	0.00016638	0.021452	15	5	1.5151\	15.235
EXOSC7	6	0.99996	0.99997	0.999997	1933	0	1.083	3.7132e-05	0.00026365	0.031159	16	6	1.083\	14.717
ZMYM3	6	0.99996	0.99996	0.999997	1932	0	0.69218	3.8302e-05	0.00027389	0.031159	17	6	0.69218\	14.6722
SRCAP	6	0.97618	0.97577	0.999997	1858	0	1.0117	5.4558e-05	0.00039164	0.042079	18	5	1.0117\	14.1618
TAF10	6	0.97239	0.97208	0.999997	1845	0	1.0133	6.5678e-05	0.00044795	0.043317	19	5	1.0133\	13.8942
CDK2	6	0.99294	0.99251	0.999997	1908	0	1.0141	6.6155e-05	0.00044795	0.043317	20	5	1.0141\	13.8838
KAT8	6	0.92339	0.926	0.999997	1759	1	0.84209	8.5025e-05	0.0005401	0.049741	21	4	0.84209\	13.5218
KAT5	6	0.66253	0.79133	0.999997	1502	1	1.3798	9.1011e-05	0.00060665	0.052303	22	5	1.3798\	13.4236
SENP1	6	0.99856	0.99858	0.999997	1923	0	1.1558	9.6042e-05	0.00062201	0.052303	23	6	1.1558\	13.346
CENPA	6	0.9999	0.99991	0.999997	1931	0	0.7542	0.00010418	0.00067321	0.053663	24	6	0.7542\	13.2286
SETD1A	6	0.98961	0.98922	0.999997	1898	0	0.91509	0.00010642	0.00069368	0.053663	25	5	0.91509\	13.1979
CXXC1	6	0.96177	0.96171	0.999997	1825	0	0.82867	0.00015783	0.0010008	0.074257	26	4	0.82867\	12.6293
MTA2	6	0.99898	0.99899	0.999997	1925	0	0.97155	0.00016529	0.0010367	0.074257	27	6	0.97155\	12.5627
GTF3C4	6	0.99203	0.99145	0.999997	1901	0	0.87875	0.0002871	0.0017483	0.120757	28	5	0.87875\	11.7662
UBE2D3	6	0.72587	0.83575	0.999997	1587	1	0.66612	0.00031102	0.0018814	0.125469	29	5	0.66612\	11.6507
EP400	6	0.99963	0.99958	0.999997	1930	0	1.0176	0.00037244	0.00225	0.14505	30	6	1.0176\	11.3907
MGEA5	6	0.9995	0.99948	0.999997	1928	0	0.55771	0.00049565	0.002895	0.180613	31	6	0.55771\	10.9784
ASH2L	6	0.99945	0.99944	0.999997	1927	0	0.91637	0.00054688	0.0031101	0.185269	32	6	0.91637\	10.8365
KANSL2	6	0.9977	0.99769	0.999997	1922	0	0.825	0.00055725	0.0031613	0.185269	33	6	0.825\	10.8094
EXOSC9	6	0.64591	0.78002	0.999997	1474	1	0.86172	0.00058019	0.0032739	0.186226	34	5	0.86172\	10.7512
TAF4	6	0.18071	0.37999	0.999997	731	1	0.92143	0.00063278	0.0035299	0.19505	35	4	0.92143\	10.626
PRMT5	6	0.24377	0.45208	0.999997	860	1	1.136	0.00070408	0.0039138	0.208322	36	5	1.136\	10.472
TAF6	6	0.10204	0.25226	0.98132	487	1	0.86319	0.00072161	0.0039855	0.208322	37	5	0.86319\	10.4365
TLE4	6	0.026949	0.093151	0.882013	198	3	-0.26872	0.00077461	0.004221	0.213633	38	2	-0.26872\	10.3342
PRMT1	6	0.98916	0.98874	0.999997	1896	0	0.81807	0.0007974	0.004308	0.213633	39	4	0.81807\	10.2924
SMARCB1	6	0.37128	0.58919	0.999997	1119	1	0.80992	0.00086185	0.0046152	0.217468	40	4	0.80992\	10.1803
TAF7	6	0.99912	0.99911	0.999997	1926	0	0.61341	0.00087698	0.004692	0.217468	41	6	0.61341\	10.1552
CTCF	6	0.98029	0.98013	0.999997	1866	0	0.74232	0.00088371	0.0047227	0.217468	42	5	0.74232\	10.1441
PPP2CA	6	0.86833	0.89286	0.999997	1698	1	0.71446	0.0011409	0.0059616	0.268133	43	4	0.71446\	9.77561
KANSL1	6	0.95436	0.95415	0.999997	1809	0	0.95917	0.0012784	0.0066271	0.274031	44	5	0.95917\	9.61144
PRDM16	6	0.24582	0.45441	0.999997	866	2	0.14908	0.0012907	0.0066885	0.274031	45	3	0.14908\	9.59763
WDR77	6	0.71279	0.82631	0.999997	1568	1	1.0762	0.0012937	0.0066988	0.274031	46	5	1.0762\	9.59428
PHF3	6	0.98197	0.98172	0.999997	1871	0	0.79183	0.0012953	0.006709	0.274031	47	5	0.79183\	9.5925
CENPC	6	0.83333	0.87764	0.999997	1673	1	0.48089	0.0013235	0.0068012	0.274031	48	3	0.48089\	9.56143
BRPF3	6	0.82552	0.87442	0.999997	1666	1	0.64721	0.0014704	0.0075179	0.296727	49	5	0.64721\	9.40958
EXOSC4	6	0.96173	0.96168	0.999997	1824	0	0.97593	0.0015711	0.0080452	0.311188	50	5	0.97593\	9.31401
INO80C	6	0.98316	0.98296	0.999997	1874	0	0.73576	0.0016684	0.0085674	0.324888	51	4	0.73576\	9.22732
HEATR1	14	0.4541	0.76621	0.999997	1260	2	0.32938	0.001704	0.012791	0.431291	52	7	0.32938\	9.19686
BPTF	6	0.7359	0.84278	0.999997	1603	1	0.93965	0.0020657	0.010503	0.389221	53	5	0.93965\	8.91915
KMT2D	6	0.99732	0.99735	0.999997	1920	0	0.97657	0.0021077	0.010666	0.389221	54	6	0.97657\	8.89011
HIST1H1A	6	0.77468	0.85677	0.999997	1631	1	0.53708	0.0022551	0.011363	0.406949	55	5	0.53708\	8.79259
DAXX	6	0.99769	0.99769	0.999997	1921	0	0.52515	0.0023084	0.011619	0.407267	56	6	0.52515\	8.75889
ZNHIT1	6	0.0023223	0.01167	0.696408	32	1	0.64836	0.0023528	0.011793	0.407267	57	5	0.64836\	8.73141
DNMT1	6	0.72552	0.83546	0.999997	1585	1	0.79941	0.002594	0.012934	0.431291	58	4	0.79941\	8.59061
INO80E	6	0.58113	0.73789	0.999997	1388	2	0.086751	0.0027603	0.013738	0.450327	59	3	0.086751\	8.50096
NTC_new_155	6	0.44685	0.6569	0.999997	1249	1	0.66928	0.0029878	0.014828	0.470135	61	5	0.66928\	8.3867
NTC_new_644	6	0.83678	0.87898	0.999997	1680	1	0.68628	0.0029878	0.014828	0.470135	60	5	0.68628\	8.3867
TP53BP1	6	0.99683	0.99666	0.999997	1919	0	0.70947	0.003169	0.015612	0.482956	62	6	0.70947\	8.30176
NTC_new_980	6	0.99674	0.99659	0.999997	1918	0	0.79968	0.0032576	0.016021	0.482956	63	6	0.79968\	8.26197
MAX	6	0.9913	0.99079	0.999997	1900	0	0.67896	0.003353	0.016497	0.482956	64	5	0.67896\	8.22033
MINA	6	0.2966	0.51035	0.999997	982	2	0.41534	0.0033628	0.016533	0.482956	65	4	0.41534\	8.21612
DDX21	6	0.75839	0.85209	0.999997	1624	1	0.47165	0.0034374	0.016922	0.482956	66	4	0.47165\	8.18447
TAF12	6	0.99656	0.9964	0.999997	1917	0	0.40423	0.0034432	0.016943	0.482956	67	6	0.40423\	8.18203
MBD1	6	0.99652	0.99636	0.999997	1916	0	0.40486	0.0034846	0.01705	0.482956	68	6	0.40486\	8.16479
SMYD1	6	0.99645	0.99628	0.999997	1915	0	0.34873	0.0035499	0.017373	0.482956	69	6	0.34873\	8.13801
SKP1	6	0.98035	0.9802	0.999997	1867	0	0.50791	0.0035677	0.01748	0.482956	70	5	0.50791\	8.13079
MASTL	6	0.74973	0.84965	0.999997	1617	1	0.59952	0.0039414	0.019318	0.526217	71	4	0.59952\	7.98708
UBE2T	6	0.99548	0.99523	0.999997	1914	0	0.60037	0.0045234	0.021811	0.585877	72	6	0.60037\	7.78838
PBK	6	0.71895	0.83067	0.999997	1579	2	0.76824	0.0046462	0.022369	0.592635	73	4	0.76824\	7.74973
TLK2	6	0.92272	0.92551	0.999997	1755	1	0.77068	0.004797	0.023071	0.602957	74	5	0.77068\	7.70365
MBD2	6	0.99498	0.99465	0.999997	1913	0	0.56	0.0050218	0.024084	0.617397	75	6	0.56\	7.63758
PHF1	6	0.2101	0.41412	0.999997	794	2	0.61441	0.0051429	0.02452	0.617397	76	4	0.61441\	7.6032
EXOSC5	6	0.98444	0.98414	0.999997	1880	0	0.52462	0.0051617	0.024581	0.617397	77	3	0.52462\	7.59794
NTC_new_537	6	0.97562	0.97532	0.999997	1856	0	0.4546	0.0054395	0.025769	0.630843	78	4	0.4546\	7.52231
NTC_new_867	6	0.71602	0.82855	0.999997	1573	2	0.53787	0.0054395	0.025769	0.630843	79	4	0.53787\	7.52231
SUV39H1	6	0.77183	0.85588	0.999997	1630	1	0.57858	0.0057485	0.027115	0.655507	80	5	0.57858\	7.4426
NTC_new_438	6	0.99409	0.99367	0.999997	1912	0	0.24257	0.0059082	0.027765	0.655764	81	6	0.24257\	7.40307
NTC_new_582	6	0.48985	0.68209	0.999997	1295	1	0.36694	0.0060125	0.028216	0.655764	82	3	0.36694\	7.37782
TDRD7	6	0.20874	0.41253	0.999997	791	1	0.53452	0.0060214	0.028252	0.655764	83	5	0.53452\	7.37569
WHSC1L1	6	0.9939	0.99349	0.999997	1911	0	0.48189	0.0060973	0.028482	0.655764	84	6	0.48189\	7.35761
NTC_new_1067	6	0.085386	0.21968	0.948362	444	1	0.59301	0.0063745	0.029567	0.672743	85	4	0.59301\	7.29347
HIST1H4J	6	0.031341	0.10609	0.882013	228	2	0.64915	0.0066039	0.030351	0.67469	86	4	0.64915\	7.24247
HIST1H4K	6	0.031341	0.10609	0.882013	229	2	0.64915	0.0066039	0.030351	0.67469	87	4	0.64915\	7.24247
NTC_new_443	6	0.98518	0.98484	0.999997	1882	0	0.37273	0.0069932	0.0316	0.680363	88	5	0.37273\	7.15983
MBD4	6	0.098731	0.24578	0.98132	479	2	0.076018	0.0069997	0.03161	0.680363	89	3	0.076018\	7.15849
NTC_new_928	6	0.014122	0.053101	0.732989	117	3	0.08144	0.0070143	0.031661	0.680363	90	3	0.08144\	7.15549
PHF8	6	0.9927	0.99225	0.999997	1906	0	0.55667	0.0074401	0.033146	0.704439	91	5	0.55667\	7.07046
USP15	6	0.3931	0.61195	0.999997	1173	2	0.676	0.007558	0.033576	0.705822	92	4	0.676\	7.04778
NTC_new_455	6	0.20127	0.40378	0.999997	771	2	0.45086	0.0084941	0.036857	0.742056	93	4	0.45086\	6.87932
SUZ12	6	0.79423	0.86318	0.999997	1644	1	0.75318	0.0086784	0.037456	0.742056	94	5	0.75318\	6.84836
TAF8	6	0.95989	0.95984	0.999997	1818	0	0.56442	0.0086907	0.037497	0.742056	95	5	0.56442\	6.84631
HMGN1	6	0.65355	0.78514	0.999997	1488	2	0.37105	0.0087164	0.037543	0.742056	96	3	0.37105\	6.84205
SCML4	6	0.53315	0.70828	0.999997	1341	2	0.61569	0.0087965	0.037758	0.742056	97	4	0.61569\	6.82885
CHD1	6	0.12077	0.28711	0.986369	554	1	0.49326	0.0089014	0.03806	0.742056	98	5	0.49326\	6.81175
MOV10	6	0.072847	0.19476	0.934661	402	1	0.46576	0.008939	0.038163	0.742056	99	5	0.46576\	6.80567
RCOR3	6	0.98959	0.98915	0.999997	1897	0	0.36924	0.0091798	0.038895	0.742056	100	5	0.36924\	6.76732
POLR2D	6	0.15067	0.34055	0.987568	661	3	0.078321	0.0093144	0.039351	0.742056	101	3	0.078321\	6.74632
HIST2H2AA3	6	0.74439	0.84806	0.999997	1614	1	0.69349	0.0094374	0.039765	0.742056	102	4	0.69349\	6.72739
HIST2H2AA4	6	0.74439	0.84806	0.999997	1615	1	0.69349	0.0094374	0.039765	0.742056	103	4	0.69349\	6.72739
APOBEC3F	6	0.37058	0.5886	0.999997	1118	2	-0.015913	0.0095186	0.040047	0.742056	104	2	-0.015913\	6.71503
HIRA	6	0.98552	0.98508	0.999997	1884	0	0.45917	0.0096095	0.040287	0.742056	105	5	0.45917\	6.70132
TLE1	6	0.85881	0.88824	0.999997	1694	1	0.428	0.0099733	0.04147	0.75391	106	5	0.428\	6.64771
MPHOSPH8	6	0.1344	0.31181	0.986369	602	3	-0.25437	0.010031	0.041711	0.75391	107	2	-0.25437\	6.63939
NTC_new_358	6	0.7816	0.85901	0.999997	1635	1	0.36938	0.010361	0.042724	0.765081	108	5	0.36938\	6.59269
NTC_new_376	6	0.29929	0.51327	0.999997	987	2	0.12105	0.010895	0.044572	0.783663	110	3	0.12105\	6.52019
NTC_new_718	6	0.40757	0.62656	0.999997	1197	3	-0.12568	0.010895	0.044572	0.783663	109	2	-0.12568\	6.52019
NTC_new_697	6	0.81816	0.87151	0.999997	1660	1	0.51117	0.011082	0.045146	0.786594	111	5	0.51117\	6.49564
NTC_new_173	6	0.2589	0.46915	0.999997	893	2	0.56922	0.011436	0.046308	0.786962	112	4	0.56922\	6.45027
AURKB	6	0.66725	0.79474	0.999997	1507	2	0.47821	0.011567	0.046717	0.786962	113	3	0.47821\	6.43384
DMAP1	6	0.98363	0.98338	0.999997	1877	0	0.58818	0.011651	0.046943	0.786962	114	4	0.58818\	6.4234
SP100	6	0.9801	0.97996	0.999997	1863	0	0.47756	0.011888	0.047731	0.786962	115	5	0.47756\	6.39435
ZMYND8	6	0.5312	0.70708	0.999997	1336	2	0.36506	0.012078	0.048315	0.786962	116	3	0.36506\	6.37147
NTC_new_969	6	0.69867	0.81599	0.999997	1545	2	0.56879	0.012109	0.048412	0.786962	117	4	0.56879\	6.36778
NTC_new_985	6	0.57357	0.73323	0.999997	1380	2	0.39314	0.012109	0.048412	0.786962	118	4	0.39314\	6.36778
NTC_new_162	6	0.93396	0.93455	0.999997	1777	1	0.54648	0.012116	0.048422	0.786962	119	5	0.54648\	6.36694
SATB2	6	0.66774	0.79517	0.999997	1508	2	0.032787	0.012391	0.049267	0.7879	120	2	0.032787\	6.33456
DR1	6	0.9669	0.96669	0.999997	1832	0	0.37441	0.012444	0.049415	0.7879	121	5	0.37441\	6.32841
SYNCRIP	6	0.66524	0.79328	0.999997	1505	1	0.64676	0.012527	0.049702	0.7879	122	4	0.64676\	6.31882
KDM4A	6	0.15455	0.34716	0.989288	676	2	0.011884	0.012666	0.050163	0.788739	123	2	0.011884\	6.3029
HIST1H4H	6	0.76388	0.85354	0.999997	1625	1	0.40249	0.013036	0.05132	0.799819	124	5	0.40249\	6.26135
GATAD1	6	0.9528	0.95255	0.999997	1806	0	0.47997	0.013205	0.051862	0.799819	125	5	0.47997\	6.24277
HINFP	6	0.98667	0.98623	0.999997	1885	0	0.61055	0.013289	0.052108	0.799819	126	5	0.61055\	6.23362
NTC_new_1005	6	0.86151	0.88957	0.999997	1696	1	0.32	0.013598	0.053188	0.80028	127	5	0.32\	6.20046
SF3B3	6	0.3379	0.55492	0.999997	1056	3	-0.36142	0.013722	0.053629	0.80028	128	2	-0.36142\	6.18737
WHSC1	6	0.97039	0.97002	0.999997	1838	0	0.57164	0.013745	0.053695	0.80028	129	4	0.57164\	6.18495
HIST1H2BH	6	0.78877	0.86147	0.999997	1642	1	0.45584	0.013895	0.054192	0.80028	130	5	0.45584\	6.16929
MUM1	6	0.98973	0.98934	0.999997	1899	0	0.48585	0.013906	0.054207	0.80028	131	4	0.48585\	6.16815
RNF40	6	0.29119	0.50428	0.999997	968	1	0.48598	0.014304	0.055518	0.813419	132	5	0.48598\	6.12744
NTC_new_206	6	0.56883	0.73025	0.999997	1377	1	0.53355	0.01453	0.056281	0.81425	133	5	0.53355\	6.10482
ARID1A	6	0.74134	0.84699	0.999997	1611	2	0.49888	0.014816	0.057269	0.81425	134	4	0.49888\	6.0767
NTC_new_1033	6	0.83989	0.8803	0.999997	1683	1	0.46221	0.01499	0.057811	0.81425	135	5	0.46221\	6.05986
EXOSC3	6	0.37583	0.59399	0.999997	1137	1	0.6376	0.015019	0.057893	0.81425	136	4	0.6376\	6.05707
ACTR6	6	0.98442	0.98413	0.999997	1879	0	0.62674	0.015092	0.058108	0.81425	137	5	0.62674\	6.05007
PHF5A	6	0.8902	0.90404	0.999997	1717	1	0.83422	0.015142	0.058236	0.81425	138	4	0.83422\	6.0453
NTC_new_814	6	0.55322	0.7206	0.999997	1363	2	0.30819	0.015236	0.058564	0.81425	139	3	0.30819\	6.03637
BRCA1	6	0.63749	0.77428	0.999997	1462	2	0.56358	0.01534	0.058943	0.81425	140	4	0.56358\	6.02656
NTC_new_293	6	0.085386	0.21968	0.948362	442	1	0.42835	0.016002	0.061129	0.831845	142	5	0.42835\	5.9656
NTC_new_45	6	0.94658	0.94638	0.999997	1800	0	0.45906	0.016002	0.061129	0.831845	141	5	0.45906\	5.9656
NAP1L4	6	0.3058	0.52017	0.999997	1000	2	0.017201	0.016162	0.061605	0.831845	143	1	0.017201\	5.95125
NTC_new_1014	6	0.70062	0.81737	0.999997	1553	1	0.63836	0.016346	0.062301	0.831845	144	4	0.63836\	5.93492
KDM3A	6	0.97536	0.97506	0.999997	1854	0	0.44573	0.016508	0.062833	0.831845	145	5	0.44573\	5.92069
MTA3	6	0.11891	0.28387	0.986369	547	1	0.59044	0.016628	0.063248	0.831845	146	5	0.59044\	5.91024
PHF21A	6	0.42598	0.64431	0.999997	1230	2	0.21625	0.016724	0.063571	0.831845	147	4	0.21625\	5.90194
NTC_new_1029	6	0.73946	0.84565	0.999997	1607	1	0.5005	0.017039	0.064523	0.831845	148	4	0.5005\	5.87502
NTC_new_199	6	0.53715	0.71069	0.999997	1343	2	0.58359	0.017043	0.064533	0.831845	149	4	0.58359\	5.87468
NTC_new_745	6	0.81816	0.87151	0.999997	1657	1	0.44559	0.017043	0.064533	0.831845	150	3	0.44559\	5.87468
WSB2	6	0.12087	0.28736	0.986369	555	3	-0.13011	0.017277	0.065209	0.831845	151	3	-0.13011\	5.855
NTC_new_237	6	0.33775	0.55479	0.999997	1054	1	0.29596	0.017481	0.065808	0.831845	152	5	0.29596\	5.83807
NTC_new_878	6	0.75216	0.85041	0.999997	1619	1	0.38605	0.017481	0.065808	0.831845	153	5	0.38605\	5.83807
MSL2	6	0.47795	0.67498	0.999997	1284	1	0.47959	0.018162	0.067902	0.836758	154	5	0.47959\	5.78293
EXOSC2	6	0.98047	0.9803	0.999997	1868	0	0.66087	0.018199	0.067999	0.836758	155	5	0.66087\	5.78
JMJD6	6	0.47885	0.67549	0.999997	1286	2	0.17641	0.018243	0.068127	0.836758	156	3	0.17641\	5.77651
VPS72	6	0.99352	0.99304	0.999997	1909	0	0.53696	0.018301	0.06826	0.836758	157	5	0.53696\	5.77193
BRD7	6	0.78636	0.86049	0.999997	1640	1	0.55876	0.01841	0.068639	0.836758	158	5	0.55876\	5.76337
NTC_new_882	6	0.95537	0.95533	0.999997	1810	0	0.53139	0.018458	0.068792	0.836758	159	4	0.53139\	5.75961
NTC_new_639	6	0.267	0.47804	0.999997	921	1	0.46014	0.018994	0.070518	0.850224	160	5	0.46014\	5.71831
RUVBL1	6	0.79616	0.86377	0.999997	1647	1	0.83703	0.019079	0.070779	0.850224	161	4	0.83703\	5.71187
PHIP	6	0.37198	0.58989	0.999997	1122	1	0.44954	0.019433	0.071992	0.859461	162	5	0.44954\	5.68535
NTC_new_29	6	0.56883	0.73025	0.999997	1379	1	0.28034	0.019741	0.072955	0.865608	163	5	0.28034\	5.66266
NTC_new_294	6	0.27367	0.48514	0.999997	930	3	0.2782	0.020084	0.074091	0.873732	164	3	0.2782\	5.63781
NCL	6	0.24173	0.44981	0.999997	857	2	0.10612	0.020331	0.074823	0.87606	165	2	0.10612\	5.62018
BRWD1	6	0.83506	0.87833	0.999997	1675	1	0.34483	0.020545	0.075468	0.87606	166	5	0.34483\	5.60507
FAM175B	6	0.39068	0.60944	0.999997	1168	1	0.31216	0.020616	0.075647	0.87606	167	5	0.31216\	5.60009
NTC_new_831	6	0.66075	0.7902	0.999997	1497	1	0.41609	0.021117	0.077183	0.888525	168	5	0.41609\	5.56545
H2AFZ	6	0.95783	0.95779	0.999997	1814	0	0.6819	0.021369	0.077951	0.890594	169	5	0.6819\	5.54834
IKZF1	6	0.97252	0.97217	0.999997	1846	0	0.4983	0.021456	0.078284	0.890594	170	4	0.4983\	5.54248
CBX5	6	0.61214	0.75772	0.999997	1430	2	0.41918	0.021755	0.079205	0.892384	171	4	0.41918\	5.52251
SMARCC1	6	0.90775	0.91482	0.999997	1735	1	0.22694	0.021808	0.079364	0.892384	172	4	0.22694\	5.519
RPS6KA4	6	0.24022	0.44787	0.999997	852	3	0.095173	0.022348	0.080982	0.903019	173	3	0.095173\	5.48371
EHMT1	6	0.39507	0.61406	0.999997	1174	3	0.22442	0.022534	0.08154	0.903019	174	3	0.22442\	5.47175
SS18L2	6	0.7775	0.85765	0.999997	1633	1	0.69884	0.022907	0.082743	0.903019	175	4	0.69884\	5.44807
BCOR	6	0.27395	0.48544	0.999997	938	1	0.40998	0.023068	0.083152	0.903019	176	5	0.40998\	5.43796
HDGFRP3	6	0.96641	0.96629	0.999997	1831	0	0.23885	0.023146	0.083352	0.903019	177	5	0.23885\	5.43309
NTC_new_1083	6	0.62939	0.76895	0.999997	1453	1	0.45713	0.023618	0.084678	0.903019	179	4	0.45713\	5.40397
NTC_new_520	6	0.1453	0.331	0.986369	637	1	0.53107	0.023618	0.084678	0.903019	180	4	0.53107\	5.40397
NTC_new_678	6	0.12223	0.28994	0.986369	558	2	0.57076	0.023618	0.084678	0.903019	181	4	0.57076\	5.40397
NTC_new_795	6	0.70062	0.81737	0.999997	1552	2	0.4764	0.023618	0.084678	0.903019	178	4	0.4764\	5.40397
PRMT8	6	0.20236	0.4051	0.999997	781	3	-0.059492	0.023782	0.085216	0.903019	182	2	-0.059492\	5.39399
USP7	6	0.51497	0.69722	0.999997	1322	1	0.46533	0.023843	0.085446	0.903019	183	4	0.46533\	5.39029
NTC_new_164	6	0.97003	0.96977	0.999997	1836	0	0.39701	0.024154	0.086388	0.908012	184	4	0.39701\	5.37159
NTC_new_230	6	0.96899	0.96877	0.999997	1834	0	0.44445	0.025401	0.089854	0.911176	185	4	0.44445\	5.29897
NTC_new_276	6	0.70634	0.82153	0.999997	1558	1	0.28771	0.025401	0.089854	0.911176	186	3	0.28771\	5.29897
NTC_new_858	6	0.43507	0.6498	0.999997	1240	2	0.37632	0.025401	0.089854	0.911176	187	3	0.37632\	5.29897
NTC_new_593	6	0.52921	0.70588	0.999997	1333	1	0.46521	0.025449	0.089972	0.911176	188	5	0.46521\	5.29625
NTC_new_819	6	0.092875	0.23406	0.97443	463	2	0.43518	0.025449	0.089972	0.911176	189	4	0.43518\	5.29625
NTC_new_1046	6	0.2214	0.4267	0.999997	814	1	0.42841	0.025454	0.089987	0.911176	191	5	0.42841\	5.29596
NTC_new_550	6	0.97138	0.97103	0.999997	1840	0	0.2856	0.025454	0.089987	0.911176	190	5	0.2856\	5.29596
BAZ2B	6	0.93277	0.93369	0.999997	1773	1	0.55241	0.025744	0.090698	0.913598	192	4	0.55241\	5.27962
CUL1	6	0.45186	0.6598	0.999997	1258	2	0.10866	0.025934	0.091297	0.914103	193	3	0.10866\	5.26901
ATAD2B	6	0.65118	0.78365	0.999997	1482	2	0.42371	0.026385	0.092521	0.914103	194	3	0.42371\	5.24414
ELP5	6	0.39668	0.61565	0.999997	1178	2	0.37892	0.026815	0.093688	0.914103	195	3	0.37892\	5.22082
NTC_new_28	6	0.93104	0.93221	0.999997	1766	1	0.24049	0.027077	0.094359	0.914103	196	5	0.24049\	5.20679
NTC_new_270	6	0.69172	0.81131	0.999997	1532	1	0.37433	0.027108	0.094446	0.914103	197	4	0.37433\	5.20514
HIST1H3C	6	0.72815	0.83734	0.999997	1591	1	0.057615	0.02732	0.095091	0.914103	198	2	0.057615\	5.1939
PADI4	6	0.52032	0.70042	0.999997	1327	2	-0.014852	0.027476	0.095557	0.914103	199	2	-0.014852\	5.18568
NTC_new_558	6	0.71633	0.82879	0.999997	1577	1	0.49887	0.027495	0.095639	0.914103	200	5	0.49887\	5.18469
NTC_new_667	6	0.18545	0.3854	0.999997	736	2	0.33091	0.027495	0.095639	0.914103	202	3	0.33091\	5.18469
NTC_new_841	6	0.56803	0.72975	0.999997	1372	2	0.27024	0.027495	0.095639	0.914103	201	3	0.27024\	5.18469
KDM6A	6	0.2887	0.50159	0.999997	965	3	0.01998	0.027671	0.096176	0.914103	203	3	0.01998\	5.17548
NTC_new_143	6	0.58522	0.74025	0.999997	1393	1	0.29759	0.027947	0.096893	0.914103	204	5	0.29759\	5.16116
NTC_new_832	6	0.83678	0.87898	0.999997	1681	1	0.25669	0.027947	0.096893	0.914103	205	5	0.25669\	5.16116
ASH1L	6	0.31409	0.52908	0.999997	1015	2	0.033151	0.02833	0.097999	0.92001	206	2	0.033151\	5.14153
PCGF5	6	0.17632	0.37489	0.999997	721	3	0.040696	0.028657	0.098941	0.92001	207	3	0.040696\	5.12497
ENY2	6	0.46458	0.66708	0.999997	1268	2	0.48756	0.028801	0.09934	0.92001	208	4	0.48756\	5.11774
STK31	6	0.11994	0.28571	0.986369	552	3	-0.15902	0.028834	0.099422	0.92001	209	1	-0.15902\	5.11609
NTC_new_708	6	0.47437	0.67291	0.999997	1278	2	0.3919	0.029355	0.10096	0.922721	210	4	0.3919\	5.09025
NTC_new_803	6	0.75625	0.85155	0.999997	1622	1	0.46686	0.029355	0.10096	0.922721	211	5	0.46686\	5.09025
NTC_new_424	6	0.52739	0.70476	0.999997	1330	2	0.20821	0.029578	0.10162	0.922721	212	3	0.20821\	5.07933
NTC_new_673	6	0.83678	0.87898	0.999997	1677	1	0.34287	0.029578	0.10162	0.922721	213	4	0.34287\	5.07933
DDB2	6	0.27277	0.48418	0.999997	927	2	-0.046643	0.029842	0.10234	0.924887	214	1	-0.046643\	5.06651
NTC_new_1028	6	0.91196	0.91754	0.999997	1738	1	0.42342	0.030746	0.10498	0.935755	215	5	0.42342\	5.02346
MLLT1	6	0.35676	0.57418	0.999997	1092	2	0.42163	0.03082	0.10516	0.935755	216	4	0.42163\	5.01999
NTC_new_117	6	0.20651	0.40996	0.999997	790	2	0.093574	0.031238	0.10651	0.935755	217	3	0.093574\	5.00055
NTC_new_513	6	0.1453	0.331	0.986369	639	2	-0.061215	0.031238	0.10651	0.935755	218	2	-0.061215\	5.00055
NTC_new_758	6	0.10964	0.26635	0.98132	524	2	0.29623	0.031238	0.10651	0.935755	219	4	0.29623\	5.00055
HELLS	6	0.98769	0.98728	0.999997	1892	0	0.30208	0.031327	0.10674	0.935755	220	5	0.30208\	4.99645
HIST1H2AI	6	0.73179	0.84001	0.999997	1596	1	0.28413	0.031457	0.10713	0.935755	221	5	0.28413\	4.99048
USP12	6	0.64307	0.77815	0.999997	1471	1	0.35281	0.031555	0.10741	0.935755	222	5	0.35281\	4.98599
NTC_new_561	6	0.014122	0.053101	0.732989	127	1	0.22353	0.032081	0.10885	0.943991	223	5	0.22353\	4.96214
KDM2A	6	0.58963	0.74279	0.999997	1396	2	0.53393	0.032481	0.11011	0.948229	224	4	0.53393\	4.94426
APOBEC3H	6	0.3224	0.53807	0.999997	1028	1	0.24904	0.032547	0.11032	0.948229	225	5	0.24904\	4.94133
SMN2	6	0.76442	0.85368	0.999997	1628	1	0.26417	0.033476	0.11325	0.961832	226	5	0.26417\	4.90073
CSRP2BP	6	0.98433	0.984	0.999997	1878	0	0.43338	0.033836	0.11429	0.961832	227	5	0.43338\	4.8853
HDAC1	6	0.93824	0.9385	0.999997	1784	1	0.45265	0.033905	0.11449	0.961832	228	5	0.45265\	4.88236
NTC_new_116	6	0.037734	0.12261	0.882013	264	3	0.20487	0.034041	0.11488	0.961832	231	3	0.20487\	4.87658
NTC_new_41	6	0.70696	0.82196	0.999997	1561	2	0.33934	0.034041	0.11488	0.961832	230	3	0.33934\	4.87658
NTC_new_434	6	0.267	0.47804	0.999997	913	1	0.4515	0.034041	0.11488	0.961832	229	4	0.4515\	4.87658
NTC_new_506	6	0.98472	0.98437	0.999997	1881	0	0.17457	0.034477	0.11619	0.967255	232	5	0.17457\	4.85822
A1CF	6	0.9029	0.91165	0.999997	1728	1	0.24709	0.035163	0.11795	0.967255	233	5	0.24709\	4.8298
NTC_new_228	6	0.0456	0.13955	0.882013	294	2	-0.084957	0.035421	0.11871	0.967255	236	2	-0.084957\	4.81925
NTC_new_318	6	0.23548	0.44255	0.999997	847	3	0.046143	0.035421	0.11871	0.967255	234	3	0.046143\	4.81925
NTC_new_437	6	0.12223	0.28994	0.986369	560	3	0.13391	0.035421	0.11871	0.967255	235	3	0.13391\	4.81925
NTC_new_23	6	0.31225	0.5271	0.999997	1005	1	0.36038	0.035554	0.11913	0.967255	238	5	0.36038\	4.81384
NTC_new_552	6	0.61095	0.75698	0.999997	1427	1	0.21718	0.035554	0.11913	0.967255	237	5	0.21718\	4.81384
NTC_new_224	6	0.71633	0.82879	0.999997	1575	1	0.35371	0.035935	0.12035	0.967255	240	4	0.35371\	4.79847
NTC_new_957	6	0.62939	0.76895	0.999997	1454	1	0.44182	0.035935	0.12035	0.967255	239	4	0.44182\	4.79847
SFPQ	6	0.67244	0.79834	0.999997	1513	1	0.42508	0.036237	0.12122	0.967255	241	5	0.42508\	4.78639
KANSL3	6	0.79032	0.86197	0.999997	1643	1	0.23464	0.036383	0.1216	0.967255	242	5	0.23464\	4.78059
ATAT1	6	0.030345	0.10311	0.882013	222	4	-0.35744	0.036872	0.12301	0.967255	243	2	-0.35744\	4.76133
SUV39H2	6	0.91574	0.92051	0.999997	1746	1	0.14751	0.037067	0.12362	0.967255	244	4	0.14751\	4.75372
NSL1	6	0.10251	0.25317	0.98132	488	2	0.34313	0.037137	0.12379	0.967255	245	3	0.34313\	4.751
SFMBT1	6	0.79725	0.86412	0.999997	1648	1	0.46891	0.037199	0.12397	0.967255	246	4	0.46891\	4.74859
HIST1H4E	6	0.82958	0.87608	0.999997	1668	1	0.53578	0.037289	0.1242	0.967255	247	5	0.53578\	4.74511
NTC_new_1077	6	0.51029	0.69443	0.999997	1315	1	0.24831	0.037336	0.12435	0.967255	248	5	0.24831\	4.74329
TAF1	6	0.3845	0.60301	0.999997	1156	2	0.44409	0.037405	0.12453	0.967255	249	4	0.44409\	4.74063
ALKBH1	6	0.6554	0.78638	0.999997	1491	2	0.022746	0.037873	0.1258	0.973056	250	2	0.022746\	4.72269
NTC_new_620	6	0.85331	0.88593	0.999997	1691	1	0.31271	0.038441	0.12726	0.973056	251	5	0.31271\	4.70121
NTC_new_638	6	0.83678	0.87898	0.999997	1678	1	0.2969	0.038441	0.12726	0.973056	252	5	0.2969\	4.70121
SMARCD1	6	0.49543	0.68541	0.999997	1301	2	0.54299	0.038455	0.12729	0.973056	253	4	0.54299\	4.70068
CTR9	6	0.98739	0.98701	0.999997	1889	0	0.5821	0.039373	0.12991	0.985498	254	4	0.5821\	4.66665
AICDA	6	0.1203	0.28632	0.986369	553	1	0.49179	0.039384	0.12994	0.985498	255	4	0.49179\	4.66625
NTC_new_106	6	0.33775	0.55479	0.999997	1053	1	0.43927	0.04102	0.13463	0.997647	256	5	0.43927\	4.60753
NTC_new_623	6	0.98702	0.98662	0.999997	1887	0	0.2184	0.04102	0.13463	0.997647	257	5	0.2184\	4.60753
NTC_new_2	6	0.74728	0.8489	0.999997	1616	1	0.36983	0.041215	0.1352	0.997647	259	4	0.36983\	4.60069
NTC_new_750	6	0.87677	0.89685	0.999997	1708	1	0.3961	0.041215	0.1352	0.997647	258	4	0.3961\	4.60069
NTC_new_1091	6	0.17083	0.36831	0.999021	714	3	-0.14083	0.041375	0.13567	0.997647	261	2	-0.14083\	4.5951
NTC_new_281	6	0.56017	0.72489	0.999997	1368	1	0.31164	0.041375	0.13567	0.997647	262	4	0.31164\	4.5951
NTC_new_30	6	0.2132	0.41763	0.999997	799	2	0.087173	0.041375	0.13567	0.997647	263	3	0.087173\	4.5951
NTC_new_710	6	0.31863	0.53405	0.999997	1018	3	-0.12568	0.041375	0.13567	0.997647	260	2	-0.12568\	4.5951
RPL23A	6	0.93222	0.93318	0.999997	1770	1	0.49112	0.041659	0.13653	0.999834	264	5	0.49112\	4.58523
ADNP	6	0.029842	0.10158	0.882013	219	2	-0.028803	0.042864	0.13981	0.999834	265	1	-0.028803\	4.54409
NTC_new_487	6	0.87677	0.89685	0.999997	1706	1	0.38032	0.043051	0.1403	0.999834	266	4	0.38032\	4.53781
NTC_new_525	6	0.85084	0.88488	0.999997	1690	1	0.35373	0.043392	0.14121	0.999834	267	5	0.35373\	4.52643
NTC_new_629	6	0.98246	0.9822	0.999997	1872	0	0.20934	0.043392	0.14121	0.999834	268	5	0.20934\	4.52643
ASXL1	6	0.32607	0.54199	0.999997	1036	3	-0.14135	0.04386	0.14242	0.999834	269	2	-0.14135\	4.51095
PRDM11	6	0.53256	0.70787	0.999997	1339	2	0.14221	0.044357	0.14382	0.999834	270	3	0.14221\	4.49469
DPPA3	6	0.98747	0.98708	0.999997	1890	0	0.45182	0.044434	0.14405	0.999834	271	4	0.45182\	4.49219
FBL	6	0.53388	0.70877	0.999997	1342	1	0.71663	0.044761	0.14491	0.999834	272	4	0.71663\	4.48161
APOBEC3G	6	0.40535	0.6243	0.999997	1191	3	-0.068331	0.044855	0.14513	0.999834	273	1	-0.068331\	4.47859
NTC_new_943	6	0.95913	0.95908	0.999997	1815	0	0.18359	0.045264	0.14626	0.999834	274	5	0.18359\	4.46549
NTC_new_180	6	0.014122	0.053101	0.732989	118	2	0.27407	0.045311	0.14639	0.999834	275	3	0.27407\	4.46399
NTC_new_392	6	0.25334	0.46291	0.999997	884	2	0.27576	0.045311	0.14639	0.999834	276	3	0.27576\	4.46399
NTC_new_653	6	0.55561	0.72197	0.999997	1365	2	0.21677	0.045311	0.14639	0.999834	278	3	0.21677\	4.46399
NTC_new_787	6	0.064326	0.17755	0.898904	381	2	0.35455	0.045311	0.14639	0.999834	277	4	0.35455\	4.46399
SMNDC1	6	0.74989	0.84971	0.999997	1618	1	0.53694	0.045352	0.14651	0.999834	279	4	0.53694\	4.46269
CDK1	6	0.7188	0.83052	0.999997	1578	2	0.21239	0.045635	0.14721	0.999834	280	3	0.21239\	4.45372
POLE3	6	0.74231	0.84749	0.999997	1612	1	0.31201	0.045735	0.14749	0.999834	281	5	0.31201\	4.45056
HCFC1	6	0.9925	0.99201	0.999997	1905	0	0.40451	0.045951	0.14807	0.999834	282	5	0.40451\	4.44376
USP21	6	0.65152	0.78393	0.999997	1483	2	0.012036	0.046119	0.1485	0.999834	283	2	0.012036\	4.43849
NTC_new_616	6	0.65259	0.78457	0.999997	1486	1	0.22706	0.046777	0.15046	0.999834	285	5	0.22706\	4.41806
NTC_new_859	6	0.33775	0.55479	0.999997	1055	1	0.17069	0.046777	0.15046	0.999834	284	5	0.17069\	4.41806
SET	6	0.22721	0.43331	0.999997	825	2	0.11095	0.047338	0.15205	0.999834	286	3	0.11095\	4.40086
NTC_new_972	6	0.17502	0.37318	0.999997	719	3	0.12893	0.047535	0.15254	0.999834	287	3	0.12893\	4.39487
WDR5	6	0.98836	0.98796	0.999997	1894	0	0.42586	0.047925	0.15362	0.999834	288	5	0.42586\	4.38308
CHAF1A	6	0.98816	0.9878	0.999997	1893	0	0.46902	0.048101	0.15408	0.999834	289	5	0.46902\	4.37779
NTC_new_47	6	0.096616	0.24163	0.979689	476	3	0.096898	0.048383	0.15476	0.999834	291	3	0.096898\	4.36936
NTC_new_493	6	0.052351	0.15362	0.897595	329	4	-0.30446	0.048383	0.15476	0.999834	292	2	-0.30446\	4.36936
NTC_new_611	6	0.56883	0.73025	0.999997	1378	2	0.047975	0.048383	0.15476	0.999834	290	3	0.047975\	4.36936
CBX3	6	0.37373	0.59172	0.999997	1132	1	0.28852	0.048417	0.15487	0.999834	293	5	0.28852\	4.36834
MCM2	14	0.1661	0.44423	0.999997	706	4	0.237	0.04887	0.20113	0.999834	294	8	0.237\	4.35491
NTC_new_19	6	0.97077	0.97038	0.999997	1839	0	0.39704	0.049422	0.15757	0.999834	295	4	0.39704\	4.3387
NTC_new_466	6	0.64821	0.78163	0.999997	1478	2	0.3975	0.049422	0.15757	0.999834	297	4	0.3975\	4.3387
NTC_new_51	6	0.603	0.75166	0.999997	1417	2	0.43651	0.049422	0.15757	0.999834	298	4	0.43651\	4.3387
NTC_new_559	6	0.34665	0.56409	0.999997	1074	2	0.45377	0.049422	0.15757	0.999834	296	4	0.45377\	4.3387
NTC_new_160	6	0.96368	0.96375	0.999997	1828	0	0.27388	0.049869	0.15868	0.999834	299	5	0.27388\	4.32571
NTC_new_203	6	0.1532	0.34486	0.989288	674	3	0.14	0.050076	0.15926	0.999834	301	3	0.14\	4.31974
NTC_new_214	6	0.96368	0.96375	0.999997	1827	0	0.24873	0.050076	0.15926	0.999834	300	3	0.24873\	4.31974
CUL2	6	0.95993	0.95988	0.999997	1819	0	0.22626	0.050746	0.16103	0.999834	302	5	0.22626\	4.30056
BRD9	6	0.99235	0.99183	0.999997	1902	0	0.32557	0.051635	0.16353	0.999834	303	5	0.32557\	4.27551
CUL3	6	0.98018	0.98002	0.999997	1864	0	0.39076	0.051712	0.16368	0.999834	304	4	0.39076\	4.27336
NTC_new_1057	6	0.90927	0.91585	0.999997	1736	1	0.25055	0.052529	0.16582	0.999834	307	4	0.25055\	4.25074
NTC_new_675	6	0.31863	0.53405	0.999997	1019	2	0.065528	0.052529	0.16582	0.999834	308	3	0.065528\	4.25074
NTC_new_845	6	0.58465	0.7399	0.999997	1390	2	-0.035541	0.052529	0.16582	0.999834	305	2	-0.035541\	4.25074
NTC_new_886	6	0.69867	0.81599	0.999997	1543	2	0.2575	0.052529	0.16582	0.999834	306	4	0.2575\	4.25074
NTC_new_386	6	0.54747	0.71717	0.999997	1356	2	0.3259	0.052642	0.1661	0.999834	309	4	0.3259\	4.24764
NTC_new_1016	6	0.50348	0.69013	0.999997	1312	2	0.35901	0.053566	0.1686	0.999834	310	4	0.35901\	4.22254
NTC_new_31	6	0.94792	0.94764	0.999997	1801	0	0.22815	0.053833	0.16923	0.999834	311	5	0.22815\	4.21537
NTC_new_784	6	0.16194	0.35792	0.989288	697	1	0.24958	0.053833	0.16923	0.999834	312	5	0.24958\	4.21537
PRKCB	6	0.9936	0.9931	0.999997	1910	0	0.22079	0.054613	0.17142	0.999834	313	5	0.22079\	4.19461
DAPK3	6	0.97737	0.97698	0.999997	1861	0	0.36961	0.054952	0.17227	0.999834	314	4	0.36961\	4.18568
RNF17	6	0.8126	0.86954	0.999997	1654	1	0.24795	0.054957	0.17229	0.999834	315	5	0.24795\	4.18555
JMJD4	6	0.059876	0.16881	0.898904	358	3	-0.21616	0.055248	0.17303	0.999834	316	2	-0.21616\	4.17793
BANP	6	0.81285	0.86961	0.999997	1655	1	0.31215	0.055551	0.1738	0.999834	317	5	0.31215\	4.17004
NTC_new_768	6	0.7117	0.82545	0.999997	1566	2	0.31065	0.055759	0.17426	0.999834	318	4	0.31065\	4.16465
NTC_new_915	6	0.96899	0.96877	0.999997	1833	0	0.30593	0.055759	0.17426	0.999834	319	4	0.30593\	4.16465
JDP2	6	0.99236	0.99184	0.999997	1903	0	0.27482	0.056049	0.17501	0.999834	320	5	0.27482\	4.15717
TAF9	6	0.60753	0.75489	0.999997	1423	1	0.20585	0.056233	0.17548	0.999834	321	3	0.20585\	4.15244
TLE2	6	0.58834	0.742	0.999997	1394	2	0.21911	0.056725	0.17644	0.999834	322	4	0.21911\	4.13987
CIR1	6	0.38519	0.60376	0.999997	1158	2	0.46992	0.057033	0.17701	0.999834	323	4	0.46992\	4.13206
CLNS1A	6	0.97344	0.97315	0.999997	1848	0	0.24841	0.057217	0.17736	0.999834	324	4	0.24841\	4.12741
SMARCD2	6	0.54871	0.71791	0.999997	1357	1	0.0206	0.0582	0.17901	0.999834	325	2	0.0206\	4.10284
RPA3	6	0.89012	0.90401	0.999997	1716	1	0.40372	0.058692	0.17999	0.999834	326	3	0.40372\	4.09069
NTC_new_104	6	0.13901	0.31975	0.986369	617	2	0.35252	0.058905	0.18038	0.999834	327	4	0.35252\	4.08547
NTC_new_71	6	0.267	0.47804	0.999997	918	1	0.26526	0.058905	0.18038	0.999834	328	3	0.26526\	4.08547
GFI1	6	0.36317	0.58101	0.999997	1102	1	0.19723	0.060164	0.18281	0.999834	329	3	0.19723\	4.05496
MORF4L2	6	0.21044	0.41449	0.999997	795	2	0.40023	0.060253	0.18297	0.999834	330	4	0.40023\	4.05282
USP44	6	0.94556	0.94552	0.999997	1796	1	0.32261	0.060341	0.18314	0.999834	331	4	0.32261\	4.05072
EP300	6	0.38897	0.60775	0.999997	1165	1	-0.002225	0.060655	0.18369	0.999834	332	2	-0.002225\	4.04323
TAF2	6	0.94204	0.94194	0.999997	1788	1	0.42044	0.061186	0.18466	0.999834	333	4	0.42044\	4.03065
PRKAA1	6	0.025805	0.08992	0.882013	192	1	0.41728	0.061373	0.18499	0.999834	334	4	0.41728\	4.02625
SMARCA5	6	0.83017	0.8763	0.999997	1670	1	0.35612	0.061678	0.1856	0.999834	335	3	0.35612\	4.0191
HIST2H2BF	6	0.42035	0.63955	0.999997	1226	2	0.39095	0.062633	0.18726	0.999834	336	4	0.39095\	3.99693
UBR7	6	0.22809	0.4343	0.999997	826	2	0.40418	0.063333	0.18863	0.999834	337	4	0.40418\	3.9809
ELP4	6	0.7356	0.84257	0.999997	1602	2	0.60261	0.063396	0.18873	0.999834	338	4	0.60261\	3.97946
NTC_new_303	6	0.018661	0.067968	0.815701	161	3	0.081168	0.063846	0.18958	0.999834	339	3	0.081168\	3.96926
SUPT3H	6	0.47614	0.67389	0.999997	1282	1	0.4064	0.065397	0.19235	0.999834	340	4	0.4064\	3.93463
SIRT7	6	0.62422	0.76544	0.999997	1444	2	0.34276	0.065541	0.19265	0.999834	341	4	0.34276\	3.93146
ARID4B	6	0.20313	0.40602	0.999997	782	3	0.040688	0.065827	0.19311	0.999834	342	3	0.040688\	3.92518
H2AFY	6	0.13936	0.32039	0.986369	622	3	0.12515	0.065966	0.1934	0.999834	343	3	0.12515\	3.92213
KDM1A	6	0.28778	0.50061	0.999997	964	2	0.39616	0.066226	0.1939	0.999834	344	4	0.39616\	3.91646
HIST1H2BN	6	0.33586	0.55286	0.999997	1048	2	0.38357	0.06657	0.19464	0.999834	345	4	0.38357\	3.90898
PRM1	6	0.17521	0.37344	0.999997	720	2	0.30255	0.066643	0.19476	0.999834	346	4	0.30255\	3.9074
NTC_new_195	6	0.1453	0.331	0.986369	645	4	-0.12326	0.067499	0.19644	0.999834	358	2	-0.12326\	3.88899
NTC_new_387	6	0.57671	0.73515	0.999997	1383	2	0.038299	0.067499	0.19644	0.999834	359	3	0.038299\	3.88899
NTC_new_430	6	0.93561	0.93607	0.999997	1781	1	0.043057	0.067499	0.19644	0.999834	360	3	0.043057\	3.88899
NTC_new_482	6	0.014122	0.053101	0.732989	123	3	-0.13114	0.067499	0.19644	0.999834	356	2	-0.13114\	3.88899
NTC_new_540	6	0.27996	0.49212	0.999997	944	3	0.013276	0.067499	0.19644	0.999834	349	3	0.013276\	3.88899
NTC_new_599	6	0.37243	0.59034	0.999997	1130	3	-0.021248	0.067499	0.19644	0.999834	353	2	-0.021248\	3.88899
NTC_new_683	6	0.20877	0.41258	0.999997	793	3	-0.1472	0.067499	0.19644	0.999834	355	2	-0.1472\	3.88899
NTC_new_690	6	0.20877	0.41258	0.999997	792	3	-0.16563	0.067499	0.19644	0.999834	351	1	-0.16563\	3.88899
NTC_new_779	6	0.17301	0.37091	0.999997	718	2	0.13818	0.067499	0.19644	0.999834	354	4	0.13818\	3.88899
NTC_new_794	6	0.70062	0.81737	0.999997	1551	1	0.13236	0.067499	0.19644	0.999834	352	3	0.13236\	3.88899
NTC_new_846	6	0.064326	0.17755	0.898904	370	3	-0.13863	0.067499	0.19644	0.999834	350	2	-0.13863\	3.88899
NTC_new_887	6	0.71633	0.82879	0.999997	1574	1	0.053902	0.067499	0.19644	0.999834	347	3	0.053902\	3.88899
NTC_new_912	6	0.6881	0.80896	0.999997	1530	2	0.098913	0.067499	0.19644	0.999834	348	3	0.098913\	3.88899
NTC_new_932	6	0.87074	0.89389	0.999997	1701	1	0.18866	0.067499	0.19644	0.999834	357	4	0.18866\	3.88899
NTC_new_182	6	0.33775	0.55479	0.999997	1052	1	-0.05287	0.068354	0.19809	0.999834	362	2	-0.05287\	3.87083
NTC_new_265	6	0.1532	0.34486	0.989288	673	3	-0.024121	0.068354	0.19809	0.999834	363	3	-0.024121\	3.87083
NTC_new_843	6	0.056202	0.16164	0.898904	343	4	-0.29138	0.068354	0.19809	0.999834	361	2	-0.29138\	3.87083
FOXP2	6	0.03587	0.11854	0.882013	257	3	0.15624	0.068478	0.19833	0.999834	364	3	0.15624\	3.86822
NTC_new_165	6	0.0456	0.13955	0.882013	305	2	0.30125	0.070197	0.20161	0.999834	366	4	0.30125\	3.83245
NTC_new_635	6	0.92442	0.92682	0.999997	1760	1	0.29277	0.070197	0.20161	0.999834	365	4	0.29277\	3.83245
NTC_new_721	6	0.28301	0.4954	0.999997	952	1	0.30125	0.070197	0.20161	0.999834	367	4	0.30125\	3.83245
PDP1	6	0.44774	0.65743	0.999997	1254	2	0.34437	0.071038	0.20323	0.999834	368	4	0.34437\	3.81527
PRKAG2	6	0.94029	0.94036	0.999997	1785	1	0.38269	0.071984	0.20496	0.999834	369	4	0.38269\	3.79618
NTC_new_1037	6	0.1091	0.26539	0.98132	517	2	0.053196	0.072791	0.20634	0.999834	374	3	0.053196\	3.7801
NTC_new_140	6	0.55322	0.7206	0.999997	1360	1	0.20222	0.072791	0.20634	0.999834	373	4	0.20222\	3.7801
NTC_new_336	6	0.87677	0.89685	0.999997	1709	1	0.030689	0.072791	0.20634	0.999834	372	2	0.030689\	3.7801
NTC_new_44	6	0.2132	0.41763	0.999997	798	2	0.18352	0.072791	0.20634	0.999834	370	4	0.18352\	3.7801
NTC_new_77	6	0.53723	0.71075	0.999997	1348	2	0.25281	0.072791	0.20634	0.999834	371	3	0.25281\	3.7801
MRGBP	6	0.64175	0.77716	0.999997	1470	1	0.54035	0.072832	0.20644	0.999834	375	4	0.54035\	3.77928
NTC_new_519	6	0.6815	0.80461	0.999997	1524	1	0.33675	0.073378	0.20743	0.999834	376	4	0.33675\	3.76851
H3F3A	6	0.68586	0.80733	0.999997	1529	1	0.46663	0.073556	0.20781	0.999834	377	4	0.46663\	3.76501
CHD2	6	0.47915	0.67561	0.999997	1287	2	0.20095	0.073816	0.2083	0.999834	378	3	0.20095\	3.75992
HDAC2	6	0.68546	0.80711	0.999997	1527	2	0.21753	0.074102	0.20885	0.999834	379	3	0.21753\	3.75434
ZBTB7C	6	0.035843	0.11846	0.882013	256	3	-0.3193	0.074301	0.20924	0.999834	380	1	-0.3193\	3.75047
DEK	6	0.70967	0.82399	0.999997	1563	2	0.32325	0.074785	0.21008	0.999834	381	4	0.32325\	3.74111
RNF8	6	0.36952	0.5875	0.999997	1117	2	0.36693	0.075269	0.21101	0.999834	382	4	0.36693\	3.7318
NTC_new_260	6	0.014122	0.053101	0.732989	113	2	0.21728	0.075338	0.21118	0.999834	383	3	0.21728\	3.73048
NTC_new_522	6	0.0456	0.13955	0.882013	299	3	0.14164	0.075338	0.21118	0.999834	384	3	0.14164\	3.73048
NTC_new_20	6	0.1453	0.331	0.986369	649	2	0.30717	0.075893	0.21226	0.999834	386	4	0.30717\	3.71989
NTC_new_588	6	0.57357	0.73323	0.999997	1381	2	0.29655	0.075893	0.21226	0.999834	387	4	0.29655\	3.71989
NTC_new_836	6	0.46012	0.66464	0.999997	1267	2	0.29133	0.075893	0.21226	0.999834	385	4	0.29133\	3.71989
UIMC1	6	0.10393	0.2559	0.98132	496	2	0.39825	0.077049	0.21458	0.999834	388	4	0.39825\	3.69808
NTC_new_147	6	0.73328	0.84098	0.999997	1597	2	0.067855	0.077182	0.21482	0.999834	392	3	0.067855\	3.69559
NTC_new_469	6	0.057722	0.16462	0.898904	348	4	-0.2753	0.077182	0.21482	0.999834	393	2	-0.2753\	3.69559
NTC_new_495	6	0.9538	0.95356	0.999997	1808	0	0.071285	0.077182	0.21482	0.999834	394	3	0.071285\	3.69559
NTC_new_607	6	0.71602	0.82855	0.999997	1572	2	0.11933	0.077182	0.21482	0.999834	390	3	0.11933\	3.69559
NTC_new_668	6	0.96124	0.96122	0.999997	1823	0	0.18791	0.077182	0.21482	0.999834	389	3	0.18791\	3.69559
NTC_new_744	6	0.31899	0.5344	0.999997	1021	3	0.02268	0.077182	0.21482	0.999834	391	3	0.02268\	3.69559
NTC_new_805	6	0.18899	0.38945	0.999997	743	1	0.20801	0.077182	0.21482	0.999834	395	4	0.20801\	3.69559
UHRF2	6	0.079583	0.2081	0.940953	425	3	-0.076816	0.077203	0.21483	0.999834	396	3	-0.076816\	3.6952
HDAC7	6	0.91288	0.91829	0.999997	1739	1	0.32986	0.078536	0.21704	0.999834	397	4	0.32986\	3.6705
PRDM5	6	0.40163	0.62079	0.999997	1188	3	0.17112	0.079394	0.21863	0.999834	398	3	0.17112\	3.65483
BRD8	6	0.48571	0.67953	0.999997	1292	2	0.039039	0.079616	0.21909	0.999834	399	3	0.039039\	3.6508
TYW5	6	0.66327	0.7918	0.999997	1503	2	0.32312	0.08023	0.22041	0.999834	400	4	0.32312\	3.63971
KAT2B	6	0.37443	0.59243	0.999997	1133	2	0.40777	0.080527	0.22099	0.999834	401	4	0.40777\	3.63438
NSD1	6	0.65658	0.78721	0.999997	1493	2	0.28021	0.080602	0.22112	0.999834	402	4	0.28021\	3.63304
HIST1H2BF	6	0.30427	0.51857	0.999997	993	2	0.34022	0.080913	0.22166	0.999834	403	3	0.34022\	3.62748
DPF3	6	0.39543	0.61444	0.999997	1175	3	0.1341	0.081009	0.22187	0.999834	404	3	0.1341\	3.62577
HIST1H3B	6	0.67284	0.79868	0.999997	1515	2	0.29902	0.081049	0.22197	0.999834	405	4	0.29902\	3.62506
RAD54B	6	0.20207	0.40477	0.999997	779	3	-0.15736	0.081061	0.22199	0.999834	406	1	-0.15736\	3.62485
PPARGC1A	6	0.31114	0.52594	0.999997	1002	2	0.22957	0.0812	0.22223	0.999834	407	3	0.22957\	3.62238
MAZ	6	0.035493	0.11764	0.882013	255	4	-0.3335	0.082024	0.22377	0.999834	408	2	-0.3335\	3.60781
MEAF6	6	0.26936	0.48072	0.999997	926	3	0.14649	0.082159	0.22403	0.999834	409	3	0.14649\	3.60544
NTC_new_421	6	0.41998	0.63917	0.999997	1219	1	0.26477	0.082474	0.22464	0.999834	411	4	0.26477\	3.59992
NTC_new_436	6	0.10261	0.25335	0.98132	491	2	0.27991	0.082474	0.22464	0.999834	410	4	0.27991\	3.59992
HIST1H2AB	6	0.02732	0.094221	0.882013	200	3	-0.25929	0.082985	0.22559	0.999834	412	2	-0.25929\	3.59101
CIT	6	0.037373	0.12184	0.882013	262	1	0.33971	0.083535	0.22665	0.999834	413	4	0.33971\	3.58148
NTC_new_676	6	0.92887	0.9304	0.999997	1765	1	0.29619	0.083609	0.22676	0.999834	414	4	0.29619\	3.5802
NTC_new_74	6	0.49136	0.68303	0.999997	1299	2	0.21969	0.083609	0.22676	0.999834	415	3	0.21969\	3.5802
HMG20B	6	0.78693	0.86074	0.999997	1641	1	0.29526	0.083946	0.22738	0.999834	416	4	0.29526\	3.57439
TEX10	6	0.72517	0.83526	0.999997	1584	1	0.50007	0.085218	0.22981	0.999834	417	4	0.50007\	3.5527
NTC_new_650	6	0.27996	0.49212	0.999997	945	3	-0.15842	0.085321	0.22996	0.999834	419	2	-0.15842\	3.55096
NTC_new_75	6	0.12678	0.29826	0.986369	580	2	0.15126	0.085321	0.22996	0.999834	420	3	0.15126\	3.55096
NTC_new_861	6	0.47437	0.67291	0.999997	1279	2	0.2783	0.085321	0.22996	0.999834	418	4	0.2783\	3.55096
NTC_new_927	6	0.35659	0.57397	0.999997	1091	3	0.11223	0.085321	0.22996	0.999834	422	3	0.11223\	3.55096
NTC_new_993	6	0.94658	0.94638	0.999997	1798	0	0.21294	0.085321	0.22996	0.999834	421	4	0.21294\	3.55096
APOBEC1	6	0.70941	0.82378	0.999997	1562	2	0.037163	0.087781	0.23446	0.999834	423	2	0.037163\	3.50995
USP22	6	0.072201	0.19347	0.932503	399	3	-0.02739	0.088337	0.2354	0.999834	424	3	-0.02739\	3.50084
NTC_new_447	6	0.23739	0.44469	0.999997	851	2	0.29019	0.088451	0.2356	0.999834	426	4	0.29019\	3.49898
NTC_new_924	6	0.8883	0.90302	0.999997	1714	1	0.31004	0.088451	0.2356	0.999834	425	4	0.31004\	3.49898
MCRS1	6	0.1044	0.2567	0.98132	497	2	0.089313	0.089693	0.23779	0.999834	427	2	0.089313\	3.47886
ASXL3	6	0.53217	0.70764	0.999997	1338	2	0.31338	0.090715	0.23958	0.999834	428	4	0.31338\	3.46252
NTC_new_515	6	0.25334	0.46291	0.999997	886	1	0.12003	0.091299	0.24068	0.999834	429	4	0.12003\	3.45326
NTC_new_80	6	0.23548	0.44255	0.999997	848	3	-0.10815	0.091299	0.24068	0.999834	430	2	-0.10815\	3.45326
HIST1H1E	6	0.88646	0.90191	0.999997	1713	1	0.31395	0.091356	0.2408	0.999834	431	4	0.31395\	3.45236
RRP8	6	0.32128	0.53695	0.999997	1025	2	0.067462	0.092555	0.24304	0.999834	432	3	0.067462\	3.43355
NTC_new_553	6	0.29929	0.51327	0.999997	986	1	0.25506	0.092689	0.24329	0.999834	433	4	0.25506\	3.43146
NTC_new_545	6	0.41998	0.63917	0.999997	1220	2	0.27975	0.093096	0.24406	0.999834	434	3	0.27975\	3.42514
NTC_new_592	6	0.029551	0.10077	0.882013	213	3	-0.0016429	0.093096	0.24406	0.999834	435	3	-0.0016429\	3.42514
FXR2	6	0.24163	0.44968	0.999997	856	3	-0.099902	0.093508	0.24482	0.999834	436	2	-0.099902\	3.41877
MDC1	6	0.98324	0.98305	0.999997	1875	0	0.3825	0.094435	0.24665	0.999834	437	4	0.3825\	3.40453
HMG20A	6	0.69498	0.8135	0.999997	1537	2	0.25995	0.094539	0.24681	0.999834	438	3	0.25995\	3.40295
ACTR8	6	0.072361	0.19383	0.932503	401	3	-0.068681	0.094935	0.24766	0.999834	439	2	-0.068681\	3.39692
MBD3	6	0.78349	0.8596	0.999997	1638	1	0.27744	0.095348	0.24839	0.999834	440	4	0.27744\	3.39065
ANKRD32	6	0.44051	0.65302	0.999997	1243	1	0.066525	0.095885	0.24933	0.999834	441	2	0.066525\	3.38255
HIST1H1C	6	0.77927	0.85824	0.999997	1634	1	0.30631	0.09636	0.25029	0.999834	442	4	0.30631\	3.37542
NTC_new_48	6	0.44685	0.6569	0.999997	1252	2	0.23071	0.09641	0.25038	0.999834	444	3	0.23071\	3.37467
NTC_new_504	6	0.71602	0.82855	0.999997	1571	2	0.21715	0.09641	0.25038	0.999834	443	3	0.21715\	3.37467
NTC_new_103	6	0.27367	0.48514	0.999997	929	3	-0.046217	0.096536	0.25058	0.999834	445	3	-0.046217\	3.37279
NTC_new_320	6	0.97452	0.97431	0.999997	1852	0	0.18491	0.096536	0.25058	0.999834	450	3	0.18491\	3.37279
NTC_new_351	6	0.11504	0.27681	0.986369	533	3	-0.10298	0.096536	0.25058	0.999834	448	3	-0.10298\	3.37279
NTC_new_669	6	0.95094	0.95067	0.999997	1803	0	0.15471	0.096536	0.25058	0.999834	446	3	0.15471\	3.37279
NTC_new_770	6	0.11717	0.28073	0.986369	540	4	-0.21925	0.096536	0.25058	0.999834	451	2	-0.21925\	3.37279
NTC_new_865	6	0.36833	0.58629	0.999997	1115	3	0.037083	0.096536	0.25058	0.999834	447	3	0.037083\	3.37279
NTC_new_960	6	0.66075	0.7902	0.999997	1495	1	0.10886	0.096536	0.25058	0.999834	449	3	0.10886\	3.37279
INO80D	6	0.35497	0.57245	0.999997	1086	1	0.28742	0.097091	0.25161	0.999834	452	4	0.28742\	3.36452
APOBEC2	6	0.61607	0.76017	0.999997	1434	2	0.23594	0.097667	0.25283	0.999834	453	3	0.23594\	3.35599
OGT	6	0.026242	0.091149	0.882013	193	5	-0.42989	0.097783	0.25303	0.999834	454	1	-0.42989\	3.35427
NTC_new_154	6	0.34665	0.56409	0.999997	1075	2	0.26563	0.098726	0.25469	0.999834	456	4	0.26563\	3.34043
NTC_new_389	6	0.16194	0.35792	0.989288	699	2	0.28077	0.098726	0.25469	0.999834	457	4	0.28077\	3.34043
NTC_new_449	6	0.61095	0.75698	0.999997	1424	2	0.2473	0.098726	0.25469	0.999834	455	4	0.2473\	3.34043
NTC_new_741	6	0.95208	0.95183	0.999997	1805	0	0.24431	0.098726	0.25469	0.999834	458	4	0.24431\	3.34043
SMEK2	6	0.59732	0.74777	0.999997	1404	2	0.25317	0.098731	0.25472	0.999834	459	3	0.25317\	3.34035
NTC_new_235	6	0.40957	0.62863	0.999997	1202	2	0.19254	0.099198	0.25548	0.999834	461	3	0.19254\	3.33355
NTC_new_855	6	0.95537	0.95533	0.999997	1811	0	0.35023	0.099198	0.25548	0.999834	460	4	0.35023\	3.33355
HIST1H2BO	6	0.98765	0.98726	0.999997	1891	0	0.27764	0.10016	0.25723	0.999834	462	4	0.27764\	3.31962
HIST2H2AC	6	0.91429	0.91932	0.999997	1743	1	0.40869	0.10021	0.2573	0.999834	463	4	0.40869\	3.3189
HIST1H2AE	6	0.9815	0.98122	0.999997	1870	0	0.22183	0.10062	0.25816	0.999834	464	4	0.22183\	3.31301
SAP18	6	0.66343	0.79192	0.999997	1504	2	0.66569	0.1008	0.25852	0.999834	465	4	0.66569\	3.31043
AEBP2	6	0.71413	0.82723	0.999997	1569	2	0.32038	0.10127	0.25939	0.999834	466	3	0.32038\	3.30372
CHD9	6	0.36388	0.5818	0.999997	1103	1	0.30594	0.10138	0.25967	0.999834	467	4	0.30594\	3.30216
TTF2	6	0.72713	0.83665	0.999997	1590	2	0.4627	0.1014	0.25974	0.999834	468	4	0.4627\	3.30187
PRKAG3	6	0.38236	0.60068	0.999997	1152	2	0.3151	0.10157	0.25997	0.999834	469	4	0.3151\	3.29945
PARP3	6	0.024794	0.087156	0.882013	189	2	0.26048	0.10226	0.26123	0.999834	470	4	0.26048\	3.28969
NBN	6	0.77647	0.85731	0.999997	1632	1	0.26291	0.10235	0.2614	0.999834	471	4	0.26291\	3.28842
SAP30L	6	0.41073	0.62969	0.999997	1204	2	0.10304	0.10251	0.2617	0.999834	472	3	0.10304\	3.28616
RNF2	6	0.61125	0.75718	0.999997	1428	2	0.1176	0.10277	0.26216	0.999834	473	3	0.1176\	3.28251
HIST1H2BM	6	0.60634	0.75403	0.999997	1419	2	0.30785	0.10304	0.26261	0.999834	474	4	0.30785\	3.27872
ELP2	6	0.93629	0.93675	0.999997	1782	1	0.18314	0.1031	0.26272	0.999834	475	4	0.18314\	3.27788
EYA1	6	0.60386	0.75234	0.999997	1418	2	0.040134	0.10346	0.26338	0.999834	476	3	0.040134\	3.27285
IKBKAP	6	0.11073	0.26869	0.982617	527	4	-0.29362	0.10359	0.26363	0.999834	477	2	-0.29362\	3.27104
RMI1	6	0.92124	0.92444	0.999997	1754	1	0.33725	0.10408	0.26442	0.999834	478	4	0.33725\	3.26424
NTC_new_1073	6	0.31225	0.5271	0.999997	1008	2	0.24397	0.10473	0.2655	0.999834	479	4	0.24397\	3.25525
NTC_new_961	6	0.25334	0.46291	0.999997	888	2	0.27301	0.10473	0.2655	0.999834	480	4	0.27301\	3.25525
NTC_new_1071	6	0.1091	0.26539	0.98132	508	2	0.23522	0.10478	0.2656	0.999834	485	3	0.23522\	3.25456
NTC_new_371	6	0.21792	0.42278	0.999997	806	2	0.27728	0.10478	0.2656	0.999834	482	4	0.27728\	3.25456
NTC_new_412	6	0.603	0.75166	0.999997	1416	2	0.15449	0.10478	0.2656	0.999834	481	3	0.15449\	3.25456
NTC_new_601	6	0.27367	0.48514	0.999997	932	3	0.090878	0.10478	0.2656	0.999834	483	3	0.090878\	3.25456
NTC_new_97	6	0.603	0.75166	0.999997	1414	1	0.17634	0.10478	0.2656	0.999834	484	3	0.17634\	3.25456
RARA	6	0.082928	0.21483	0.948362	434	4	-0.30687	0.10581	0.26737	0.999834	486	2	-0.30687\	3.24045
SUV420H1	6	0.2608	0.47119	0.999997	898	2	0.1392	0.10722	0.27005	0.999834	487	3	0.1392\	3.22135
HIST1H1D	6	0.24147	0.44945	0.999997	855	3	0.0010275	0.10755	0.27055	0.999834	488	3	0.0010275\	3.21692
NTC_new_704	6	0.25095	0.46014	0.999997	879	2	0.2915	0.10764	0.2707	0.999834	489	4	0.2915\	3.21571
NFYB	6	0.58945	0.74266	0.999997	1395	2	0.10104	0.10855	0.27222	0.999834	490	2	0.10104\	3.20357
NTC_new_401	6	0.67548	0.80045	0.999997	1518	2	0.12003	0.10885	0.27274	0.999834	491	3	0.12003\	3.19959
NTC_new_494	6	0.53715	0.71069	0.999997	1346	1	0.20794	0.10885	0.27274	0.999834	492	3	0.20794\	3.19959
ATRX	6	0.95288	0.95261	0.999997	1807	0	0.34006	0.10929	0.27349	0.999834	493	4	0.34006\	3.19377
PCGF3	6	0.93773	0.9381	0.999997	1783	1	0.3177	0.11046	0.27573	0.999834	494	4	0.3177\	3.1784
NTC_new_11	6	0.31225	0.5271	0.999997	1007	1	0.28713	0.11098	0.27665	0.999834	503	4	0.28713\	3.17163
NTC_new_161	6	0.016102	0.059762	0.766474	148	3	0.003855	0.11098	0.27665	0.999834	501	3	0.003855\	3.17163
NTC_new_176	6	0.64154	0.77698	0.999997	1467	2	0.23001	0.11098	0.27665	0.999834	495	4	0.23001\	3.17163
NTC_new_196	6	0.099826	0.24778	0.98132	482	4	-0.29044	0.11098	0.27665	0.999834	504	2	-0.29044\	3.17163
NTC_new_201	6	0.1091	0.26539	0.98132	514	3	-0.1548	0.11098	0.27665	0.999834	496	1	-0.1548\	3.17163
NTC_new_233	6	0.23739	0.44469	0.999997	850	2	0.21953	0.11098	0.27665	0.999834	498	4	0.21953\	3.17163
NTC_new_705	6	0.069925	0.18897	0.927564	391	4	-0.23353	0.11098	0.27665	0.999834	502	2	-0.23353\	3.17163
NTC_new_719	6	0.98702	0.98662	0.999997	1886	0	0.21651	0.11098	0.27665	0.999834	499	4	0.21651\	3.17163
NTC_new_740	6	0.0093373	0.037267	0.732989	76	4	-0.23618	0.11098	0.27665	0.999834	500	2	-0.23618\	3.17163
NTC_new_756	6	0.66916	0.79624	0.999997	1509	2	-0.002267	0.11098	0.27665	0.999834	497	2	-0.002267\	3.17163
NTC_new_1040	6	0.44685	0.6569	0.999997	1250	1	0.33836	0.11148	0.27756	0.999834	506	4	0.33836\	3.16514
NTC_new_1066	6	0.1453	0.331	0.986369	646	2	0.067419	0.11148	0.27756	0.999834	508	3	0.067419\	3.16514
NTC_new_135	6	0.36071	0.57842	0.999997	1096	3	-0.066256	0.11148	0.27756	0.999834	509	2	-0.066256\	3.16514
NTC_new_930	6	0.31863	0.53405	0.999997	1020	2	0.11064	0.11148	0.27756	0.999834	507	3	0.11064\	3.16514
NTC_new_956	6	0.73328	0.84098	0.999997	1599	2	0.063975	0.11148	0.27756	0.999834	505	3	0.063975\	3.16514
CSNK2A1	6	0.93492	0.93544	0.999997	1779	1	0.26139	0.11238	0.27903	0.999834	510	4	0.26139\	3.15354
NTC_new_1031	6	0.69867	0.81599	0.999997	1541	2	0.28505	0.11487	0.28355	0.999834	511	4	0.28505\	3.12193
NTC_new_441	6	0.18899	0.38945	0.999997	741	2	0.27176	0.11487	0.28355	0.999834	513	4	0.27176\	3.12193
NTC_new_55	6	0.91698	0.92144	0.999997	1749	1	0.25729	0.11487	0.28355	0.999834	515	4	0.25729\	3.12193
NTC_new_677	6	0.43507	0.6498	0.999997	1237	2	0.21872	0.11487	0.28355	0.999834	514	3	0.21872\	3.12193
NTC_new_971	6	0.046604	0.14172	0.882255	306	2	0.20084	0.11487	0.28355	0.999834	512	3	0.20084\	3.12193
NTC_new_105	6	0.60729	0.75471	0.999997	1420	2	0.30457	0.11498	0.28376	0.999834	516	4	0.30457\	3.12055
NTC_new_531	6	0.12678	0.29826	0.986369	583	1	0.30457	0.11498	0.28376	0.999834	519	4	0.30457\	3.12055
NTC_new_792	6	0.82327	0.87352	0.999997	1661	1	0.22833	0.11498	0.28376	0.999834	517	4	0.22833\	3.12055
NTC_new_804	6	0.33775	0.55479	0.999997	1051	1	0.2731	0.11498	0.28376	0.999834	521	4	0.2731\	3.12055
NTC_new_948	6	0.90408	0.91253	0.999997	1730	1	0.2336	0.11498	0.28376	0.999834	520	4	0.2336\	3.12055
NTC_new_970	6	0.94658	0.94638	0.999997	1799	0	0.24396	0.11498	0.28376	0.999834	518	4	0.24396\	3.12055
RUVBL2	6	0.44671	0.65682	0.999997	1248	2	0.44719	0.11511	0.284	0.999834	522	4	0.44719\	3.11891
RBBP7	6	0.41094	0.62989	0.999997	1205	2	0.010445	0.11612	0.28577	0.999834	523	2	0.010445\	3.10631
PHF14	6	0.33722	0.55428	0.999997	1049	3	-0.04151	0.11613	0.28581	0.999834	524	3	-0.04151\	3.10619
SMARCA1	6	0.83005	0.87626	0.999997	1669	1	0.2648	0.11647	0.28637	0.999834	525	4	0.2648\	3.10197
BABAM1	6	0.12979	0.30352	0.986369	588	4	-0.18307	0.11658	0.28655	0.999834	526	1	-0.18307\	3.10061
CDC73	6	0.89899	0.90936	0.999997	1724	1	0.36069	0.11707	0.28735	0.999834	529	4	0.36069\	3.09456
HIST2H4A	6	0.092317	0.23293	0.97443	460	2	0.059049	0.11707	0.28735	0.999834	527	2	0.059049\	3.09456
HIST2H4B	6	0.092317	0.23293	0.97443	461	2	0.059049	0.11707	0.28735	0.999834	528	2	0.059049\	3.09456
HUWE1	6	0.2262	0.43215	0.999997	824	2	0.26064	0.11798	0.28883	0.999834	530	4	0.26064\	3.08339
NTC_new_305	6	0.98859	0.98823	0.999997	1895	0	0.26951	0.11862	0.29005	0.999834	531	4	0.26951\	3.07558
NTC_new_889	6	0.75216	0.85041	0.999997	1620	1	0.22576	0.11862	0.29005	0.999834	532	4	0.22576\	3.07558
HIST1H2AC	6	0.32299	0.53876	0.999997	1031	3	0.016233	0.11891	0.29052	0.999834	533	3	0.016233\	3.07206
NTC_new_3	6	0.022429	0.079978	0.868979	178	3	-0.15312	0.11956	0.29152	0.999834	536	2	-0.15312\	3.06419
NTC_new_709	6	0.18899	0.38945	0.999997	746	2	0.023077	0.11956	0.29152	0.999834	534	2	0.023077\	3.06419
NTC_new_737	6	0.15669	0.35075	0.989288	682	2	-0.019776	0.11956	0.29152	0.999834	538	2	-0.019776\	3.06419
NTC_new_743	6	0.94478	0.94481	0.999997	1793	1	0.049527	0.11956	0.29152	0.999834	537	2	0.049527\	3.06419
NTC_new_900	6	0.16194	0.35792	0.989288	690	2	0.050351	0.11956	0.29152	0.999834	535	2	0.050351\	3.06419
CTBP2	6	0.13688	0.31625	0.986369	616	2	0.32095	0.11982	0.29205	0.999834	539	3	0.32095\	3.06106
HIST2H2BE	6	0.67463	0.79996	0.999997	1517	2	-0.037553	0.1203	0.29281	0.999834	540	2	-0.037553\	3.05529
CUL5	6	0.14435	0.32938	0.986369	633	2	0.21512	0.12075	0.29353	0.999834	541	4	0.21512\	3.0499
PCGF6	6	0.079491	0.20788	0.940953	424	4	-0.3028	0.12077	0.29354	0.999834	542	2	-0.3028\	3.04967
NTC_new_142	6	0.54551	0.71601	0.999997	1353	1	0.23463	0.12233	0.29642	0.999834	543	4	0.23463\	3.03115
NTC_new_6	6	0.97562	0.97532	0.999997	1855	0	0.28278	0.12233	0.29642	0.999834	544	4	0.28278\	3.03115
NTC_new_733	6	0.83989	0.8803	0.999997	1682	1	0.27189	0.12298	0.29771	0.999834	545	4	0.27189\	3.0235
HCFC2	6	0.071484	0.19215	0.932503	396	3	-0.16747	0.12355	0.29868	0.999834	546	3	-0.16747\	3.01683
NTC_new_139	6	0.16194	0.35792	0.989288	692	2	0.21255	0.12469	0.3006	0.999834	548	4	0.21255\	3.00358
NTC_new_193	6	0.0456	0.13955	0.882013	298	2	0.17457	0.12469	0.3006	0.999834	547	4	0.17457\	3.00358
NTC_new_169	6	0.10964	0.26635	0.98132	520	3	-0.12102	0.12475	0.30066	0.999834	549	2	-0.12102\	3.00289
NTC_new_375	6	0.93396	0.93455	0.999997	1776	1	0.058733	0.12475	0.30066	0.999834	550	3	0.058733\	3.00289
TDRD1	6	0.10956	0.26623	0.98132	518	4	-0.27546	0.12494	0.30108	0.999834	551	2	-0.27546\	3.00069
HMGB3	6	0.34914	0.56647	0.999997	1077	3	-0.099003	0.12586	0.3026	0.999834	552	2	-0.099003\	2.99011
NTC_new_309	6	0.51044	0.69452	0.999997	1320	2	0.2588	0.1288	0.30752	0.999834	554	4	0.2588\	2.9568
NTC_new_731	6	0.12678	0.29826	0.986369	579	2	0.23267	0.1288	0.30752	0.999834	553	4	0.23267\	2.9568
NTC_new_815	6	0.48985	0.68209	0.999997	1297	2	0.2173	0.1288	0.30752	0.999834	555	4	0.2173\	2.9568
SP140L	6	0.0011315	0.0059206	0.588538	15	4	-0.45541	0.12895	0.30776	0.999834	556	2	-0.45541\	2.95512
NTC_new_187	6	0.73946	0.84565	0.999997	1608	1	0.26285	0.13038	0.31008	0.999834	560	4	0.26285\	2.93921
NTC_new_255	6	0.5215	0.70113	0.999997	1329	2	0.27898	0.13038	0.31008	0.999834	559	4	0.27898\	2.93921
NTC_new_399	6	0.34921	0.56653	0.999997	1080	1	0.28688	0.13038	0.31008	0.999834	558	4	0.28688\	2.93921
NTC_new_786	6	0.12678	0.29826	0.986369	572	3	0.08311	0.13038	0.31008	0.999834	557	3	0.08311\	2.93921
NTC_new_138	6	0.69262	0.8119	0.999997	1535	2	0.072991	0.1324	0.31354	0.999834	562	3	0.072991\	2.91702
NTC_new_440	6	0.014122	0.053101	0.732989	129	3	-0.064316	0.1324	0.31354	0.999834	563	2	-0.064316\	2.91702
NTC_new_875	6	0.35244	0.5699	0.999997	1085	3	-0.0072465	0.1324	0.31354	0.999834	564	3	-0.0072465\	2.91702
NTC_new_908	6	0.8728	0.8949	0.999997	1703	1	0.20941	0.1324	0.31354	0.999834	565	4	0.20941\	2.91702
NTC_new_937	6	0.25037	0.45953	0.999997	873	3	0.02932	0.1324	0.31354	0.999834	561	3	0.02932\	2.91702
APEX1	6	0.22458	0.4304	0.999997	821	2	0.14726	0.13367	0.31567	0.999834	566	3	0.14726\	2.90325
NTC_new_1017	6	0.83164	0.87691	0.999997	1671	1	0.23389	0.13368	0.31568	0.999834	571	3	0.23389\	2.90314
NTC_new_146	6	0.54551	0.71601	0.999997	1354	2	0.066116	0.13368	0.31568	0.999834	568	3	0.066116\	2.90314
NTC_new_188	6	0.033328	0.1122	0.882013	239	4	-0.31243	0.13368	0.31568	0.999834	577	1	-0.31243\	2.90314
NTC_new_295	6	0.37243	0.59034	0.999997	1127	3	-0.021248	0.13368	0.31568	0.999834	576	2	-0.021248\	2.90314
NTC_new_296	6	0.9257	0.92777	0.999997	1762	1	0.28611	0.13368	0.31568	0.999834	578	4	0.28611\	2.90314
NTC_new_394	6	0.83678	0.87898	0.999997	1676	1	0.057774	0.13368	0.31568	0.999834	573	2	0.057774\	2.90314
NTC_new_439	6	0.049416	0.14769	0.894038	318	3	-0.25852	0.13368	0.31568	0.999834	572	3	-0.25852\	2.90314
NTC_new_450	6	0.80657	0.86736	0.999997	1652	1	0.030444	0.13368	0.31568	0.999834	575	3	0.030444\	2.90314
NTC_new_496	6	0.18899	0.38945	0.999997	742	3	-0.097459	0.13368	0.31568	0.999834	574	2	-0.097459\	2.90314
NTC_new_575	6	0.042541	0.13316	0.882013	276	3	-0.35423	0.13368	0.31568	0.999834	567	1	-0.35423\	2.90314
NTC_new_578	6	0.064326	0.17755	0.898904	376	3	-0.16834	0.13368	0.31568	0.999834	579	2	-0.16834\	2.90314
NTC_new_64	6	0.71633	0.82879	0.999997	1576	1	0.13529	0.13368	0.31568	0.999834	570	3	0.13529\	2.90314
NTC_new_647	6	0.57357	0.73323	0.999997	1382	2	0.047595	0.13368	0.31568	0.999834	569	3	0.047595\	2.90314
NTC_new_674	6	0.43507	0.6498	0.999997	1238	1	-0.0041426	0.13368	0.31568	0.999834	583	2	-0.0041426\	2.90314
NTC_new_707	6	0.93396	0.93455	0.999997	1775	1	-0.035693	0.13368	0.31568	0.999834	580	2	-0.035693\	2.90314
NTC_new_947	6	0.064326	0.17755	0.898904	378	2	-0.016742	0.13368	0.31568	0.999834	582	2	-0.016742\	2.90314
NTC_new_965	6	0.45967	0.66441	0.999997	1263	2	0.15843	0.13368	0.31568	0.999834	581	4	0.15843\	2.90314
BRDT	6	0.48632	0.6799	0.999997	1293	2	0.29765	0.13379	0.31585	0.999834	584	4	0.29765\	2.90196
NTC_new_457	6	0.55322	0.7206	0.999997	1364	2	0.22767	0.1345	0.31703	0.999834	586	4	0.22767\	2.89432
NTC_new_459	6	0.34665	0.56409	0.999997	1073	2	0.20934	0.1345	0.31703	0.999834	585	4	0.20934\	2.89432
NTC_new_378	6	0.89479	0.9068	0.999997	1720	1	0.24887	0.13607	0.31967	0.999834	588	4	0.24887\	2.87758
NTC_new_626	6	0.1091	0.26539	0.98132	510	2	0.12096	0.13607	0.31967	0.999834	587	3	0.12096\	2.87758
NTC_new_672	6	0.28301	0.4954	0.999997	953	2	0.22272	0.13607	0.31967	0.999834	589	3	0.22272\	2.87758
NTC_new_272	6	0.92887	0.9304	0.999997	1764	1	0.19005	0.13751	0.32212	0.999834	590	4	0.19005\	2.86239
NTC_new_717	6	0.12678	0.29826	0.986369	575	2	0.24069	0.13751	0.32212	0.999834	591	4	0.24069\	2.86239
SETD3	6	0.65101	0.78355	0.999997	1481	2	0.33396	0.1388	0.32406	0.999834	592	4	0.33396\	2.84892
TDRD5	6	0.62176	0.76378	0.999997	1442	1	0.31508	0.1389	0.32422	0.999834	593	4	0.31508\	2.84788
SRSF3	6	0.011426	0.044291	0.732989	88	4	-0.56879	0.13892	0.32426	0.999834	594	2	-0.56879\	2.84767
SP140	6	0.24049	0.44822	0.999997	853	2	0.14869	0.13911	0.3246	0.999834	595	3	0.14869\	2.8457
SETD5	6	0.9835	0.98329	0.999997	1876	0	0.25412	0.14018	0.32636	0.999834	596	3	0.25412\	2.83465
NTC_new_278	6	0.47023	0.67043	0.999997	1273	1	0.22887	0.14051	0.32689	0.999834	597	4	0.22887\	2.83126
NTC_new_763	6	0.25334	0.46291	0.999997	882	2	0.28865	0.14051	0.32689	0.999834	598	4	0.28865\	2.83126
RCC1	6	0.62542	0.76626	0.999997	1450	1	-0.012814	0.14091	0.32767	0.999834	599	2	-0.012814\	2.82715
CHRAC1	6	0.39878	0.61782	0.999997	1183	2	-0.048853	0.14127	0.32838	0.999834	600	2	-0.048853\	2.82347
RAI1	6	0.29601	0.50964	0.999997	981	3	-0.18689	0.14235	0.33014	0.999834	601	1	-0.18689\	2.81249
JAK2	6	0.65507	0.78621	0.999997	1490	2	0.22004	0.14254	0.33042	0.999834	602	4	0.22004\	2.81056
KDM3B	6	0.81041	0.86878	0.999997	1653	1	0.36428	0.14286	0.33106	0.999834	603	4	0.36428\	2.80733
KMT2C	6	0.045033	0.13835	0.882013	289	3	-0.23029	0.14326	0.33172	0.999834	604	2	-0.23029\	2.80329
NTC_new_42	6	0.18899	0.38945	0.999997	750	2	0.27279	0.14357	0.33224	0.999834	605	4	0.27279\	2.80017
NTC_new_1092	6	0.57671	0.73515	0.999997	1384	1	0.16093	0.14636	0.33675	0.999834	606	3	0.16093\	2.77241
NTC_new_966	6	0.90408	0.91253	0.999997	1733	1	0.095999	0.14636	0.33675	0.999834	607	3	0.095999\	2.77241
NTC_new_26	6	0.73328	0.84098	0.999997	1598	2	0.24677	0.14675	0.33738	0.999834	611	3	0.24677\	2.76857
NTC_new_283	6	0.2214	0.4267	0.999997	816	3	0.15369	0.14675	0.33738	0.999834	609	3	0.15369\	2.76857
NTC_new_485	6	0.1305	0.30481	0.986369	589	3	0.062016	0.14675	0.33738	0.999834	610	3	0.062016\	2.76857
NTC_new_753	6	0.47023	0.67043	0.999997	1276	2	0.27995	0.14675	0.33738	0.999834	608	4	0.27995\	2.76857
NTC_new_134	6	0.85641	0.88722	0.999997	1693	1	0.20715	0.14698	0.33783	0.999834	613	4	0.20715\	2.76631
NTC_new_560	6	0.86151	0.88957	0.999997	1695	1	0.17005	0.14698	0.33783	0.999834	612	4	0.17005\	2.76631
DNMT3L	6	0.40003	0.61913	0.999997	1184	3	0.1464	0.14809	0.33966	0.999834	614	3	0.1464\	2.75545
SNAI2	6	0.76403	0.85358	0.999997	1626	1	0.073351	0.1487	0.34076	0.999834	615	2	0.073351\	2.74952
HIF1AN	6	0.83494	0.87828	0.999997	1674	1	0.40851	0.14912	0.34148	0.999834	616	4	0.40851\	2.74545
VRK1	6	0.92093	0.92422	0.999997	1752	1	0.23254	0.14955	0.34218	0.999834	617	4	0.23254\	2.7413
PAXIP1	6	0.84946	0.88431	0.999997	1689	1	0.30137	0.14984	0.34259	0.999834	618	4	0.30137\	2.73851
NTC_new_250	6	0.35659	0.57397	0.999997	1089	2	0.22361	0.15093	0.34445	0.999834	619	4	0.22361\	2.72805
NTC_new_516	6	0.95094	0.95067	0.999997	1804	0	0.17029	0.15093	0.34445	0.999834	621	3	0.17029\	2.72805
NTC_new_557	6	0.83164	0.87691	0.999997	1672	1	0.21134	0.15093	0.34445	0.999834	620	3	0.21134\	2.72805
NTC_new_627	6	0.97201	0.97165	0.999997	1844	0	0.22099	0.15139	0.34526	0.999834	623	4	0.22099\	2.72366
NTC_new_645	6	0.37572	0.59388	0.999997	1136	2	0.21404	0.15139	0.34526	0.999834	622	4	0.21404\	2.72366
NEK9	6	0.18915	0.38966	0.999997	751	2	0.26441	0.15301	0.34778	0.999834	624	4	0.26441\	2.7083
NTC_new_1007	6	0.7117	0.82545	0.999997	1567	2	-0.09621	0.15307	0.34786	0.999834	625	2	-0.09621\	2.70774
NTC_new_1048	6	0.0019692	0.0099803	0.689356	28	4	-0.61103	0.15307	0.34786	0.999834	627	2	-0.61103\	2.70774
NTC_new_316	6	0.11717	0.28073	0.986369	542	4	-0.21757	0.15307	0.34786	0.999834	626	2	-0.21757\	2.70774
NTC_new_702	6	0.25334	0.46291	0.999997	887	2	0.037159	0.15307	0.34786	0.999834	628	3	0.037159\	2.70774
USP46	6	0.76986	0.85525	0.999997	1629	1	0.24981	0.15368	0.34897	0.999834	629	4	0.24981\	2.702
SIRT4	6	0.16794	0.36493	0.99551	707	2	0.18447	0.15499	0.351	0.999834	630	4	0.18447\	2.68975
NTC_new_1035	6	0.014122	0.053101	0.732989	136	2	0.10895	0.15657	0.35342	0.999834	640	3	0.10895\	2.67512
NTC_new_1064	6	0.82696	0.87506	0.999997	1667	1	-0.0055895	0.15657	0.35342	0.999834	642	2	-0.0055895\	2.67512
NTC_new_13	6	0.36833	0.58629	0.999997	1112	2	0.056381	0.15657	0.35342	0.999834	643	3	0.056381\	2.67512
NTC_new_136	6	0.58465	0.7399	0.999997	1391	2	0.015857	0.15657	0.35342	0.999834	645	3	0.015857\	2.67512
NTC_new_172	6	0.0456	0.13955	0.882013	290	4	-0.12173	0.15657	0.35342	0.999834	641	1	-0.12173\	2.67512
NTC_new_178	6	0.20651	0.40996	0.999997	789	2	0.010381	0.15657	0.35342	0.999834	639	2	0.010381\	2.67512
NTC_new_219	6	0.66075	0.7902	0.999997	1496	1	0.16201	0.15657	0.35342	0.999834	631	4	0.16201\	2.67512
NTC_new_225	6	0.27996	0.49212	0.999997	947	3	-0.020977	0.15657	0.35342	0.999834	636	3	-0.020977\	2.67512
NTC_new_280	6	0.31238	0.52729	0.999997	1011	3	-0.1111	0.15657	0.35342	0.999834	638	2	-0.1111\	2.67512
NTC_new_354	6	0.20053	0.40306	0.999997	770	3	-0.13485	0.15657	0.35342	0.999834	635	2	-0.13485\	2.67512
NTC_new_433	6	0.014122	0.053101	0.732989	130	1	0.13665	0.15657	0.35342	0.999834	633	4	0.13665\	2.67512
NTC_new_714	6	0.085386	0.21968	0.948362	438	1	0.0064303	0.15657	0.35342	0.999834	632	2	0.0064303\	2.67512
NTC_new_751	6	0.064326	0.17755	0.898904	380	3	0.029758	0.15657	0.35342	0.999834	644	3	0.029758\	2.67512
NTC_new_88	6	0.15131	0.34168	0.987568	663	2	0.073437	0.15657	0.35342	0.999834	637	3	0.073437\	2.67512
NTC_new_99	6	0.46816	0.66924	0.999997	1269	2	0.1802	0.15657	0.35342	0.999834	634	3	0.1802\	2.67512
HIST1H2AG	6	0.11767	0.28164	0.986369	545	3	-0.20593	0.15688	0.35391	0.999834	646	2	-0.20593\	2.67227
KMT2A	6	0.2612	0.47167	0.999997	900	1	0.39433	0.1572	0.35445	0.999834	647	4	0.39433\	2.66933
NTC_new_523	6	0.8728	0.8949	0.999997	1704	1	0.23822	0.15885	0.35718	0.999834	651	4	0.23822\	2.65426
NTC_new_711	6	0.10964	0.26635	0.98132	523	2	0.12293	0.15885	0.35718	0.999834	648	3	0.12293\	2.65426
NTC_new_921	6	0.1453	0.331	0.986369	643	3	0.10047	0.15885	0.35718	0.999834	649	3	0.10047\	2.65426
NTC_new_959	6	0.25334	0.46291	0.999997	883	2	0.18491	0.15885	0.35718	0.999834	650	3	0.18491\	2.65426
NTC_new_1044	6	0.98702	0.98662	0.999997	1888	0	0.1791	0.15914	0.35767	0.999834	653	4	0.1791\	2.65163
NTC_new_418	6	0.49936	0.68772	0.999997	1306	2	0.1791	0.15914	0.35767	0.999834	654	4	0.1791\	2.65163
NTC_new_95	6	0.30713	0.5217	0.999997	1001	2	0.22628	0.15914	0.35767	0.999834	652	4	0.22628\	2.65163
NTC_new_332	6	0.014122	0.053101	0.732989	110	1	0.20364	0.16071	0.36017	0.999834	655	4	0.20364\	2.63747
NTC_new_417	6	0.46012	0.66464	0.999997	1266	2	-0.0080251	0.16071	0.36017	0.999834	658	2	-0.0080251\	2.63747
NTC_new_587	6	0.34921	0.56653	0.999997	1079	1	0.050171	0.16071	0.36017	0.999834	657	3	0.050171\	2.63747
NTC_new_967	6	0.69867	0.81599	0.999997	1542	2	0.016995	0.16071	0.36017	0.999834	656	2	0.016995\	2.63747
BRCC3	6	0.92315	0.92581	0.999997	1758	1	0.17571	0.16144	0.36139	0.999834	659	4	0.17571\	2.63093
SETD8	6	0.90253	0.9115	0.999997	1727	1	0.47237	0.16185	0.36219	0.999834	660	4	0.47237\	2.62727
NTC_new_302	6	0.63823	0.77474	0.999997	1466	1	0.21675	0.16256	0.36333	0.999834	661	4	0.21675\	2.62096
NTC_new_642	6	0.15669	0.35075	0.989288	684	2	0.22426	0.16256	0.36333	0.999834	662	4	0.22426\	2.62096
NTC_new_987	6	0.25334	0.46291	0.999997	889	2	0.1626	0.16256	0.36333	0.999834	663	4	0.1626\	2.62096
ARID1B	6	0.28964	0.50255	0.999997	966	1	0.2733	0.16399	0.36572	0.999834	664	4	0.2733\	2.60832
HIST1H2BD	6	0.42306	0.64245	0.999997	1228	2	0.26591	0.16439	0.36629	0.999834	666	4	0.26591\	2.60481
SUDS3	6	0.92302	0.92573	0.999997	1756	1	0.1455	0.16439	0.36627	0.999834	665	3	0.1455\	2.60481
KDM5A	6	0.91515	0.92001	0.999997	1744	1	0.24951	0.1646	0.36662	0.999834	667	4	0.24951\	2.60296
CHD3	6	0.03286	0.11071	0.882013	236	2	0.18969	0.16494	0.36722	0.999834	668	4	0.18969\	2.59999
L3MBTL3	6	0.14782	0.33554	0.987568	656	2	0.25762	0.16506	0.36741	0.999834	669	4	0.25762\	2.59894
NTC_new_1050	6	0.014122	0.053101	0.732989	137	2	0.20006	0.16655	0.36966	0.999834	673	3	0.20006\	2.58597
NTC_new_200	6	0.27996	0.49212	0.999997	941	3	0.047657	0.16655	0.36966	0.999834	670	3	0.047657\	2.58597
NTC_new_304	6	0.16797	0.36495	0.99551	708	2	0.23457	0.16655	0.36966	0.999834	672	4	0.23457\	2.58597
NTC_new_769	6	0.31225	0.5271	0.999997	1004	2	0.12254	0.16655	0.36966	0.999834	674	3	0.12254\	2.58597
NTC_new_914	6	0.014122	0.053101	0.732989	108	3	-0.0039293	0.16655	0.36966	0.999834	671	3	-0.0039293\	2.58597
ATN1	6	0.73051	0.83903	0.999997	1594	2	-0.01425	0.16794	0.37202	0.999834	675	2	-0.01425\	2.57398
NTC_new_189	6	0.54217	0.71396	0.999997	1352	2	0.14699	0.16806	0.37222	0.999834	678	3	0.14699\	2.57295
NTC_new_213	6	0.47023	0.67043	0.999997	1275	1	0.049211	0.16806	0.37222	0.999834	676	3	0.049211\	2.57295
NTC_new_774	6	0.6815	0.80461	0.999997	1525	1	0.20178	0.16806	0.37222	0.999834	677	3	0.20178\	2.57295
NTC_new_234	6	0.17944	0.37856	0.999997	726	2	0.2055	0.16814	0.37236	0.999834	680	4	0.2055\	2.57227
NTC_new_664	6	0.83678	0.87898	0.999997	1679	1	0.1791	0.16814	0.37236	0.999834	679	4	0.1791\	2.57227
ZBTB33	6	0.093032	0.23439	0.97443	464	3	-0.043504	0.16927	0.37425	0.999834	681	3	-0.043504\	2.5626
DNMT3B	6	0.034156	0.11471	0.882013	249	4	-0.45663	0.17015	0.37567	0.999834	682	1	-0.45663\	2.55512
NTC_new_348	6	0.603	0.75166	0.999997	1415	2	0.15181	0.17155	0.37802	0.999834	683	4	0.15181\	2.5433
PYGO1	6	0.11982	0.28551	0.986369	551	4	-0.32519	0.17324	0.3806	0.999834	684	2	-0.32519\	2.52916
G2E3	6	0.73617	0.84302	0.999997	1604	2	0.26336	0.17359	0.3812	0.999834	685	4	0.26336\	2.52624
RPH3A	6	0.21298	0.41743	0.999997	796	3	0.065397	0.17406	0.38191	0.999834	686	3	0.065397\	2.52234
TADA2A	6	0.8254	0.87439	0.999997	1665	1	0.3464	0.17447	0.38258	0.999834	687	3	0.3464\	2.51895
EID2	6	0.39016	0.60892	0.999997	1167	2	0.14923	0.17516	0.38375	0.999834	688	3	0.14923\	2.51325
HSPA1B	6	0.73539	0.84239	0.999997	1600	1	0.26292	0.1753	0.38396	0.999834	689	4	0.26292\	2.5121
ZNF592	6	0.92309	0.92575	0.999997	1757	1	0.25991	0.17544	0.38415	0.999834	690	3	0.25991\	2.51095
NTC_new_185	6	0.75625	0.85155	0.999997	1621	1	0.15236	0.17565	0.38451	0.999834	693	4	0.15236\	2.50922
NTC_new_248	6	0.73946	0.84565	0.999997	1609	1	0.14965	0.17565	0.38451	0.999834	695	4	0.14965\	2.50922
NTC_new_598	6	0.23473	0.44175	0.999997	844	1	0.16247	0.17565	0.38451	0.999834	692	4	0.16247\	2.50922
NTC_new_63	6	0.4034	0.62246	0.999997	1190	2	0.18726	0.17565	0.38451	0.999834	694	4	0.18726\	2.50922
NTC_new_856	6	0.88165	0.89924	0.999997	1710	1	0.16025	0.17565	0.38451	0.999834	691	4	0.16025\	2.50922
RSF1	6	0.93266	0.9336	0.999997	1772	1	0.17732	0.17571	0.38462	0.999834	696	3	0.17732\	2.50873
SATB1	6	0.0057924	0.025252	0.732989	56	5	-0.53302	0.17588	0.38487	0.999834	697	1	-0.53302\	2.50734
INO80B	6	0.66642	0.79417	0.999997	1506	2	0.27667	0.17599	0.3851	0.999834	698	3	0.27667\	2.50643
NTC_new_1042	6	0.66916	0.79624	0.999997	1510	1	0.032012	0.17637	0.38573	0.999834	703	2	0.032012\	2.50332
NTC_new_202	6	0.20127	0.40378	0.999997	773	3	-0.020477	0.17637	0.38573	0.999834	704	2	-0.020477\	2.50332
NTC_new_528	6	0.085386	0.21968	0.948362	439	2	0.14886	0.17637	0.38573	0.999834	701	3	0.14886\	2.50332
NTC_new_726	6	0.40957	0.62863	0.999997	1198	2	0.15363	0.17637	0.38573	0.999834	702	3	0.15363\	2.50332
NTC_new_791	6	0.27367	0.48514	0.999997	933	3	0.021459	0.17637	0.38573	0.999834	700	3	0.021459\	2.50332
NTC_new_941	6	0.1453	0.331	0.986369	642	2	0.082617	0.17637	0.38573	0.999834	699	3	0.082617\	2.50332
PRDM15	6	0.92099	0.92428	0.999997	1753	1	0.31792	0.17668	0.38622	0.999834	705	3	0.31792\	2.50079
PRDM1	6	0.56501	0.72788	0.999997	1371	2	0.2224	0.1772	0.38701	0.999834	706	3	0.2224\	2.49655
CTBP1	6	0.10157	0.25134	0.98132	486	2	0.18567	0.17748	0.38742	0.999834	707	4	0.18567\	2.49427
KDM7A	6	0.84173	0.88108	0.999997	1684	1	0.27748	0.1776	0.38761	0.999834	708	4	0.27748\	2.4933
ERBB4	6	0.079616	0.20817	0.940953	426	2	0.1212	0.17764	0.38768	0.999834	709	3	0.1212\	2.49297
PADI2	6	0.33131	0.54762	0.999997	1042	2	0.30208	0.17793	0.3882	0.999834	710	3	0.30208\	2.49062
SMYD4	6	0.34348	0.56094	0.999997	1065	2	-0.099989	0.17808	0.38838	0.999834	711	2	-0.099989\	2.4894
MYSM1	6	0.20324	0.4062	0.999997	783	3	-0.06484	0.17896	0.38979	0.999834	712	3	-0.06484\	2.48229
NTC_new_1093	6	0.20127	0.40378	0.999997	774	1	0.2228	0.17938	0.39051	0.999834	715	4	0.2228\	2.47891
NTC_new_349	6	0.61971	0.76244	0.999997	1439	2	0.26655	0.17938	0.39051	0.999834	714	4	0.26655\	2.47891
NTC_new_406	6	0.47023	0.67043	0.999997	1270	1	0.1778	0.17938	0.39051	0.999834	713	4	0.1778\	2.47891
NTC_new_163	6	0.021729	0.077813	0.859943	175	3	-0.067147	0.18009	0.3917	0.999834	719	3	-0.067147\	2.47321
NTC_new_687	6	0.0093373	0.037267	0.732989	79	2	0.12786	0.18009	0.3917	0.999834	718	3	0.12786\	2.47321
NTC_new_765	6	0.91196	0.91754	0.999997	1737	1	0.24923	0.18009	0.3917	0.999834	716	3	0.24923\	2.47321
NTC_new_838	6	0.29143	0.50451	0.999997	970	3	0.097015	0.18009	0.3917	0.999834	717	3	0.097015\	2.47321
PRMT6	6	0.093508	0.23534	0.974633	466	1	0.20283	0.18071	0.39264	0.999834	720	4	0.20283\	2.46825
ZNF532	6	0.86843	0.89291	0.999997	1699	1	0.15576	0.18114	0.39333	0.999834	721	3	0.15576\	2.46482
TLK1	6	0.36547	0.58332	0.999997	1105	2	0.22425	0.18177	0.39419	0.999834	722	4	0.22425\	2.45981
YY1	6	0.061926	0.17298	0.898904	360	3	-0.0454	0.18198	0.3946	0.999834	723	3	-0.0454\	2.45815
WDR82	6	0.72224	0.83311	0.999997	1582	2	0.24287	0.18202	0.39469	0.999834	724	3	0.24287\	2.45783
APOBEC3C	6	0.98025	0.98008	0.999997	1865	0	0.22399	0.18261	0.39561	0.999834	725	4	0.22399\	2.45316
SAFB	6	0.91388	0.91906	0.999997	1742	1	0.29462	0.18273	0.39581	0.999834	726	4	0.29462\	2.45221
NTC_new_355	6	0.10964	0.26635	0.98132	522	3	-0.18406	0.18312	0.39649	0.999834	729	2	-0.18406\	2.44914
NTC_new_397	6	0.63823	0.77474	0.999997	1465	2	0.030609	0.18312	0.39649	0.999834	728	3	0.030609\	2.44914
NTC_new_538	6	0.021729	0.077813	0.859943	173	4	-0.40377	0.18312	0.39649	0.999834	730	2	-0.40377\	2.44914
NTC_new_723	6	0.64154	0.77698	0.999997	1469	2	0.15471	0.18312	0.39649	0.999834	732	3	0.15471\	2.44914
NTC_new_81	6	0.97379	0.97348	0.999997	1849	0	0.13113	0.18312	0.39649	0.999834	731	3	0.13113\	2.44914
NTC_new_821	6	0.44103	0.65334	0.999997	1246	2	0.10626	0.18312	0.39649	0.999834	727	3	0.10626\	2.44914
NTC_new_958	6	0.042541	0.13316	0.882013	281	2	0.19931	0.18312	0.39649	0.999834	733	4	0.19931\	2.44914
HIST1H1B	6	0.95652	0.95651	0.999997	1813	0	0.19205	0.18406	0.39804	0.999834	734	4	0.19205\	2.44175
NTC_new_428	6	0.13901	0.31975	0.986369	618	2	0.12573	0.18537	0.4	0.999834	736	3	0.12573\	2.43152
NTC_new_435	6	0.57834	0.73622	0.999997	1386	2	0.18249	0.18537	0.4	0.999834	737	3	0.18249\	2.43152
NTC_new_452	6	0.26731	0.47834	0.999997	924	2	0.15405	0.18537	0.4	0.999834	738	3	0.15405\	2.43152
NTC_new_533	6	0.69262	0.8119	0.999997	1534	2	0.10234	0.18537	0.4	0.999834	735	3	0.10234\	2.43152
H2BFWT	6	0.29534	0.5089	0.999997	980	2	0.0012226	0.18638	0.40149	0.999834	739	2	0.0012226\	2.42368
NTC_new_1023	6	0.037734	0.12261	0.882013	265	2	0.17087	0.18642	0.40154	0.999834	742	4	0.17087\	2.42337
NTC_new_174	6	0.17944	0.37856	0.999997	728	2	0.21332	0.18642	0.40154	0.999834	743	4	0.21332\	2.42337
NTC_new_659	6	0.28301	0.4954	0.999997	954	2	0.17862	0.18642	0.40154	0.999834	741	4	0.17862\	2.42337
NTC_new_742	6	0.97452	0.97431	0.999997	1851	0	0.14468	0.18642	0.40154	0.999834	740	4	0.14468\	2.42337
H1FOO	6	0.17236	0.37009	0.999997	716	2	-0.052264	0.18681	0.40225	0.999834	744	2	-0.052264\	2.42036
PHF12	6	0.41565	0.63455	0.999997	1212	3	0.095443	0.18768	0.40357	0.999834	745	3	0.095443\	2.41365
MBTD1	6	0.012944	0.049129	0.732989	92	2	0.025546	0.18899	0.40567	0.999834	746	2	0.025546\	2.40362
NTC_new_451	6	0.18545	0.3854	0.999997	733	3	-0.059352	0.18925	0.4061	0.999834	747	3	-0.059352\	2.40163
NTC_new_579	6	0.050269	0.14942	0.894038	320	4	-0.31745	0.18925	0.4061	0.999834	748	2	-0.31745\	2.40163
SIN3A	6	0.20372	0.40678	0.999997	785	2	0.31618	0.18953	0.40655	0.999834	749	4	0.31618\	2.3995
BUB1	6	0.9759	0.97551	0.999997	1857	0	0.23357	0.19064	0.40828	0.999834	750	4	0.23357\	2.39108
NTC_new_1052	6	0.94792	0.94764	0.999997	1802	0	0.16233	0.19187	0.41038	0.999834	752	4	0.16233\	2.3818
NTC_new_577	6	0.603	0.75166	0.999997	1412	1	0.20832	0.19187	0.41038	0.999834	751	4	0.20832\	2.3818
NPM1	6	0.32698	0.54298	0.999997	1038	2	0.41187	0.19206	0.41062	0.999834	753	3	0.41187\	2.38037
CRB2	6	0.23308	0.4399	0.999997	838	3	0.009032	0.19221	0.41089	0.999834	754	3	0.009032\	2.37924
HDAC6	6	0.67659	0.80118	0.999997	1519	2	0.18603	0.19373	0.41325	0.999834	755	4	0.18603\	2.36788
PPP4C	6	0.73556	0.84254	0.999997	1601	1	0.47141	0.19447	0.41442	0.999834	756	4	0.47141\	2.36238
EPC2	6	0.32163	0.53734	0.999997	1027	3	0.028781	0.19522	0.41572	0.999834	757	3	0.028781\	2.35683
NTC_new_1081	6	0.13222	0.3079	0.986369	594	2	0.14324	0.19523	0.41573	0.999834	759	3	0.14324\	2.35675
NTC_new_267	6	0.029809	0.10151	0.882013	216	3	0.063408	0.19523	0.41573	0.999834	758	3	0.063408\	2.35675
NTC_new_517	6	0.19907	0.4013	0.999997	766	3	0.033256	0.19523	0.41573	0.999834	761	3	0.033256\	2.35675
NTC_new_764	6	0.41998	0.63917	0.999997	1221	2	0.17597	0.19523	0.41573	0.999834	762	3	0.17597\	2.35675
NTC_new_806	6	0.06657	0.18214	0.912597	385	3	-0.049578	0.19523	0.41573	0.999834	760	3	-0.049578\	2.35675
H2AFB2	6	0.41502	0.63401	0.999997	1211	2	0.014458	0.19591	0.41679	0.999834	764	2	0.014458\	2.35174
H2AFB3	6	0.41502	0.63401	0.999997	1210	2	0.014458	0.19591	0.41679	0.999834	763	2	0.014458\	2.35174
NTC_new_171	6	0.30071	0.51481	0.999997	990	2	0.13615	0.19622	0.41731	0.999834	767	4	0.13615\	2.34946
NTC_new_526	6	0.95537	0.95533	0.999997	1812	0	0.16594	0.19622	0.41731	0.999834	765	4	0.16594\	2.34946
NTC_new_608	6	0.73946	0.84565	0.999997	1610	1	0.15512	0.19622	0.41731	0.999834	766	4	0.15512\	2.34946
PRDM9	6	0.07672	0.20273	0.940953	413	3	-0.19218	0.19676	0.41814	0.999834	768	1	-0.19218\	2.34549
TET1	6	0.20233	0.40507	0.999997	780	2	0.2615	0.19798	0.41997	0.999834	769	3	0.2615\	2.33657
CBX7	6	0.61178	0.75749	0.999997	1429	2	0.16021	0.19934	0.42202	0.999834	770	3	0.16021\	2.3267
PRKCD	6	0.33882	0.55597	0.999997	1057	3	0.041399	0.19977	0.42264	0.999834	771	3	0.041399\	2.32359
TCF20	6	0.90297	0.91171	0.999997	1729	1	0.16094	0.19986	0.42276	0.999834	772	4	0.16094\	2.32294
KDM8	6	0.27593	0.48763	0.999997	939	2	0.22207	0.20036	0.42355	0.999834	773	4	0.22207\	2.31933
H2AFB1	6	0.84493	0.88235	0.999997	1686	1	0.24269	0.20163	0.42539	0.999834	774	4	0.24269\	2.31022
PARP2	6	0.19562	0.39732	0.999997	758	3	-0.1821	0.20194	0.4259	0.999834	775	2	-0.1821\	2.308
HDAC8	6	0.33963	0.5568	0.999997	1059	3	-0.089875	0.20234	0.42647	0.999834	776	2	-0.089875\	2.30515
RNF168	6	0.76419	0.85362	0.999997	1627	1	0.2245	0.20251	0.42673	0.999834	777	4	0.2245\	2.30393
HIST1H4B	6	0.89853	0.9091	0.999997	1723	1	0.25131	0.20277	0.42716	0.999834	778	4	0.25131\	2.30208
NTC_new_34	6	0.95913	0.95908	0.999997	1816	0	0.22853	0.20302	0.42753	0.999834	779	4	0.22853\	2.30031
NTC_new_854	6	0.055238	0.1597	0.898904	335	2	0.10477	0.20302	0.42753	0.999834	780	3	0.10477\	2.30031
NASP	6	0.54175	0.71369	0.999997	1350	1	0.2044	0.20315	0.42779	0.999834	781	4	0.2044\	2.29938
MECP2	6	0.023643	0.083608	0.882013	182	4	-0.34919	0.20432	0.42953	0.999834	782	2	-0.34919\	2.2911
CHTOP	6	0.87377	0.89539	0.999997	1705	1	0.060782	0.20491	0.43041	0.999834	783	3	0.060782\	2.28694
NTC_new_1087	6	0.59395	0.74558	0.999997	1402	2	0.18666	0.20493	0.43044	0.999834	786	4	0.18666\	2.2868
NTC_new_646	6	0.23473	0.44175	0.999997	840	2	0.20907	0.20493	0.43044	0.999834	784	4	0.20907\	2.2868
NTC_new_899	6	0.56883	0.73025	0.999997	1375	2	0.12018	0.20493	0.43044	0.999834	785	4	0.12018\	2.2868
NFYC	6	0.42243	0.6417	0.999997	1227	2	-0.0015389	0.20576	0.43168	0.999834	787	2	-0.0015389\	2.28097
NTC_new_1080	6	0.0456	0.13955	0.882013	302	2	0.10489	0.20692	0.43359	0.999834	791	3	0.10489\	2.27285
NTC_new_933	6	0.12678	0.29826	0.986369	574	3	0.10737	0.20692	0.43359	0.999834	789	3	0.10737\	2.27285
NTC_new_938	6	0.20127	0.40378	0.999997	776	2	0.14996	0.20692	0.43359	0.999834	790	3	0.14996\	2.27285
NTC_new_946	6	0.44685	0.6569	0.999997	1251	1	0.21815	0.20692	0.43359	0.999834	788	3	0.21815\	2.27285
GFI1B	6	0.063611	0.17624	0.898904	368	2	-0.056074	0.20704	0.43377	0.999834	792	2	-0.056074\	2.27202
DNTTIP2	6	0.61643	0.7604	0.999997	1435	2	0.31389	0.20853	0.43615	0.999834	793	4	0.31389\	2.26167
BRD3	6	0.093984	0.23632	0.97657	467	3	0.031172	0.20899	0.43687	0.999834	794	3	0.031172\	2.25849
MAP3K7	6	0.13569	0.31412	0.986369	607	3	-0.19678	0.20916	0.43711	0.999834	795	1	-0.19678\	2.25732
HIST1H3F	6	0.88278	0.89993	0.999997	1711	1	0.19557	0.20944	0.43752	0.999834	796	3	0.19557\	2.25539
SMARCAL1	6	0.065267	0.17949	0.906354	382	4	-0.31341	0.21001	0.43851	0.999834	797	2	-0.31341\	2.25147
NTC_new_112	6	0.60033	0.74976	0.999997	1409	2	-0.038867	0.2104	0.4391	0.999834	800	2	-0.038867\	2.24879
NTC_new_275	6	0.36833	0.58629	0.999997	1114	2	0.065725	0.2104	0.4391	0.999834	799	3	0.065725\	2.24879
NTC_new_284	6	0.096549	0.24149	0.979689	473	4	-0.25923	0.2104	0.4391	0.999834	801	2	-0.25923\	2.24879
NTC_new_65	6	0.267	0.47804	0.999997	917	2	0.19832	0.2104	0.4391	0.999834	798	3	0.19832\	2.24879
NTC_new_977	6	0.81816	0.87151	0.999997	1659	1	0.10309	0.2104	0.4391	0.999834	803	3	0.10309\	2.24879
NTC_new_98	6	0.31238	0.52729	0.999997	1012	3	-0.14888	0.2104	0.4391	0.999834	802	2	-0.14888\	2.24879
NTC_new_266	6	0.39867	0.61771	0.999997	1182	2	0.19277	0.21157	0.4409	0.999834	804	4	0.19277\	2.24079
NTC_new_279	6	0.75625	0.85155	0.999997	1623	1	0.14301	0.21157	0.4409	0.999834	806	4	0.14301\	2.24079
NTC_new_974	6	0.52921	0.70588	0.999997	1331	1	0.15245	0.21157	0.4409	0.999834	805	4	0.15245\	2.24079
NTC_new_1002	6	0.45967	0.66441	0.999997	1262	2	0.11576	0.2116	0.44093	0.999834	808	3	0.11576\	2.24059
NTC_new_1018	6	0.13901	0.31975	0.986369	620	3	0.01806	0.2116	0.44093	0.999834	807	3	0.01806\	2.24059
H1FX	6	0.11727	0.2809	0.986369	544	4	-0.21872	0.21171	0.44114	0.999834	809	2	-0.21872\	2.23984
HIST1H3G	6	0.29471	0.50829	0.999997	977	2	-0.12446	0.2134	0.44369	0.999834	810	2	-0.12446\	2.22837
NTC_new_1070	6	0.94286	0.94275	0.999997	1791	1	0.18331	0.21581	0.44722	0.999834	812	4	0.18331\	2.21217
NTC_new_125	6	0.66075	0.7902	0.999997	1498	1	0.19593	0.21581	0.44722	0.999834	811	4	0.19593\	2.21217
NTC_new_217	6	0.25095	0.46014	0.999997	877	2	0.085451	0.21601	0.44748	0.999834	813	3	0.085451\	2.21083
NTC_new_1001	6	0.69867	0.81599	0.999997	1544	2	0.057054	0.21772	0.44992	0.999834	820	3	0.057054\	2.19945
NTC_new_118	6	0.085386	0.21968	0.948362	445	2	0.051327	0.21772	0.44992	0.999834	816	3	0.051327\	2.19945
NTC_new_198	6	0.18678	0.38692	0.999997	739	3	-0.18107	0.21772	0.44992	0.999834	815	2	-0.18107\	2.19945
NTC_new_372	6	0.13901	0.31975	0.986369	619	2	0.030744	0.21772	0.44992	0.999834	814	3	0.030744\	2.19945
NTC_new_427	6	0.13957	0.32073	0.986369	623	4	-0.12247	0.21772	0.44992	0.999834	817	2	-0.12247\	2.19945
NTC_new_530	6	0.2053	0.4084	0.999997	787	3	-0.036766	0.21772	0.44992	0.999834	821	3	-0.036766\	2.19945
NTC_new_551	6	0.51029	0.69443	0.999997	1319	1	0.11323	0.21772	0.44992	0.999834	818	3	0.11323\	2.19945
NTC_new_90	6	0.59395	0.74558	0.999997	1400	1	0.016649	0.21772	0.44992	0.999834	819	2	0.016649\	2.19945
ERCC6	6	0.6331	0.77142	0.999997	1456	1	0.24766	0.21805	0.45042	0.999834	822	4	0.24766\	2.19727
DPF1	6	0.11472	0.27618	0.986369	532	1	0.21881	0.21818	0.45063	0.999834	823	4	0.21881\	2.19641
NAP1L1	6	0.97634	0.97596	0.999997	1859	0	0.15595	0.21857	0.45127	0.999834	824	4	0.15595\	2.19383
CHEK1	6	0.61411	0.75894	0.999997	1431	2	0.10908	0.2193	0.45233	0.999834	825	3	0.10908\	2.18902
GADD45B	6	0.93228	0.93323	0.999997	1771	1	0.22271	0.21963	0.45283	0.999834	826	4	0.22271\	2.18685
NTC_new_208	6	0.58465	0.7399	0.999997	1392	2	0.083232	0.2197	0.45294	0.999834	827	3	0.083232\	2.18639
SMARCAD1	6	0.63467	0.77246	0.999997	1461	1	0.2228	0.22056	0.45414	0.999834	828	4	0.2228\	2.18076
DPY30	6	0.72287	0.83352	0.999997	1583	1	0.18818	0.22096	0.45473	0.999834	829	4	0.18818\	2.17814
HIST1H3H	6	0.013366	0.050521	0.732989	100	2	0.14158	0.22202	0.4564	0.999834	830	4	0.14158\	2.17124
KDM4D	6	0.51947	0.6999	0.999997	1326	1	0.13457	0.22215	0.45658	0.999834	831	4	0.13457\	2.17039
HAT1	6	0.26399	0.47468	0.999997	904	2	-0.075384	0.22224	0.45666	0.999834	832	2	-0.075384\	2.16981
SMYD3	6	0.61518	0.75958	0.999997	1433	2	0.30725	0.22236	0.45676	0.999834	833	3	0.30725\	2.16903
VDR	6	0.29501	0.50859	0.999997	979	3	-0.084803	0.2235	0.4579	0.999834	834	2	-0.084803\	2.16165
NTC_new_1022	6	0.018366	0.066996	0.815701	158	4	-0.24683	0.22407	0.45851	0.999834	835	2	-0.24683\	2.15798
NTC_new_373	6	0.10636	0.26025	0.98132	503	4	-0.20884	0.22407	0.45851	0.999834	836	2	-0.20884\	2.15798
NTC_new_415	6	0.25442	0.46408	0.999997	891	3	-0.07965	0.22407	0.45851	0.999834	838	2	-0.07965\	2.15798
NTC_new_968	6	0.56883	0.73025	0.999997	1374	1	0.059184	0.22407	0.45851	0.999834	837	3	0.059184\	2.15798
NTC_new_700	6	0.603	0.75166	0.999997	1413	1	0.12191	0.22525	0.45973	0.999834	839	3	0.12191\	2.1504
PAK2	6	0.82479	0.87418	0.999997	1664	1	0.14327	0.228	0.46238	0.999834	840	3	0.14327\	2.13289
ASF1B	6	0.3194	0.53485	0.999997	1023	2	0.14666	0.22892	0.4633	0.999834	841	3	0.14666\	2.12708
NTC_new_1030	6	0.0456	0.13955	0.882013	303	2	0.12231	0.22934	0.46363	0.999834	842	3	0.12231\	2.12444
NTC_new_240	6	0.91698	0.92144	0.999997	1747	1	0.042726	0.22934	0.46363	0.999834	844	2	0.042726\	2.12444
NTC_new_404	6	0.1453	0.331	0.986369	638	2	-0.034929	0.22934	0.46363	0.999834	843	2	-0.034929\	2.12444
NTC_new_56	6	0.41299	0.6319	0.999997	1206	3	0.044122	0.22934	0.46363	0.999834	847	3	0.044122\	2.12444
NTC_new_727	6	0.16249	0.35859	0.989288	700	3	-0.053051	0.22934	0.46363	0.999834	846	3	-0.053051\	2.12444
NTC_new_934	6	0.029551	0.10077	0.882013	215	4	-0.3681	0.22934	0.46363	0.999834	845	2	-0.3681\	2.12444
LBR	6	0.28341	0.49588	0.999997	957	3	-0.006355	0.23061	0.46487	0.999834	848	3	-0.006355\	2.11647
NTC_new_27	6	0.5215	0.70113	0.999997	1328	2	-0.1013	0.23117	0.46544	0.999834	849	2	-0.1013\	2.11297
SIRT3	6	0.65641	0.7871	0.999997	1492	2	0.22897	0.23154	0.46583	0.999834	850	3	0.22897\	2.11067
HIST1H4I	6	0.71985	0.8313	0.999997	1581	2	0.16891	0.23277	0.46716	0.999834	851	3	0.16891\	2.10302
HIST1H2AH	6	0.033864	0.11381	0.882013	247	1	0.24677	0.2337	0.46807	0.999834	852	3	0.24677\	2.09727
SFMBT2	6	0.62439	0.76556	0.999997	1446	2	0.070639	0.23678	0.47111	0.999834	853	2	0.070639\	2.07838
RBBP4	6	0.13178	0.30712	0.986369	591	4	-0.28375	0.23844	0.47283	0.999834	854	2	-0.28375\	2.0683
MST1	6	0.14401	0.32888	0.986369	632	3	-0.26998	0.24049	0.47488	0.999834	855	2	-0.26998\	2.05595
NTC_new_448	6	0.032928	0.11092	0.882013	238	4	-0.34149	0.24067	0.47508	0.999834	856	2	-0.34149\	2.05487
CLOCK	6	0.25235	0.46173	0.999997	881	3	0.052986	0.241	0.47545	0.999834	857	3	0.052986\	2.05289
TDRD9	6	0.9439	0.94386	0.999997	1792	1	0.25181	0.24241	0.47697	0.999834	858	3	0.25181\	2.04448
HSPBAP1	6	0.013437	0.050741	0.732989	101	2	0.071402	0.24498	0.47943	0.999834	859	2	0.071402\	2.02926
HIST1H2AJ	6	0.91859	0.92256	0.999997	1751	1	0.079069	0.245	0.47945	0.999834	860	3	0.079069\	2.02915
SETD6	6	0.18246	0.38191	0.999997	732	3	0.018107	0.24541	0.4799	0.999834	861	3	0.018107\	2.02673
HIRIP3	6	0.32612	0.54209	0.999997	1037	3	-0.063612	0.24623	0.48066	0.999834	862	2	-0.063612\	2.02192
FBRSL1	6	0.11658	0.27968	0.986369	539	3	-0.10286	0.24704	0.48148	0.999834	863	2	-0.10286\	2.01718
USP17L2	6	0.51807	0.69908	0.999997	1325	2	0.13328	0.24724	0.4817	0.999834	864	3	0.13328\	2.01602
GLYR1	6	0.94552	0.94545	0.999997	1795	1	0.027739	0.24745	0.48196	0.999834	865	3	0.027739\	2.01479
NTC_new_953	6	0.036826	0.12069	0.882013	259	3	-0.12735	0.24934	0.48385	0.999834	866	3	-0.12735\	2.00381
ZCWPW2	6	0.29784	0.51171	0.999997	984	3	-0.095442	0.24971	0.48426	0.999834	867	3	-0.095442\	2.00167
NTC_new_111	6	0.61971	0.76244	0.999997	1438	2	0.10987	0.25466	0.48901	0.999834	874	3	0.10987\	1.97336
NTC_new_132	6	0.078123	0.20526	0.940953	417	3	-0.13249	0.25466	0.48901	0.999834	869	2	-0.13249\	1.97336
NTC_new_256	6	0.28301	0.4954	0.999997	955	3	0.033853	0.25466	0.48901	0.999834	870	3	0.033853\	1.97336
NTC_new_300	6	0.31225	0.5271	0.999997	1006	2	0.066871	0.25466	0.48901	0.999834	871	3	0.066871\	1.97336
NTC_new_380	6	0.38035	0.59855	0.999997	1144	1	0.055172	0.25466	0.48901	0.999834	875	3	0.055172\	1.97336
NTC_new_637	6	0.22934	0.43562	0.999997	834	3	-0.011513	0.25466	0.48901	0.999834	868	2	-0.011513\	1.97336
NTC_new_679	6	0.029551	0.10077	0.882013	214	3	-0.23235	0.25466	0.48901	0.999834	873	3	-0.23235\	1.97336
NTC_new_766	6	0.89171	0.90505	0.999997	1718	1	-0.062826	0.25466	0.48901	0.999834	872	2	-0.062826\	1.97336
NTC_new_863	6	0.68394	0.8061	0.999997	1526	2	0.092622	0.25505	0.48947	0.999834	876	3	0.092622\	1.97115
NTC_new_881	6	0.28301	0.4954	0.999997	956	1	0.14306	0.25505	0.48947	0.999834	877	3	0.14306\	1.97115
PSIP1	6	0.15576	0.34917	0.989288	677	3	-0.12357	0.25859	0.49295	0.999834	878	2	-0.12357\	1.95126
PRKAG1	6	0.22934	0.43562	0.999997	833	2	0.11843	0.25889	0.49327	0.999834	879	3	0.11843\	1.94959
NTC_new_221	6	0.014122	0.053101	0.732989	119	4	-0.27648	0.25899	0.49337	0.999834	885	2	-0.27648\	1.94903
NTC_new_331	6	0.44103	0.65334	0.999997	1244	2	0.10151	0.25899	0.49337	0.999834	890	3	0.10151\	1.94903
NTC_new_345	6	0.27367	0.48514	0.999997	931	3	-0.071633	0.25899	0.49337	0.999834	882	2	-0.071633\	1.94903
NTC_new_352	6	0.011388	0.044199	0.732989	87	5	-0.44501	0.25899	0.49337	0.999834	880	1	-0.44501\	1.94903
NTC_new_453	6	0.36833	0.58629	0.999997	1113	2	-0.058996	0.25899	0.49337	0.999834	886	1	-0.058996\	1.94903
NTC_new_541	6	0.965	0.96506	0.999997	1829	0	0.014067	0.25899	0.49337	0.999834	894	2	0.014067\	1.94903
NTC_new_562	6	0.15193	0.34264	0.987568	665	4	-0.1978	0.25899	0.49337	0.999834	891	1	-0.1978\	1.94903
NTC_new_586	6	0.023471	0.083137	0.882013	180	5	-0.23798	0.25899	0.49337	0.999834	887	1	-0.23798\	1.94903
NTC_new_686	6	0.15193	0.34264	0.987568	666	4	-0.17273	0.25899	0.49337	0.999834	881	2	-0.17273\	1.94903
NTC_new_698	6	0.7392	0.84543	0.999997	1606	2	0.10836	0.25899	0.49337	0.999834	889	3	0.10836\	1.94903
NTC_new_762	6	0.36071	0.57842	0.999997	1095	3	-0.07997	0.25899	0.49337	0.999834	883	2	-0.07997\	1.94903
NTC_new_780	6	0.085386	0.21968	0.948362	437	3	-0.0065184	0.25899	0.49337	0.999834	884	3	-0.0065184\	1.94903
NTC_new_802	6	0.53715	0.71069	0.999997	1344	1	0.020141	0.25899	0.49337	0.999834	888	2	0.020141\	1.94903
NTC_new_883	6	0.0456	0.13955	0.882013	293	3	0.028043	0.25899	0.49337	0.999834	893	3	0.028043\	1.94903
NTC_new_9	6	0.0185	0.0674	0.815701	159	4	-0.39447	0.25899	0.49337	0.999834	892	2	-0.39447\	1.94903
NTC_new_158	6	0.20127	0.40378	0.999997	775	3	0.044949	0.26242	0.49669	0.999834	898	3	0.044949\	1.93005
NTC_new_534	6	0.21324	0.41766	0.999997	801	3	-0.0014028	0.26242	0.49669	0.999834	896	3	-0.0014028\	1.93005
NTC_new_546	6	0.60729	0.75471	0.999997	1421	2	0.10897	0.26242	0.49669	0.999834	899	3	0.10897\	1.93005
NTC_new_671	6	0.48259	0.67772	0.999997	1291	1	0.085825	0.26242	0.49669	0.999834	897	3	0.085825\	1.93005
NTC_new_920	6	0.085386	0.21968	0.948362	440	2	0.081842	0.26242	0.49669	0.999834	895	3	0.081842\	1.93005
CUL4A	6	0.24304	0.45132	0.999997	858	3	-0.16795	0.26274	0.49699	0.999834	900	2	-0.16795\	1.92829
DIDO1	6	0.38828	0.60697	0.999997	1163	2	0.26265	0.26548	0.49954	0.999834	901	3	0.26265\	1.91332
NTC_new_1054	6	0.65259	0.78457	0.999997	1484	1	-0.030494	0.2671	0.50124	0.999834	903	2	-0.030494\	1.90455
NTC_new_1076	6	0.014122	0.053101	0.732989	139	2	0.028995	0.2671	0.50124	0.999834	907	2	0.028995\	1.90455
NTC_new_24	6	0.37243	0.59034	0.999997	1125	3	-0.088448	0.2671	0.50124	0.999834	905	2	-0.088448\	1.90455
NTC_new_454	6	0.43507	0.6498	0.999997	1239	1	0.13319	0.2671	0.50124	0.999834	904	3	0.13319\	1.90455
NTC_new_811	6	0.29093	0.50405	0.999997	967	2	-0.042138	0.2671	0.50124	0.999834	902	2	-0.042138\	1.90455
NTC_new_991	6	0.0456	0.13955	0.882013	301	1	0.072805	0.2671	0.50124	0.999834	906	3	0.072805\	1.90455
NTC_new_1015	6	0.2589	0.46915	0.999997	896	2	0.078639	0.26814	0.50227	0.999834	910	3	0.078639\	1.89894
NTC_new_383	6	0.26693	0.47795	0.999997	911	3	0.021548	0.26814	0.50227	0.999834	908	3	0.021548\	1.89894
NTC_new_576	6	0.25095	0.46014	0.999997	878	2	0.082976	0.26814	0.50227	0.999834	909	3	0.082976\	1.89894
TOP2A	6	0.30253	0.51669	0.999997	992	3	-0.17023	0.2688	0.50287	0.999834	911	2	-0.17023\	1.89539
PRDM6	6	0.50676	0.69219	0.999997	1314	2	0.047713	0.27064	0.50464	0.999834	912	3	0.047713\	1.88555
HMGN4	6	0.45083	0.65928	0.999997	1257	2	0.19542	0.27342	0.50717	0.999834	913	3	0.19542\	1.87081
PCNA	6	0.36917	0.58716	0.999997	1116	1	0.12516	0.2746	0.50828	0.999834	914	2	0.12516\	1.8646
NTC_new_1082	6	0.096549	0.24149	0.979689	471	4	-0.24282	0.27475	0.5084	0.999834	921	2	-0.24282\	1.86381
NTC_new_179	6	0.47023	0.67043	0.999997	1274	1	-0.012948	0.27475	0.5084	0.999834	919	2	-0.012948\	1.86381
NTC_new_25	6	0.33775	0.55479	0.999997	1050	2	-0.080068	0.27475	0.5084	0.999834	915	2	-0.080068\	1.86381
NTC_new_625	6	0.13349	0.31018	0.986369	596	4	-0.18429	0.27475	0.5084	0.999834	916	2	-0.18429\	1.86381
NTC_new_656	6	0.9257	0.92777	0.999997	1761	1	-0.06314	0.27475	0.5084	0.999834	918	1	-0.06314\	1.86381
NTC_new_695	6	0.041505	0.13102	0.882013	273	4	-0.37042	0.27475	0.5084	0.999834	920	2	-0.37042\	1.86381
NTC_new_926	6	0.027994	0.096176	0.882013	205	4	-0.35781	0.27475	0.5084	0.999834	917	2	-0.35781\	1.86381
LEO1	6	0.034669	0.11583	0.882013	251	4	-0.51758	0.27627	0.51	0.999834	922	2	-0.51758\	1.85585
NPM2	6	0.48773	0.68076	0.999997	1294	2	0.17349	0.27881	0.51236	0.999834	923	3	0.17349\	1.84265
AURKA	6	0.96077	0.96075	0.999997	1822	0	0.33612	0.27983	0.51337	0.999834	924	3	0.33612\	1.83738
CBX8	6	0.33924	0.55639	0.999997	1058	3	-0.14162	0.28066	0.51418	0.999834	925	2	-0.14162\	1.8331
CHD7	6	0.070682	0.1906	0.932503	394	3	-0.14345	0.28087	0.5144	0.999834	926	3	-0.14345\	1.83203
PADI1	6	0.31534	0.53041	0.999997	1017	3	0.034985	0.28108	0.51459	0.999834	927	3	0.034985\	1.83095
HMGB1	6	0.16927	0.36644	0.996762	712	3	-0.032327	0.28213	0.51557	0.999834	928	3	-0.032327\	1.82557
HBP1	6	0.13564	0.31402	0.986369	606	3	-0.076964	0.28234	0.51575	0.999834	929	3	-0.076964\	1.82449
NTC_new_782	6	0.90017	0.91001	0.999997	1725	1	0.038656	0.28496	0.5183	0.999834	930	3	0.038656\	1.81117
PRM2	6	0.50442	0.6907	0.999997	1313	2	0.19542	0.28523	0.5185	0.999834	931	3	0.19542\	1.8098
HMGN5	6	0.00077461	0.004221	0.588538	13	3	0.058445	0.28589	0.51912	0.999834	932	3	0.058445\	1.80647
ASF1A	6	0.8983	0.90891	0.999997	1722	1	0.15636	0.28638	0.51964	0.999834	933	3	0.15636\	1.804
APOBEC3B	6	0.62451	0.76566	0.999997	1447	1	0.14961	0.28688	0.52016	0.999834	934	3	0.14961\	1.80148
DNAJC2	6	0.4059	0.62469	0.999997	1192	2	0.099348	0.28925	0.52249	0.999834	935	3	0.099348\	1.78961
ZNF217	6	0.79437	0.86322	0.999997	1645	1	0.16005	0.29093	0.52421	0.999834	936	3	0.16005\	1.78126
NTC_new_344	6	0.36569	0.5835	0.999997	1110	3	0.051661	0.29143	0.52461	0.999834	938	3	0.051661\	1.77878
NTC_new_837	6	0.43507	0.6498	0.999997	1241	2	0.090989	0.29143	0.52461	0.999834	937	3	0.090989\	1.77878
NTC_new_1061	6	0.36071	0.57842	0.999997	1097	3	0.05748	0.2944	0.52756	0.999834	942	3	0.05748\	1.76415
NTC_new_1069	6	0.18545	0.3854	0.999997	735	2	-0.00086502	0.2944	0.52756	0.999834	940	2	-0.00086502\	1.76415
NTC_new_226	6	0.39233	0.61119	0.999997	1169	3	0.030044	0.2944	0.52756	0.999834	945	3	0.030044\	1.76415
NTC_new_333	6	0.42749	0.64526	0.999997	1234	2	0.038635	0.2944	0.52756	0.999834	943	3	0.038635\	1.76415
NTC_new_426	6	0.11108	0.26928	0.982617	528	3	-0.22217	0.2944	0.52756	0.999834	939	2	-0.22217\	1.76415
NTC_new_432	6	0.096549	0.24149	0.979689	474	4	-0.27176	0.2944	0.52756	0.999834	944	2	-0.27176\	1.76415
NTC_new_691	6	0.20053	0.40306	0.999997	769	3	-0.03611	0.2944	0.52756	0.999834	941	3	-0.03611\	1.76415
NTC_new_1049	6	0.53715	0.71069	0.999997	1347	1	0.068866	0.29544	0.52856	0.999834	954	3	0.068866\	1.75906
NTC_new_1072	6	0.49688	0.68622	0.999997	1303	2	0.030935	0.29544	0.52856	0.999834	949	3	0.030935\	1.75906
NTC_new_170	6	0.53715	0.71069	0.999997	1345	2	0.01411	0.29544	0.52856	0.999834	953	3	0.01411\	1.75906
NTC_new_301	6	0.0047167	0.021448	0.732989	48	5	-0.47397	0.29544	0.52856	0.999834	952	1	-0.47397\	1.75906
NTC_new_475	6	0.10964	0.26635	0.98132	521	3	-0.19322	0.29544	0.52856	0.999834	950	2	-0.19322\	1.75906
NTC_new_489	6	0.7816	0.85901	0.999997	1636	1	0.05078	0.29544	0.52856	0.999834	951	3	0.05078\	1.75906
NTC_new_590	6	0.0074456	0.030898	0.732989	68	5	-0.34017	0.29544	0.52856	0.999834	948	1	-0.34017\	1.75906
NTC_new_595	6	0.45967	0.66441	0.999997	1261	2	-0.0018881	0.29544	0.52856	0.999834	946	1	-0.0018881\	1.75906
NTC_new_888	6	0.053267	0.15555	0.898904	331	4	-0.25237	0.29544	0.52856	0.999834	947	1	-0.25237\	1.75906
NTC_new_1004	6	0.59275	0.74489	0.999997	1398	2	0.091723	0.29559	0.52868	0.999834	956	3	0.091723\	1.75833
NTC_new_619	6	0.267	0.47804	0.999997	915	1	0.15892	0.29559	0.52868	0.999834	955	3	0.15892\	1.75833
HDAC9	6	0.099678	0.24751	0.98132	481	3	0.049967	0.29834	0.53137	0.999834	957	3	0.049967\	1.74497
DNAJC1	6	0.025299	0.088512	0.882013	191	3	0.090695	0.29884	0.53181	0.999834	958	3	0.090695\	1.74255
ARNTL	6	0.35173	0.56912	0.999997	1084	2	-0.0018062	0.30018	0.53314	0.999834	959	2	-0.0018062\	1.7361
PHF20L1	6	0.32265	0.5384	0.999997	1029	3	-0.13948	0.30123	0.53407	0.999834	960	2	-0.13948\	1.73106
NCOA2	6	0.40145	0.62057	0.999997	1187	3	-0.13316	0.30389	0.53653	0.999834	961	1	-0.13316\	1.71838
NTC_new_853	6	0.38035	0.59855	0.999997	1145	2	0.14834	0.30446	0.5371	0.999834	962	3	0.14834\	1.71568
FAM175A	6	0.62428	0.76551	0.999997	1445	1	0.004027	0.30587	0.5384	0.999834	963	2	0.004027\	1.70901
ZNF541	6	0.17668	0.3753	0.999997	722	3	-0.05824	0.30618	0.53866	0.999834	964	3	-0.05824\	1.70755
CDK7	6	0.4191	0.63823	0.999997	1218	2	0.023247	0.30732	0.53983	0.999834	965	1	0.023247\	1.70219
MYBBP1A	6	0.046646	0.14187	0.882255	310	4	-0.43901	0.30846	0.54089	0.999834	966	2	-0.43901\	1.69684
H3F3C	6	0.048445	0.14568	0.893392	313	3	0.077063	0.30858	0.541	0.999834	967	3	0.077063\	1.69628
CHD8	6	0.056725	0.1627	0.898904	347	3	-0.1437	0.30861	0.54102	0.999834	968	2	-0.1437\	1.69614
PHF6	6	0.41889	0.63804	0.999997	1217	2	0.019985	0.30903	0.54148	0.999834	969	2	0.019985\	1.69418
ZNF687	6	0.32146	0.53714	0.999997	1026	3	0.040688	0.30926	0.54172	0.999834	970	3	0.040688\	1.69311
SMARCE1	6	0.10332	0.25469	0.98132	494	4	-0.42023	0.31112	0.54335	0.999834	971	2	-0.42023\	1.68446
PRKCA	6	0.091125	0.23056	0.97443	456	2	0.062239	0.31145	0.54364	0.999834	972	3	0.062239\	1.68293
KDM2B	6	0.11612	0.27885	0.986369	538	3	0.026368	0.31213	0.5443	0.999834	973	3	0.026368\	1.67978
NTC_new_572	6	0.36833	0.58629	0.999997	1111	2	0.12021	0.31282	0.54503	0.999834	975	3	0.12021\	1.6766
NTC_new_868	6	0.19907	0.4013	0.999997	764	3	-0.066251	0.31282	0.54503	0.999834	976	3	-0.066251\	1.6766
NTC_new_905	6	0.10261	0.25335	0.98132	490	2	0.11908	0.31282	0.54503	0.999834	974	3	0.11908\	1.6766
NTC_new_109	6	0.36294	0.58076	0.999997	1101	3	0.058256	0.31678	0.54867	0.999834	979	3	0.058256\	1.65845
NTC_new_471	6	0.60033	0.74976	0.999997	1410	2	0.0746	0.31678	0.54867	0.999834	977	3	0.0746\	1.65845
NTC_new_699	6	0.055238	0.1597	0.898904	333	3	-0.047081	0.31678	0.54867	0.999834	978	3	-0.047081\	1.65845
RPS6KA5	6	0.34533	0.56275	0.999997	1070	3	0.011942	0.31747	0.54935	0.999834	980	3	0.011942\	1.65531
NTC_new_110	6	0.10261	0.25335	0.98132	492	4	-0.13769	0.31772	0.54958	0.999834	981	1	-0.13769\	1.65417
NTC_new_186	6	0.0022885	0.011547	0.696408	29	3	-0.23341	0.31772	0.54958	0.999834	984	3	-0.23341\	1.65417
NTC_new_319	6	0.14688	0.33374	0.986569	652	3	-0.14834	0.31772	0.54958	0.999834	989	1	-0.14834\	1.65417
NTC_new_367	6	0.33189	0.5484	0.999997	1043	3	-0.0092736	0.31772	0.54958	0.999834	986	3	-0.0092736\	1.65417
NTC_new_374	6	0.60033	0.74976	0.999997	1405	2	-0.067934	0.31772	0.54958	0.999834	987	2	-0.067934\	1.65417
NTC_new_518	6	0.47023	0.67043	0.999997	1271	2	0.085899	0.31772	0.54958	0.999834	988	3	0.085899\	1.65417
NTC_new_52	6	0.21792	0.42278	0.999997	807	2	-0.0092812	0.31772	0.54958	0.999834	982	2	-0.0092812\	1.65417
NTC_new_602	6	0.022253	0.079323	0.868979	176	5	-0.41463	0.31772	0.54958	0.999834	983	1	-0.41463\	1.65417
NTC_new_994	6	0.26693	0.47795	0.999997	908	3	-0.060199	0.31772	0.54958	0.999834	985	3	-0.060199\	1.65417
PHC3	6	0.22094	0.42614	0.999997	810	2	0.0175	0.31874	0.55066	0.999834	990	2	0.0175\	1.64955
BRMS1L	6	0.28655	0.49925	0.999997	963	3	0.0018389	0.31937	0.55123	0.999834	991	3	0.0018389\	1.6467
PRDM7	6	0.62679	0.76724	0.999997	1451	1	0.10436	0.31958	0.55143	0.999834	992	2	0.10436\	1.64575
PHRF1	6	0.34671	0.56414	0.999997	1076	3	-0.017336	0.32197	0.55379	0.999834	993	3	-0.017336\	1.635
RPS6KA3	6	0.24792	0.45677	0.999997	869	3	-0.019141	0.32299	0.55478	0.999834	994	3	-0.019141\	1.63044
MSL3	6	0.028261	0.096929	0.882013	206	4	-0.36565	0.32464	0.55635	0.999834	995	2	-0.36565\	1.62309
NTC_new_1011	6	0.014122	0.053101	0.732989	135	2	-0.043182	0.32634	0.55795	0.999834	997	2	-0.043182\	1.61555
NTC_new_628	6	0.63454	0.7724	0.999997	1457	2	-0.074216	0.32634	0.55795	0.999834	999	2	-0.074216\	1.61555
NTC_new_797	6	0.44103	0.65334	0.999997	1245	2	-0.10412	0.32634	0.55795	0.999834	996	2	-0.10412\	1.61555
NTC_new_93	6	0.72882	0.83785	0.999997	1592	2	0.107	0.32634	0.55795	0.999834	998	3	0.107\	1.61555
NTC_new_122	6	0.40957	0.62863	0.999997	1199	2	0.087412	0.32872	0.56009	0.999834	1001	3	0.087412\	1.60507
NTC_new_381	6	0.25334	0.46291	0.999997	885	1	0.068686	0.32872	0.56009	0.999834	1002	3	0.068686\	1.60507
NTC_new_510	6	0.69867	0.81599	0.999997	1546	2	0.11467	0.32872	0.56009	0.999834	1003	3	0.11467\	1.60507
NTC_new_694	6	0.1453	0.331	0.986369	644	2	0.051709	0.32872	0.56009	0.999834	1000	3	0.051709\	1.60507
BRD4	6	0.037873	0.1229	0.882013	266	2	0.13162	0.3293	0.56065	0.999834	1004	3	0.13162\	1.60253
DTX3L	6	0.059713	0.16848	0.898904	357	4	-0.40738	0.32994	0.56126	0.999834	1005	2	-0.40738\	1.59972
NTC_new_1003	6	0.64821	0.78163	0.999997	1475	2	0.040455	0.33002	0.56133	0.999834	1008	3	0.040455\	1.59937
NTC_new_43	6	0.056202	0.16164	0.898904	340	4	-0.26329	0.33002	0.56133	0.999834	1006	2	-0.26329\	1.59937
NTC_new_818	6	0.87677	0.89685	0.999997	1707	1	0.15524	0.33002	0.56133	0.999834	1007	3	0.15524\	1.59937
NTC_new_975	6	0.16797	0.36495	0.99551	710	3	-0.16208	0.33002	0.56133	0.999834	1009	2	-0.16208\	1.59937
PPP4R2	6	0.11425	0.27525	0.986369	531	2	0.1958	0.3324	0.56394	0.999834	1010	3	0.1958\	1.58901
NTC_new_183	6	0.97003	0.96977	0.999997	1835	0	0.044237	0.3329	0.5645	0.999834	1013	2	0.044237\	1.58684
NTC_new_663	6	0.11717	0.28073	0.986369	543	4	-0.20351	0.3329	0.5645	0.999834	1012	2	-0.20351\	1.58684
NTC_new_852	6	0.38035	0.59855	0.999997	1146	1	0.12259	0.3329	0.5645	0.999834	1011	3	0.12259\	1.58684
NTC_new_964	6	0.2214	0.4267	0.999997	817	2	0.099449	0.3329	0.5645	0.999834	1014	3	0.099449\	1.58684
NTC_new_1053	6	0.1152	0.27708	0.986369	536	3	0.049481	0.33438	0.56597	0.999834	1017	3	0.049481\	1.58044
NTC_new_416	6	0.22892	0.43523	0.999997	832	3	0.0080105	0.33438	0.56597	0.999834	1016	3	0.0080105\	1.58044
NTC_new_568	6	0.52921	0.70588	0.999997	1334	2	0.1059	0.33438	0.56597	0.999834	1015	3	0.1059\	1.58044
TTK	6	0.40025	0.61935	0.999997	1186	2	-0.033392	0.33536	0.56689	0.999834	1018	2	-0.033392\	1.57622
IKZF3	6	0.074785	0.19862	0.936887	409	3	0.0052605	0.33601	0.56741	0.999834	1019	3	0.0052605\	1.57342
C11ORF30	6	0.91382	0.91902	0.999997	1741	1	0.083786	0.33628	0.56764	0.999834	1020	3	0.083786\	1.57227
KAT2A	6	0.3398	0.557	0.999997	1060	3	-0.01368	0.33683	0.56816	0.999834	1021	3	-0.01368\	1.56991
DOT1L	6	0.64504	0.77945	0.999997	1473	1	0.029466	0.33757	0.56883	0.999834	1022	2	0.029466\	1.56674
MAPKAPK3	6	0.13367	0.3105	0.986369	600	3	-0.14785	0.3394	0.57059	0.999834	1023	2	-0.14785\	1.55894
NTC_new_735	6	0.52921	0.70588	0.999997	1335	2	0.027304	0.33967	0.57084	0.999834	1024	3	0.027304\	1.55779
NTC_new_822	6	0.017213	0.063397	0.791025	155	4	-0.49651	0.33967	0.57084	0.999834	1025	2	-0.49651\	1.55779
NTC_new_869	6	0.18899	0.38945	0.999997	744	2	0.063975	0.33967	0.57084	0.999834	1026	3	0.063975\	1.55779
HIST1H2BK	6	0.25549	0.46534	0.999997	892	2	0.010033	0.342	0.57307	0.999834	1027	3	0.010033\	1.54793
NTC_new_1036	6	0.70062	0.81737	0.999997	1554	1	0.13454	0.34343	0.57441	0.999834	1030	3	0.13454\	1.54191
NTC_new_114	6	0.56803	0.72975	0.999997	1373	2	0.053525	0.34343	0.57441	0.999834	1028	3	0.053525\	1.54191
NTC_new_484	6	0.94478	0.94481	0.999997	1794	1	0.093343	0.34343	0.57441	0.999834	1029	3	0.093343\	1.54191
NTC_new_72	6	0.089265	0.22712	0.965368	452	2	0.057842	0.34343	0.57441	0.999834	1033	3	0.057842\	1.54191
NTC_new_817	6	0.27996	0.49212	0.999997	940	3	-0.031821	0.34343	0.57441	0.999834	1031	3	-0.031821\	1.54191
NTC_new_866	6	0.61095	0.75698	0.999997	1426	2	0.10823	0.34343	0.57441	0.999834	1032	3	0.10823\	1.54191
NTC_new_297	6	0.38035	0.59855	0.999997	1142	2	0.049527	0.34527	0.57601	0.999834	1034	2	0.049527\	1.5342
NTC_new_747	6	0.31238	0.52729	0.999997	1010	3	-0.041508	0.34527	0.57601	0.999834	1035	3	-0.041508\	1.5342
NTC_new_1032	6	0.40757	0.62656	0.999997	1196	3	-0.056513	0.34577	0.57643	0.999834	1036	2	-0.056513\	1.53212
NTC_new_150	6	0.06657	0.18214	0.912597	384	4	-0.32013	0.34577	0.57643	0.999834	1039	1	-0.32013\	1.53212
NTC_new_223	6	0.0015014	0.0076868	0.588538	24	4	-0.64212	0.34577	0.57643	0.999834	1038	2	-0.64212\	1.53212
NTC_new_347	6	0.26693	0.47795	0.999997	912	3	-0.22859	0.34577	0.57643	0.999834	1037	2	-0.22859\	1.53212
NTC_new_573	6	0.38035	0.59855	0.999997	1147	2	-0.043982	0.34577	0.57643	0.999834	1040	2	-0.043982\	1.53212
YWHAE	6	0.091598	0.23143	0.97443	457	4	-0.33472	0.34813	0.57847	0.999834	1041	2	-0.33472\	1.5223
NTC_new_503	6	0.63454	0.7724	0.999997	1460	2	0.13303	0.34836	0.57867	0.999834	1042	3	0.13303\	1.52135
HIST1H2BI	6	0.10441	0.25672	0.98132	498	3	-0.11288	0.35004	0.58021	0.999834	1043	3	-0.11288\	1.51441
RB1	6	0.094935	0.23833	0.979689	468	3	-0.055182	0.35065	0.58073	0.999834	1044	3	-0.055182\	1.5119
SETDB2	6	0.68562	0.8072	0.999997	1528	2	0.11735	0.35122	0.58122	0.999834	1045	3	0.11735\	1.50955
NCOA1	6	0.54925	0.71821	0.999997	1359	2	0.02563	0.35137	0.58139	0.999834	1046	1	0.02563\	1.50894
HIST1H2AK	6	0.0067436	0.028472	0.732989	62	3	-0.28357	0.35152	0.58152	0.999834	1047	3	-0.28357\	1.50832
TDRKH	6	0.38363	0.60208	0.999997	1154	2	0.036198	0.35209	0.58205	0.999834	1048	2	0.036198\	1.50598
RAD51	6	0.13675	0.31604	0.986369	615	3	-0.82475	0.35245	0.58243	0.999834	1049	2	-0.82475\	1.50451
NTC_new_1009	6	0.1453	0.331	0.986369	635	1	0.12284	0.35513	0.58488	0.999834	1050	3	0.12284\	1.49358
NTC_new_1019	6	0.88459	0.90093	0.999997	1712	1	0.023783	0.35604	0.58558	0.999834	1051	2	0.023783\	1.48989
NTC_new_246	6	0.1652	0.36178	0.992465	705	3	-0.18754	0.35604	0.58558	0.999834	1052	1	-0.18754\	1.48989
NTC_new_251	6	0.1305	0.30481	0.986369	590	3	-0.24672	0.35604	0.58558	0.999834	1054	1	-0.24672\	1.48989
NTC_new_337	6	0.18899	0.38945	0.999997	749	1	0.075769	0.35604	0.58558	0.999834	1053	3	0.075769\	1.48989
NTC_new_505	6	0.12678	0.29826	0.986369	581	1	0.059397	0.35604	0.58558	0.999834	1055	2	0.059397\	1.48989
NTC_new_521	6	0.0030272	0.014982	0.696408	41	4	-0.60765	0.35604	0.58558	0.999834	1056	2	-0.60765\	1.48989
NTC_new_1062	6	0.92887	0.9304	0.999997	1763	1	0.042224	0.35628	0.58577	0.999834	1057	3	0.042224\	1.48892
NTC_new_361	6	0.34921	0.56653	0.999997	1078	2	0.10803	0.35628	0.58577	0.999834	1058	3	0.10803\	1.48892
E2F6	6	0.67021	0.79698	0.999997	1511	2	0.053038	0.35766	0.5871	0.999834	1059	3	0.053038\	1.48334
SMYD5	6	0.036872	0.12079	0.882013	260	3	0.051752	0.3587	0.58811	0.999834	1060	3	0.051752\	1.47915
DZIP3	6	0.37603	0.59418	0.999997	1138	3	-0.085771	0.36032	0.5896	0.999834	1061	2	-0.085771\	1.47265
NTC_new_130	6	0.39867	0.61771	0.999997	1180	2	0.10323	0.36193	0.59105	0.999834	1062	3	0.10323\	1.46622
NTC_new_274	6	0.26731	0.47834	0.999997	923	2	0.13933	0.36193	0.59105	0.999834	1064	3	0.13933\	1.46622
NTC_new_896	6	0.97201	0.97165	0.999997	1842	0	0.15167	0.36193	0.59105	0.999834	1063	3	0.15167\	1.46622
TRIM24	6	0.24839	0.45733	0.999997	871	3	-0.12934	0.36246	0.59154	0.999834	1065	2	-0.12934\	1.46411
CTCFL	6	0.88962	0.90377	0.999997	1715	1	-0.038821	0.36281	0.59189	0.999834	1066	2	-0.038821\	1.46271
NTC_new_1056	6	0.42749	0.64526	0.999997	1232	2	-0.10288	0.3641	0.5932	0.999834	1071	2	-0.10288\	1.45759
NTC_new_1060	6	0.081198	0.21145	0.942248	430	4	-0.22224	0.3641	0.5932	0.999834	1072	2	-0.22224\	1.45759
NTC_new_388	6	0.085386	0.21968	0.948362	447	2	-0.068925	0.3641	0.5932	0.999834	1067	2	-0.068925\	1.45759
NTC_new_535	6	0.12678	0.29826	0.986369	578	2	-0.0034143	0.3641	0.5932	0.999834	1069	2	-0.0034143\	1.45759
NTC_new_808	6	0.43507	0.6498	0.999997	1242	1	0.10257	0.3641	0.5932	0.999834	1068	3	0.10257\	1.45759
NTC_new_816	6	0.97201	0.97165	0.999997	1841	0	0.064315	0.3641	0.5932	0.999834	1070	2	0.064315\	1.45759
NTC_new_94	6	0.1907	0.39146	0.999997	752	3	-0.13606	0.3641	0.5932	0.999834	1073	2	-0.13606\	1.45759
MLLT10	6	0.33532	0.55234	0.999997	1047	3	-0.1086	0.36494	0.59384	0.999834	1074	2	-0.1086\	1.45427
NTC_new_220	6	0.014122	0.053101	0.732989	115	3	-0.19299	0.36621	0.59494	0.999834	1075	3	-0.19299\	1.44926
NTC_new_384	6	0.089265	0.22712	0.965368	454	2	0.040471	0.36621	0.59494	0.999834	1076	3	0.040471\	1.44926
SETDB1	6	0.2849	0.49751	0.999997	961	3	-0.11831	0.36706	0.59571	0.999834	1077	2	-0.11831\	1.44591
KAT7	6	0.006677	0.028206	0.732989	61	4	-0.7896	0.36864	0.5972	0.999834	1078	2	-0.7896\	1.43972
JADE3	6	0.32761	0.54376	0.999997	1039	2	0.080981	0.36901	0.59753	0.999834	1079	3	0.080981\	1.43827
ATR	6	0.50058	0.68836	0.999997	1308	2	0.151	0.36989	0.59829	0.999834	1080	3	0.151\	1.43483
NTC_new_244	6	0.25037	0.45953	0.999997	872	3	-0.11685	0.37233	0.60038	0.999834	1081	1	-0.11685\	1.42535
NTC_new_722	6	0.18545	0.3854	0.999997	734	2	0.037159	0.37233	0.60038	0.999834	1082	3	0.037159\	1.42535
NTC_new_998	6	0.055238	0.1597	0.898904	336	4	-0.25678	0.37233	0.60038	0.999834	1083	1	-0.25678\	1.42535
NTC_new_554	6	0.25985	0.4702	0.999997	897	3	-0.04124	0.37357	0.60158	0.999834	1085	3	-0.04124\	1.42055
NTC_new_61	6	0.21324	0.41766	0.999997	800	3	-0.033267	0.37357	0.60158	0.999834	1086	3	-0.033267\	1.42055
NTC_new_897	6	0.014122	0.053101	0.732989	128	1	0.14167	0.37357	0.60158	0.999834	1084	3	0.14167\	1.42055
NTC_new_184	6	0.66094	0.79033	0.999997	1499	2	-0.0052845	0.3754	0.60327	0.999834	1087	2	-0.0052845\	1.4135
PADI3	6	0.47803	0.67509	0.999997	1285	2	0.13608	0.37691	0.60478	0.999834	1088	3	0.13608\	1.40771
ATAD2	6	0.89729	0.90833	0.999997	1721	1	0.15945	0.37744	0.60528	0.999834	1089	3	0.15945\	1.40568
TOP2B	6	0.17148	0.36906	0.99966	715	2	0.14011	0.37849	0.60614	0.999834	1090	3	0.14011\	1.40167
ARID4A	6	0.9726	0.9722	0.999997	1847	0	0.082145	0.38078	0.60826	0.999834	1091	3	0.082145\	1.39297
NEK6	6	0.37163	0.58956	0.999997	1121	2	-0.087914	0.38089	0.60833	0.999834	1092	2	-0.087914\	1.39255
PHF20	6	0.65725	0.78773	0.999997	1494	2	-0.085958	0.38131	0.60872	0.999834	1093	2	-0.085958\	1.39096
HIST1H4D	6	0.65338	0.78505	0.999997	1487	2	0.094304	0.38215	0.60952	0.999834	1094	3	0.094304\	1.38779
ATXN7	6	0.0582	0.16547	0.898904	351	3	-0.2033	0.38257	0.60995	0.999834	1095	2	-0.2033\	1.3862
NTC_new_1090	6	0.3873	0.60603	0.999997	1161	3	-0.17177	0.38312	0.61051	0.999834	1099	2	-0.17177\	1.38413
NTC_new_314	6	0.16194	0.35792	0.989288	698	2	-0.0027788	0.38312	0.61051	0.999834	1101	2	-0.0027788\	1.38413
NTC_new_57	6	0.0456	0.13955	0.882013	291	3	-0.1552	0.38312	0.61051	0.999834	1102	3	-0.1552\	1.38413
NTC_new_641	6	0.26693	0.47795	0.999997	910	3	-0.17687	0.38312	0.61051	0.999834	1100	2	-0.17687\	1.38413
NTC_new_781	6	0.15642	0.35028	0.989288	681	4	-0.22146	0.38312	0.61051	0.999834	1096	2	-0.22146\	1.38413
NTC_new_871	6	0.27377	0.48525	0.999997	937	3	-0.13402	0.38312	0.61051	0.999834	1098	1	-0.13402\	1.38413
NTC_new_990	6	0.49936	0.68772	0.999997	1304	1	-0.040724	0.38312	0.61051	0.999834	1097	1	-0.040724\	1.38413
NTC_new_1078	6	0.61645	0.76041	0.999997	1436	1	0.122	0.3836	0.61094	0.999834	1107	3	0.122\	1.38233
NTC_new_271	6	0.81816	0.87151	0.999997	1658	1	0.075376	0.3836	0.61094	0.999834	1108	3	0.075376\	1.38233
NTC_new_403	6	0.2589	0.46915	0.999997	895	3	0.019967	0.3836	0.61094	0.999834	1106	3	0.019967\	1.38233
NTC_new_461	6	0.24571	0.45431	0.999997	864	3	-0.023359	0.3836	0.61094	0.999834	1103	3	-0.023359\	1.38233
NTC_new_581	6	0.64154	0.77698	0.999997	1468	2	0.13527	0.3836	0.61094	0.999834	1104	3	0.13527\	1.38233
NTC_new_840	6	0.37243	0.59034	0.999997	1126	3	0.029168	0.3836	0.61094	0.999834	1105	3	0.029168\	1.38233
MYO1C	6	0.13597	0.31456	0.986369	608	2	0.032015	0.38363	0.61097	0.999834	1109	3	0.032015\	1.38221
HMGA2	6	0.41784	0.63697	0.999997	1216	2	0.011644	0.38426	0.61155	0.999834	1110	2	0.011644\	1.37985
TET2	6	0.08686	0.22254	0.954326	450	3	-0.22523	0.387	0.61418	0.999834	1111	3	-0.22523\	1.36959
NCOR1	6	0.12737	0.29936	0.986369	584	3	-0.1054	0.38794	0.61495	0.999834	1112	3	-0.1054\	1.36609
SCML2	6	0.41672	0.63567	0.999997	1213	3	-0.053538	0.38828	0.6153	0.999834	1113	2	-0.053538\	1.36483
NTC_new_651	6	0.1091	0.26539	0.98132	509	2	0.024862	0.3888	0.61581	0.999834	1114	3	0.024862\	1.3629
NTC_new_872	6	0.50348	0.69013	0.999997	1311	2	0.068283	0.3888	0.61581	0.999834	1115	3	0.068283\	1.3629
NTC_new_1055	6	0.12678	0.29826	0.986369	577	3	-0.076254	0.39016	0.61701	0.999834	1118	2	-0.076254\	1.35786
NTC_new_414	6	0.0022885	0.011547	0.696408	30	4	-0.81942	0.39016	0.61701	0.999834	1119	2	-0.81942\	1.35786
NTC_new_772	6	0.041505	0.13102	0.882013	274	4	-0.35553	0.39016	0.61701	0.999834	1117	2	-0.35553\	1.35786
NTC_new_847	6	0.17301	0.37091	0.999997	717	3	-0.060026	0.39016	0.61701	0.999834	1116	2	-0.060026\	1.35786
UBR5	6	0.17983	0.37901	0.999997	729	3	-0.022586	0.39083	0.61758	0.999834	1120	3	-0.022586\	1.35539
NTC_new_261	6	0.078123	0.20526	0.940953	416	4	-0.24747	0.39341	0.61999	0.999834	1124	1	-0.24747\	1.34589
NTC_new_37	6	0.45967	0.66441	0.999997	1264	2	-0.0794	0.39341	0.61999	0.999834	1121	1	-0.0794\	1.34589
NTC_new_950	6	0.1091	0.26539	0.98132	511	4	-0.21007	0.39341	0.61999	0.999834	1122	2	-0.21007\	1.34589
NTC_new_989	6	0.19907	0.4013	0.999997	765	2	0.075837	0.39341	0.61999	0.999834	1123	2	0.075837\	1.34589
NTC_new_308	6	0.90408	0.91253	0.999997	1732	1	0.15524	0.39392	0.62049	0.999834	1127	3	0.15524\	1.34403
NTC_new_583	6	0.48259	0.67772	0.999997	1290	1	0.1549	0.39392	0.62049	0.999834	1128	3	0.1549\	1.34403
NTC_new_603	6	0.80004	0.86507	0.999997	1649	1	0.088733	0.39392	0.62049	0.999834	1126	3	0.088733\	1.34403
NTC_new_761	6	0.27377	0.48525	0.999997	935	2	0.16093	0.39392	0.62049	0.999834	1125	3	0.16093\	1.34403
HIST1H3A	6	0.16913	0.36623	0.996762	711	3	-0.086951	0.39667	0.62302	0.999834	1129	3	-0.086951\	1.33399
NTC_new_14	6	0.018366	0.066996	0.815701	157	3	-0.29762	0.39731	0.62369	0.999834	1134	2	-0.29762\	1.33166
NTC_new_288	6	0.056202	0.16164	0.898904	345	4	-0.39225	0.39731	0.62369	0.999834	1130	2	-0.39225\	1.33166
NTC_new_502	6	0.20127	0.40378	0.999997	772	3	-0.11612	0.39731	0.62369	0.999834	1133	2	-0.11612\	1.33166
NTC_new_86	6	0.014122	0.053101	0.732989	134	4	-0.19777	0.39731	0.62369	0.999834	1132	2	-0.19777\	1.33166
NTC_new_906	6	0.034756	0.11602	0.882013	253	3	-0.27183	0.39731	0.62369	0.999834	1131	2	-0.27183\	1.33166
H2AFY2	6	0.3235	0.53932	0.999997	1032	3	-0.011958	0.39808	0.62436	0.999834	1135	3	-0.011958\	1.32887
SIRT1	6	0.0077532	0.032014	0.732989	70	3	-0.30808	0.39816	0.62444	0.999834	1136	2	-0.30808\	1.32858
HIST3H3	6	0.24623	0.4548	0.999997	867	2	0.082216	0.39897	0.6252	0.999834	1137	3	0.082216\	1.32565
USP16	6	0.37202	0.58993	0.999997	1123	2	0.17829	0.39985	0.62602	0.999834	1138	3	0.17829\	1.32247
NCOA6	6	0.42681	0.64488	0.999997	1231	2	0.053403	0.40003	0.62618	0.999834	1139	3	0.053403\	1.32182
HIST1H2BC	6	0.24477	0.45322	0.999997	862	2	0.066829	0.40153	0.62757	0.999834	1140	2	0.066829\	1.31642
BAZ1A	6	0.29313	0.50648	0.999997	974	3	0.020532	0.4018	0.62783	0.999834	1141	3	0.020532\	1.31545
NTC_new_62	6	0.2132	0.41763	0.999997	797	2	0.027304	0.40319	0.62896	0.999834	1142	3	0.027304\	1.31047
NTC_new_692	6	0.267	0.47804	0.999997	920	3	-0.01997	0.40319	0.62896	0.999834	1144	3	-0.01997\	1.31047
NTC_new_895	6	0.055238	0.1597	0.898904	337	3	-0.16905	0.40319	0.62896	0.999834	1143	2	-0.16905\	1.31047
SIRT2	6	0.16078	0.35646	0.989288	687	3	-0.099028	0.40322	0.62897	0.999834	1145	3	-0.099028\	1.31036
HIST1H3D	6	0.71059	0.82469	0.999997	1564	1	-0.049176	0.40456	0.6301	0.999834	1146	1	-0.049176\	1.30557
NTC_new_252	6	0.49136	0.68303	0.999997	1298	2	0.027304	0.40482	0.63032	0.999834	1148	3	0.027304\	1.30465
NTC_new_393	6	0.94139	0.94133	0.999997	1786	1	0.035196	0.40482	0.63032	0.999834	1147	3	0.035196\	1.30465
NTC_new_862	6	0.2214	0.4267	0.999997	819	1	0.11964	0.40482	0.63032	0.999834	1149	3	0.11964\	1.30465
SMYD2	6	0.54898	0.71809	0.999997	1358	2	-0.020013	0.4059	0.63117	0.999834	1150	2	-0.020013\	1.3008
UBE2E1	6	0.36458	0.58244	0.999997	1104	2	0.040418	0.40724	0.6325	0.999834	1151	3	0.040418\	1.29605
NTC_new_232	6	0.30555	0.51996	0.999997	996	3	-0.15059	0.41157	0.6364	0.999834	1154	2	-0.15059\	1.28079
NTC_new_400	6	0.18678	0.38692	0.999997	738	3	-0.19214	0.41157	0.6364	0.999834	1152	1	-0.19214\	1.28079
NTC_new_498	6	0.267	0.47804	0.999997	914	2	-0.08367	0.41157	0.6364	0.999834	1153	2	-0.08367\	1.28079
NTC_new_665	6	0.0093373	0.037267	0.732989	78	3	-0.22284	0.41157	0.6364	0.999834	1155	2	-0.22284\	1.28079
NTC_new_944	6	0.49688	0.68622	0.999997	1302	2	0.028661	0.41157	0.6364	0.999834	1156	2	0.028661\	1.28079
NTC_new_317	6	0.52921	0.70588	0.999997	1332	2	0.10862	0.4121	0.63687	0.999834	1159	3	0.10862\	1.27893
NTC_new_492	6	0.0093373	0.037267	0.732989	77	3	0.019967	0.4121	0.63687	0.999834	1157	3	0.019967\	1.27893
NTC_new_566	6	0.61971	0.76244	0.999997	1441	2	0.059185	0.4121	0.63687	0.999834	1158	3	0.059185\	1.27893
NTC_new_1038	6	0.27377	0.48525	0.999997	936	2	0.0019545	0.41293	0.63767	0.999834	1162	2	0.0019545\	1.27603
NTC_new_205	6	0.0594	0.16778	0.898904	354	2	-0.040765	0.41293	0.63767	0.999834	1161	2	-0.040765\	1.27603
NTC_new_632	6	0.1453	0.331	0.986369	636	3	-0.092486	0.41293	0.63767	0.999834	1163	2	-0.092486\	1.27603
NTC_new_712	6	0.48985	0.68209	0.999997	1296	2	-0.030358	0.41293	0.63767	0.999834	1160	2	-0.030358\	1.27603
LRWD1	6	0.40675	0.62567	0.999997	1193	2	0.090457	0.41512	0.63966	0.999834	1164	3	0.090457\	1.2684
SUV420H2	6	0.071876	0.1929	0.932503	398	3	-0.082999	0.4153	0.63975	0.999834	1165	3	-0.082999\	1.26777
L3MBTL4	6	0.0018066	0.0092022	0.659149	27	4	-0.5345	0.4168	0.64114	0.999834	1166	2	-0.5345\	1.26257
ACTL6B	6	0.73144	0.83974	0.999997	1595	1	0.050763	0.41686	0.64118	0.999834	1167	3	0.050763\	1.26237
PRDM4	6	0.6953	0.81371	0.999997	1538	2	0.1419	0.41725	0.64157	0.999834	1168	3	0.1419\	1.26102
KDM6B	6	0.62404	0.76533	0.999997	1443	2	0.029989	0.41752	0.64188	0.999834	1169	2	0.029989\	1.26008
SIRT6	6	0.048568	0.14597	0.893392	315	2	0.093763	0.41903	0.64325	0.999834	1170	3	0.093763\	1.25487
SMN1	6	0.58982	0.7429	0.999997	1397	2	0.064988	0.41948	0.64371	0.999834	1171	3	0.064988\	1.25333
NTC_new_425	6	0.056202	0.16164	0.898904	342	4	-0.35483	0.42424	0.64824	0.999834	1173	2	-0.35483\	1.23705
NTC_new_618	6	0.36071	0.57842	0.999997	1093	3	-0.092914	0.42424	0.64824	0.999834	1176	2	-0.092914\	1.23705
NTC_new_633	6	0.12678	0.29826	0.986369	573	3	-0.19018	0.42424	0.64824	0.999834	1172	2	-0.19018\	1.23705
NTC_new_78	6	0.26731	0.47834	0.999997	922	2	-0.10805	0.42424	0.64824	0.999834	1174	1	-0.10805\	1.23705
NTC_new_909	6	0.33189	0.5484	0.999997	1045	3	-0.10412	0.42424	0.64824	0.999834	1175	1	-0.10412\	1.23705
NTC_new_917	6	0.85331	0.88593	0.999997	1692	1	-0.016569	0.42424	0.64824	0.999834	1177	2	-0.016569\	1.23705
NTC_new_509	6	0.90017	0.91001	0.999997	1726	1	0.026565	0.42464	0.64867	0.999834	1180	3	0.026565\	1.23569
NTC_new_800	6	0.12678	0.29826	0.986369	576	2	0.042062	0.42464	0.64867	0.999834	1179	3	0.042062\	1.23569
NTC_new_979	6	0.84737	0.88339	0.999997	1688	1	0.055961	0.42464	0.64867	0.999834	1178	3	0.055961\	1.23569
NTC_new_748	6	0.69867	0.81599	0.999997	1549	2	-0.022307	0.42546	0.64939	0.999834	1181	2	-0.022307\	1.2329
ZMYM2	6	0.31472	0.52977	0.999997	1016	2	0.098299	0.42776	0.65147	0.999834	1182	3	0.098299\	1.22513
DNMT3A	6	0.026893	0.092992	0.882013	197	2	-0.0032752	0.42827	0.65201	0.999834	1183	2	-0.0032752\	1.22341
HIST1H4F	6	0.14286	0.32674	0.986369	630	4	-0.16674	0.4296	0.65318	0.999834	1184	2	-0.16674\	1.21893
NTC_new_259	6	0.28301	0.4954	0.999997	951	2	0.0091491	0.43007	0.65363	0.999834	1188	3	0.0091491\	1.21736
NTC_new_491	6	0.2214	0.4267	0.999997	812	1	0.10164	0.43007	0.65363	0.999834	1187	3	0.10164\	1.21736
NTC_new_499	6	0.97379	0.97348	0.999997	1850	0	0.11464	0.43007	0.65363	0.999834	1185	3	0.11464\	1.21736
NTC_new_565	6	0.15669	0.35075	0.989288	683	3	-0.061377	0.43007	0.65363	0.999834	1186	3	-0.061377\	1.21736
NTC_new_715	6	0.35659	0.57397	0.999997	1090	2	0.049319	0.43007	0.65363	0.999834	1189	3	0.049319\	1.21736
NTC_new_177	6	0.62939	0.76895	0.999997	1455	1	0.11451	0.43066	0.65419	0.999834	1190	3	0.11451\	1.21538
NTC_new_236	6	0.057722	0.16462	0.898904	350	4	-0.29667	0.43066	0.65419	0.999834	1191	2	-0.29667\	1.21538
NTC_new_736	6	0.014122	0.053101	0.732989	126	2	-0.079192	0.43066	0.65419	0.999834	1192	2	-0.079192\	1.21538
H1FNT	6	0.16158	0.35748	0.989288	689	3	-0.045629	0.43221	0.65558	0.999834	1193	3	-0.045629\	1.2102
CHD5	6	0.91541	0.92023	0.999997	1745	1	0.12391	0.43311	0.65641	0.999834	1194	3	0.12391\	1.20719
PHF10	6	0.1	0.24809	0.98132	484	3	-0.06061	0.43471	0.65788	0.999834	1195	3	-0.06061\	1.20187
NTC_new_287	6	0.60033	0.74976	0.999997	1407	2	-0.094266	0.43491	0.65813	0.999834	1197	1	-0.094266\	1.20121
NTC_new_324	6	0.18899	0.38945	0.999997	747	3	-0.14361	0.43491	0.65813	0.999834	1196	2	-0.14361\	1.20121
UBE2D1	6	0.78435	0.85986	0.999997	1639	1	0.1124	0.43578	0.65902	0.999834	1198	3	0.1124\	1.19833
NTC_new_197	6	0.86403	0.89074	0.999997	1697	1	0.079053	0.4374	0.66043	0.999834	1202	2	0.079053\	1.19297
NTC_new_468	6	0.94286	0.94275	0.999997	1790	1	-0.011785	0.4374	0.66043	0.999834	1199	2	-0.011785\	1.19297
NTC_new_612	6	0.10495	0.25769	0.98132	501	4	-0.23395	0.4374	0.66043	0.999834	1200	2	-0.23395\	1.19297
NTC_new_703	6	0.39867	0.61771	0.999997	1181	2	-0.073304	0.4374	0.66043	0.999834	1201	2	-0.073304\	1.19297
NTC_new_1058	6	0.16194	0.35792	0.989288	694	3	-0.03418	0.43881	0.66176	0.999834	1203	3	-0.03418\	1.18833
NTC_new_152	6	0.70696	0.82196	0.999997	1560	2	0.024086	0.43881	0.66176	0.999834	1206	3	0.024086\	1.18833
NTC_new_210	6	0.25095	0.46014	0.999997	880	3	0.020353	0.43881	0.66176	0.999834	1208	3	0.020353\	1.18833
NTC_new_313	6	0.1453	0.331	0.986369	634	2	0.11244	0.43881	0.66176	0.999834	1205	3	0.11244\	1.18833
NTC_new_322	6	0.97201	0.97165	0.999997	1843	0	0.0909	0.43881	0.66176	0.999834	1204	3	0.0909\	1.18833
NTC_new_931	6	0.90408	0.91253	0.999997	1731	1	0.062936	0.43881	0.66176	0.999834	1209	3	0.062936\	1.18833
NTC_new_951	6	0.18899	0.38945	0.999997	745	2	0.091052	0.43881	0.66176	0.999834	1207	3	0.091052\	1.18833
NTC_new_96	6	0.37572	0.59388	0.999997	1135	2	0.09995	0.43881	0.66176	0.999834	1210	3	0.09995\	1.18833
HDGFL1	6	0.12845	0.30125	0.986369	587	3	-0.15581	0.44051	0.66334	0.999834	1211	2	-0.15581\	1.18275
ING2	6	0.013008	0.049318	0.732989	93	3	-0.33964	0.44083	0.66371	0.999834	1212	2	-0.33964\	1.18171
NAT10	6	0.35001	0.56734	0.999997	1083	3	-0.0092178	0.44382	0.66636	0.999834	1213	3	-0.0092178\	1.17195
UCHL5	6	0.00016806	0.0010572	0.484441	2	4	-0.77462	0.44402	0.66659	0.999834	1214	2	-0.77462\	1.1713
NTC_new_1074	6	0.092875	0.23406	0.97443	462	2	0.076578	0.44408	0.66664	0.999834	1217	3	0.076578\	1.17111
NTC_new_36	6	0.014122	0.053101	0.732989	111	3	-0.047391	0.44408	0.66664	0.999834	1215	3	-0.047391\	1.17111
NTC_new_812	6	0.16249	0.35859	0.989288	701	3	-0.0072483	0.44408	0.66664	0.999834	1216	3	-0.0072483\	1.17111
NTC_new_84	6	0.40957	0.62863	0.999997	1201	2	0.046368	0.44408	0.66664	0.999834	1218	3	0.046368\	1.17111
KAT6A	6	0.1011	0.25042	0.98132	485	3	-0.15428	0.44432	0.66686	0.999834	1219	2	-0.15428\	1.17033
ACTR3B	6	0.37656	0.59477	0.999997	1139	3	-0.047361	0.44444	0.667	0.999834	1220	2	-0.047361\	1.16994
HDAC3	6	0.23331	0.44014	0.999997	839	2	-0.058038	0.44463	0.66722	0.999834	1221	2	-0.058038\	1.16932
SAP25	6	0.32352	0.53934	0.999997	1033	2	-0.070401	0.44464	0.66722	0.999834	1222	2	-0.070401\	1.16929
JARID2	6	0.39667	0.61564	0.999997	1177	3	-0.035062	0.44526	0.66778	0.999834	1223	2	-0.035062\	1.16728
ACAT1	6	0.15628	0.35008	0.989288	678	3	-0.086617	0.44811	0.67041	0.999834	1224	3	-0.086617\	1.15808
JADE1	6	0.033521	0.11283	0.882013	241	4	-0.38495	0.44905	0.67121	0.999834	1225	2	-0.38495\	1.15505
NTC_new_413	6	0.42028	0.63945	0.999997	1223	3	-0.031047	0.44991	0.67203	0.999834	1226	2	-0.031047\	1.15229
NTC_new_422	6	0.43086	0.6473	0.999997	1236	2	0.046067	0.44991	0.67203	0.999834	1231	3	0.046067\	1.15229
NTC_new_563	6	0.51029	0.69443	0.999997	1317	1	-0.08485	0.44991	0.67203	0.999834	1229	2	-0.08485\	1.15229
NTC_new_59	6	0.47437	0.67291	0.999997	1280	2	0.024891	0.44991	0.67203	0.999834	1232	3	0.024891\	1.15229
NTC_new_688	6	0.014122	0.053101	0.732989	125	2	0.0013674	0.44991	0.67203	0.999834	1227	2	0.0013674\	1.15229
NTC_new_891	6	0.041505	0.13102	0.882013	275	3	-0.24024	0.44991	0.67203	0.999834	1230	2	-0.24024\	1.15229
NTC_new_981	6	0.1453	0.331	0.986369	648	2	0.022078	0.44991	0.67203	0.999834	1228	2	0.022078\	1.15229
NTC_new_5	6	0.29929	0.51327	0.999997	988	2	0.10135	0.45032	0.67248	0.999834	1233	3	0.10135\	1.15098
NTC_new_640	6	0.64821	0.78163	0.999997	1480	2	0.011315	0.45032	0.67248	0.999834	1234	3	0.011315\	1.15098
ACTR5	6	0.58187	0.73832	0.999997	1389	2	-0.039765	0.45187	0.6738	0.999834	1235	2	-0.039765\	1.14602
KDM5B	6	0.80239	0.86587	0.999997	1650	1	0.04602	0.45291	0.6748	0.999834	1236	3	0.04602\	1.1427
HDGFRP2	6	0.024793	0.087156	0.882013	188	5	-0.29848	0.45312	0.675	0.999834	1237	1	-0.29848\	1.14203
BAHD1	6	0.029338	0.10014	0.882013	209	2	-0.0090562	0.45433	0.67614	0.999834	1238	2	-0.0090562\	1.13819
NTC_new_382	6	0.43086	0.6473	0.999997	1235	2	0.08263	0.45595	0.67757	0.999834	1239	3	0.08263\	1.13305
NTC_new_398	6	0.70062	0.81737	0.999997	1550	2	0.034154	0.45595	0.67757	0.999834	1241	3	0.034154\	1.13305
NTC_new_605	6	0.72882	0.83785	0.999997	1593	2	0.046378	0.45595	0.67757	0.999834	1240	3	0.046378\	1.13305
SMEK1	6	0.37139	0.58931	0.999997	1120	3	0.020485	0.45863	0.68011	0.999834	1242	3	0.020485\	1.1246
BRMS1	6	0.095885	0.24016	0.979689	469	1	0.11306	0.46023	0.68154	0.999834	1243	3	0.11306\	1.11957
NTC_new_474	6	0.39233	0.61119	0.999997	1170	3	-0.050513	0.46172	0.68277	0.999834	1244	2	-0.050513\	1.11491
NTC_new_67	6	0.071636	0.19241	0.932503	397	2	-0.027193	0.46172	0.68277	0.999834	1245	2	-0.027193\	1.11491
RBBP5	6	0.044793	0.1379	0.882013	288	2	0.10034	0.46184	0.68289	0.999834	1246	3	0.10034\	1.11453
NTC_new_1000	6	0.016943	0.062705	0.791025	152	5	-0.26129	0.46351	0.68437	0.999834	1252	1	-0.26129\	1.10933
NTC_new_16	6	0.010116	0.039878	0.732989	81	5	-0.47346	0.46351	0.68437	0.999834	1250	1	-0.47346\	1.10933
NTC_new_327	6	0.13349	0.31018	0.986369	595	4	-0.18269	0.46351	0.68437	0.999834	1251	2	-0.18269\	1.10933
NTC_new_350	6	0.66094	0.79033	0.999997	1500	2	0.071411	0.46351	0.68437	0.999834	1247	3	0.071411\	1.10933
NTC_new_497	6	0.00074706	0.0040725	0.588538	12	5	-0.46732	0.46351	0.68437	0.999834	1249	1	-0.46732\	1.10933
NTC_new_844	6	0.44103	0.65334	0.999997	1247	2	-0.066831	0.46351	0.68437	0.999834	1253	2	-0.066831\	1.10933
NTC_new_911	6	0.078353	0.20566	0.940953	420	4	-0.2946	0.46351	0.68437	0.999834	1248	1	-0.2946\	1.10933
PHF2	6	0.42368	0.64305	0.999997	1229	2	0.14708	0.46362	0.68446	0.999834	1254	3	0.14708\	1.10899
FOXP1	6	0.28556	0.49812	0.999997	962	3	-0.1316	0.46499	0.68563	0.999834	1255	2	-0.1316\	1.10473
NTC_new_1020	6	0.14688	0.33374	0.986569	653	3	-0.094974	0.46639	0.68704	0.999834	1257	3	-0.094974\	1.10039
NTC_new_159	6	0.0456	0.13955	0.882013	300	3	-0.11189	0.46639	0.68704	0.999834	1260	3	-0.11189\	1.10039
NTC_new_360	6	0.54217	0.71396	0.999997	1351	2	0.043086	0.46639	0.68704	0.999834	1259	3	0.043086\	1.10039
NTC_new_622	6	0.48238	0.67763	0.999997	1288	2	0.13457	0.46639	0.68704	0.999834	1258	3	0.13457\	1.10039
NTC_new_935	6	0.47023	0.67043	0.999997	1277	1	0.053172	0.46639	0.68704	0.999834	1261	3	0.053172\	1.10039
NTC_new_982	6	0.93104	0.93221	0.999997	1768	1	0.12045	0.46639	0.68704	0.999834	1256	3	0.12045\	1.10039
NTC_new_571	6	0.27996	0.49212	0.999997	943	3	-0.16745	0.46744	0.68805	0.999834	1262	2	-0.16745\	1.09715
NTC_new_591	6	0.11919	0.28437	0.986369	549	4	-0.17194	0.46744	0.68805	0.999834	1263	2	-0.17194\	1.09715
NTC_new_902	6	0.16194	0.35792	0.989288	691	2	-0.026206	0.46744	0.68805	0.999834	1264	2	-0.026206\	1.09715
NTC_new_903	6	0.19907	0.4013	0.999997	763	2	0.060838	0.46744	0.68805	0.999834	1265	3	0.060838\	1.09715
CDK5	6	0.59532	0.74651	0.999997	1403	2	0.056995	0.46934	0.68977	0.999834	1266	3	0.056995\	1.09129
RAD54L2	6	0.089044	0.2267	0.965368	451	4	-0.25382	0.47009	0.69044	0.999834	1267	2	-0.25382\	1.08899
ZZZ3	6	0.91362	0.9189	0.999997	1740	1	0.13265	0.47148	0.69159	0.999834	1268	3	0.13265\	1.08473
PRDM14	6	0.16292	0.35909	0.989288	702	3	-0.19527	0.47282	0.69277	0.999834	1269	1	-0.19527\	1.08064
NTC_new_1026	6	0.10495	0.25769	0.98132	500	3	-0.095643	0.47433	0.69418	0.999834	1270	3	-0.095643\	1.07604
NTC_new_238	6	0.1152	0.27708	0.986369	534	3	-0.044056	0.47433	0.69418	0.999834	1272	3	-0.044056\	1.07604
NTC_new_580	6	0.1265	0.29773	0.986369	571	2	0.036148	0.47433	0.69418	0.999834	1271	3	0.036148\	1.07604
L3MBTL2	6	0.14599	0.33218	0.986569	650	2	-0.031336	0.47661	0.69607	0.999834	1273	2	-0.031336\	1.06912
FOXP4	6	0.10992	0.26694	0.981487	526	4	-0.18624	0.47701	0.69641	0.999834	1274	2	-0.18624\	1.06791
NTC_new_113	6	0.31238	0.52729	0.999997	1013	3	-0.16846	0.47795	0.69734	0.999834	1276	2	-0.16846\	1.06507
NTC_new_231	6	0.22892	0.43523	0.999997	827	3	-0.075937	0.47795	0.69734	0.999834	1277	1	-0.075937\	1.06507
NTC_new_507	6	0.1532	0.34486	0.989288	672	3	-0.15603	0.47795	0.69734	0.999834	1275	2	-0.15603\	1.06507
NTC_new_610	6	0.086495	0.2219	0.953696	449	4	-0.21187	0.47795	0.69734	0.999834	1278	2	-0.21187\	1.06507
ELP6	6	0.93206	0.93305	0.999997	1769	1	0.18736	0.47823	0.69762	0.999834	1279	3	0.18736\	1.06422
HIST1H4G	6	0.14709	0.33413	0.986569	655	4	-0.13695	0.47924	0.6985	0.999834	1280	2	-0.13695\	1.06118
NTC_new_166	6	0.052351	0.15362	0.897595	330	3	-0.16429	0.48057	0.6998	0.999834	1281	3	-0.16429\	1.05718
NTC_new_254	6	0.012125	0.046482	0.732989	91	3	-0.18911	0.48057	0.6998	0.999834	1284	3	-0.18911\	1.05718
NTC_new_684	6	0.19907	0.4013	0.999997	767	2	0.11953	0.48057	0.6998	0.999834	1283	3	0.11953\	1.05718
NTC_new_825	6	0.37243	0.59034	0.999997	1131	3	0.012635	0.48057	0.6998	0.999834	1285	3	0.012635\	1.05718
NTC_new_833	6	0.49936	0.68772	0.999997	1305	1	0.085382	0.48057	0.6998	0.999834	1282	3	0.085382\	1.05718
NTC_new_211	6	0.2214	0.4267	0.999997	813	2	-0.076658	0.48177	0.70098	0.999834	1287	2	-0.076658\	1.05358
NTC_new_50	6	0.055238	0.1597	0.898904	334	4	-0.29821	0.48177	0.70098	0.999834	1286	2	-0.29821\	1.05358
NTC_new_936	6	0.60033	0.74976	0.999997	1406	2	0.014193	0.48177	0.70098	0.999834	1288	2	0.014193\	1.05358
NTC_new_992	6	0.41299	0.6319	0.999997	1207	3	-0.11564	0.48177	0.70098	0.999834	1289	2	-0.11564\	1.05358
ZRANB3	6	0.4099	0.62892	0.999997	1203	2	0.11299	0.48325	0.70227	0.999834	1290	3	0.11299\	1.04916
BAP1	6	0.40287	0.62197	0.999997	1189	3	-0.030631	0.48414	0.7031	0.999834	1291	3	-0.030631\	1.0465
PWWP2B	6	0.28422	0.49672	0.999997	960	2	0.063166	0.48485	0.70369	0.999834	1292	3	0.063166\	1.04439
ARRB1	6	0.44733	0.6572	0.999997	1253	2	0.079401	0.48491	0.70375	0.999834	1293	3	0.079401\	1.04421
HR	6	0.29158	0.50465	0.999997	972	2	0.043678	0.48592	0.70473	0.999834	1294	2	0.043678\	1.04121
NCOR2	6	0.6549	0.78611	0.999997	1489	2	-0.0002052	0.48681	0.70546	0.999834	1295	3	-0.0002052\	1.03857
NTC_new_1065	6	0.36569	0.5835	0.999997	1108	3	-0.046436	0.4869	0.70553	0.999834	1299	1	-0.046436\	1.0383
NTC_new_215	6	0.3873	0.60603	0.999997	1159	3	-0.14202	0.4869	0.70553	0.999834	1300	1	-0.14202\	1.0383
NTC_new_216	6	0.014122	0.053101	0.732989	116	3	-0.092492	0.4869	0.70553	0.999834	1298	2	-0.092492\	1.0383
NTC_new_298	6	0.013917	0.05241	0.732989	105	4	-0.43227	0.4869	0.70553	0.999834	1296	2	-0.43227\	1.0383
NTC_new_311	6	0.39233	0.61119	0.999997	1172	3	-0.051182	0.4869	0.70553	0.999834	1297	2	-0.051182\	1.0383
NTC_new_409	6	0.30555	0.51996	0.999997	999	3	-0.20371	0.4869	0.70553	0.999834	1301	2	-0.20371\	1.0383
NTC_new_420	6	0.55322	0.7206	0.999997	1361	1	-0.020316	0.4869	0.70553	0.999834	1304	1	-0.020316\	1.0383
NTC_new_739	6	0.010693	0.041777	0.732989	83	4	-0.44007	0.4869	0.70553	0.999834	1302	1	-0.44007\	1.0383
NTC_new_857	6	0.029551	0.10077	0.882013	211	3	-0.24181	0.4869	0.70553	0.999834	1303	1	-0.24181\	1.0383
SUPT6H	6	0.32015	0.53563	0.999997	1024	1	0.12327	0.48788	0.70645	0.999834	1305	3	0.12327\	1.0354
HIST1H2BE	6	0.34446	0.56191	0.999997	1068	3	-0.014836	0.49001	0.7084	0.999834	1306	3	-0.014836\	1.02912
GATAD2B	6	0.241	0.44886	0.999997	854	3	-0.2142	0.49176	0.7099	0.999834	1307	2	-0.2142\	1.02397
NTC_new_343	6	0.19907	0.4013	0.999997	762	2	-0.0017624	0.49286	0.71094	0.999834	1310	3	-0.0017624\	1.02075
NTC_new_478	6	0.9794	0.97927	0.999997	1862	0	0.093799	0.49286	0.71094	0.999834	1309	3	0.093799\	1.02075
NTC_new_54	6	0.10964	0.26635	0.98132	519	2	-0.00022275	0.49286	0.71094	0.999834	1308	3	-0.00022275\	1.02075
HIST1H3E	6	0.34084	0.55814	0.999997	1062	3	-0.13683	0.49309	0.71112	0.999834	1311	2	-0.13683\	1.02008
ZNF711	6	0.17939	0.37848	0.999997	725	3	-0.058559	0.49357	0.71156	0.999834	1312	2	-0.058559\	1.01867
PCGF1	6	0.063198	0.17547	0.898904	363	2	0.10232	0.49553	0.71332	0.999834	1313	3	0.10232\	1.01296
UTY	6	0.24336	0.45165	0.999997	859	3	-0.13328	0.49598	0.71368	0.999834	1314	2	-0.13328\	1.01165
HJURP	6	0.53305	0.70822	0.999997	1340	2	0.081809	0.4966	0.7142	0.999834	1315	3	0.081809\	1.00984
NCOA3	6	0.076585	0.20248	0.940953	411	4	-0.24651	0.49798	0.71548	0.999834	1316	2	-0.24651\	1.00584
PRMT3	6	0.94209	0.942	0.999997	1789	1	0.15336	0.49802	0.71548	0.999834	1317	3	0.15336\	1.00572
RCOR1	6	0.62519	0.76609	0.999997	1449	1	0.01189	0.49837	0.71579	0.999834	1318	3	0.01189\	1.00471
HIST3H2BB	6	0.72639	0.8361	0.999997	1588	2	0.11301	0.49873	0.71608	0.999834	1319	3	0.11301\	1.00367
H1F0	6	0.34654	0.56397	0.999997	1072	3	-0.034831	0.49891	0.71621	0.999834	1320	3	-0.034831\	1.00315
HIST2H3D	6	0.6446	0.77916	0.999997	1472	1	0.05569	0.49909	0.71639	0.999834	1321	3	0.05569\	1.00263
TAF9B	6	0.98306	0.98284	0.999997	1873	0	0.12848	0.49926	0.71652	0.999834	1322	3	0.12848\	1.00214
AIRE	6	0.70429	0.8199	0.999997	1556	1	0.058073	0.49944	0.71668	0.999834	1323	3	0.058073\	1.00162
NTC_new_1079	6	0.96597	0.96593	0.999997	1830	0	-0.038095	0.49965	0.71685	0.999834	1329	2	-0.038095\	1.00101
NTC_new_290	6	0.1453	0.331	0.986369	640	3	-0.13403	0.49965	0.71685	0.999834	1324	1	-0.13403\	1.00101
NTC_new_446	6	0.27367	0.48514	0.999997	934	3	-0.064128	0.49965	0.71685	0.999834	1326	2	-0.064128\	1.00101
NTC_new_456	6	0.1652	0.36178	0.992465	703	3	-0.068169	0.49965	0.71685	0.999834	1327	3	-0.068169\	1.00101
NTC_new_569	6	0.31225	0.5271	0.999997	1003	2	0.002447	0.49965	0.71685	0.999834	1325	2	0.002447\	1.00101
NTC_new_849	6	0.15642	0.35028	0.989288	679	4	-0.14543	0.49965	0.71685	0.999834	1328	1	-0.14543\	1.00101
NTC_new_1027	6	0.97003	0.96977	0.999997	1837	0	0.11464	0.50202	0.71891	0.999834	1331	3	0.11464\	0.994183
NTC_new_299	6	0.014122	0.053101	0.732989	109	3	-0.10823	0.50202	0.71891	0.999834	1330	3	-0.10823\	0.994183
NTC_new_734	6	0.0594	0.16778	0.898904	356	3	0.010753	0.50202	0.71891	0.999834	1332	3	0.010753\	0.994183
NTC_new_983	6	0.046604	0.14172	0.882255	308	2	0.041638	0.50202	0.71891	0.999834	1333	3	0.041638\	0.994183
KDM5C	6	0.63766	0.77437	0.999997	1463	2	0.020409	0.5047	0.72114	0.999834	1334	2	0.020409\	0.986502
TAF1L	6	0.077686	0.20449	0.940953	414	4	-0.17505	0.50557	0.72204	0.999834	1335	1	-0.17505\	0.984017
HMGA1	6	0.72565	0.83556	0.999997	1586	2	0.0041839	0.50716	0.72346	0.999834	1336	2	0.0041839\	0.979487
ATXN7L3	6	0.0081132	0.033376	0.732989	72	4	-0.77204	0.50757	0.72373	0.999834	1337	1	-0.77204\	0.978321
NTC_new_1041	6	0.014122	0.053101	0.732989	138	1	0.080388	0.50779	0.72395	0.999834	1342	3	0.080388\	0.977696
NTC_new_191	6	0.97452	0.97431	0.999997	1853	0	0.095951	0.50779	0.72395	0.999834	1338	3	0.095951\	0.977696
NTC_new_209	6	0.63454	0.7724	0.999997	1459	2	0.067419	0.50779	0.72395	0.999834	1339	3	0.067419\	0.977696
NTC_new_391	6	0.26731	0.47834	0.999997	925	2	0.080388	0.50779	0.72395	0.999834	1340	3	0.080388\	0.977696
NTC_new_801	6	0.64821	0.78163	0.999997	1479	2	0.028896	0.50779	0.72395	0.999834	1341	3	0.028896\	0.977696
YAF2	6	0.013791	0.051985	0.732989	102	3	-0.22678	0.50915	0.72527	0.999834	1343	2	-0.22678\	0.973837
PHF23	6	0.0061334	0.026322	0.732989	57	3	-0.014962	0.50929	0.72539	0.999834	1344	2	-0.014962\	0.973441
APOBEC3A	6	0.67251	0.7984	0.999997	1514	2	0.087558	0.51071	0.72673	0.999834	1345	2	0.087558\	0.969424
GSE1	6	0.0012907	0.0066885	0.588538	19	3	-0.14017	0.51113	0.72712	0.999834	1346	2	-0.14017\	0.968238
PHF19	6	0.74314	0.8477	0.999997	1613	1	0.10916	0.51169	0.72758	0.999834	1347	3	0.10916\	0.966658
CCDC101	6	0.95982	0.95977	0.999997	1817	0	0.09209	0.51222	0.72808	0.999834	1348	3	0.09209\	0.965165
TCF19	6	0.942	0.94189	0.999997	1787	1	0.039359	0.51328	0.72903	0.999834	1349	3	0.039359\	0.962182
NTC_new_204	6	0.012125	0.046482	0.732989	90	3	-0.27206	0.51381	0.72942	0.999834	1352	2	-0.27206\	0.960693
NTC_new_570	6	0.16194	0.35792	0.989288	696	1	-0.060072	0.51381	0.72942	0.999834	1353	2	-0.060072\	0.960693
NTC_new_809	6	0.20127	0.40378	0.999997	777	2	-0.014308	0.51381	0.72942	0.999834	1350	2	-0.014308\	0.960693
NTC_new_877	6	0.21792	0.42278	0.999997	805	3	-0.12568	0.51381	0.72942	0.999834	1351	2	-0.12568\	0.960693
NIPBL	6	0.08058	0.21024	0.942248	429	2	0.061704	0.51487	0.73027	0.999834	1354	3	0.061704\	0.95772
HIST1H2BJ	6	0.51331	0.69626	0.999997	1321	2	0.016966	0.51523	0.7306	0.999834	1355	3	0.016966\	0.956711
PRMT7	6	0.11565	0.27796	0.986369	537	1	0.041469	0.5154	0.73074	0.999834	1356	3	0.041469\	0.956236
SF3B1	6	0.50098	0.68862	0.999997	1310	2	-0.13297	0.51553	0.73088	0.999834	1357	1	-0.13297\	0.955872
NTC_new_1024	6	0.22892	0.43523	0.999997	829	3	-0.14642	0.51904	0.73298	0.999834	1358	2	-0.14642\	0.946082
NTC_new_342	6	0.22934	0.43562	0.999997	835	3	-0.13986	0.51904	0.73298	0.999834	1360	2	-0.13986\	0.946082
NTC_new_660	6	0.064326	0.17755	0.898904	377	2	-0.0049855	0.51904	0.73298	0.999834	1359	2	-0.0049855\	0.946082
NTC_new_115	6	0.031016	0.10498	0.882013	225	4	-0.39206	0.52171	0.73425	0.999834	1366	1	-0.39206\	0.93868
NTC_new_151	6	0.15193	0.34264	0.987568	671	4	-0.16304	0.52171	0.73425	0.999834	1367	1	-0.16304\	0.93868
NTC_new_227	6	0.16194	0.35792	0.989288	693	3	-0.12827	0.52171	0.73425	0.999834	1364	2	-0.12827\	0.93868
NTC_new_338	6	0.022429	0.079978	0.868979	177	2	-0.024712	0.52171	0.73425	0.999834	1365	2	-0.024712\	0.93868
NTC_new_473	6	0.93396	0.93455	0.999997	1778	1	0.029242	0.52171	0.73425	0.999834	1368	2	0.029242\	0.93868
NTC_new_689	6	0.064326	0.17755	0.898904	379	3	-0.083086	0.52171	0.73425	0.999834	1363	2	-0.083086\	0.93868
NTC_new_874	6	0.063428	0.17589	0.898904	367	4	-0.31158	0.52171	0.73425	0.999834	1361	1	-0.31158\	0.93868
NTC_new_986	6	0.6881	0.80896	0.999997	1531	2	-0.046157	0.52171	0.73425	0.999834	1362	1	-0.046157\	0.93868
USP49	6	0.29235	0.50564	0.999997	973	2	0.05679	0.52258	0.73471	0.999834	1369	2	0.05679\	0.936276
CUL4B	6	0.20353	0.40653	0.999997	784	3	-0.19571	0.52317	0.73492	0.999834	1370	2	-0.19571\	0.934648
NTC_new_999	6	0.70634	0.82153	0.999997	1557	1	0.051649	0.52523	0.73592	0.999834	1371	2	0.051649\	0.928979
BRCA2	6	0.074301	0.19773	0.936887	407	3	-0.12126	0.52644	0.73652	0.999834	1372	1	-0.12126\	0.925659
BRE	6	0.29801	0.51187	0.999997	985	3	-0.10445	0.52905	0.73776	0.999834	1373	2	-0.10445\	0.918524
NTC_new_490	6	0.12223	0.28994	0.986369	557	2	0.020662	0.531	0.73871	0.999834	1375	2	0.020662\	0.913216
NTC_new_511	6	0.0038025	0.018115	0.732989	45	4	-0.59489	0.531	0.73871	0.999834	1374	2	-0.59489\	0.913216
NTC_new_589	6	0.10495	0.25769	0.98132	499	3	-0.21751	0.531	0.73871	0.999834	1376	2	-0.21751\	0.913216
NTC_new_477	6	0.062032	0.1732	0.898904	361	4	-0.25102	0.53182	0.73912	0.999834	1377	2	-0.25102\	0.91099
NTC_new_539	6	0.049416	0.14769	0.894038	317	3	-0.4472	0.53182	0.73912	0.999834	1379	2	-0.4472\	0.91099
NTC_new_547	6	0.89479	0.9068	0.999997	1719	1	0.023803	0.53182	0.73912	0.999834	1378	2	0.023803\	0.91099
NTC_new_544	6	0.47023	0.67043	0.999997	1272	2	-0.078987	0.53578	0.74104	0.999834	1380	2	-0.078987\	0.900287
SIRT5	6	0.056233	0.16169	0.898904	346	3	-0.30861	0.53796	0.74218	0.999834	1381	2	-0.30861\	0.894429
NTC_new_824	6	0.042541	0.13316	0.882013	282	3	-0.15821	0.54285	0.74461	0.999834	1382	2	-0.15821\	0.881374
NTC_new_445	6	0.021729	0.077813	0.859943	174	4	-0.37819	0.54296	0.74468	0.999834	1383	1	-0.37819\	0.881082
NTC_new_82	6	0.13664	0.31584	0.986369	610	4	-0.22929	0.54296	0.74468	0.999834	1384	2	-0.22929\	0.881082
NTC_new_826	6	0.093217	0.23479	0.97443	465	4	-0.23957	0.54296	0.74468	0.999834	1385	2	-0.23957\	0.881082
CDYL2	6	0.32825	0.54439	0.999997	1040	2	-0.029465	0.5467	0.7465	0.999834	1386	2	-0.029465\	0.871179
HIST1H4L	6	0.033362	0.11232	0.882013	240	4	-0.20151	0.54818	0.74718	0.999834	1387	2	-0.20151\	0.867278
CDC6	6	0.44939	0.65837	0.999997	1255	2	0.012612	0.54939	0.74774	0.999834	1388	2	0.012612\	0.864097
NTC_new_1012	6	0.052351	0.15362	0.897595	327	3	-0.28307	0.55335	0.74966	0.999834	1391	1	-0.28307\	0.853736
NTC_new_1075	6	0.0594	0.16778	0.898904	355	3	-0.09104	0.55335	0.74966	0.999834	1392	1	-0.09104\	0.853736
NTC_new_126	6	0.12223	0.28994	0.986369	559	2	-0.13319	0.55335	0.74966	0.999834	1390	1	-0.13319\	0.853736
NTC_new_38	6	0.064326	0.17755	0.898904	372	3	-0.12611	0.55335	0.74966	0.999834	1389	2	-0.12611\	0.853736
NTC_new_890	6	0.0051835	0.023066	0.732989	51	5	-0.34468	0.55335	0.74966	0.999834	1394	1	-0.34468\	0.853736
NTC_new_988	6	0.0594	0.16778	0.898904	353	4	-0.26637	0.55335	0.74966	0.999834	1393	1	-0.26637\	0.853736
HIST1H3J	6	0.67203	0.79807	0.999997	1512	2	-0.029937	0.5538	0.74983	0.999834	1395	2	-0.029937\	0.852563
HMGB2	6	0.24459	0.45297	0.999997	861	3	-0.15732	0.55399	0.74994	0.999834	1396	2	-0.15732\	0.852068
CHAF1B	6	0.34481	0.56228	0.999997	1069	3	-0.080108	0.55494	0.75035	0.999834	1397	2	-0.080108\	0.849596
SS18L1	6	0.17765	0.3764	0.999997	723	3	-0.13022	0.55795	0.75184	0.999834	1398	1	-0.13022\	0.841792
RING1	6	0.19769	0.39976	0.999997	760	3	-0.13227	0.55913	0.75243	0.999834	1399	2	-0.13227\	0.838744
MEN1	6	0.010479	0.041071	0.732989	82	3	-0.22571	0.56046	0.75314	0.999834	1400	2	-0.22571\	0.835317
MBIP	6	0.12333	0.29214	0.986369	562	3	-0.22417	0.56056	0.75318	0.999834	1401	1	-0.22417\	0.835059
SUPT7L	6	0.96004	0.96001	0.999997	1820	0	0.046204	0.56122	0.75356	0.999834	1402	2	0.046204\	0.833362
NTC_new_370	6	0.016102	0.059762	0.766474	149	3	-0.16982	0.56471	0.7553	0.999834	1406	2	-0.16982\	0.824418
NTC_new_706	6	0.010818	0.042258	0.732989	84	5	-0.29211	0.56471	0.7553	0.999834	1405	1	-0.29211\	0.824418
NTC_new_767	6	0.069925	0.18897	0.927564	389	4	-0.24151	0.56471	0.7553	0.999834	1404	1	-0.24151\	0.824418
NTC_new_918	6	0.032337	0.10902	0.882013	234	4	-0.32179	0.56471	0.7553	0.999834	1403	1	-0.32179\	0.824418
SP110	6	0.22296	0.42854	0.999997	820	3	-0.20375	0.56595	0.75587	0.999834	1407	2	-0.20375\	0.821253
KDM4B	6	0.71169	0.82545	0.999997	1565	1	0.048306	0.56633	0.75603	0.999834	1408	2	0.048306\	0.820285
ELP3	6	0.80332	0.86621	0.999997	1651	1	0.10445	0.56841	0.75712	0.999834	1409	2	0.10445\	0.814996
ING1	6	0.34931	0.56665	0.999997	1081	3	-0.15601	0.56935	0.75755	0.999834	1410	2	-0.15601\	0.812612
SETD7	6	0.4525	0.66023	0.999997	1259	2	0.013904	0.57087	0.7584	0.999834	1411	2	0.013904\	0.808766
NTC_new_773	6	0.25037	0.45953	0.999997	874	3	-0.11952	0.57235	0.75919	0.999834	1412	2	-0.11952\	0.80503
NTC_new_194	6	0.048503	0.1458	0.893392	314	4	-0.27539	0.57367	0.75977	0.999834	1414	2	-0.27539\	0.801707
NTC_new_364	6	0.63823	0.77474	0.999997	1464	2	-0.080935	0.57367	0.75977	0.999834	1413	1	-0.080935\	0.801707
CHD1L	6	0.080098	0.20925	0.942248	428	2	0.0039006	0.57747	0.76165	0.999834	1415	2	0.0039006\	0.792182
NTC_new_222	6	0.15193	0.34264	0.987568	670	4	-0.18336	0.57908	0.76247	0.999834	1418	2	-0.18336\	0.788165
NTC_new_529	6	0.38035	0.59855	0.999997	1143	2	-0.022984	0.57908	0.76247	0.999834	1417	2	-0.022984\	0.788165
NTC_new_556	6	0.0456	0.13955	0.882013	304	1	-0.054455	0.57908	0.76247	0.999834	1419	2	-0.054455\	0.788165
NTC_new_648	6	0.096549	0.24149	0.979689	472	4	-0.26265	0.57908	0.76247	0.999834	1420	2	-0.26265\	0.788165
NTC_new_724	6	0.55561	0.72197	0.999997	1366	2	-0.13475	0.57908	0.76247	0.999834	1421	2	-0.13475\	0.788165
NTC_new_92	6	0.036826	0.12069	0.882013	258	4	-0.39051	0.57908	0.76247	0.999834	1416	2	-0.39051\	0.788165
NTC_new_108	6	0.1091	0.26539	0.98132	507	2	-0.025347	0.58161	0.76364	0.999834	1431	2	-0.025347\	0.781876
NTC_new_340	6	0.2589	0.46915	0.999997	894	3	-0.1718	0.58161	0.76364	0.999834	1422	1	-0.1718\	0.781876
NTC_new_46	6	0.31238	0.52729	0.999997	1009	3	-0.15559	0.58161	0.76364	0.999834	1424	1	-0.15559\	0.781876
NTC_new_542	6	0.014122	0.053101	0.732989	124	2	-0.084162	0.58161	0.76364	0.999834	1427	1	-0.084162\	0.781876
NTC_new_621	6	0.042541	0.13316	0.882013	277	3	-0.088126	0.58161	0.76364	0.999834	1429	2	-0.088126\	0.781876
NTC_new_76	6	0.014122	0.053101	0.732989	121	4	-0.24062	0.58161	0.76364	0.999834	1430	1	-0.24062\	0.781876
NTC_new_87	6	0.12816	0.30072	0.986369	586	4	-0.1584	0.58161	0.76364	0.999834	1425	2	-0.1584\	0.781876
NTC_new_901	6	0.42028	0.63945	0.999997	1225	3	-0.078755	0.58161	0.76364	0.999834	1426	1	-0.078755\	0.781876
NTC_new_942	6	0.032928	0.11092	0.882013	237	3	-0.28057	0.58161	0.76364	0.999834	1423	2	-0.28057\	0.781876
NTC_new_976	6	0.0456	0.13955	0.882013	296	3	-0.19018	0.58161	0.76364	0.999834	1428	2	-0.19018\	0.781876
USP11	6	0.49455	0.68497	0.999997	1300	2	0.0066122	0.58224	0.76394	0.999834	1432	2	0.0066122\	0.780314
SSRP1	6	0.2939	0.5074	0.999997	976	2	-0.11529	0.5828	0.7642	0.999834	1433	2	-0.11529\	0.778927
MSH6	6	0.19856	0.40077	0.999997	761	3	-0.17867	0.58621	0.76581	0.999834	1434	2	-0.17867\	0.770511
NTC_new_799	6	0.30555	0.51996	0.999997	998	3	-0.10114	0.5876	0.76633	0.999834	1435	2	-0.10114\	0.767094
NTC_new_925	6	0.267	0.47804	0.999997	919	3	-0.074881	0.5876	0.76633	0.999834	1439	2	-0.074881\	0.767094
NTC_new_939	6	0.096616	0.24163	0.979689	477	3	-0.13847	0.5876	0.76633	0.999834	1436	2	-0.13847\	0.767094
NTC_new_963	6	0.064326	0.17755	0.898904	371	2	-0.084152	0.5876	0.76633	0.999834	1438	2	-0.084152\	0.767094
NTC_new_984	6	0.57671	0.73515	0.999997	1385	2	-0.081477	0.5876	0.76633	0.999834	1440	2	-0.081477\	0.767094
NTC_new_996	6	0.0456	0.13955	0.882013	292	2	-0.079815	0.5876	0.76633	0.999834	1437	2	-0.079815\	0.767094
TNP1	6	0.12558	0.29616	0.986369	568	3	-0.12693	0.59187	0.76855	0.999834	1441	2	-0.12693\	0.756648
NTC_new_341	6	0.23473	0.44175	0.999997	843	3	-0.12946	0.59413	0.76975	0.999834	1443	2	-0.12946\	0.751149
NTC_new_408	6	0.29929	0.51327	0.999997	989	2	0.0029058	0.59413	0.76975	0.999834	1442	2	0.0029058\	0.751149
NTC_new_952	6	0.014122	0.053101	0.732989	114	4	-0.34285	0.59413	0.76975	0.999834	1444	2	-0.34285\	0.751149
PRMT2	6	0.14666	0.33336	0.986569	651	4	-0.16769	0.59553	0.7705	0.999834	1445	2	-0.16769\	0.747754
AKAP1	6	0.41422	0.63313	0.999997	1209	1	-0.059356	0.59699	0.77133	0.999834	1446	2	-0.059356\	0.744221
FOXP3	6	0.064024	0.17694	0.898904	369	2	0.10318	0.59915	0.77238	0.999834	1447	2	0.10318\	0.739011
UBN1	6	0.05221	0.15337	0.897595	326	4	-0.35898	0.60181	0.77397	0.999834	1448	1	-0.35898\	0.73262
SND1	6	0.050408	0.14978	0.894038	323	3	-0.32582	0.60386	0.77513	0.999834	1449	2	-0.32582\	0.727714
ING5	6	0.36104	0.57872	0.999997	1098	1	0.044482	0.60477	0.77557	0.999834	1450	2	0.044482\	0.725542
NTC_new_121	6	0.9064	0.91394	0.999997	1734	1	0.022356	0.60765	0.77725	0.999834	1453	2	0.022356\	0.718688
NTC_new_242	6	0.046604	0.14172	0.882255	309	3	-0.15428	0.60765	0.77725	0.999834	1452	2	-0.15428\	0.718688
NTC_new_323	6	0.0086417	0.035132	0.732989	74	5	-0.31459	0.60765	0.77725	0.999834	1451	1	-0.31459\	0.718688
NTC_new_835	6	0.51687	0.6984	0.999997	1323	2	0.090509	0.60765	0.77725	0.999834	1454	2	0.090509\	0.718688
NTC_new_860	6	0.87074	0.89389	0.999997	1700	1	-0.044875	0.60765	0.77725	0.999834	1455	1	-0.044875\	0.718688
NTC_new_207	6	0.0056265	0.024724	0.732989	55	4	-0.48017	0.61035	0.77865	0.999834	1456	2	-0.48017\	0.712291
NTC_new_335	6	0.15193	0.34264	0.987568	668	4	-0.2138	0.61035	0.77865	0.999834	1457	2	-0.2138\	0.712291
NTC_new_754	6	0.10636	0.26025	0.98132	502	4	-0.21226	0.61035	0.77865	0.999834	1458	2	-0.21226\	0.712291
SETD4	6	0.083307	0.21562	0.948362	435	4	-0.33483	0.61536	0.78095	0.999834	1459	2	-0.33483\	0.700497
NTC_new_631	6	0.051572	0.15209	0.897595	325	4	-0.22383	0.61621	0.78139	0.999834	1460	1	-0.22383\	0.698506
NTC_new_682	6	0.056202	0.16164	0.898904	341	4	-0.34478	0.61621	0.78139	0.999834	1461	1	-0.34478\	0.698506
NTC_new_1089	6	0.1244	0.29395	0.986369	566	4	-0.21623	0.61971	0.78312	0.999834	1463	2	-0.21623\	0.690335
NTC_new_292	6	0.078353	0.20566	0.940953	418	4	-0.22951	0.61971	0.78312	0.999834	1462	2	-0.22951\	0.690335
NTC_new_239	6	0.21792	0.42278	0.999997	809	2	-0.061201	0.62348	0.78513	0.999834	1464	2	-0.061201\	0.681585
NTC_new_18	6	0.68048	0.80387	0.999997	1522	2	-0.016002	0.62413	0.78545	0.999834	1467	2	-0.016002\	0.680082
NTC_new_35	6	0.014122	0.053101	0.732989	112	2	-0.084162	0.62413	0.78545	0.999834	1466	2	-0.084162\	0.680082
NTC_new_614	6	0.063428	0.17589	0.898904	364	4	-0.375	0.62413	0.78545	0.999834	1465	2	-0.375\	0.680082
PKN1	6	0.0024966	0.012514	0.696408	33	3	-0.1679	0.62679	0.78697	0.999834	1468	2	-0.1679\	0.673946
TFPT	6	0.12595	0.29682	0.986369	569	4	-0.20906	0.62747	0.78726	0.999834	1469	1	-0.20906\	0.672382
HIST1H4C	6	0.67789	0.80212	0.999997	1520	2	-0.047562	0.63088	0.78923	0.999834	1470	2	-0.047562\	0.664562
NTC_new_21	6	0.69172	0.81131	0.999997	1533	1	-0.0092812	0.63142	0.78945	0.999834	1473	2	-0.0092812\	0.663328
NTC_new_357	6	0.13349	0.31018	0.986369	599	4	-0.14182	0.63142	0.78945	0.999834	1472	1	-0.14182\	0.663328
NTC_new_973	6	0.0050216	0.022584	0.732989	50	3	-0.30375	0.63142	0.78945	0.999834	1471	2	-0.30375\	0.663328
NTC_new_101	6	0.55322	0.7206	0.999997	1362	1	-0.020316	0.63341	0.79046	0.999834	1478	2	-0.020316\	0.658788
NTC_new_120	6	0.17944	0.37856	0.999997	727	2	-0.041292	0.63341	0.79046	0.999834	1480	2	-0.041292\	0.658788
NTC_new_123	6	0.71602	0.82855	0.999997	1570	2	-0.0072266	0.63341	0.79046	0.999834	1475	2	-0.0072266\	0.658788
NTC_new_22	6	0.56883	0.73025	0.999997	1376	1	0.055844	0.63341	0.79046	0.999834	1479	2	0.055844\	0.658788
NTC_new_615	6	0.36294	0.58076	0.999997	1100	2	-0.080068	0.63341	0.79046	0.999834	1476	2	-0.080068\	0.658788
NTC_new_643	6	0.51687	0.6984	0.999997	1324	2	-0.06241	0.63341	0.79046	0.999834	1474	2	-0.06241\	0.658788
NTC_new_728	6	0.059392	0.16778	0.898904	352	4	-0.25792	0.63341	0.79046	0.999834	1477	2	-0.25792\	0.658788
TP53	6	0.29717	0.511	0.999997	983	3	-0.11904	0.63578	0.79193	0.999834	1481	1	-0.11904\	0.6534
TRIM33	6	0.39596	0.61494	0.999997	1176	3	-0.12917	0.63645	0.79222	0.999834	1482	2	-0.12917\	0.651881
DDB1	6	0.87201	0.89445	0.999997	1702	1	0.036433	0.63679	0.7924	0.999834	1483	2	0.036433\	0.65111
TDG	6	0.084876	0.21873	0.948362	436	4	-0.32768	0.63734	0.79263	0.999834	1484	1	-0.32768\	0.649865
PBRM1	6	0.34239	0.55982	0.999997	1064	3	-0.077928	0.63852	0.79328	0.999834	1485	2	-0.077928\	0.647196
HIST1H2BB	6	0.12511	0.29525	0.986369	567	3	-0.15208	0.63867	0.79336	0.999834	1486	2	-0.15208\	0.646857
REST	6	0.12286	0.29119	0.986369	561	3	-0.20906	0.6399	0.79394	0.999834	1487	2	-0.20906\	0.644082
BAZ1B	6	0.96318	0.96326	0.999997	1826	0	-0.016468	0.64076	0.79436	0.999834	1488	2	-0.016468\	0.642144
NTC_new_137	6	0.13664	0.31584	0.986369	611	4	-0.22929	0.64175	0.79495	0.999834	1490	1	-0.22929\	0.639917
NTC_new_411	6	0.1091	0.26539	0.98132	515	2	-0.067524	0.64175	0.79495	0.999834	1489	1	-0.067524\	0.639917
NTC_new_716	6	0.027694	0.095388	0.882013	202	5	-0.246	0.64175	0.79495	0.999834	1492	1	-0.246\	0.639917
NTC_new_720	6	0.069925	0.18897	0.927564	393	4	-0.24151	0.64175	0.79495	0.999834	1491	1	-0.24151\	0.639917
BCORL1	6	0.099205	0.24659	0.98132	480	3	-0.085203	0.64504	0.79672	0.999834	1493	2	-0.085203\	0.632539
NTC_new_738	6	0.21324	0.41766	0.999997	802	3	-0.16742	0.64599	0.79724	0.999834	1495	2	-0.16742\	0.630416
NTC_new_746	6	0.66094	0.79033	0.999997	1501	2	-0.057358	0.64599	0.79724	0.999834	1494	2	-0.057358\	0.630416
CDYL	6	0.038373	0.12394	0.882013	267	4	-0.3029	0.64743	0.79806	0.999834	1496	1	-0.3029\	0.627204
FXR1	6	0.47782	0.67488	0.999997	1283	2	0.080499	0.65045	0.79963	0.999834	1497	2	0.080499\	0.62049
PRDM12	6	0.41708	0.63601	0.999997	1214	3	-0.12306	0.65088	0.79988	0.999834	1498	2	-0.12306\	0.619537
KDM1B	6	0.58098	0.73779	0.999997	1387	1	-0.092994	0.65271	0.80085	0.999834	1499	2	-0.092994\	0.615486
BARD1	6	0.15016	0.33952	0.987568	659	3	-0.13857	0.65287	0.80095	0.999834	1500	2	-0.13857\	0.615132
EHMT2	6	0.16091	0.35666	0.989288	688	3	-0.2103	0.65389	0.80141	0.999834	1501	2	-0.2103\	0.61288
TDRD3	6	0.24663	0.45529	0.999997	868	2	0.056296	0.65473	0.80191	0.999834	1502	2	0.056296\	0.611028
NTC_new_282	6	0.056202	0.16164	0.898904	344	4	-0.29481	0.65643	0.80284	0.999834	1506	1	-0.29481\	0.607287
NTC_new_429	6	0.020104	0.07274	0.840847	167	4	-0.38031	0.65643	0.80284	0.999834	1505	1	-0.38031\	0.607287
NTC_new_564	6	0.11108	0.26928	0.982617	530	3	-0.25702	0.65643	0.80284	0.999834	1504	1	-0.25702\	0.607287
NTC_new_713	6	0.069179	0.18747	0.927564	388	3	-0.21014	0.65643	0.80284	0.999834	1503	1	-0.21014\	0.607287
NTC_new_145	6	0.69262	0.8119	0.999997	1536	2	0.058468	0.65784	0.80364	0.999834	1508	2	0.058468\	0.604191
NTC_new_273	6	0.29143	0.50451	0.999997	971	3	-0.10159	0.65784	0.80364	0.999834	1509	2	-0.10159\	0.604191
NTC_new_326	6	0.011108	0.043216	0.732989	85	4	-0.5454	0.65784	0.80364	0.999834	1507	2	-0.5454\	0.604191
GADD45A	6	0.024766	0.087105	0.882013	187	5	-0.255	0.66274	0.80632	0.999834	1510	1	-0.255\	0.593485
MORF4L1	6	0.13516	0.31312	0.986369	604	3	-0.21945	0.66483	0.80742	0.999834	1511	1	-0.21945\	0.588943
PRKAB1	6	0.047642	0.14407	0.890188	312	4	-0.31182	0.66625	0.80836	0.999834	1512	2	-0.31182\	0.585864
EYA3	6	0.38489	0.60344	0.999997	1157	2	-0.030431	0.66708	0.80883	0.999834	1513	2	-0.030431\	0.584068
PHF13	6	0.53139	0.7072	0.999997	1337	2	-0.0062405	0.66873	0.80983	0.999834	1514	2	-0.0062405\	0.580504
NTC_new_1034	6	0.18899	0.38945	0.999997	748	3	-0.010948	0.66896	0.80998	0.999834	1521	2	-0.010948\	0.580008
NTC_new_144	6	0.23548	0.44255	0.999997	849	3	-0.12236	0.66896	0.80998	0.999834	1520	2	-0.12236\	0.580008
NTC_new_212	6	0.057722	0.16462	0.898904	349	4	-0.27369	0.66896	0.80998	0.999834	1522	2	-0.27369\	0.580008
NTC_new_289	6	0.015509	0.057949	0.766474	145	5	-0.38698	0.66896	0.80998	0.999834	1516	1	-0.38698\	0.580008
NTC_new_630	6	0.03363	0.11315	0.882013	243	5	-0.19861	0.66896	0.80998	0.999834	1515	1	-0.19861\	0.580008
NTC_new_634	6	0.013917	0.05241	0.732989	106	4	-0.42598	0.66896	0.80998	0.999834	1517	1	-0.42598\	0.580008
NTC_new_666	6	0.19208	0.39313	0.999997	755	2	0.03594	0.66896	0.80998	0.999834	1519	2	0.03594\	0.580008
NTC_new_829	6	0.26693	0.47795	0.999997	909	3	-0.10496	0.66896	0.80998	0.999834	1518	2	-0.10496\	0.580008
NTC_new_1085	6	0.37243	0.59034	0.999997	1128	3	-0.10569	0.67202	0.81163	0.999834	1523	2	-0.10569\	0.573424
NTC_new_488	6	0.36294	0.58076	0.999997	1099	3	-0.030081	0.67202	0.81163	0.999834	1524	2	-0.030081\	0.573424
CBX2	6	0.02709	0.093524	0.882013	199	4	-0.48789	0.67609	0.81386	0.999834	1525	1	-0.48789\	0.564713
NTC_new_1039	6	0.034756	0.11602	0.882013	252	4	-0.37983	0.67667	0.81418	0.999834	1526	2	-0.37983\	0.563476
ANP32E	6	0.14328	0.32746	0.986369	631	4	-0.24009	0.6783	0.81523	0.999834	1527	1	-0.24009\	0.560005
HP1BP3	6	0.035369	0.11728	0.882013	254	3	-0.19877	0.67983	0.81605	0.999834	1528	2	-0.19877\	0.556754
NTC_new_1013	6	0.1244	0.29395	0.986369	564	4	-0.137	0.68297	0.81774	0.999834	1532	2	-0.137\	0.550106
NTC_new_192	6	0.28004	0.49224	0.999997	948	2	-0.020196	0.68297	0.81774	0.999834	1533	2	-0.020196\	0.550106
NTC_new_253	6	0.82327	0.87352	0.999997	1662	1	-0.0043325	0.68297	0.81774	0.999834	1531	2	-0.0043325\	0.550106
NTC_new_597	6	0.60033	0.74976	0.999997	1408	2	-0.11357	0.68297	0.81774	0.999834	1529	2	-0.11357\	0.550106
NTC_new_685	6	0.090635	0.22963	0.973934	455	4	-0.21227	0.68297	0.81774	0.999834	1530	2	-0.21227\	0.550106
CHUK	6	0.076648	0.20263	0.940953	412	4	-0.30649	0.68408	0.81838	0.999834	1534	1	-0.30649\	0.547763
CDK9	6	0.061513	0.17205	0.898904	359	4	-0.5111	0.68468	0.81864	0.999834	1535	1	-0.5111\	0.546498
PYGO2	6	0.13643	0.31541	0.986369	609	2	0.04798	0.68527	0.81897	0.999834	1536	2	0.04798\	0.545256
HDAC5	6	0.36565	0.58347	0.999997	1106	2	0.026295	0.68722	0.82015	0.999834	1537	2	0.026295\	0.541156
PRDM10	6	0.26193	0.47247	0.999997	901	3	-0.23023	0.68782	0.82047	0.999834	1538	1	-0.23023\	0.539897
NTC_new_312	6	0.039062	0.12538	0.882013	271	4	-0.40362	0.68921	0.8212	0.999834	1540	2	-0.40362\	0.536984
NTC_new_365	6	0.267	0.47804	0.999997	916	3	-0.087785	0.68921	0.8212	0.999834	1539	2	-0.087785\	0.536984
NTC_new_500	6	0.22892	0.43523	0.999997	828	3	-0.086004	0.68921	0.8212	0.999834	1542	2	-0.086004\	0.536984
NTC_new_922	6	0.13901	0.31975	0.986369	621	3	-0.013511	0.68921	0.8212	0.999834	1543	2	-0.013511\	0.536984
NTC_new_997	6	0.27996	0.49212	0.999997	946	3	-0.080658	0.68921	0.8212	0.999834	1541	2	-0.080658\	0.536984
H3F3B	6	0.23246	0.43915	0.999997	837	3	-0.12843	0.69016	0.82168	0.999834	1544	2	-0.12843\	0.534997
CARM1	6	0.11784	0.28187	0.986369	546	3	-0.087034	0.69135	0.82236	0.999834	1545	2	-0.087034\	0.532512
NTC_new_141	6	0.60729	0.75471	0.999997	1422	2	-0.0069442	0.69309	0.82324	0.999834	1548	2	-0.0069442\	0.528885
NTC_new_285	6	0.11919	0.28437	0.986369	548	4	-0.24597	0.69309	0.82324	0.999834	1546	2	-0.24597\	0.528885
NTC_new_893	6	0.23473	0.44175	0.999997	845	2	-0.048229	0.69309	0.82324	0.999834	1547	2	-0.048229\	0.528885
NTC_new_168	6	0.0083104	0.034062	0.732989	73	5	-0.44284	0.6949	0.82432	0.999834	1550	1	-0.44284\	0.525123
NTC_new_366	6	0.22934	0.43562	0.999997	836	3	-0.10053	0.6949	0.82432	0.999834	1549	1	-0.10053\	0.525123
NTC_new_810	6	0.052351	0.15362	0.897595	328	3	-0.29014	0.6949	0.82432	0.999834	1551	2	-0.29014\	0.525123
NTC_new_913	6	0.40957	0.62863	0.999997	1200	2	-0.077805	0.6949	0.82432	0.999834	1552	1	-0.077805\	0.525123
HIST1H2AA	6	0.31903	0.53444	0.999997	1022	2	-0.056459	0.69624	0.82505	0.999834	1553	2	-0.056459\	0.522343
NTC_new_124	6	0.84356	0.88185	0.999997	1685	1	0.058449	0.69968	0.82696	0.999834	1554	2	0.058449\	0.515233
NTC_new_725	6	0.33189	0.5484	0.999997	1046	3	-0.11807	0.69968	0.82696	0.999834	1555	2	-0.11807\	0.515233
NTC_new_789	6	0.40757	0.62656	0.999997	1195	3	-0.030122	0.69968	0.82696	0.999834	1556	2	-0.030122\	0.515233
NTC_new_884	6	0.043759	0.13564	0.882013	287	4	-0.45245	0.69968	0.82696	0.999834	1557	2	-0.45245\	0.515233
NAP1L2	6	0.15893	0.3543	0.989288	686	3	-0.049825	0.70166	0.82811	0.999834	1558	2	-0.049825\	0.511156
YWHAB	6	0.69672	0.81457	0.999997	1540	1	0.052213	0.70418	0.82954	0.999834	1559	2	0.052213\	0.505984
PKM	6	0.0042561	0.019774	0.732989	47	5	-1.4284	0.7069	0.83127	0.999834	1560	1	-1.4284\	0.500422
NTC_new_262	6	0.53723	0.71075	0.999997	1349	2	-0.092576	0.70849	0.83223	0.999834	1563	2	-0.092576\	0.497181
NTC_new_310	6	0.3873	0.60603	0.999997	1160	3	-0.097729	0.70849	0.83223	0.999834	1562	2	-0.097729\	0.497181
NTC_new_813	6	0.1907	0.39146	0.999997	753	3	-0.14091	0.70849	0.83223	0.999834	1561	2	-0.14091\	0.497181
NTC_new_218	6	0.64821	0.78163	0.999997	1477	2	0.091243	0.71133	0.834	0.999834	1564	2	0.091243\	0.491409
NTC_new_346	6	0.085386	0.21968	0.948362	446	2	0.062868	0.71299	0.835	0.999834	1565	2	0.062868\	0.488046
APOBEC3D	6	0.2458	0.4544	0.999997	865	2	-0.027847	0.71389	0.83548	0.999834	1566	1	-0.027847\	0.486226
MTA1	6	0.71925	0.83082	0.999997	1580	2	-0.033596	0.71479	0.83596	0.999834	1567	1	-0.033596\	0.484409
RLIM	6	0.026511	0.091922	0.882013	195	4	-0.57878	0.71534	0.83636	0.999834	1568	2	-0.57878\	0.483299
NTC_new_190	6	0.12678	0.29826	0.986369	582	2	-0.10658	0.71737	0.83749	0.999834	1570	2	-0.10658\	0.479211
NTC_new_243	6	0.042541	0.13316	0.882013	280	4	-0.23627	0.71737	0.83749	0.999834	1569	2	-0.23627\	0.479211
NTC_new_8	6	0.22892	0.43523	0.999997	831	3	-0.11049	0.71737	0.83749	0.999834	1572	2	-0.11049\	0.479211
NTC_new_904	6	0.1091	0.26539	0.98132	512	1	-0.041871	0.71737	0.83749	0.999834	1571	2	-0.041871\	0.479211
SMARCD3	6	0.055419	0.16011	0.898904	338	3	-0.31533	0.71985	0.8389	0.999834	1573	2	-0.31533\	0.474232
USP36	6	0.14129	0.32396	0.986369	628	4	-0.2069	0.72194	0.84012	0.999834	1574	2	-0.2069\	0.470049
NTC_new_1068	6	0.013306	0.050296	0.732989	97	5	-0.3274	0.72287	0.84068	0.999834	1576	1	-0.3274\	0.468192
NTC_new_153	6	0.013306	0.050296	0.732989	96	5	-0.27895	0.72287	0.84068	0.999834	1575	1	-0.27895\	0.468192
NTC_new_524	6	0.0091734	0.036714	0.732989	75	5	-0.23479	0.72287	0.84068	0.999834	1577	1	-0.23479\	0.468192
EXOSC6	6	0.14108	0.32357	0.986369	627	4	-0.34354	0.72499	0.84202	0.999834	1578	1	-0.34354\	0.463967
MBD6	6	0.27316	0.48464	0.999997	928	2	-0.084753	0.72605	0.84265	0.999834	1579	2	-0.084753\	0.461859
NTC_new_1021	6	0.25037	0.45953	0.999997	875	3	-0.14383	0.72654	0.8429	0.999834	1580	2	-0.14383\	0.460886
NTC_new_49	6	0.15193	0.34264	0.987568	664	4	-0.17356	0.72654	0.8429	0.999834	1582	2	-0.17356\	0.460886
NTC_new_636	6	0.7816	0.85901	0.999997	1637	1	-0.051659	0.72654	0.8429	0.999834	1583	2	-0.051659\	0.460886
NTC_new_7	6	0.11108	0.26928	0.982617	529	4	-0.27069	0.72654	0.8429	0.999834	1584	2	-0.27069\	0.460886
NTC_new_898	6	0.14688	0.33374	0.986569	654	3	-0.1789	0.72654	0.8429	0.999834	1581	2	-0.1789\	0.460886
NTC_new_128	6	0.3873	0.60603	0.999997	1162	3	-0.063081	0.72832	0.84392	0.999834	1585	2	-0.063081\	0.457356
NTC_new_315	6	0.30555	0.51996	0.999997	995	3	-0.19391	0.72832	0.84392	0.999834	1587	2	-0.19391\	0.457356
NTC_new_479	6	0.2214	0.4267	0.999997	815	3	-0.12125	0.72832	0.84392	0.999834	1586	1	-0.12125\	0.457356
H2BFM	6	0.24498	0.45344	0.999997	863	3	-0.10552	0.72889	0.84427	0.999834	1588	2	-0.10552\	0.456227
NTC_new_107	6	0.36569	0.5835	0.999997	1109	3	-0.026509	0.73255	0.84646	0.999834	1589	2	-0.026509\	0.449001
NTC_new_661	6	0.042541	0.13316	0.882013	278	3	-0.22352	0.73255	0.84646	0.999834	1590	2	-0.22352\	0.449001
NTC_new_655	6	0.91698	0.92144	0.999997	1748	1	0.010596	0.73385	0.84709	0.999834	1591	2	0.010596\	0.446443
SAP30	6	0.50078	0.68849	0.999997	1309	2	-0.10296	0.7379	0.84957	0.999834	1592	2	-0.10296\	0.438503
NTC_new_181	6	0.62896	0.76868	0.999997	1452	2	-0.085719	0.73836	0.84989	0.999834	1594	1	-0.085719\	0.437604
NTC_new_834	6	0.37572	0.59388	0.999997	1134	2	-0.030946	0.73836	0.84989	0.999834	1593	1	-0.030946\	0.437604
TET3	6	0.092277	0.23285	0.97443	459	3	-0.18136	0.73877	0.85018	0.999834	1595	2	-0.18136\	0.436803
NTC_new_1084	6	0.16194	0.35792	0.989288	695	2	-0.013834	0.7427	0.85264	0.999834	1601	2	-0.013834\	0.429149
NTC_new_419	6	0.25095	0.46014	0.999997	876	2	-0.0049855	0.7427	0.85264	0.999834	1599	2	-0.0049855\	0.429149
NTC_new_654	6	0.39867	0.61771	0.999997	1179	2	-0.019749	0.7427	0.85264	0.999834	1598	2	-0.019749\	0.429149
NTC_new_70	6	0.081198	0.21145	0.942248	431	4	-0.25239	0.7427	0.85264	0.999834	1596	2	-0.25239\	0.429149
NTC_new_798	6	0.42749	0.64526	0.999997	1233	2	0.044658	0.7427	0.85264	0.999834	1597	2	0.044658\	0.429149
NTC_new_864	6	0.0031436	0.015484	0.696408	43	4	-0.31746	0.7427	0.85264	0.999834	1600	2	-0.31746\	0.429149
HMGN2	6	0.29351	0.50689	0.999997	975	2	-0.13077	0.74314	0.85288	0.999834	1602	1	-0.13077\	0.428294
NTC_new_574	6	0.0456	0.13955	0.882013	297	3	-0.15585	0.74703	0.8552	0.999834	1604	2	-0.15585\	0.420762
NTC_new_657	6	0.013917	0.05241	0.732989	104	4	-0.39014	0.74703	0.8552	0.999834	1603	1	-0.39014\	0.420762
STK4	6	0.020847	0.075013	0.848387	171	4	-0.27026	0.74926	0.85658	0.999834	1605	2	-0.27026\	0.416462
EPC1	6	0.024288	0.085687	0.882013	185	3	-0.16719	0.75038	0.85735	0.999834	1606	2	-0.16719\	0.414307
PRKAA2	6	0.079134	0.20719	0.940953	421	2	0.02269	0.75066	0.85758	0.999834	1607	2	0.02269\	0.413768
ATF2	6	0.49978	0.68792	0.999997	1307	2	-0.066246	0.7508	0.85768	0.999834	1608	2	-0.066246\	0.413499
NTC_new_249	6	0.10261	0.25335	0.98132	493	3	-0.12658	0.75305	0.85921	0.999834	1611	2	-0.12658\	0.409182
NTC_new_385	6	0.22471	0.43053	0.999997	822	3	-0.097957	0.75305	0.85921	0.999834	1610	2	-0.097957\	0.409182
NTC_new_402	6	0.01613	0.059844	0.766474	150	5	-0.32179	0.75305	0.85921	0.999834	1609	1	-0.32179\	0.409182
NTC_new_464	6	0.049416	0.14769	0.894038	316	4	-0.35027	0.75305	0.85921	0.999834	1612	1	-0.35027\	0.409182
NTC_new_594	6	0.5598	0.72463	0.999997	1367	2	0.05479	0.75305	0.85921	0.999834	1613	2	0.05479\	0.409182
NTC_new_175	6	0.099888	0.24793	0.98132	483	4	-0.23383	0.75385	0.85969	0.999834	1614	2	-0.23383\	0.407651
NTC_new_423	6	0.42028	0.63945	0.999997	1224	3	-0.070593	0.75385	0.85969	0.999834	1616	2	-0.070593\	0.407651
NTC_new_532	6	0.51029	0.69443	0.999997	1318	1	0.057779	0.75385	0.85969	0.999834	1618	2	0.057779\	0.407651
NTC_new_732	6	0.13222	0.3079	0.986369	593	3	-0.15601	0.75385	0.85969	0.999834	1615	2	-0.15601\	0.407651
NTC_new_873	6	0.014835	0.0556	0.746734	144	4	-0.34944	0.75385	0.85969	0.999834	1617	2	-0.34944\	0.407651
CBX6	6	0.075269	0.19963	0.939402	410	3	-0.20884	0.75681	0.86161	0.999834	1619	1	-0.20884\	0.401997
NTC_new_325	6	0.98113	0.98087	0.999997	1869	0	0.1044	0.75792	0.86231	0.999834	1622	2	0.1044\	0.399883
NTC_new_369	6	0.63454	0.7724	0.999997	1458	2	0.021804	0.75792	0.86231	0.999834	1620	2	0.021804\	0.399883
NTC_new_470	6	0.014122	0.053101	0.732989	132	3	-0.097855	0.75792	0.86231	0.999834	1621	2	-0.097855\	0.399883
NTC_new_777	6	0.93396	0.93455	0.999997	1774	1	0.08021	0.75792	0.86231	0.999834	1623	2	0.08021\	0.399883
NTC_new_1025	6	0.01941	0.070461	0.836026	163	5	-0.30976	0.76154	0.86437	0.999834	1628	1	-0.30976\	0.393008
NTC_new_33	6	0.025274	0.088436	0.882013	190	5	-0.28786	0.76154	0.86437	0.999834	1625	1	-0.28786\	0.393008
NTC_new_363	6	0.081198	0.21145	0.942248	432	4	-0.21649	0.76154	0.86437	0.999834	1624	2	-0.21649\	0.393008
NTC_new_480	6	0.2214	0.4267	0.999997	811	3	-0.14518	0.76154	0.86437	0.999834	1627	1	-0.14518\	0.393008
NTC_new_788	6	0.41299	0.6319	0.999997	1208	3	-0.046895	0.76154	0.86437	0.999834	1626	2	-0.046895\	0.393008
NTC_new_85	6	0.15193	0.34264	0.987568	669	4	-0.16304	0.76268	0.86504	0.999834	1629	2	-0.16304\	0.39085
HIST1H2BA	6	0.051321	0.15164	0.897595	324	4	-0.16362	0.76512	0.86648	0.999834	1630	1	-0.16362\	0.386242
JMJD1C	6	0.38405	0.60249	0.999997	1155	2	-0.0068758	0.76604	0.867	0.999834	1631	1	-0.0068758\	0.384508
NTC_new_102	6	0.47437	0.67291	0.999997	1281	2	-0.079067	0.76692	0.8675	0.999834	1635	2	-0.079067\	0.382852
NTC_new_247	6	0.16797	0.36495	0.99551	709	3	-0.22859	0.76692	0.8675	0.999834	1634	2	-0.22859\	0.382852
NTC_new_329	6	0.029809	0.10151	0.882013	218	3	-0.1706	0.76692	0.8675	0.999834	1632	2	-0.1706\	0.382852
NTC_new_949	6	0.30071	0.51481	0.999997	991	3	-0.14007	0.76692	0.8675	0.999834	1633	2	-0.14007\	0.382852
UBR2	6	0.38342	0.60189	0.999997	1153	2	0.052966	0.77118	0.8703	0.999834	1636	2	0.052966\	0.37486
PELP1	6	0.29484	0.50841	0.999997	978	3	-0.275	0.77184	0.87068	0.999834	1637	2	-0.275\	0.373626
NTC_new_334	6	0.050269	0.14942	0.894038	321	4	-0.27074	0.77228	0.87091	0.999834	1638	1	-0.27074\	0.372804
FOXO1	6	0.17896	0.378	0.999997	724	2	-0.049392	0.7725	0.87106	0.999834	1639	2	-0.049392\	0.372393
NTC_new_1047	6	0.13349	0.31018	0.986369	597	4	-0.18135	0.77467	0.87264	0.999834	1641	2	-0.18135\	0.368346
NTC_new_156	6	0.19907	0.4013	0.999997	768	3	-0.19417	0.77467	0.87264	0.999834	1640	2	-0.19417\	0.368346
NTC_new_359	6	0.13957	0.32073	0.986369	625	4	-0.17851	0.77467	0.87264	0.999834	1642	2	-0.17851\	0.368346
NTC_new_830	6	0.039062	0.12538	0.882013	270	4	-0.35286	0.77735	0.87444	0.999834	1643	1	-0.35286\	0.363364
MBD5	6	0.16971	0.36702	0.996934	713	2	0.081385	0.77773	0.87463	0.999834	1644	2	0.081385\	0.362659
SETD1B	6	0.3247	0.54058	0.999997	1035	3	-0.096292	0.77812	0.87496	0.999834	1645	2	-0.096292\	0.361935
CDY1	6	0.5634	0.72695	0.999997	1369	2	0.039117	0.77871	0.87539	0.999834	1647	2	0.039117\	0.360842
CDY1B	6	0.5634	0.72695	0.999997	1370	2	0.039117	0.77871	0.87539	0.999834	1646	2	0.039117\	0.360842
NTC_new_606	6	0.61645	0.76041	0.999997	1437	1	-0.042597	0.78045	0.87663	0.999834	1648	2	-0.042597\	0.357622
NTC_new_919	6	0.23473	0.44175	0.999997	846	3	-0.075549	0.78045	0.87663	0.999834	1649	2	-0.075549\	0.357622
NTC_new_681	6	0.10824	0.26389	0.98132	504	3	-0.20032	0.78146	0.8772	0.999834	1651	1	-0.20032\	0.355756
NTC_new_842	6	0.014122	0.053101	0.732989	133	4	-0.18674	0.78146	0.8772	0.999834	1650	1	-0.18674\	0.355756
GADD45G	6	0.053769	0.15655	0.898904	332	3	-0.17242	0.78263	0.87809	0.999834	1652	2	-0.17242\	0.353598
NTC_new_229	6	0.93104	0.93221	0.999997	1767	1	0.023651	0.78493	0.87943	0.999834	1655	2	0.023651\	0.349364
NTC_new_555	6	0.063428	0.17589	0.898904	366	4	-0.30563	0.78493	0.87943	0.999834	1653	2	-0.30563\	0.349364
NTC_new_755	6	0.82327	0.87352	0.999997	1663	1	0.054397	0.78493	0.87943	0.999834	1654	2	0.054397\	0.349364
NTC_new_79	6	0.081198	0.21145	0.942248	433	4	-0.22735	0.78493	0.87943	0.999834	1656	2	-0.22735\	0.349364
NTC_new_463	6	0.68048	0.80387	0.999997	1523	2	-0.046914	0.78814	0.88166	0.999834	1659	1	-0.046914\	0.343476
NTC_new_549	6	0.13957	0.32073	0.986369	624	4	-0.17716	0.78814	0.88166	0.999834	1657	1	-0.17716\	0.343476
NTC_new_945	6	0.14864	0.33699	0.987568	657	4	-0.18348	0.78814	0.88166	0.999834	1658	1	-0.18348\	0.343476
TFDP1	6	0.098257	0.24486	0.98132	478	2	-0.064397	0.79048	0.88323	0.999834	1660	2	-0.064397\	0.339199
PHC1	6	0.024062	0.085026	0.882013	183	3	-0.25524	0.79228	0.88442	0.999834	1661	1	-0.25524\	0.335918
EZH1	6	0.34982	0.56717	0.999997	1082	2	0.0060962	0.79298	0.88479	0.999834	1662	1	0.0060962\	0.334644
NTC_new_1006	6	0.13664	0.31584	0.986369	613	4	-0.2284	0.79359	0.88527	0.999834	1664	2	-0.2284\	0.333534
NTC_new_264	6	0.085386	0.21968	0.948362	441	3	-0.15146	0.79359	0.88527	0.999834	1666	2	-0.15146\	0.333534
NTC_new_353	6	0.35618	0.57352	0.999997	1088	3	-0.040643	0.79359	0.88527	0.999834	1663	2	-0.040643\	0.333534
NTC_new_395	6	0.073829	0.19672	0.936887	404	3	-0.15588	0.79359	0.88527	0.999834	1665	2	-0.15588\	0.333534
KDM4E	6	0.024348	0.085953	0.882013	186	4	-0.47133	0.79409	0.88555	0.999834	1667	1	-0.47133\	0.332626
NTC_new_1063	6	0.01453	0.05454	0.737624	143	5	-0.34433	0.7965	0.88712	0.999834	1668	1	-0.34433\	0.328254
NTC_new_652	6	0.15131	0.34168	0.987568	662	3	-0.17687	0.7965	0.88712	0.999834	1669	2	-0.17687\	0.328254
LAS1L	6	0.020192	0.073042	0.840847	168	5	-0.62879	0.79848	0.88855	0.999834	1670	1	-0.62879\	0.324672
NTC_new_885	6	0.032337	0.10902	0.882013	235	4	-0.3655	0.7999	0.88951	0.999834	1671	1	-0.3655\	0.322108
NTC_new_119	6	0.61971	0.76244	0.999997	1440	2	0.062868	0.79991	0.88951	0.999834	1674	2	0.062868\	0.32209
NTC_new_17	6	0.36071	0.57842	0.999997	1094	3	-0.11007	0.79991	0.88951	0.999834	1673	2	-0.11007\	0.32209
NTC_new_32	6	0.042541	0.13316	0.882013	279	2	0.035233	0.79991	0.88951	0.999834	1672	2	0.035233\	0.32209
DDX50	6	0.10965	0.26639	0.98132	525	4	-0.23415	0.80203	0.891	0.999834	1675	2	-0.23415\	0.318272
PPM1G	6	0.67851	0.80261	0.999997	1521	1	-0.081513	0.80226	0.89116	0.999834	1676	1	-0.081513\	0.317858
NTC_new_12	6	0.45967	0.66441	0.999997	1265	2	0.014193	0.80383	0.89219	0.999834	1678	2	0.014193\	0.315038
NTC_new_729	6	0.59275	0.74489	0.999997	1399	2	0.032682	0.80383	0.89219	0.999834	1677	2	0.032682\	0.315038
HIST3H2A	6	0.007694	0.031835	0.732989	69	5	-0.41489	0.8065	0.89405	0.999834	1679	1	-0.41489\	0.310254
SUPT16H	6	0.34066	0.55797	0.999997	1061	3	-0.22848	0.80689	0.89433	0.999834	1680	1	-0.22848\	0.309556
HIST1H2BG	6	0.031352	0.10613	0.882013	230	3	-0.1753	0.80705	0.89443	0.999834	1681	2	-0.1753\	0.30927
PRDM2	6	0.031583	0.10682	0.882013	232	4	-0.42283	0.80765	0.8949	0.999834	1682	2	-0.42283\	0.308198
CREBBP	6	0.3436	0.56104	0.999997	1066	3	-0.25699	0.80906	0.89581	0.999834	1683	2	-0.25699\	0.305681
POLR2A	6	0.018563	0.067646	0.815701	160	5	-0.94494	0.80989	0.89615	0.999834	1684	1	-0.94494\	0.304202
NTC_new_100	6	0.089265	0.22712	0.965368	453	3	-0.25689	0.81215	0.89669	0.999834	1685	1	-0.25689\	0.300182
CDY2A	6	0.38163	0.59982	0.999997	1150	2	-0.03888	0.81533	0.89748	0.999834	1686	1	-0.03888\	0.294544
CDY2B	6	0.38163	0.59982	0.999997	1149	2	-0.03888	0.81533	0.89748	0.999834	1687	1	-0.03888\	0.294544
CBX1	6	0.2629	0.47347	0.999997	903	3	-0.18715	0.81577	0.89758	0.999834	1688	1	-0.18715\	0.293766
EXOSC1	6	0.2838	0.49629	0.999997	958	2	-0.054918	0.81653	0.89777	0.999834	1689	1	-0.054918\	0.292422
PRDM8	6	0.10256	0.25327	0.98132	489	3	-0.26912	0.81753	0.89796	0.999834	1690	1	-0.26912\	0.290656
NTC_new_467	6	0.12816	0.30072	0.986369	585	4	-0.12895	0.8194	0.89848	0.999834	1691	1	-0.12895\	0.28736
GATAD2A	6	0.0030831	0.015218	0.696408	42	5	-0.6661	0.82125	0.89899	0.999834	1692	1	-0.6661\	0.284107
NTC_new_600	6	0.013345	0.050444	0.732989	99	5	-0.51919	0.82285	0.89932	0.999834	1694	1	-0.51919\	0.281299
NTC_new_851	6	0.69867	0.81599	0.999997	1548	2	-0.0019674	0.82285	0.89932	0.999834	1693	1	-0.0019674\	0.281299
UBE2A	6	0.033943	0.11402	0.882013	248	4	-0.33166	0.82491	0.89998	0.999834	1695	1	-0.33166\	0.277691
NTC_new_701	6	0.1244	0.29395	0.986369	563	4	-0.18649	0.83128	0.90179	0.999834	1696	1	-0.18649\	0.266594
CDK17	6	0.091767	0.23176	0.97443	458	3	-0.29421	0.83274	0.90223	0.999834	1697	1	-0.29421\	0.264062
NTC_new_1045	6	0.42028	0.63945	0.999997	1222	3	-0.070593	0.83563	0.90298	0.999834	1699	1	-0.070593\	0.259064
NTC_new_514	6	0.0055429	0.024453	0.732989	54	4	-0.72336	0.83563	0.90298	0.999834	1698	1	-0.72336\	0.259064
SMARCA4	6	0.35604	0.57343	0.999997	1087	1	0.040352	0.83689	0.90331	0.999834	1700	1	0.040352\	0.25689
TDRD12	6	0.40021	0.6193	0.999997	1185	3	-0.12332	0.83746	0.90352	0.999834	1701	1	-0.12332\	0.255908
MLLT6	6	0.6026	0.75141	0.999997	1411	2	-0.079648	0.83927	0.90408	0.999834	1702	1	-0.079648\	0.252793
TRIM27	6	0.018761	0.068327	0.815701	162	5	-0.34247	0.83994	0.90427	0.999834	1703	1	-0.34247\	0.251642
UBE2B	6	0.26274	0.47329	0.999997	902	3	-0.037767	0.84006	0.90429	0.999834	1704	1	-0.037767\	0.251436
EXOSC8	6	0.61429	0.75907	0.999997	1432	2	0.012619	0.84039	0.90439	0.999834	1705	1	0.012619\	0.250869
NTC_new_1043	6	0.15193	0.34264	0.987568	667	4	-0.20824	0.84339	0.90523	0.999834	1707	1	-0.20824\	0.245728
NTC_new_66	6	0.0067903	0.028636	0.732989	63	4	-0.48004	0.84339	0.90523	0.999834	1706	1	-0.48004\	0.245728
GTF2I	6	0.15031	0.33982	0.987568	660	4	-0.18213	0.84493	0.90565	0.999834	1708	1	-0.18213\	0.243096
NTC_new_68	6	0.51029	0.69443	0.999997	1316	2	-0.072284	0.852	0.90776	0.999834	1709	1	-0.072284\	0.231075
AURKC	6	0.042852	0.13381	0.882013	285	4	-0.35442	0.85316	0.90814	0.999834	1710	1	-0.35442\	0.229112
PARP1	6	0.13521	0.31324	0.986369	605	4	-0.23305	0.85409	0.90837	0.999834	1711	1	-0.23305\	0.22754
NTC_new_321	6	0.13664	0.31584	0.986369	612	4	-0.29163	0.85528	0.90867	0.999834	1714	1	-0.29163\	0.225531
NTC_new_472	6	0.064326	0.17755	0.898904	374	4	-0.137	0.85528	0.90867	0.999834	1713	1	-0.137\	0.225531
NTC_new_617	6	0.54551	0.71601	0.999997	1355	2	-0.070732	0.85528	0.90867	0.999834	1712	1	-0.070732\	0.225531
NTC_new_4	6	0.37243	0.59034	0.999997	1129	3	-0.088146	0.8583	0.90953	0.999834	1715	1	-0.088146\	0.220446
NTC_new_658	6	0.10824	0.26389	0.98132	506	3	-0.19518	0.86077	0.91028	0.999834	1717	1	-0.19518\	0.2163
NTC_new_776	6	0.29143	0.50451	0.999997	969	3	-0.089346	0.86077	0.91028	0.999834	1716	1	-0.089346\	0.2163
NTC_new_431	6	0.1152	0.27708	0.986369	535	2	-0.068012	0.86437	0.91146	0.999834	1718	1	-0.068012\	0.210279
NTC_new_69	6	0.20127	0.40378	0.999997	778	2	-0.03078	0.86437	0.91146	0.999834	1719	1	-0.03078\	0.210279
NTC_new_760	6	0.079488	0.20788	0.940953	422	3	-0.068255	0.86437	0.91146	0.999834	1720	1	-0.068255\	0.210279
HMGN3	6	0.32389	0.53972	0.999997	1034	3	-0.082446	0.86574	0.91196	0.999834	1721	1	-0.082446\	0.207994
RBX1	6	0.0011518	0.0059974	0.588538	16	5	-0.64061	0.86661	0.91224	0.999834	1722	1	-0.64061\	0.206545
KDM4C	6	0.3811	0.59929	0.999997	1148	2	-0.071952	0.86957	0.91317	0.999834	1723	1	-0.071952\	0.201626
ACTB	6	0.0029744	0.014757	0.696408	39	5	-0.86541	0.87126	0.91364	0.999834	1724	1	-0.86541\	0.198825
HDAC11	6	0.02064	0.074342	0.845748	170	5	-0.263	0.87219	0.91393	0.999834	1725	1	-0.263\	0.197286
BRPF1	6	0.0070371	0.029434	0.732989	64	4	-0.37987	0.87377	0.91454	0.999834	1726	1	-0.37987\	0.194675
PRDM13	6	0.28391	0.49641	0.999997	959	3	-0.12079	0.87505	0.91494	0.999834	1727	1	-0.12079\	0.192563
NTC_new_567	6	0.70634	0.82153	0.999997	1559	2	-0.050277	0.87884	0.91631	0.999834	1731	1	-0.050277\	0.186328
NTC_new_649	6	0.26693	0.47795	0.999997	907	3	-0.15233	0.87884	0.91631	0.999834	1728	1	-0.15233\	0.186328
NTC_new_752	6	0.0015014	0.0076868	0.588538	23	4	-0.40561	0.87884	0.91631	0.999834	1729	1	-0.40561\	0.186328
NTC_new_790	6	0.27996	0.49212	0.999997	942	3	-0.17026	0.87884	0.91631	0.999834	1730	1	-0.17026\	0.186328
PHC2	6	0.047357	0.14346	0.889296	311	4	-0.33188	0.88025	0.91666	0.999834	1732	1	-0.33188\	0.184015
PRKAB2	6	0.1541	0.3465	0.989288	675	3	-0.1086	0.88034	0.91669	0.999834	1733	1	-0.1086\	0.183867
NTC_new_73	6	0.64821	0.78163	0.999997	1476	2	-0.042597	0.882	0.91734	0.999834	1734	1	-0.042597\	0.181149
NTC_new_1	6	0.26693	0.47795	0.999997	905	3	-0.19505	0.88595	0.91888	0.999834	1735	1	-0.19505\	0.174703
NTC_new_277	6	0.029551	0.10077	0.882013	212	3	-0.36339	0.88595	0.91888	0.999834	1737	1	-0.36339\	0.174703
NTC_new_396	6	0.2053	0.4084	0.999997	786	3	-0.07831	0.88595	0.91888	0.999834	1736	1	-0.07831\	0.174703
NTC_new_91	6	0.011108	0.043216	0.732989	86	5	-0.42024	0.88595	0.91888	0.999834	1738	1	-0.42024\	0.174703
NTC_new_245	6	0.042541	0.13316	0.882013	283	3	-0.08261	0.88892	0.92013	0.999834	1740	1	-0.08261\	0.169875
NTC_new_916	6	0.33189	0.5484	0.999997	1044	3	-0.060023	0.88892	0.92013	0.999834	1739	1	-0.060023\	0.169875
PIWIL4	6	0.22519	0.43114	0.999997	823	3	-0.16289	0.89142	0.92111	0.999834	1741	1	-0.16289\	0.165823
YWHAZ	6	0.017083	0.063064	0.791025	154	3	-0.64413	0.89223	0.92147	0.999834	1742	1	-0.64413\	0.164512
NTC_new_1010	6	0.064326	0.17755	0.898904	375	3	-0.15522	0.89613	0.92296	0.999834	1744	1	-0.15522\	0.15822
NTC_new_269	6	0.18545	0.3854	0.999997	737	2	-0.074369	0.89613	0.92296	0.999834	1743	1	-0.074369\	0.15822
TONSL	6	0.38965	0.60846	0.999997	1166	2	-0.13507	0.89737	0.92348	0.999834	1745	1	-0.13507\	0.156225
NTC_new_444	6	0.0456	0.13955	0.882013	295	4	-0.28573	0.90017	0.92463	0.999834	1746	1	-0.28573\	0.151731
NTC_new_879	6	0.066248	0.18135	0.912597	383	4	-0.23486	0.90017	0.92463	0.999834	1747	1	-0.23486\	0.151731
NTC_new_368	6	0.00074706	0.0040725	0.588538	11	3	-0.32642	0.90205	0.92544	0.999834	1749	1	-0.32642\	0.148721
NTC_new_543	6	0.1453	0.331	0.986369	647	2	-0.083798	0.90205	0.92544	0.999834	1748	1	-0.083798\	0.148721
TDRD6	6	0.34118	0.55847	0.999997	1063	3	-0.1094	0.90297	0.92579	0.999834	1750	1	-0.1094\	0.14725
UBE2N	1	0.09604	0.096658	0.882013	470	1	-0.66087	0.90396	0.90463	0.999834	1751	0	-0.66087\	0.145669
KDM5D	6	0.074244	0.19761	0.936887	406	2	-0.009085	0.904	0.92637	0.999834	1752	1	-0.009085\	0.145605
CDK3	6	0.026815	0.092792	0.882013	196	4	-0.35101	0.90481	0.92673	0.999834	1753	1	-0.35101\	0.144313
SHPRH	6	0.72683	0.83644	0.999997	1589	2	0.050973	0.90832	0.92822	0.999834	1754	1	0.050973\	0.138727
APBB1	6	0.0073939	0.030735	0.732989	67	4	-0.59712	0.90979	0.92885	0.999834	1755	1	-0.59712\	0.136395
NTC_new_133	6	0.19545	0.39708	0.999997	757	3	-0.17909	0.91107	0.92935	0.999834	1758	1	-0.17909\	0.134366
NTC_new_508	6	0.029809	0.10151	0.882013	217	4	-0.35744	0.91107	0.92935	0.999834	1759	1	-0.35744\	0.134366
NTC_new_536	6	0.00057148	0.0032278	0.588538	10	5	-0.52642	0.91107	0.92935	0.999834	1756	1	-0.52642\	0.134366
NTC_new_83	6	0.050269	0.14942	0.894038	319	4	-0.31745	0.91107	0.92935	0.999834	1757	1	-0.31745\	0.134366
KEAP1	6	0.079638	0.20824	0.940953	427	4	-0.25501	0.91267	0.93018	0.999834	1760	1	-0.25501\	0.131835
HIST1H4A	6	0.13505	0.31293	0.986369	603	2	-0.14221	0.91308	0.93042	0.999834	1761	1	-0.14221\	0.131187
TNP2	6	0.02631	0.091379	0.882013	194	3	-0.303	0.91429	0.93105	0.999834	1762	1	-0.303\	0.129276
NTC_new_257	6	0.046604	0.14172	0.882255	307	3	-0.060971	0.91577	0.93186	0.999834	1763	1	-0.060971\	0.126943
NTC_new_807	6	0.039062	0.12538	0.882013	269	4	-0.29997	0.91792	0.93291	0.999834	1764	1	-0.29997\	0.12356
HDGF	6	0.10343	0.25491	0.98132	495	3	-0.18421	0.91929	0.93361	0.999834	1765	1	-0.18421\	0.121408
NOC2L	6	0.32282	0.53856	0.999997	1030	3	-0.21159	0.92024	0.93405	0.999834	1766	1	-0.21159\	0.119918
NTC_new_527	6	0.10824	0.26389	0.98132	505	3	-0.19133	0.92124	0.93457	0.999834	1768	1	-0.19133\	0.118351
NTC_new_696	6	0.0052644	0.023286	0.732989	52	4	-0.5016	0.92124	0.93457	0.999834	1767	1	-0.5016\	0.118351
NTC_new_258	6	0.012125	0.046482	0.732989	89	4	-0.39899	0.92299	0.93546	0.999834	1771	1	-0.39899\	0.115613
NTC_new_907	6	0.61095	0.75698	0.999997	1425	1	-0.08367	0.92299	0.93546	0.999834	1770	1	-0.08367\	0.115613
NTC_new_995	6	0.26693	0.47795	0.999997	906	3	-0.12602	0.92299	0.93546	0.999834	1769	1	-0.12602\	0.115613
RAD54L	6	0.027825	0.095746	0.882013	203	3	-0.23536	0.92393	0.93595	0.999834	1772	1	-0.23536\	0.114145
NTC_new_548	6	0.1907	0.39146	0.999997	754	3	-0.13158	0.92534	0.93675	0.999834	1773	1	-0.13158\	0.111945
NTC_new_167	6	0.48259	0.67772	0.999997	1289	2	-0.058224	0.92763	0.93805	0.999834	1775	1	-0.058224\	0.108379
NTC_new_462	6	0.079488	0.20788	0.940953	423	3	-0.111	0.92763	0.93805	0.999834	1774	1	-0.111\	0.108379
NTC_new_377	6	0.1652	0.36178	0.992465	704	3	-0.15731	0.92904	0.93886	0.999834	1776	1	-0.15731\	0.106187
SMARCC2	6	0.38862	0.60744	0.999997	1164	2	-0.11167	0.92966	0.93922	0.999834	1777	1	-0.11167\	0.105225
HDAC4	6	0.62492	0.76591	0.999997	1448	2	-0.052235	0.93039	0.93959	0.999834	1778	1	-0.052235\	0.104093
NTC_new_771	6	0.12166	0.28877	0.986369	556	4	-0.18678	0.9314	0.94021	0.999834	1781	1	-0.18678\	0.102527
NTC_new_839	6	0.03363	0.11315	0.882013	242	5	-0.30865	0.9314	0.94021	0.999834	1782	1	-0.30865\	0.102527
NTC_new_894	6	0.2214	0.4267	0.999997	818	2	-0.068719	0.9314	0.94021	0.999834	1779	1	-0.068719\	0.102527
NTC_new_923	6	0.13349	0.31018	0.986369	598	4	-0.24392	0.9314	0.94021	0.999834	1780	1	-0.24392\	0.102527
ZHX1	6	0.21586	0.42056	0.999997	804	3	-0.20431	0.93255	0.94088	0.999834	1783	1	-0.20431\	0.100747
SCMH1	6	0.030586	0.10379	0.882013	223	5	-0.23444	0.93304	0.94113	0.999834	1784	1	-0.23444\	0.0999892
MSL1	6	0.034366	0.11522	0.882013	250	4	-0.45412	0.93331	0.94122	0.999834	1785	1	-0.45412\	0.0995717
NTC_new_58	6	0.15642	0.35028	0.989288	680	4	-0.14696	0.93449	0.94186	0.999834	1786	1	-0.14696\	0.0977489
NTC_new_680	6	0.1265	0.29773	0.986369	570	4	-0.17356	0.93449	0.94186	0.999834	1787	1	-0.17356\	0.0977489
NTC_new_1051	6	0.69867	0.81599	0.999997	1547	2	-0.067524	0.93605	0.94289	0.999834	1788	1	-0.067524\	0.0953425
NTC_new_730	6	0.39233	0.61119	0.999997	1171	3	-0.050513	0.93605	0.94289	0.999834	1789	1	-0.050513\	0.0953425
MGA	6	0.014214	0.053393	0.732989	140	5	-0.46369	0.93696	0.94344	0.999834	1790	1	-0.46369\	0.0939406
ZCWPW1	6	0.037224	0.12153	0.882013	261	4	-0.38576	0.93701	0.94345	0.999834	1791	1	-0.38576\	0.0938637
NTC_new_827	6	0.13957	0.32073	0.986369	626	4	-0.2395	0.93755	0.94387	0.999834	1792	1	-0.2395\	0.0930325
H2AFX	6	0.18027	0.37953	0.999997	730	3	-0.1041	0.93824	0.94422	0.999834	1793	1	-0.1041\	0.0919711
USP3	6	0.040614	0.12885	0.882013	272	4	-0.3818	0.93935	0.9449	0.999834	1794	1	-0.3818\	0.0902653
ANP32B	6	0.70279	0.81884	0.999997	1555	2	-0.0018263	0.9396	0.94503	0.999834	1795	1	-0.0018263\	0.0898814
NTC_new_442	6	0.013345	0.050444	0.732989	98	4	-0.60767	0.94064	0.94572	0.999834	1798	1	-0.60767\	0.0882854
NTC_new_476	6	0.072261	0.19361	0.932503	400	4	-0.266	0.94064	0.94572	0.999834	1797	1	-0.266\	0.0882854
NTC_new_778	6	0.38184	0.60008	0.999997	1151	3	-0.07307	0.94064	0.94572	0.999834	1796	1	-0.07307\	0.0882854
NTC_new_263	6	0.085386	0.21968	0.948362	443	4	-0.21348	0.94262	0.94697	0.999834	1801	1	-0.21348\	0.0852518
NTC_new_339	6	0.1091	0.26539	0.98132	516	2	-0.086955	0.94262	0.94697	0.999834	1800	1	-0.086955\	0.0852518
NTC_new_585	6	0.18899	0.38945	0.999997	740	3	-0.1137	0.94262	0.94697	0.999834	1799	1	-0.1137\	0.0852518
BRD1	6	0.073237	0.19557	0.936219	403	4	-0.35262	0.94413	0.94813	0.999834	1802	1	-0.35262\	0.0829426
NTC_new_306	6	0.0038025	0.018115	0.732989	44	5	-0.54953	0.9459	0.94936	0.999834	1803	1	-0.54953\	0.0802404
NTC_new_330	6	0.25442	0.46408	0.999997	890	3	-0.11253	0.9459	0.94936	0.999834	1804	1	-0.11253\	0.0802404
NTC_new_89	6	0.073829	0.19672	0.936887	405	4	-0.2691	0.94727	0.9502	0.999834	1805	1	-0.2691\	0.0781524
HLTF	6	0.34567	0.56307	0.999997	1071	3	-0.10762	0.94785	0.95052	0.999834	1806	1	-0.10762\	0.0772693
BAZ2A	6	0.11921	0.28441	0.986369	550	3	-0.13042	0.94794	0.95057	0.999834	1807	1	-0.13042\	0.0771323
NTC_new_796	6	0.30555	0.51996	0.999997	997	3	-0.1715	0.94942	0.95163	0.999834	1808	1	-0.1715\	0.0748817
NTC_new_876	6	0.016943	0.062705	0.791025	153	5	-0.38094	0.94942	0.95163	0.999834	1809	1	-0.38094\	0.0748817
NTC_new_328	6	0.063428	0.17589	0.898904	365	4	-0.29019	0.95067	0.95261	0.999834	1810	1	-0.29019\	0.0729835
NTC_new_483	6	0.014122	0.053101	0.732989	122	4	-0.23383	0.95213	0.95368	0.999834	1811	1	-0.23383\	0.0707695
NTC_new_129	6	0.024226	0.085513	0.882013	184	5	-0.27672	0.9534	0.95467	0.999834	1813	1	-0.27672\	0.0688465
NTC_new_39	6	0.0062553	0.026818	0.732989	58	5	-0.54981	0.9534	0.95467	0.999834	1812	1	-0.54981\	0.0688465
NTC_new_584	6	0.022798	0.08113	0.87657	179	5	-0.36456	0.9534	0.95467	0.999834	1814	1	-0.36456\	0.0688465
SPEN	6	0.055741	0.16074	0.898904	339	3	-0.46246	0.95479	0.95591	0.999834	1815	1	-0.46246\	0.0667446
NTC_new_785	6	0.00022605	0.001395	0.484441	5	5	-0.53013	0.9557	0.95663	0.999834	1816	1	-0.53013\	0.0653703
NTC_new_880	6	0.23473	0.44175	0.999997	841	3	-0.10053	0.9557	0.95663	0.999834	1817	1	-0.10053\	0.0653703
EID2B	6	0.014228	0.053439	0.732989	141	2	-0.089058	0.95694	0.95772	0.999834	1818	1	-0.089058\	0.0634996
NTC_new_892	6	0.13664	0.31584	0.986369	614	4	-0.20602	0.95867	0.95913	0.999834	1819	1	-0.20602\	0.0608938
SPOP	6	0.13414	0.31132	0.986369	601	3	-0.14806	0.95936	0.9597	0.999834	1820	1	-0.14806\	0.0598558
EYA2	6	0.029267	0.099949	0.882013	208	5	-0.23926	0.95947	0.95978	0.999834	1821	1	-0.23926\	0.0596904
NFRKB	6	0.030268	0.1029	0.882013	221	5	-0.30844	0.95965	0.95993	0.999834	1822	1	-0.30844\	0.0594198
ATM	6	0.24807	0.45693	0.999997	870	3	-0.22326	0.95982	0.9601	0.999834	1823	1	-0.22326\	0.0591642
PCGF2	6	0.070881	0.19103	0.932503	395	4	-0.2472	0.95989	0.96016	0.999834	1824	1	-0.2472\	0.059059
ZMYND11	6	0.26087	0.47128	0.999997	899	3	-0.1911	0.96035	0.96066	0.999834	1825	1	-0.1911\	0.0583678
NTC_new_410	6	0.40757	0.62656	0.999997	1194	3	-0.085166	0.96112	0.96132	0.999834	1826	1	-0.085166\	0.0572115
NTC_new_662	6	0.064326	0.17755	0.898904	373	4	-0.20139	0.96112	0.96132	0.999834	1827	1	-0.20139\	0.0572115
NTC_new_670	6	0.65259	0.78457	0.999997	1485	2	-0.078534	0.96112	0.96132	0.999834	1828	1	-0.078534\	0.0572115
NTC_new_362	6	0.031246	0.10584	0.882013	226	5	-0.13135	0.96286	0.96292	0.999834	1829	1	-0.13135\	0.054602
NTC_new_624	6	0.21792	0.42278	0.999997	808	3	-0.14541	0.96286	0.96292	0.999834	1830	1	-0.14541\	0.054602
CHD6	6	0.14136	0.32411	0.986369	629	4	-0.30852	0.96331	0.96344	0.999834	1831	1	-0.30852\	0.053928
NTC_new_356	6	0.0048847	0.022021	0.732989	49	4	-0.64209	0.96393	0.96397	0.999834	1834	1	-0.64209\	0.0529997
NTC_new_613	6	0.30555	0.51996	0.999997	994	3	-0.17963	0.96393	0.96397	0.999834	1835	1	-0.17963\	0.0529997
NTC_new_783	6	0.36569	0.5835	0.999997	1107	3	-0.10145	0.96393	0.96397	0.999834	1833	1	-0.10145\	0.0529997
NTC_new_954	6	0.7392	0.84543	0.999997	1605	2	-0.069187	0.96393	0.96397	0.999834	1832	1	-0.069187\	0.0529997
HIST4H4	6	0.074682	0.19841	0.936887	408	4	-0.23439	0.96489	0.96493	0.999834	1836	1	-0.23439\	0.0515636
SETMAR	6	0.0023072	0.011619	0.696408	31	5	-0.75967	0.96498	0.96504	0.999834	1837	1	-0.75967\	0.0514291
TDRD10	6	0.34377	0.56124	0.999997	1067	3	-0.13486	0.96502	0.96509	0.999834	1838	1	-0.13486\	0.0513693
TADA1	6	0.0028378	0.014086	0.696408	38	3	-0.22681	0.96571	0.96569	0.999834	1839	0	-0.22681\	0.0503381
SMARCA2	6	0.1959	0.39762	0.999997	759	3	-0.10296	0.96589	0.96588	0.999834	1840	0	-0.10296\	0.0500692
MTF2	6	0.0038681	0.018361	0.732989	46	3	-0.050567	0.96605	0.96598	0.999834	1841	0	-0.050567\	0.0498302
PHF11	6	0.0072682	0.030279	0.732989	66	3	-0.44908	0.96738	0.96713	0.999834	1842	0	-0.44908\	0.0478454
PHF21B	6	0.31388	0.52887	0.999997	1014	3	-0.083697	0.96747	0.9672	0.999834	1843	0	-0.083697\	0.0477112
ZBTB16	6	0.042704	0.13352	0.882013	284	4	-0.36279	0.96756	0.96732	0.999834	1844	0	-0.36279\	0.047577
NTC_new_291	6	0.021164	0.07599	0.85445	172	4	-0.49395	0.96802	0.96779	0.999834	1846	0	-0.49395\	0.0468912
NTC_new_850	6	0.062032	0.1732	0.898904	362	4	-0.29909	0.96802	0.96779	0.999834	1847	0	-0.29909\	0.0468912
NTC_new_940	6	0.20651	0.40996	0.999997	788	3	-0.19947	0.96802	0.96779	0.999834	1845	0	-0.19947\	0.0468912
NTC_new_1059	6	0.0052644	0.023286	0.732989	53	4	-0.7526	0.96883	0.96855	0.999834	1848	0	-0.7526\	0.0456846
JMJD8	6	0.033732	0.11344	0.882013	246	4	-0.45211	0.96978	0.96953	0.999834	1849	0	-0.45211\	0.0442706
EYA4	6	0.027825	0.095746	0.882013	204	4	-0.42675	0.97008	0.9698	0.999834	1850	0	-0.42675\	0.0438244
HIST1H1T	6	0.030849	0.1045	0.882013	224	4	-0.37353	0.97022	0.96987	0.999834	1851	0	-0.37353\	0.0436162
NTC_new_870	6	0.014122	0.053101	0.732989	131	4	-0.22533	0.97088	0.97046	0.999834	1852	0	-0.22533\	0.0426351
H2AFV	6	0.3288	0.54483	0.999997	1041	3	-0.12484	0.97189	0.97152	0.999834	1853	0	-0.12484\	0.0411351
YEATS2	6	0.69561	0.8139	0.999997	1539	2	-0.072061	0.97195	0.97156	0.999834	1854	0	-0.072061\	0.041046
NTC_new_775	6	0.078123	0.20526	0.940953	415	3	-0.19737	0.97253	0.97217	0.999834	1855	0	-0.19737\	0.0401853
ING4	6	0.031835	0.10755	0.882013	233	4	-0.34174	0.97426	0.974	0.999834	1856	0	-0.34174\	0.0376213
NTC_new_955	6	0.1453	0.331	0.986369	641	3	-0.15122	0.9749	0.97457	0.999834	1857	0	-0.15122\	0.0366739
TAF6L	6	0.013293	0.05024	0.732989	94	4	-0.48282	0.97592	0.97553	0.999834	1858	0	-0.48282\	0.0351652
KMT2B	6	0.019568	0.070994	0.837207	164	3	-0.32844	0.97624	0.97588	0.999834	1859	0	-0.32844\	0.0346922
KMT2E	6	0.0063715	0.027207	0.732989	59	5	-0.60503	0.97631	0.97594	0.999834	1860	0	-0.60503\	0.0345888
PAF1	6	0.37814	0.59635	0.999997	1141	3	-0.22261	0.9769	0.9765	0.999834	1861	0	-0.22261\	0.0337172
NTC_new_149	6	0.013306	0.050296	0.732989	95	5	-0.38616	0.9774	0.97704	0.999834	1863	0	-0.38616\	0.032979
NTC_new_40	6	0.014122	0.053101	0.732989	120	3	-0.15443	0.9774	0.97704	0.999834	1864	0	-0.15443\	0.032979
NTC_new_693	6	0.043549	0.13519	0.882013	286	4	-0.26398	0.9774	0.97704	0.999834	1862	0	-0.26398\	0.032979
NTC_new_405	6	0.096616	0.24163	0.979689	475	3	-0.15703	0.97832	0.978	0.999834	1868	0	-0.15703\	0.0316217
NTC_new_512	6	0.0094584	0.037723	0.732989	80	5	-0.39505	0.97832	0.978	0.999834	1869	0	-0.39505\	0.0316217
NTC_new_759	6	0.0027739	0.013789	0.696408	36	5	-0.55675	0.97832	0.978	0.999834	1870	0	-0.55675\	0.0316217
NTC_new_793	6	0.068204	0.18554	0.924811	387	4	-0.25762	0.97832	0.978	0.999834	1867	0	-0.25762\	0.0316217
NTC_new_823	6	0.28004	0.49224	0.999997	950	3	-0.1533	0.97832	0.978	0.999834	1865	0	-0.1533\	0.0316217
NTC_new_828	6	0.020041	0.072519	0.840847	166	4	-0.41186	0.97832	0.978	0.999834	1866	0	-0.41186\	0.0316217
ARID2	6	0.0065971	0.028001	0.732989	60	5	-0.61164	0.97934	0.97922	0.999834	1871	0	-0.61164\	0.0301183
SP1	6	0.0012937	0.0066988	0.588538	20	5	-0.69628	0.97952	0.9794	0.999834	1872	0	-0.69628\	0.0298531
NTC_new_15	6	0.01766	0.064763	0.8029	156	4	-0.40107	0.9801	0.97996	0.999834	1874	0	-0.40107\	0.0289991
NTC_new_465	6	0.11717	0.28073	0.986369	541	4	-0.22827	0.9801	0.97996	0.999834	1873	0	-0.22827\	0.0289991
CBX4	6	0.45062	0.65914	0.999997	1256	1	-0.066279	0.98037	0.98022	0.999834	1875	0	-0.066279\	0.0286018
NTC_new_486	6	0.050269	0.14942	0.894038	322	4	-0.33348	0.98129	0.98099	0.999834	1876	0	-0.33348\	0.0272485
BRWD3	6	0.013999	0.052687	0.732989	107	4	-0.40019	0.98159	0.98133	0.999834	1877	0	-0.40019\	0.0268075
NTC_new_268	6	0.1091	0.26539	0.98132	513	3	-0.18296	0.98202	0.98176	0.999834	1878	0	-0.18296\	0.0261757
NTC_new_407	6	0.078353	0.20566	0.940953	419	4	-0.28111	0.9825	0.98225	0.999834	1880	0	-0.28111\	0.0254707
NTC_new_604	6	0.23473	0.44175	0.999997	842	2	-0.10245	0.9825	0.98225	0.999834	1879	0	-0.10245\	0.0254707
ZFP57	6	0.15842	0.35374	0.989288	685	4	-0.28175	0.98274	0.98249	0.999834	1881	0	-0.28175\	0.0251183
NTC_new_286	6	0.22892	0.43523	0.999997	830	3	-0.16485	0.98293	0.98272	0.999834	1882	0	-0.16485\	0.0248394
TAF5L	6	0.00025826	0.0016305	0.484441	6	5	-0.65465	0.98309	0.98287	0.999834	1883	0	-0.65465\	0.0246046
TADA3	6	0.14874	0.33721	0.987568	658	3	-0.12783	0.98318	0.98297	0.999834	1884	0	-0.12783\	0.0244725
NTC_new_10	6	0.037734	0.12261	0.882013	263	4	-0.27538	0.98353	0.98331	0.999834	1885	0	-0.27538\	0.023959
NTC_new_1088	6	0.28004	0.49224	0.999997	949	2	-0.049962	0.98402	0.98373	0.999834	1886	0	-0.049962\	0.0232405
INO80	6	0.029858	0.10164	0.882013	220	5	-0.16714	0.98436	0.98406	0.999834	1887	0	-0.16714\	0.0227421
POGZ	6	0.67316	0.7989	0.999997	1516	2	-0.097518	0.98462	0.98428	0.999834	1888	0	-0.097518\	0.0223611
NTC_new_978	6	0.016058	0.059659	0.766474	147	4	-0.46389	0.98488	0.98455	0.999834	1889	0	-0.46389\	0.0219801
TRIM28	6	0.029391	0.10024	0.882013	210	5	-0.19495	0.98507	0.98474	0.999834	1890	0	-0.19495\	0.0217018
H2AFJ	6	0.0028272	0.014061	0.696408	37	5	-0.47887	0.98574	0.98532	0.999834	1891	0	-0.47887\	0.0207209
SETD2	6	0.0071984	0.030049	0.732989	65	5	-0.41765	0.98579	0.98537	0.999834	1892	0	-0.41765\	0.0206477
HLCS	6	0.21467	0.41924	0.999997	803	3	-0.17296	0.98637	0.98595	0.999834	1893	0	-0.17296\	0.0197992
NTC_new_820	6	0.086302	0.22151	0.953696	448	3	-0.21877	0.9866	0.98617	0.999834	1894	0	-0.21877\	0.0194628
SRSF1	6	0.13188	0.30731	0.986369	592	4	-0.33646	0.98683	0.98641	0.999834	1895	0	-0.33646\	0.0191265
NTC_new_848	6	0.01453	0.05454	0.737624	142	5	-0.35651	0.98714	0.98676	0.999834	1896	0	-0.35651\	0.0186734
KAT6B	6	0.019914	0.07211	0.840847	165	5	-0.38854	0.98808	0.98771	0.999834	1897	0	-0.38854\	0.0173002
NTC_new_1008	6	0.00088216	0.0047124	0.588538	14	5	-0.55295	0.98831	0.98791	0.999834	1898	0	-0.55295\	0.0169645
HIST1H2AL	6	0.37673	0.59495	0.999997	1140	3	-0.15108	0.98855	0.98818	0.999834	1899	0	-0.15108\	0.0166142
NTC_new_460	6	0.59395	0.74558	0.999997	1401	1	-0.090283	0.9887	0.98832	0.999834	1901	0	-0.090283\	0.0163953
NTC_new_929	6	0.03363	0.11315	0.882013	244	5	-0.20528	0.9887	0.98832	0.999834	1900	0	-0.20528\	0.0163953
NTC_new_127	6	0.069925	0.18897	0.927564	390	4	-0.2231	0.98926	0.98885	0.999834	1903	0	-0.2231\	0.0155784
NTC_new_131	6	0.039062	0.12538	0.882013	268	4	-0.34842	0.98926	0.98885	0.999834	1902	0	-0.34842\	0.0155784
NTC_new_148	6	0.1244	0.29395	0.986369	565	4	-0.18731	0.99082	0.99029	0.999834	1904	0	-0.18731\	0.0133051
FOXA1	6	0.023618	0.083516	0.882013	181	4	-0.50733	0.99131	0.99079	0.999834	1905	0	-0.50733\	0.0125918
TADA2B	6	0.013877	0.052313	0.732989	103	5	-0.40785	0.99161	0.99104	0.999834	1906	0	-0.40785\	0.0121553
NTC_new_458	6	0.19208	0.39313	0.999997	756	3	-0.16389	0.99203	0.99145	0.999834	1908	0	-0.16389\	0.0115443
NTC_new_962	6	0.031246	0.10584	0.882013	227	5	-0.26097	0.99203	0.99145	0.999834	1907	0	-0.26097\	0.0115443
NTC_new_481	6	0.01613	0.059844	0.766474	151	5	-0.29756	0.99248	0.99199	0.999834	1909	0	-0.29756\	0.0108901
NTC_new_157	6	0.069925	0.18897	0.927564	392	4	-0.21514	0.9928	0.99233	0.999834	1911	0	-0.21514\	0.010425
NTC_new_379	6	0.068204	0.18554	0.924811	386	4	-0.21966	0.9928	0.99233	0.999834	1910	0	-0.21966\	0.010425
SAP130	6	0.003023	0.014962	0.696408	40	5	-0.66782	0.99313	0.99269	0.999834	1912	0	-0.66782\	0.00994552
PRR14	6	0.031496	0.10657	0.882013	231	4	-0.29966	0.99317	0.99272	0.999834	1913	0	-0.29966\	0.00988741
NTC_new_241	6	0.028548	0.097825	0.882013	207	5	-0.21631	0.99415	0.99372	0.999834	1914	0	-0.21631\	0.00846455
TBL1XR1	6	0.41725	0.63625	0.999997	1215	3	-0.16276	0.99428	0.99386	0.999834	1915	0	-0.16276\	0.00827591
NTC_new_757	6	0.03363	0.11315	0.882013	245	5	-0.18135	0.9944	0.99399	0.999834	1916	0	-0.18135\	0.0081018
NTC_new_60	6	0.027694	0.095388	0.882013	201	5	-0.22929	0.99538	0.99511	0.999834	1917	0	-0.22929\	0.0066807
NTC_new_53	6	0.016058	0.059659	0.766474	146	5	-0.35836	0.9962	0.99606	0.999834	1918	0	-0.35836\	0.00549268
NTC_new_390	6	0.0080121	0.032936	0.732989	71	5	-0.3688	0.99668	0.9965	0.999834	1919	0	-0.3688\	0.00479772
HIST1H3I	6	0.020498	0.073927	0.845748	169	5	-0.26405	0.99677	0.99662	0.999834	1920	0	-0.26405\	0.00466745
HIST1H2BL	6	0.0015494	0.0079121	0.588538	26	6	-0.5541	0.99691	0.99676	0.999834	1921	0	-0.5541\	0.00446483
JADE2	6	0.0027047	0.013477	0.696408	35	6	-0.2358	0.9973	0.99729	0.999834	1922	0	-0.2358\	0.00390054
NTC_new_1086	6	0.0025388	0.012724	0.696408	34	6	-0.27742	0.99746	0.99748	0.999834	1923	0	-0.27742\	0.00366911
NTC_new_596	6	0.0015317	0.0078046	0.588538	25	6	-0.5006	0.99847	0.99852	0.999834	1924	0	-0.5006\	0.00220901
CHD4	6	0.0014408	0.0073848	0.588538	22	6	-1.1113	0.99856	0.99858	0.999834	1925	0	-1.1113\	0.00207898
NPAS2	6	0.0013357	0.0068524	0.588538	21	6	-0.44294	0.99866	0.99869	0.999834	1926	0	-0.44294\	0.00193451
NTC_new_307	6	0.0012042	0.006279	0.588538	18	6	-0.35532	0.9988	0.99879	0.999834	1928	0	-0.35532\	0.00173227
NTC_new_501	6	0.0012042	0.006279	0.588538	17	6	-0.29347	0.9988	0.99879	0.999834	1927	0	-0.29347\	0.00173227
ANP32A	6	0.00047246	0.0027568	0.588538	9	6	-0.6011	0.99953	0.99949	0.999834	1929	0	-0.6011\	0.000678226
NTC_new_749	6	0.00035383	0.0021169	0.511757	8	6	-0.36884	0.99965	0.99959	0.999834	1931	0	-0.36884\	0.000505032
NTC_new_910	6	3.4208e-05	0.00024317	0.470297	1	6	-0.67111	0.99965	0.99959	0.999834	1930	0	-0.67111\	0.000505032
NTC_new_609	6	0.00028753	0.0017534	0.484441	7	6	-0.42598	0.99971	0.99966	0.999834	1932	0	-0.42598\	0.000418442
SIN3B	6	0.00019647	0.0012363	0.484441	4	6	-0.54376	0.9998	0.9998	0.999834	1933	0	-0.54376\	0.000288568
ATF7IP	6	0.0001775	0.0011288	0.484441	3	6	-0.88116	0.99982	0.99983	0.999834	1934	0	-0.88116\	0.000259708

## Sheet: HuEpi_Screen 1_10.6
id	num	neg|score	neg|p-value	neg|fdr	neg|rank	neg|goodsgrna	neg|lfc	pos|score	pos|p-value	pos|fdr	pos|rank	pos|goodsgrna	pos|lfc\	IBET151 + AZD5582 48hr 10.6 -log2 (y)
ING3	6	1	1	0.999997	1934	0	1.3565	4.5922e-14	2.5597e-06	0.000291	1	6	1.3565\	44.3078
INTS12	6	1	1	0.999997	1933	0	1.6332	1.1089e-13	2.5597e-06	0.000291	2	6	1.6332\	43.0359
ACTL6A	6	1	1	0.999997	1932	0	1.617	6.22e-12	2.5597e-06	0.000291	3	6	1.617\	37.2262
TRRAP	6	1	1	0.999997	1931	0	0.9651	1.1072e-10	2.5597e-06	0.000291	4	6	0.9651\	33.0724
RNF20	6	1	1	0.999997	1930	0	1.5102	6.931e-10	2.5597e-06	0.000291	5	6	1.5102\	30.4262
TAF5	6	0.98889	0.98888	0.999997	1857	0	1.523	1.0336e-09	2.5597e-06	0.000291	6	5	1.523\	29.8497
PPP2CA	6	1	1	0.999997	1929	0	1.0813	5.815e-09	2.5597e-06	0.000291	7	6	1.0813\	27.3576
TAF4	6	1	1	0.999997	1928	0	0.83138	2.6338e-08	2.5597e-06	0.000291	8	6	0.83138\	25.1783
WAC	6	1	1	0.999997	1927	0	0.87634	3.2922e-08	2.5597e-06	0.000291	9	6	0.87634\	24.8564
VPS72	6	0.99911	0.99914	0.999997	1900	0	0.95935	4.4175e-08	2.5597e-06	0.000291	10	6	0.95935\	24.4322
KAT8	6	0.99994	0.99997	0.999997	1912	0	0.78721	5.5576e-08	2.5597e-06	0.000291	11	6	0.78721\	24.101
SMARCA5	6	1	1	0.999997	1926	0	1.0835	1.7853e-07	2.5597e-06	0.000291	12	6	1.0835\	22.4173
DR1	6	1	1	0.999997	1925	0	0.93459	1.9249e-07	2.5597e-06	0.000291	13	6	0.93459\	22.3087
KDM3A	6	1	1	0.999997	1923	0	1.1351	3.2124e-07	2.5597e-06	0.000291	14	6	1.1351\	21.5698
SUZ12	6	1	1	0.999997	1924	0	0.81711	4.2617e-07	2.5597e-06	0.000291	15	6	0.81711\	21.1621
BRD2	6	0.42443	0.60309	0.999997	1098	1	1.1059	8.0981e-07	2.5597e-06	0.000291	16	5	1.1059\	20.2359
SAFB	6	1	1	0.999997	1922	0	0.77363	1.0356e-06	2.5597e-06	0.000291	17	6	0.77363\	19.8811
HEATR1	14	0.99992	0.99991	0.999997	1911	0	0.28561	1.5888e-06	1.2799e-05	0.001179	18	13	0.28561\	19.2636
UBE2D3	6	1	0.99999	0.999997	1921	0	0.83651	2.0661e-06	1.2799e-05	0.001179	19	6	0.83651\	18.8847
TAF6	6	0.99762	0.99762	0.999997	1889	0	1.0369	2.1774e-06	1.2799e-05	0.001179	20	5	1.0369\	18.809
TAF3	6	0.52063	0.67532	0.999997	1218	1	0.8782	2.3026e-06	1.2799e-05	0.001179	21	5	0.8782\	18.7283
YEATS4	6	0.98902	0.98902	0.999997	1859	0	0.81084	3.3597e-06	1.7918e-05	0.001333	22	5	0.81084\	18.1832
ARID1A	6	0.99998	0.99999	0.999997	1916	0	0.8487	3.7723e-06	1.7918e-05	0.001333	23	6	0.8487\	18.0161
EZH2	6	0.89022	0.89326	0.999997	1644	1	0.6491	4.1461e-06	1.7918e-05	0.001333	24	5	0.6491\	17.8798
BRD8	6	1	0.99999	0.999997	1920	0	0.7545	4.1877e-06	1.7918e-05	0.001333	25	6	0.7545\	17.8654
ASF1A	6	1	0.99999	0.999997	1919	0	0.61791	4.432e-06	1.7918e-05	0.001333	26	6	0.61791\	17.7836
UBE2H	6	0.99987	0.99991	0.999997	1908	0	0.95252	5.7162e-06	2.3037e-05	0.00165	27	6	0.95252\	17.4165
WDR82	6	0.99999	0.99999	0.999997	1918	0	1.0064	7.0836e-06	2.8157e-05	0.001945	28	6	1.0064\	17.1071
MPHOSPH8	6	0.98707	0.98712	0.999997	1852	0	0.80876	1.0087e-05	4.3515e-05	0.002902	29	5	0.80876\	16.5971
EXOSC2	6	0.99997	0.99997	0.999997	1915	0	0.97976	1.2355e-05	5.8874e-05	0.003673	30	6	0.97976\	16.3045
SENP1	6	0.94839	0.94912	0.999997	1752	0	0.79392	1.2531e-05	5.8874e-05	0.003673	31	4	0.79392\	16.2841
PHF12	6	0.99911	0.99916	0.999997	1901	0	0.71123	1.3388e-05	6.3993e-05	0.003868	32	6	0.71123\	16.1887
CUL5	6	0.99999	0.99999	0.999997	1917	0	0.49069	1.4932e-05	6.9112e-05	0.00405	33	6	0.49069\	16.0312
SETD1A	6	0.99966	0.99971	0.999997	1906	0	0.63479	2.3922e-05	0.00013055	0.007426	34	6	0.63479\	15.3513
DMAP1	6	0.84309	0.85984	0.999997	1579	1	0.45429	3.0161e-05	0.00018686	0.010325	35	3	0.45429\	15.017
EED	6	0.9986	0.99865	0.999997	1894	0	0.85831	3.4222e-05	0.00020222	0.010864	36	6	0.85831\	14.8347
ZNF217	6	0.99995	0.99997	0.999997	1913	0	0.74611	3.9014e-05	0.00022781	0.011805	37	6	0.74611\	14.6456
SRCAP	6	0.99996	0.99997	0.999997	1914	0	0.61122	3.9634e-05	0.00023293	0.011805	38	6	0.61122\	14.6229
KANSL1	6	0.97655	0.9766	0.999997	1824	0	0.75745	4.245e-05	0.00023805	0.011805	39	5	0.75745\	14.5239
EXOSC5	6	0.24009	0.43032	0.999997	803	2	0.5621	5.3077e-05	0.00027901	0.01349	40	4	0.5621\	14.2016
HCFC1	6	0.99987	0.99992	0.999997	1909	0	0.83991	5.9585e-05	0.00029437	0.013886	41	6	0.83991\	14.0347
MSL2	6	0.99936	0.99936	0.999997	1903	0	0.71356	7.1302e-05	0.0003558	0.016384	42	6	0.71356\	13.7757
KAT5	6	0.75106	0.81383	0.999997	1476	1	0.69613	8.7719e-05	0.00039676	0.017845	43	5	0.69613\	13.4768
CUL3	6	0.99989	0.99992	0.999997	1910	0	0.52713	0.00011296	0.0005401	0.02374	44	6	0.52713\	13.1119
USP16	6	0.99986	0.99991	0.999997	1907	0	0.43746	0.00013937	0.00067321	0.028933	45	6	0.43746\	12.8088
PRMT1	6	0.99901	0.99906	0.999997	1899	0	0.68493	0.00018351	0.00094454	0.039712	46	6	0.68493\	12.4119
ASH2L	6	0.99643	0.99648	0.999997	1883	0	0.49311	0.00035653	0.0018148	0.073329	47	5	0.49311\	11.4537
EXOSC9	6	0.99964	0.99969	0.999997	1905	0	0.53831	0.0003585	0.00182	0.073329	48	6	0.53831\	11.4457
RNF40	6	0.75764	0.81646	0.999997	1488	1	0.54665	0.00039116	0.0020094	0.077921	49	5	0.54665\	11.32
CBX7	6	0.60536	0.74085	0.999997	1346	2	0.51565	0.00039294	0.0020145	0.077921	50	4	0.51565\	11.3134
EXOSC7	6	0.99956	0.9996	0.999997	1904	0	0.73339	0.00043876	0.0022602	0.085712	51	6	0.73339\	11.1543
SET	6	0.99881	0.99883	0.999997	1897	0	0.64474	0.00047167	0.0024036	0.089395	52	6	0.64474\	11.0499
ARID4A	6	0.99725	0.99723	0.999997	1886	0	0.50349	0.0006945	0.0035247	0.128619	53	5	0.50349\	10.4917
KMT2D	6	0.99927	0.99931	0.999997	1902	0	0.38428	0.00072938	0.0037142	0.133022	54	6	0.38428\	10.421
PHF5A	6	0.94249	0.94336	0.999997	1744	0	0.82762	0.00076146	0.0039087	0.137444	55	4	0.82762\	10.3589
H2AFZ	6	0.61926	0.75183	0.999997	1361	1	0.82685	0.0008265	0.00418	0.14436	56	4	0.82685\	10.2407
PBK	6	0.99758	0.9976	0.999997	1888	0	0.44291	0.0010922	0.0054189	0.183766	57	5	0.44291\	9.83855
CHD1	6	0.13048	0.28756	0.980085	567	1	0.39223	0.0011094	0.0055111	0.183766	58	5	0.39223\	9.816
DDX21	6	0.83417	0.85475	0.999997	1569	1	0.70268	0.0011651	0.0057875	0.186881	59	5	0.70268\	9.74533
CTCF	6	0.99883	0.99886	0.999997	1898	0	0.38062	0.0011671	0.0057978	0.186881	60	6	0.38062\	9.74286
PHF3	6	0.9988	0.99881	0.999997	1896	0	0.37896	0.0012048	0.0059974	0.190148	61	6	0.37896\	9.69699
KANSL2	6	0.75203	0.81421	0.999997	1479	1	0.4268	0.0012858	0.0064326	0.200655	62	5	0.4268\	9.60312
MBD1	6	0.99867	0.99871	0.999997	1895	0	0.2658	0.001326	0.0066271	0.203442	63	6	0.2658\	9.5587
INO80C	6	0.96775	0.96801	0.999997	1804	0	0.32793	0.0014191	0.0070571	0.213258	64	5	0.32793\	9.46081
EXOSC1	6	0.99854	0.99859	0.999997	1893	0	0.14912	0.0014571	0.0072466	0.215613	65	6	0.14912\	9.42268
HIST1H1B	6	0.8384	0.85707	0.999997	1573	1	0.38175	0.0015017	0.0073745	0.216097	66	4	0.38175\	9.37919
PHF6	6	0.82312	0.84846	0.999997	1555	1	0.39792	0.001599	0.0077841	0.224693	67	5	0.39792\	9.28861
ACTR8	6	0.91283	0.9135	0.999997	1692	1	0.56117	0.0016386	0.007907	0.224884	68	5	0.56117\	9.25332
JAK2	6	0.95714	0.95737	0.999997	1777	0	0.39295	0.001725	0.0082704	0.231812	69	5	0.39295\	9.17919
TLK1	6	0.88376	0.88783	0.999997	1640	1	0.48363	0.0017741	0.0085213	0.235431	70	4	0.48363\	9.1387
BRD4	6	0.95585	0.95614	0.999997	1773	0	0.63368	0.0018223	0.0087619	0.23867	71	4	0.63368\	9.10002
CUL4B	6	0.033931	0.10456	0.846184	223	3	-0.18112	0.0023225	0.010733	0.288298	72	1	-0.18112\	8.75011
SP140	6	0.97183	0.97198	0.999997	1812	0	0.49381	0.0023997	0.011025	0.292079	73	4	0.49381\	8.70293
SAP30	6	0.91397	0.91456	0.999997	1700	0	0.25809	0.0024649	0.01127	0.294554	74	3	0.25809\	8.66426
CXXC1	6	0.91609	0.91666	0.999997	1704	0	0.33443	0.0026739	0.012064	0.311089	75	4	0.33443\	8.54684
AEBP2	6	0.99225	0.99231	0.999997	1870	0	0.44252	0.0028387	0.012673	0.322499	76	4	0.44252\	8.46055
MORF4L1	6	0.34944	0.54979	0.999997	1003	2	0.14858	0.0028974	0.012878	0.323454	77	3	0.14858\	8.43103
PRMT6	6	0.40156	0.58682	0.999997	1069	2	0.30188	0.0033788	0.014665	0.363608	78	4	0.30188\	8.20927
SP100	6	0.99809	0.99806	0.999997	1891	0	0.38854	0.0034413	0.014921	0.365271	79	5	0.38854\	8.18283
WDR5	6	0.90749	0.90853	0.999997	1672	1	0.32528	0.0036369	0.015642	0.378156	80	3	0.32528\	8.10308
MYSM1	6	0.56423	0.70859	0.999997	1282	2	0.35927	0.0038367	0.016349	0.390356	81	3	0.35927\	8.02592
G2E3	6	0.97698	0.97707	0.999997	1828	0	0.39837	0.0041038	0.017496	0.40706	82	5	0.39837\	7.92882
NTC_new_562	6	0.26563	0.46239	0.999997	855	1	0.37231	0.0041661	0.01768	0.40706	83	5	0.37231\	7.90709
NTC_new_79	6	0.87425	0.88098	0.999997	1628	1	0.36349	0.0041661	0.01768	0.40706	84	5	0.36349\	7.90709
ACTR5	6	0.9925	0.99249	0.999997	1873	0	0.36787	0.004336	0.018361	0.417764	85	4	0.36787\	7.84942
CBX5	6	0.74434	0.81108	0.999997	1469	1	0.38388	0.0046919	0.019651	0.441732	86	5	0.38388\	7.73561
GTF2I	6	0.97427	0.97426	0.999997	1818	0	0.37309	0.0047456	0.019871	0.441732	87	5	0.37309\	7.71919
EXOSC4	6	0.91417	0.91472	0.999997	1701	0	0.35022	0.0049587	0.020685	0.454476	88	4	0.35022\	7.65582
MCRS1	6	0.99062	0.99065	0.999997	1864	0	0.31537	0.0050936	0.021156	0.454476	89	4	0.31537\	7.6171
NTC_new_1091	6	0.019851	0.070154	0.798107	170	3	-0.034456	0.0051724	0.021514	0.454476	91	3	-0.034456\	7.59495
NTC_new_888	6	0.2896	0.49163	0.999997	910	2	0.3297	0.0051724	0.021514	0.454476	90	4	0.3297\	7.59495
TTK	6	0.99829	0.99828	0.999997	1892	0	0.39539	0.0052921	0.021939	0.454476	92	5	0.39539\	7.56194
FAM175B	6	0.99624	0.99633	0.999997	1881	0	0.26419	0.0053849	0.022318	0.454476	93	5	0.26419\	7.53686
BAZ1B	6	0.99671	0.9967	0.999997	1884	0	0.32951	0.0054532	0.0226	0.454476	94	5	0.32951\	7.51868
GATAD1	6	0.7455	0.81157	0.999997	1471	1	0.39767	0.0054701	0.02263	0.454476	95	4	0.39767\	7.51422
UBR7	6	0.97664	0.97671	0.999997	1825	0	0.423	0.0054726	0.02263	0.454476	96	4	0.423\	7.51356
RLIM	6	0.99244	0.99243	0.999997	1872	0	0.32644	0.0055048	0.022794	0.454476	97	5	0.32644\	7.50509
HIST1H2AC	6	0.79162	0.83196	0.999997	1523	1	0.44946	0.0060331	0.024781	0.486148	98	5	0.44946\	7.37288
NTC_new_21	6	0.99618	0.99627	0.999997	1880	0	0.34829	0.0061461	0.025175	0.486148	99	4	0.34829\	7.34611
PHIP	6	0.9604	0.96068	0.999997	1787	0	0.40379	0.0061923	0.025374	0.486148	100	5	0.40379\	7.33531
HAT1	6	0.95342	0.95385	0.999997	1764	0	0.30381	0.0062018	0.0254	0.486148	101	5	0.30381\	7.3331
SMARCC1	6	0.85853	0.86969	0.999997	1604	1	0.42113	0.0062875	0.025733	0.486148	102	5	0.42113\	7.3133
TCF20	6	0.99226	0.99231	0.999997	1871	0	0.28581	0.0063548	0.025948	0.486148	103	5	0.28581\	7.29794
SMEK1	6	0.98054	0.98062	0.999997	1835	0	0.5845	0.0064099	0.026142	0.486148	104	5	0.5845\	7.28548
CBX1	6	0.99389	0.99382	0.999997	1875	0	0.39103	0.0068108	0.027678	0.509807	105	5	0.39103\	7.19796
ARID4B	6	0.97713	0.97719	0.999997	1829	0	0.58218	0.0070325	0.028518	0.520316	106	4	0.58218\	7.15175
PRKAA1	6	0.91324	0.91383	0.999997	1694	1	0.32306	0.0071619	0.028979	0.520856	107	5	0.32306\	7.12544
SPOP	6	0.28303	0.48397	0.999997	897	2	0.32893	0.0072001	0.029086	0.520856	108	4	0.32893\	7.11777
NTC_new_310	6	0.98198	0.98187	0.999997	1839	0	0.21618	0.0077532	0.031021	0.550413	109	5	0.21618\	7.01099
BRWD3	6	0.82361	0.84873	0.999997	1556	1	0.22307	0.0079005	0.031543	0.55459	110	5	0.22307\	6.98384
KDM1A	6	0.91371	0.91426	0.999997	1699	0	0.22546	0.0079808	0.031835	0.554678	111	5	0.22546\	6.96925
CLNS1A	6	0.99551	0.99557	0.999997	1877	0	0.35436	0.0081316	0.032352	0.558655	112	5	0.35436\	6.94225
ARRB1	6	0.9907	0.99076	0.999997	1865	0	0.22119	0.0087065	0.03419	0.571658	113	5	0.22119\	6.84369
IKZF1	6	0.43639	0.61176	0.999997	1119	1	0.2583	0.0087805	0.034431	0.571658	114	5	0.2583\	6.83148
DPY30	6	0.97632	0.97639	0.999997	1823	0	0.42182	0.0088053	0.034492	0.571658	115	5	0.42182\	6.82741
ING1	6	0.92883	0.92941	0.999997	1725	0	0.26269	0.0090068	0.03525	0.571658	116	3	0.26269\	6.79477
NTC_new_107	6	0.35624	0.5542	0.999997	1014	1	0.32641	0.0090202	0.035301	0.571658	117	4	0.32641\	6.79262
NTC_new_117	6	0.9003	0.90219	0.999997	1661	1	0.28419	0.0090202	0.035301	0.571658	118	4	0.28419\	6.79262
NTC_new_395	6	0.61508	0.74857	0.999997	1356	1	0.29799	0.0090202	0.035301	0.571658	119	4	0.29799\	6.79262
PHF11	6	0.99563	0.99566	0.999997	1878	0	0.30672	0.0090703	0.03547	0.571658	120	5	0.30672\	6.78463
TLK2	6	0.39736	0.58363	0.999997	1065	2	0.37887	0.0098147	0.038045	0.608093	121	4	0.37887\	6.67084
NTC_new_91	6	0.10817	0.25783	0.960768	508	1	0.41414	0.010045	0.038828	0.61366	122	4	0.41414\	6.63738
NSL1	6	0.041871	0.123	0.908443	258	1	0.18826	0.010101	0.039028	0.61366	123	5	0.18826\	6.62936
UCHL5	6	0.97937	0.97941	0.999997	1833	0	0.30498	0.010606	0.040717	0.635061	124	5	0.30498\	6.55898
HELLS	6	0.36214	0.55857	0.999997	1023	2	0.28072	0.010829	0.041439	0.641149	125	3	0.28072\	6.52896
SUPT3H	6	0.9782	0.97816	0.999997	1831	0	0.28107	0.011028	0.042084	0.645961	126	5	0.28107\	6.50269
CENPA	6	0.99782	0.99782	0.999997	1890	0	0.25639	0.011191	0.042581	0.648437	127	5	0.25639\	6.48152
MLLT1	6	0.95277	0.95322	0.999997	1762	0	0.32816	0.011386	0.043093	0.651106	128	4	0.32816\	6.4566
SMARCB1	6	0.90756	0.90862	0.999997	1673	1	0.31419	0.011673	0.044107	0.661256	129	4	0.31419\	6.42068
NTC_new_834	6	0.96978	0.96999	0.999997	1808	0	0.32769	0.011961	0.045161	0.671264	130	4	0.32769\	6.38552
RBBP5	6	0.91276	0.91343	0.999997	1691	1	0.26055	0.012053	0.045468	0.671264	131	5	0.26055\	6.37446
NTC_new_357	6	0.22935	0.41679	0.999997	778	1	0.35694	0.012481	0.047106	0.690182	132	5	0.35694\	6.32412
DNMT1	6	0.38831	0.57708	0.999997	1054	2	0.21523	0.012807	0.048269	0.69983	133	3	0.21523\	6.28692
SETD3	6	0.96322	0.96349	0.999997	1793	0	0.36374	0.012877	0.048489	0.69983	134	4	0.36374\	6.27906
NTC_new_861	6	0.10007	0.24611	0.960768	494	3	0.01298	0.013012	0.048893	0.70044	135	3	0.01298\	6.26401
NTC_new_1065	6	0.99211	0.99216	0.999997	1869	0	0.30376	0.013159	0.049405	0.70257	136	5	0.30376\	6.24781
RPS6KA3	6	0.3762	0.5682	0.999997	1042	1	0.34475	0.013587	0.050885	0.718328	137	3	0.34475\	6.20163
ATF2	6	0.98978	0.98983	0.999997	1863	0	0.30117	0.0139	0.051862	0.720679	138	5	0.30117\	6.16877
MBD4	6	0.98252	0.98245	0.999997	1843	0	0.35423	0.014096	0.05263	0.720679	139	4	0.35423\	6.14857
NTC_new_129	6	0.38038	0.57124	0.999997	1048	1	0.27676	0.014108	0.052687	0.720679	140	3	0.27676\	6.14734
AICDA	6	0.68273	0.78825	0.999997	1429	1	0.31994	0.014259	0.053194	0.720679	141	4	0.31994\	6.13198
SP140L	6	0.93092	0.93171	0.999997	1730	0	0.30653	0.014306	0.053378	0.720679	142	4	0.30653\	6.12724
TAF12	6	0.97687	0.97693	0.999997	1827	0	0.39704	0.014353	0.053567	0.720679	143	4	0.39704\	6.1225
TAF10	6	0.96358	0.96386	0.999997	1794	0	0.37363	0.01459	0.054376	0.720679	144	5	0.37363\	6.09888
ZZZ3	6	0.97015	0.97044	0.999997	1809	0	0.32544	0.014638	0.054571	0.720679	145	4	0.32544\	6.09414
APOBEC1	6	0.9278	0.92837	0.999997	1721	0	0.20104	0.014857	0.055364	0.720679	146	5	0.20104\	6.07271
NTC_new_212	6	0.54887	0.69689	0.999997	1257	2	0.27064	0.014893	0.055523	0.720679	148	3	0.27064\	6.06922
NTC_new_527	6	0.78395	0.82822	0.999997	1513	1	0.10092	0.014893	0.055523	0.720679	149	3	0.10092\	6.06922
NTC_new_681	6	0.22917	0.41651	0.999997	770	3	-0.060137	0.014893	0.055523	0.720679	147	2	-0.060137\	6.06922
HIRIP3	6	0.95062	0.95142	0.999997	1758	0	0.24421	0.015148	0.056439	0.722934	150	3	0.24421\	6.04473
SMEK2	6	0.91154	0.91235	0.999997	1686	1	0.35887	0.015317	0.057028	0.722934	151	4	0.35887\	6.02872
EP400	6	0.97666	0.97673	0.999997	1826	0	0.23397	0.015332	0.057069	0.722934	152	3	0.23397\	6.02731
NTC_new_919	6	0.70897	0.79763	0.999997	1445	1	0.21184	0.015363	0.057192	0.722934	153	5	0.21184\	6.0244
EXOSC8	6	0.85055	0.86442	0.999997	1589	1	0.26249	0.015843	0.058871	0.732578	154	5	0.26249\	5.98001
BRMS1	6	0.96914	0.96941	0.999997	1806	0	0.38232	0.015866	0.058953	0.732578	155	4	0.38232\	5.97792
HIRA	6	0.94818	0.94887	0.999997	1751	0	0.33762	0.015917	0.059091	0.732578	156	4	0.33762\	5.97329
MGEA5	6	0.35104	0.55078	0.999997	1004	1	0.23124	0.016157	0.059818	0.736867	157	3	0.23124\	5.9517
SMARCD2	6	0.81378	0.84324	0.999997	1546	1	0.31905	0.016463	0.06077	0.740737	158	4	0.31905\	5.92463
NTC_new_29	6	0.31057	0.51745	0.999997	956	1	0.29514	0.016494	0.060898	0.740737	159	4	0.29514\	5.92191
NTC_new_31	6	0.17266	0.34419	0.999997	654	2	0.22298	0.017324	0.063596	0.768719	160	3	0.22298\	5.85108
NTC_new_356	6	0.87721	0.8831	0.999997	1632	1	0.3136	0.017487	0.064164	0.770771	161	4	0.3136\	5.83757
USP21	6	0.98224	0.98214	0.999997	1840	0	0.19972	0.018157	0.066007	0.788015	162	5	0.19972\	5.78333
HIST1H1C	6	0.5223	0.6766	0.999997	1226	1	0.20538	0.018374	0.066734	0.791806	163	5	0.20538\	5.76619
SIN3A	6	0.98871	0.98872	0.999997	1856	0	0.36517	0.018707	0.067769	0.799173	164	4	0.36517\	5.74028
USP15	6	0.11519	0.26769	0.970216	531	1	0.36772	0.019189	0.068859	0.807111	165	4	0.36772\	5.70358
LEO1	6	0.016963	0.062552	0.772557	155	2	0.32536	0.019636	0.069975	0.815251	166	4	0.32536\	5.67036
DZIP3	6	0.96597	0.96631	0.999997	1802	0	0.30692	0.019894	0.070594	0.817543	167	3	0.30692\	5.65152
NTC_new_318	6	0.1136	0.26549	0.970216	525	3	-0.019734	0.021154	0.073697	0.840914	168	3	-0.019734\	5.56293
NTC_new_686	6	0.32373	0.53238	0.999997	979	1	0.13922	0.021154	0.073697	0.840914	169	4	0.13922\	5.56293
HIST1H2BH	6	0.91023	0.91118	0.999997	1681	1	0.30948	0.021278	0.073917	0.840914	170	4	0.30948\	5.55449
RPA3	6	0.92716	0.92776	0.999997	1719	0	0.39613	0.021745	0.075033	0.848619	171	4	0.39613\	5.52317
NTC_new_138	6	0.73975	0.80917	0.999997	1463	1	0.34854	0.022146	0.076103	0.851285	172	4	0.34854\	5.49681
NTC_new_684	6	0.96422	0.96461	0.999997	1796	0	0.27973	0.022172	0.076149	0.851285	173	4	0.27973\	5.49512
USP49	6	0.91576	0.9163	0.999997	1702	0	0.40298	0.022913	0.077946	0.866365	174	4	0.40298\	5.44769
HIST1H2BM	6	0.42541	0.60369	0.999997	1100	1	0.2126	0.023101	0.078448	0.866959	175	3	0.2126\	5.4359
GFI1B	6	0.38452	0.57433	0.999997	1049	2	0.12877	0.023607	0.0796	0.872864	176	3	0.12877\	5.40464
NIPBL	6	0.75316	0.81467	0.999997	1481	1	0.38443	0.023985	0.080588	0.872864	177	4	0.38443\	5.38172
USP11	6	0.36142	0.55796	0.999997	1021	1	0.24214	0.024052	0.080731	0.872864	178	4	0.24214\	5.3777
NTC_new_798	6	0.080105	0.20564	0.938947	416	1	0.27532	0.02408	0.080787	0.872864	179	4	0.27532\	5.37602
CHD2	6	0.85843	0.86963	0.999997	1603	1	0.2187	0.024528	0.082001	0.881051	180	3	0.2187\	5.34943
SUV39H1	6	0.84463	0.86076	0.999997	1581	1	0.33273	0.025492	0.08435	0.901291	181	4	0.33273\	5.29381
RB1	6	0.63981	0.76837	0.999997	1390	1	0.3663	0.026591	0.087258	0.927239	182	4	0.3663\	5.23292
NTC_new_304	6	0.60011	0.73668	0.999997	1335	2	0.1259	0.027475	0.089275	0.943489	183	3	0.1259\	5.18574
HIST1H2BC	6	0.46933	0.6363	0.999997	1164	2	0.20413	0.028463	0.091584	0.957533	184	3	0.20413\	5.13477
MRGBP	6	0.98647	0.98642	0.999997	1850	0	0.28085	0.028469	0.091594	0.957533	185	4	0.28085\	5.13446
TONSL	6	0.94804	0.94874	0.999997	1749	0	0.49416	0.029123	0.093304	0.965766	186	4	0.49416\	5.1017
EHMT1	6	0.5551	0.70164	0.999997	1265	1	0.32578	0.029286	0.093658	0.965766	187	4	0.32578\	5.09365
HDAC8	6	0.53106	0.68312	0.999997	1234	2	0.23237	0.029558	0.094364	0.965766	188	3	0.23237\	5.08031
MOV10	6	0.75493	0.81536	0.999997	1484	1	0.16043	0.029562	0.094379	0.965766	189	3	0.16043\	5.08011
HUWE1	6	0.64579	0.77349	0.999997	1405	2	0.016512	0.029865	0.095183	0.968864	190	2	0.016512\	5.0654
MLLT10	6	0.85485	0.86726	0.999997	1598	1	0.26549	0.030161	0.09589	0.970945	191	4	0.26549\	5.05117
BAZ2B	6	0.42378	0.60261	0.999997	1094	1	0.33365	0.030633	0.097077	0.977852	192	4	0.33365\	5.02877
NTC_new_476	6	0.22935	0.41679	0.999997	776	2	0.27364	0.03119	0.098475	0.981704	194	4	0.27364\	5.00277
NTC_new_517	6	0.95529	0.95557	0.999997	1772	0	0.26047	0.03119	0.098475	0.981704	193	4	0.26047\	5.00277
HIST1H3B	6	0.34923	0.5496	0.999997	1002	2	0.25719	0.031502	0.099207	0.98393	195	4	0.25719\	4.98841
PPM1G	6	0.31605	0.52405	0.999997	964	1	0.19502	0.031958	0.10029	0.989569	196	4	0.19502\	4.96768
NTC_new_1000	6	0.90624	0.90746	0.999997	1670	1	-0.0062982	0.033546	0.10401	0.999946	198	2	-0.0062982\	4.89772
NTC_new_590	6	0.49808	0.6581	0.999997	1192	1	0.065667	0.033546	0.10401	0.999946	197	2	0.065667\	4.89772
NTC_new_738	6	0.18574	0.3611	0.999997	681	1	0.13656	0.033546	0.10401	0.999946	199	4	0.13656\	4.89772
TAF7	6	0.96468	0.9651	0.999997	1798	0	0.097579	0.033867	0.10464	0.999946	200	2	0.097579\	4.88398
PPP4C	6	0.98721	0.98726	0.999997	1854	0	0.4464	0.033996	0.10499	0.999946	201	4	0.4464\	4.87849
TAF1	6	0.75621	0.81593	0.999997	1486	1	0.1177	0.034871	0.10703	0.999946	202	3	0.1177\	4.84183
IKBKAP	6	0.41162	0.59382	0.999997	1081	2	0.11305	0.034944	0.10718	0.999946	203	3	0.11305\	4.83881
KDM2A	6	0.96368	0.964	0.999997	1795	0	0.21047	0.035004	0.10734	0.999946	204	3	0.21047\	4.83634
PHF20	6	0.52203	0.67644	0.999997	1225	1	0.18807	0.035064	0.1075	0.999946	205	3	0.18807\	4.83387
RAD54B	6	0.17217	0.34353	0.999997	648	3	-0.13646	0.035426	0.10839	0.999946	206	2	-0.13646\	4.81905
USP7	6	0.37777	0.56927	0.999997	1043	2	0.27946	0.035591	0.10878	0.999946	207	4	0.27946\	4.81234
UTY	6	0.98892	0.98892	0.999997	1858	0	0.20741	0.035679	0.10902	0.999946	208	4	0.20741\	4.80878
ACAT1	6	0.75859	0.81689	0.999997	1490	1	0.2068	0.036035	0.10981	0.999946	209	3	0.2068\	4.79446
NTC_new_131	6	0.52195	0.6764	0.999997	1221	2	0.23714	0.036563	0.11107	0.999946	211	4	0.23714\	4.77347
NTC_new_880	6	0.032963	0.10246	0.846184	219	2	0.25805	0.036563	0.11107	0.999946	210	4	0.25805\	4.77347
CDK2	6	0.78979	0.83103	0.999997	1521	1	0.060561	0.036741	0.11147	0.999946	212	2	0.060561\	4.76647
HLTF	6	0.53086	0.68299	0.999997	1233	2	0.21903	0.037073	0.11234	0.999946	213	4	0.21903\	4.75349
HIST1H1E	6	0.9133	0.91389	0.999997	1695	1	0.24542	0.037281	0.11276	0.999946	214	4	0.24542\	4.74542
HIST1H4J	6	0.12979	0.28656	0.979157	566	2	0.2665	0.03753	0.11331	0.999946	216	4	0.2665\	4.73581
HIST1H4K	6	0.12979	0.28656	0.979157	565	2	0.2665	0.03753	0.11331	0.999946	215	4	0.2665\	4.73581
APOBEC3C	6	0.92814	0.9287	0.999997	1723	0	0.12537	0.038338	0.11503	0.999946	217	3	0.12537\	4.70508
SMARCA4	6	0.64442	0.77228	0.999997	1401	1	0.46026	0.038412	0.11521	0.999946	218	4	0.46026\	4.7023
HMGB1	6	0.2716	0.46973	0.999997	878	1	0.14453	0.038783	0.11608	0.999946	219	3	0.14453\	4.68843
SMARCAD1	6	0.99535	0.99538	0.999997	1876	0	0.20023	0.038976	0.11649	0.999946	220	3	0.20023\	4.68127
ENY2	6	0.91337	0.91395	0.999997	1696	1	0.34358	0.039396	0.11736	0.999946	221	4	0.34358\	4.66581
CHD8	6	0.97108	0.97136	0.999997	1811	0	0.20264	0.039584	0.11778	0.999946	222	4	0.20264\	4.65894
NTC_new_569	6	0.83975	0.85795	0.999997	1574	1	0.25394	0.040507	0.12007	0.999946	223	4	0.25394\	4.62568
NTC_new_908	6	0.20214	0.38205	0.999997	716	2	0.24093	0.040507	0.12007	0.999946	224	4	0.24093\	4.62568
H2AFV	6	0.7888	0.83052	0.999997	1518	1	0.21208	0.041373	0.12204	0.999946	225	4	0.21208\	4.59517
NTC_new_156	6	0.61416	0.74787	0.999997	1354	2	0.15358	0.042014	0.12354	0.999946	226	3	0.15358\	4.57299
NTC_new_974	6	0.41043	0.59302	0.999997	1076	1	0.23073	0.042014	0.12354	0.999946	227	3	0.23073\	4.57299
ZCWPW2	6	0.61228	0.74638	0.999997	1352	1	0.23633	0.042078	0.12368	0.999946	228	4	0.23633\	4.57079
EZH1	6	0.22259	0.40811	0.999997	760	3	-0.086173	0.04208	0.12368	0.999946	229	2	-0.086173\	4.57072
BPTF	6	0.63959	0.76823	0.999997	1389	1	0.35021	0.042274	0.12409	0.999946	230	4	0.35021\	4.56409
EPC2	6	0.99253	0.99252	0.999997	1874	0	0.23703	0.042618	0.1248	0.999946	231	4	0.23703\	4.55239
NFRKB	6	0.9676	0.96786	0.999997	1803	0	0.21208	0.042766	0.12514	0.999946	232	4	0.21208\	4.54739
NCOA6	6	0.83806	0.85692	0.999997	1572	1	0.16485	0.042868	0.12534	0.999946	233	4	0.16485\	4.54396
NTC_new_996	6	0.46737	0.63478	0.999997	1161	2	0.23775	0.043487	0.12671	0.999946	234	4	0.23775\	4.52327
PRM2	6	0.42811	0.60553	0.999997	1102	2	0.039605	0.043609	0.12704	0.999946	235	3	0.039605\	4.51923
HDGFRP3	6	0.57372	0.71606	0.999997	1295	2	0.23126	0.044084	0.12812	0.999946	236	3	0.23126\	4.5036
NBN	6	0.19643	0.37475	0.999997	703	3	0.079516	0.044352	0.12885	0.999946	237	3	0.079516\	4.49486
ZNHIT1	6	0.76438	0.8192	0.999997	1495	1	0.09915	0.044361	0.12887	0.999946	238	3	0.09915\	4.49456
NTC_new_120	6	0.6292	0.75956	0.999997	1377	1	0.23796	0.044546	0.12927	0.999946	240	4	0.23796\	4.48856
NTC_new_822	6	0.90876	0.90979	0.999997	1674	1	0.20671	0.044546	0.12927	0.999946	239	4	0.20671\	4.48856
BRDT	6	0.89576	0.89784	0.999997	1654	1	0.2539	0.045081	0.13052	0.999946	241	4	0.2539\	4.47134
ZNF541	6	0.2079	0.38961	0.999997	728	1	0.26892	0.045286	0.13087	0.999946	242	4	0.26892\	4.46479
HDAC11	6	0.19325	0.37086	0.999997	695	3	-0.093548	0.045853	0.13243	0.999946	243	1	-0.093548\	4.44684
NTC_new_755	6	0.22917	0.41651	0.999997	771	2	0.18825	0.045881	0.13247	0.999946	245	3	0.18825\	4.44596
NTC_new_943	6	0.49071	0.65219	0.999997	1189	2	0.22566	0.045881	0.13247	0.999946	244	4	0.22566\	4.44596
PKM	6	0.22178	0.40716	0.999997	759	2	-0.28858	0.046349	0.13348	0.999946	246	1	-0.28858\	4.43132
GTF3C4	6	0.64157	0.76997	0.999997	1398	1	0.12764	0.046734	0.13443	0.999946	247	3	0.12764\	4.41938
HIST2H2BE	6	0.53359	0.68505	0.999997	1238	2	0.27194	0.046949	0.13504	0.999946	248	4	0.27194\	4.41276
STK4	6	0.081529	0.20866	0.938947	428	2	0.32005	0.04716	0.13548	0.999946	249	4	0.32005\	4.40629
HDGFL1	6	0.10923	0.25926	0.964233	520	2	0.18659	0.047582	0.13628	0.999946	250	3	0.18659\	4.39344
HIST1H3G	6	0.42831	0.60569	0.999997	1103	2	0.13861	0.047653	0.13645	0.999946	251	3	0.13861\	4.39129
SATB2	6	0.96937	0.96964	0.999997	1807	0	0.25955	0.047849	0.13695	0.999946	252	4	0.25955\	4.38537
NTC_new_1052	6	0.92965	0.93034	0.999997	1726	0	0.2183	0.048807	0.13909	0.999946	253	4	0.2183\	4.35677
NTC_new_145	6	0.83975	0.85795	0.999997	1575	1	0.16188	0.049321	0.14021	0.999946	256	3	0.16188\	4.34165
NTC_new_148	6	0.89778	0.89972	0.999997	1658	1	0.10694	0.049321	0.14021	0.999946	257	3	0.10694\	4.34165
NTC_new_199	6	0.00049157	0.0025008	0.354703	12	3	-0.10132	0.049321	0.14021	0.999946	254	2	-0.10132\	4.34165
NTC_new_272	6	0.13827	0.29818	0.985775	577	2	0.091437	0.049321	0.14021	0.999946	255	2	0.091437\	4.34165
FXR1	6	0.8467	0.86209	0.999997	1586	1	0.30358	0.049955	0.14168	0.999946	258	4	0.30358\	4.32323
HMGB3	6	0.95007	0.95089	0.999997	1756	0	0.3269	0.050394	0.14268	0.999946	259	4	0.3269\	4.3106
ZMYND11	6	0.086172	0.21806	0.938947	440	3	-0.011755	0.05042	0.14272	0.999946	260	3	-0.011755\	4.30986
NTC_new_670	6	0.74862	0.81286	0.999997	1474	1	0.17058	0.051169	0.14459	0.999946	261	4	0.17058\	4.28859
MUM1	6	0.99703	0.99702	0.999997	1885	0	0.23816	0.051685	0.1457	0.999946	262	4	0.23816\	4.27411
DAXX	6	0.81005	0.84132	0.999997	1541	1	0.31358	0.05176	0.14589	0.999946	263	4	0.31358\	4.27202
ZRANB3	6	0.87877	0.88421	0.999997	1634	1	0.022067	0.052293	0.14702	0.999946	264	2	0.022067\	4.25724
SMYD2	6	0.87185	0.87927	0.999997	1624	1	0.14064	0.052346	0.14713	0.999946	265	3	0.14064\	4.25578
TDRKH	6	0.91202	0.91273	0.999997	1689	1	0.11776	0.052601	0.14772	0.999946	266	2	0.11776\	4.24877
USP17L2	6	0.98936	0.98937	0.999997	1860	0	0.16655	0.052968	0.14853	0.999946	267	3	0.16655\	4.23874
ING2	6	0.1612	0.32935	0.999997	625	3	0.15996	0.05312	0.14896	0.999946	268	3	0.15996\	4.2346
PRDM8	6	0.91071	0.91158	0.999997	1682	1	0.25204	0.055275	0.15328	0.999946	269	4	0.25204\	4.17723
ASH1L	6	0.3689	0.56327	0.999997	1033	2	0.19871	0.055688	0.15415	0.999946	270	4	0.19871\	4.16649
SETD2	6	0.8412	0.85877	0.999997	1576	1	0.17687	0.055923	0.15463	0.999946	271	4	0.17687\	4.16041
NTC_new_106	6	0.77404	0.82356	0.999997	1504	1	0.16731	0.056843	0.15656	0.999946	274	3	0.16731\	4.13687
NTC_new_114	6	0.13625	0.29555	0.985775	573	2	0.1863	0.056843	0.15656	0.999946	273	3	0.1863\	4.13687
NTC_new_382	6	0.088057	0.22196	0.938947	447	3	0.014055	0.056843	0.15656	0.999946	272	3	0.014055\	4.13687
POGZ	6	0.95707	0.95729	0.999997	1776	0	0.2274	0.057229	0.15743	0.999946	275	4	0.2274\	4.12711
APOBEC2	6	0.52119	0.67575	0.999997	1220	1	0.19512	0.057409	0.15777	0.999946	276	4	0.19512\	4.12258
NTC_new_862	6	0.98354	0.98354	0.999997	1847	0	0.22808	0.058373	0.15969	0.999946	277	4	0.22808\	4.09855
PAXIP1	6	0.30057	0.50484	0.999997	938	3	-0.085158	0.059008	0.16105	0.999946	278	2	-0.085158\	4.08295
BRPF1	6	0.9894	0.98942	0.999997	1861	0	0.20799	0.059164	0.16138	0.999946	279	4	0.20799\	4.07914
MBIP	6	0.95763	0.95793	0.999997	1780	0	0.16379	0.059226	0.16151	0.999946	280	4	0.16379\	4.07763
SMARCC2	6	0.93937	0.94018	0.999997	1740	0	0.22196	0.059593	0.16232	0.999946	281	4	0.22196\	4.06871
NTC_new_191	6	0.23528	0.4243	0.999997	794	2	0.23646	0.060582	0.16454	0.999946	283	4	0.23646\	4.04497
NTC_new_698	6	0.98518	0.98515	0.999997	1849	0	0.23048	0.060582	0.16454	0.999946	282	4	0.23048\	4.04497
NTC_new_864	6	0.88255	0.88696	0.999997	1639	1	0.13813	0.060582	0.16454	0.999946	284	3	0.13813\	4.04497
EPC1	6	0.9239	0.92458	0.999997	1715	0	0.26349	0.060767	0.16501	0.999946	285	4	0.26349\	4.04057
TTF2	6	0.97103	0.97128	0.999997	1810	0	0.34985	0.06083	0.16511	0.999946	286	4	0.34985\	4.03907
NTC_new_1067	6	0.88255	0.88696	0.999997	1638	1	0.13181	0.061909	0.16744	0.999946	287	3	0.13181\	4.01371
NTC_new_383	6	0.98301	0.98298	0.999997	1846	0	0.19154	0.061909	0.16744	0.999946	288	3	0.19154\	4.01371
NTC_new_61	6	0.91743	0.91797	0.999997	1706	0	0.15538	0.062019	0.16771	0.999946	289	4	0.15538\	4.01115
NTC_new_214	6	0.81192	0.84229	0.999997	1542	1	0.20864	0.063524	0.17101	0.999946	290	3	0.20864\	3.97655
NTC_new_215	6	0.87425	0.88098	0.999997	1626	1	0.20575	0.063524	0.17101	0.999946	291	3	0.20575\	3.97655
NTC_new_780	6	0.58025	0.72096	0.999997	1309	2	0.17496	0.064249	0.17251	0.999946	292	4	0.17496\	3.96018
NTC_new_875	6	0.56279	0.70761	0.999997	1276	2	0.17243	0.064249	0.17251	0.999946	293	4	0.17243\	3.96018
NTC_new_1068	6	0.56279	0.70761	0.999997	1275	2	0.087209	0.064576	0.17317	0.999946	304	3	0.087209\	3.95286
NTC_new_141	6	0.080105	0.20564	0.938947	420	3	-0.047048	0.064576	0.17317	0.999946	305	2	-0.047048\	3.95286
NTC_new_188	6	0.04903	0.13943	0.926106	286	4	-0.19573	0.064576	0.17317	0.999946	303	1	-0.19573\	3.95286
NTC_new_261	6	0.12194	0.27642	0.970216	542	2	0.016501	0.064576	0.17317	0.999946	301	2	0.016501\	3.95286
NTC_new_270	6	0.60011	0.73668	0.999997	1332	2	0.04238	0.064576	0.17317	0.999946	313	2	0.04238\	3.95286
NTC_new_283	6	0.053312	0.14917	0.926106	297	4	-0.20578	0.064576	0.17317	0.999946	294	1	-0.20578\	3.95286
NTC_new_323	6	0.27733	0.47709	0.999997	888	3	-0.090537	0.064576	0.17317	0.999946	298	1	-0.090537\	3.95286
NTC_new_326	6	0.88255	0.88696	0.999997	1637	1	0.16003	0.064576	0.17317	0.999946	296	3	0.16003\	3.95286
NTC_new_347	6	0.55528	0.7018	0.999997	1267	2	0.042509	0.064576	0.17317	0.999946	297	2	0.042509\	3.95286
NTC_new_425	6	0.017258	0.063407	0.772557	157	4	-0.32365	0.064576	0.17317	0.999946	299	2	-0.32365\	3.95286
NTC_new_614	6	0.16374	0.33263	0.999997	637	2	0.067251	0.064576	0.17317	0.999946	295	3	0.067251\	3.95286
NTC_new_615	6	0.95152	0.95213	0.999997	1760	0	0.13302	0.064576	0.17317	0.999946	311	3	0.13302\	3.95286
NTC_new_657	6	0.15023	0.3144	0.999997	601	3	-0.12735	0.064576	0.17317	0.999946	308	1	-0.12735\	3.95286
NTC_new_771	6	0.092801	0.2316	0.938947	465	2	-0.0085357	0.064576	0.17317	0.999946	312	2	-0.0085357\	3.95286
NTC_new_811	6	0.080105	0.20564	0.938947	413	2	-0.099096	0.064576	0.17317	0.999946	307	2	-0.099096\	3.95286
NTC_new_838	6	0.056567	0.15581	0.926106	319	3	-0.21519	0.064576	0.17317	0.999946	300	1	-0.21519\	3.95286
NTC_new_839	6	0.15187	0.31661	0.999997	610	2	0.062391	0.064576	0.17317	0.999946	306	2	0.062391\	3.95286
NTC_new_89	6	0.25573	0.45008	0.999997	833	2	0.12711	0.064576	0.17317	0.999946	302	3	0.12711\	3.95286
NTC_new_909	6	0.10817	0.25783	0.960768	517	2	0.10946	0.064576	0.17317	0.999946	309	3	0.10946\	3.95286
NTC_new_937	6	0.15023	0.3144	0.999997	600	3	0.014538	0.064576	0.17317	0.999946	310	3	0.014538\	3.95286
TNP2	6	0.68352	0.78852	0.999997	1430	1	0.088539	0.065002	0.17405	0.999946	314	3	0.088539\	3.94337
PIWIL4	6	0.83428	0.85479	0.999997	1570	1	0.2454	0.065641	0.17538	0.999946	315	4	0.2454\	3.92926
EYA4	6	0.47163	0.63799	0.999997	1166	1	0.1956	0.066267	0.17667	0.999946	316	4	0.1956\	3.91557
TDRD9	6	0.36532	0.56069	0.999997	1030	1	0.097417	0.066327	0.17678	0.999946	317	3	0.097417\	3.91426
NTC_new_78	6	0.82759	0.851	0.999997	1561	1	0.18279	0.067357	0.17915	0.999946	318	4	0.18279\	3.89203
NTC_new_406	6	0.15122	0.3157	0.999997	604	3	0.037439	0.068843	0.18235	0.999946	320	3	0.037439\	3.86055
NTC_new_519	6	0.39262	0.58033	0.999997	1058	2	0.10457	0.068843	0.18235	0.999946	319	3	0.10457\	3.86055
NTC_new_782	6	0.010032	0.038772	0.71227	96	2	0.11932	0.068843	0.18235	0.999946	321	3	0.11932\	3.86055
INO80D	6	0.84265	0.85955	0.999997	1578	1	0.097242	0.070785	0.18651	0.999946	322	3	0.097242\	3.82041
NTC_new_1021	6	0.96552	0.96587	0.999997	1801	0	0.14977	0.071813	0.18858	0.999946	327	3	0.14977\	3.79961
NTC_new_146	6	0.51238	0.66924	0.999997	1207	2	0.094767	0.071813	0.18858	0.999946	325	3	0.094767\	3.79961
NTC_new_773	6	0.25437	0.44852	0.999997	829	1	0.11689	0.071813	0.18858	0.999946	323	3	0.11689\	3.79961
NTC_new_892	6	0.95635	0.95658	0.999997	1774	0	0.16646	0.071813	0.18858	0.999946	326	3	0.16646\	3.79961
NTC_new_985	6	0.54338	0.69259	0.999997	1247	2	0.15242	0.071813	0.18858	0.999946	324	3	0.15242\	3.79961
NFYB	6	0.91222	0.91293	0.999997	1690	1	0.15324	0.071866	0.18868	0.999946	328	4	0.15324\	3.79855
RAD51	6	0.21786	0.40194	0.999997	750	3	-0.32704	0.071882	0.1887	0.999946	329	2	-0.32704\	3.79823
CHTOP	6	0.56578	0.70974	0.999997	1284	1	0.18411	0.071935	0.18883	0.999946	331	4	0.18411\	3.79716
CSNK2A1	6	0.75187	0.81416	0.999997	1478	1	0.11764	0.071935	0.18883	0.999946	330	3	0.11764\	3.79716
SAP25	6	0.37122	0.56494	0.999997	1035	2	0.040969	0.072224	0.18957	0.999946	332	3	0.040969\	3.79138
PRDM7	6	0.95759	0.9579	0.999997	1779	0	0.24003	0.072513	0.19022	0.999946	333	3	0.24003\	3.78562
KDM4A	6	0.84594	0.86166	0.999997	1584	1	0.11518	0.072657	0.19053	0.999946	334	3	0.11518\	3.78275
NTC_new_860	6	0.34252	0.54494	0.999997	996	1	0.16036	0.073574	0.19233	0.999946	335	4	0.16036\	3.76466
NTC_new_298	6	0.27733	0.47709	0.999997	885	2	0.18991	0.074621	0.19439	0.999946	337	3	0.18991\	3.74427
NTC_new_301	6	0.49808	0.6581	0.999997	1195	1	0.28249	0.074621	0.19439	0.999946	338	3	0.28249\	3.74427
NTC_new_536	6	0.73131	0.8058	0.999997	1458	1	0.22377	0.074621	0.19439	0.999946	336	4	0.22377\	3.74427
ASXL3	6	0.99753	0.99752	0.999997	1887	0	0.17429	0.074739	0.19463	0.999946	339	4	0.17429\	3.74199
CENPC	6	0.64616	0.77383	0.999997	1406	1	0.22194	0.074881	0.19496	0.999946	340	4	0.22194\	3.73926
NTC_new_1008	6	0.56893	0.7122	0.999997	1289	2	-0.011061	0.07572	0.19672	0.999946	341	2	-0.011061\	3.72318
NTC_new_802	6	0.34225	0.54476	0.999997	993	2	0.036198	0.07572	0.19672	0.999946	342	3	0.036198\	3.72318
NTC_new_599	6	0.93788	0.93875	0.999997	1738	0	0.21902	0.077719	0.20082	0.999946	344	3	0.21902\	3.68559
NTC_new_64	6	0.51238	0.66924	0.999997	1210	2	0.1278	0.077719	0.20082	0.999946	343	3	0.1278\	3.68559
EXOSC3	6	0.85914	0.87017	0.999997	1605	1	0.23847	0.079514	0.20459	0.999946	345	4	0.23847\	3.65265
NTC_new_803	6	0.034118	0.10501	0.846184	235	2	0.053801	0.080174	0.2059	0.999946	346	2	0.053801\	3.64072
CHAF1A	6	0.11004	0.26049	0.966981	521	3	0.030231	0.080264	0.20605	0.999946	347	3	0.030231\	3.6391
ACTB	6	0.367	0.56184	0.999997	1032	2	0.19067	0.08074	0.20707	0.999946	348	3	0.19067\	3.63057
UBR2	6	0.88445	0.8884	0.999997	1642	1	0.037848	0.081549	0.20873	0.999946	349	2	0.037848\	3.61619
HSPBAP1	6	0.78923	0.83077	0.999997	1520	1	0.1634	0.083331	0.21224	0.999946	350	4	0.1634\	3.585
CDK1	6	0.87868	0.88415	0.999997	1633	1	0.21877	0.083473	0.21253	0.999946	351	3	0.21877\	3.58255
CDC73	6	0.2491	0.44184	0.999997	822	1	0.24678	0.083483	0.21254	0.999946	352	4	0.24678\	3.58237
ANP32B	6	0.68707	0.78975	0.999997	1431	1	0.26051	0.083559	0.21267	0.999946	353	4	0.26051\	3.58106
TRIM24	6	0.69561	0.79266	0.999997	1437	1	0.10636	0.083953	0.21358	0.999946	354	2	0.10636\	3.57427
RNF8	6	0.92808	0.92862	0.999997	1722	0	0.23952	0.083957	0.21358	0.999946	355	3	0.23952\	3.57421
REST	6	0.16884	0.33941	0.999997	646	2	0.08581	0.084433	0.21446	0.999946	356	3	0.08581\	3.56605
PARP1	6	0.82165	0.84763	0.999997	1554	1	0.15618	0.084993	0.21583	0.999946	357	3	0.15618\	3.55651
RNF2	6	0.46061	0.62958	0.999997	1151	2	0.063144	0.08518	0.21621	0.999946	358	3	0.063144\	3.55334
NTC_new_478	6	0.6292	0.75956	0.999997	1373	1	0.14676	0.085204	0.21625	0.999946	359	4	0.14676\	3.55294
NTC_new_550	6	0.76906	0.82134	0.999997	1501	1	0.14713	0.085204	0.21625	0.999946	360	4	0.14713\	3.55294
HIST1H2BG	6	0.95033	0.95118	0.999997	1757	0	0.13979	0.085975	0.21767	0.999946	361	3	0.13979\	3.53994
AURKA	6	0.91181	0.91259	0.999997	1688	1	0.31222	0.086074	0.21793	0.999946	362	3	0.31222\	3.53828
NAT10	6	0.43124	0.60783	0.999997	1114	2	0.14919	0.086567	0.21888	0.999946	363	3	0.14919\	3.53004
ELP5	6	0.84583	0.86157	0.999997	1583	1	0.2113	0.086719	0.21918	0.999946	364	3	0.2113\	3.52751
ERBB4	6	0.79036	0.83132	0.999997	1522	1	0.12617	0.086792	0.21935	0.999946	365	4	0.12617\	3.52629
HDAC7	6	0.72713	0.80416	0.999997	1454	1	0.06505	0.087027	0.21979	0.999946	366	2	0.06505\	3.52239
PHF8	6	0.92877	0.92933	0.999997	1724	0	0.13733	0.087104	0.21993	0.999946	367	4	0.13733\	3.52112
PRDM11	6	0.64179	0.7701	0.999997	1399	1	0.22041	0.087338	0.22045	0.999946	368	4	0.22041\	3.51725
PRDM2	6	0.91317	0.91377	0.999997	1693	1	0.13767	0.087658	0.2211	0.999946	369	3	0.13767\	3.51197
CHD7	6	0.58932	0.72831	0.999997	1321	2	0.15288	0.087788	0.22139	0.999946	370	3	0.15288\	3.50983
ATAT1	6	0.34851	0.54907	0.999997	1001	1	0.044816	0.087956	0.22176	0.999946	371	2	0.044816\	3.50707
RBBP7	6	0.98391	0.98386	0.999997	1848	0	0.21134	0.088122	0.2221	0.999946	372	4	0.21134\	3.50435
DDX50	6	0.1023	0.24995	0.960768	499	3	-0.18609	0.088578	0.22301	0.999946	373	2	-0.18609\	3.49691
SAP30L	6	0.42081	0.60053	0.999997	1093	2	0.065942	0.088889	0.22361	0.999946	374	3	0.065942\	3.49185
PRKAB2	6	0.43253	0.60876	0.999997	1116	1	0.085906	0.089258	0.22426	0.999946	375	3	0.085906\	3.48587
CDC6	6	0.45335	0.62409	0.999997	1143	2	-1.9815e-06	0.090764	0.22741	0.999946	376	3	-1.9815e-06\	3.46174
NTC_new_778	6	0.43102	0.6076	0.999997	1113	2	0.10361	0.090771	0.22741	0.999946	377	3	0.10361\	3.46162
CHEK1	6	0.64494	0.77274	0.999997	1403	2	0.17288	0.092087	0.23023	0.999946	378	3	0.17288\	3.44086
APOBEC3G	6	0.97537	0.97537	0.999997	1822	0	0.20224	0.092351	0.2308	0.999946	379	4	0.20224\	3.43673
HCFC2	6	0.95253	0.95299	0.999997	1761	0	0.16884	0.092432	0.23098	0.999946	380	4	0.16884\	3.43546
BRCA1	6	0.58211	0.72254	0.999997	1313	2	0.15115	0.092706	0.23147	0.999946	381	3	0.15115\	3.43119
PRDM4	6	0.33023	0.53665	0.999997	988	2	0.16449	0.092999	0.23203	0.999946	382	4	0.16449\	3.42664
SMARCA2	6	0.56449	0.70876	0.999997	1283	1	0.19687	0.093039	0.2321	0.999946	383	3	0.19687\	3.42602
E2F6	6	0.7881	0.83008	0.999997	1516	1	0.22787	0.093116	0.23228	0.999946	384	3	0.22787\	3.42483
PDP1	6	0.61903	0.75161	0.999997	1360	1	0.13512	0.093325	0.23269	0.999946	385	4	0.13512\	3.42159
PCGF6	6	0.36404	0.55991	0.999997	1027	2	-0.034452	0.093516	0.23303	0.999946	386	2	-0.034452\	3.41864
NTC_new_228	6	0.24646	0.43861	0.999997	815	3	-0.1147	0.093523	0.23305	0.999946	389	2	-0.1147\	3.41853
NTC_new_460	6	0.059321	0.16158	0.926543	333	3	-0.19947	0.093523	0.23305	0.999946	388	2	-0.19947\	3.41853
NTC_new_508	6	0.18574	0.3611	0.999997	677	3	0.0065813	0.093523	0.23305	0.999946	391	3	0.0065813\	3.41853
NTC_new_633	6	0.41919	0.59937	0.999997	1089	2	0.11168	0.093523	0.23305	0.999946	390	3	0.11168\	3.41853
NTC_new_976	6	0.87721	0.8831	0.999997	1630	1	-0.019005	0.093523	0.23305	0.999946	387	2	-0.019005\	3.41853
PRKCB	6	0.29237	0.49486	0.999997	920	1	0.14643	0.094224	0.23451	0.999946	392	4	0.14643\	3.40776
KDM4C	6	0.21045	0.39267	0.999997	734	2	0.14833	0.09447	0.23504	0.999946	393	4	0.14833\	3.404
PAK2	6	0.11799	0.27131	0.970216	535	3	0.0313	0.095596	0.23735	0.999946	394	3	0.0313\	3.38691
HIF1AN	6	0.90151	0.9033	0.999997	1664	1	0.19763	0.097035	0.24021	0.999946	395	4	0.19763\	3.36535
CTR9	6	0.33612	0.54085	0.999997	990	1	0.17713	0.097202	0.24054	0.999946	396	4	0.17713\	3.36287
BAHD1	6	0.9588	0.9591	0.999997	1783	0	0.18698	0.097285	0.24068	0.999946	397	4	0.18698\	3.36164
PRMT8	6	0.17458	0.34673	0.999997	659	2	0.1226	0.098739	0.24364	0.999946	398	2	0.1226\	3.34024
SMYD5	6	0.86893	0.87711	0.999997	1617	1	0.16383	0.098796	0.24377	0.999946	399	4	0.16383\	3.3394
MORF4L2	6	0.29043	0.4926	0.999997	916	2	0.16829	0.098954	0.24406	0.999946	400	3	0.16829\	3.3371
PRDM14	6	0.69503	0.79246	0.999997	1435	1	0.043503	0.099686	0.24537	0.999946	401	2	0.043503\	3.32647
NTC_new_815	6	0.99602	0.99606	0.999997	1879	0	0.14355	0.099896	0.24574	0.999946	402	4	0.14355\	3.32343
NTC_new_400	6	0.055253	0.15307	0.926106	313	2	0.10536	0.10098	0.24787	0.999946	403	3	0.10536\	3.30786
NTC_new_1087	6	0.45315	0.62398	0.999997	1139	1	0.075972	0.10099	0.2479	0.999946	405	3	0.075972\	3.30772
NTC_new_276	6	0.79578	0.83385	0.999997	1528	1	0.021401	0.10099	0.2479	0.999946	404	2	0.021401\	3.30772
NTC_new_75	6	0.28627	0.48778	0.999997	902	3	-0.10982	0.10099	0.2479	0.999946	406	2	-0.10982\	3.30772
NTC_new_927	6	0.092801	0.2316	0.938947	468	1	0.058339	0.10099	0.2479	0.999946	407	2	0.058339\	3.30772
ING5	6	0.34815	0.54883	0.999997	1000	1	0.13178	0.10152	0.24892	0.999946	408	4	0.13178\	3.30016
ZHX1	6	0.99146	0.99144	0.999997	1867	0	0.1975	0.10221	0.25021	0.999946	409	4	0.1975\	3.29039
SUPT16H	6	0.52091	0.67555	0.999997	1219	1	0.070408	0.10299	0.25177	0.999946	410	2	0.070408\	3.27942
PARP3	6	0.55156	0.699	0.999997	1261	2	0.17435	0.10324	0.2523	0.999946	411	4	0.17435\	3.27593
NTC_new_102	6	0.38038	0.57124	0.999997	1047	2	0.0088887	0.10624	0.25646	0.999946	412	3	0.0088887\	3.2346
NTC_new_883	6	0.47572	0.64117	0.999997	1175	2	-0.038023	0.10624	0.25646	0.999946	413	2	-0.038023\	3.2346
PRM1	6	0.46338	0.63164	0.999997	1155	2	0.094125	0.10694	0.25745	0.999946	414	3	0.094125\	3.22513
EXOSC6	6	0.82482	0.84938	0.999997	1558	1	0.39336	0.10705	0.25763	0.999946	415	3	0.39336\	3.22364
HIST1H1D	6	0.97506	0.97508	0.999997	1819	0	0.22612	0.10716	0.25775	0.999946	416	3	0.22612\	3.22216
NFYC	6	0.70544	0.79627	0.999997	1442	1	0.25562	0.10738	0.258	0.999946	417	3	0.25562\	3.2192
APEX1	6	0.17325	0.34498	0.999997	657	2	0.028828	0.1077	0.2585	0.999946	418	2	0.028828\	3.21491
RBBP4	6	0.54232	0.69172	0.999997	1245	1	0.23679	0.10782	0.25863	0.999946	419	3	0.23679\	3.2133
HDAC2	6	0.706	0.79647	0.999997	1444	1	0.23102	0.10904	0.2603	0.999946	420	3	0.23102\	3.19707
KDM7A	6	0.39207	0.57989	0.999997	1055	1	0.15448	0.10949	0.26083	0.999946	421	3	0.15448\	3.19113
JMJD1C	6	0.85087	0.86461	0.999997	1590	1	0.036107	0.10958	0.26098	0.999946	422	2	0.036107\	3.18994
HIST1H2BN	6	0.35452	0.55297	0.999997	1008	2	0.099665	0.1099	0.26151	0.999946	423	2	0.099665\	3.18574
RCOR3	6	0.24706	0.43931	0.999997	816	2	0.15902	0.10993	0.26156	0.999946	424	3	0.15902\	3.18534
H2BFWT	6	0.06046	0.16412	0.926543	338	3	-0.19912	0.11052	0.26236	0.999946	425	1	-0.19912\	3.17762
YWHAB	6	0.69522	0.79251	0.999997	1436	1	0.12443	0.11057	0.26242	0.999946	426	3	0.12443\	3.17697
KDM3B	6	0.16629	0.33623	0.999997	640	3	-0.13557	0.11158	0.26382	0.999946	427	2	-0.13557\	3.16385
BUB1	6	0.98657	0.98656	0.999997	1851	0	0.1702	0.11192	0.26427	0.999946	428	3	0.1702\	3.15946
NTC_new_28	6	0.89161	0.89451	0.999997	1647	1	0.16318	0.11274	0.26553	0.999946	429	3	0.16318\	3.14893
NTC_new_403	6	0.89161	0.89451	0.999997	1646	1	0.1517	0.11274	0.26553	0.999946	430	3	0.1517\	3.14893
NTC_new_492	6	0.15461	0.32044	0.999997	617	3	-0.006005	0.11274	0.26553	0.999946	431	3	-0.006005\	3.14893
ZNF592	6	0.55405	0.7009	0.999997	1264	1	0.1481	0.11344	0.26645	0.999946	432	3	0.1481\	3.14
USP36	6	0.072853	0.19081	0.938947	386	1	0.13921	0.11428	0.26757	0.999946	433	3	0.13921\	3.12936
ANP32E	6	0.89584	0.89792	0.999997	1655	1	0.23408	0.11489	0.26845	0.999946	434	3	0.23408\	3.12167
HIST1H1T	6	0.91119	0.91204	0.999997	1684	1	0.11153	0.11581	0.26973	0.999946	435	3	0.11153\	3.11017
CDYL2	6	0.18258	0.35719	0.999997	671	3	-0.056643	0.11717	0.27135	0.999946	436	2	-0.056643\	3.09332
ACTR6	6	0.9825	0.98243	0.999997	1842	0	0.19984	0.1173	0.27155	0.999946	437	3	0.19984\	3.09173
NTC_new_119	6	0.24861	0.44121	0.999997	821	2	0.010183	0.11869	0.27336	0.999946	450	2	0.010183\	3.07473
NTC_new_208	6	0.17266	0.34419	0.999997	649	3	-0.043819	0.11869	0.27336	0.999946	451	2	-0.043819\	3.07473
NTC_new_253	6	0.26166	0.45748	0.999997	845	3	0.043225	0.11869	0.27336	0.999946	449	3	0.043225\	3.07473
NTC_new_292	6	0.73975	0.80917	0.999997	1462	1	-0.08805	0.11869	0.27336	0.999946	440	2	-0.08805\	3.07473
NTC_new_410	6	0.055253	0.15307	0.926106	311	2	0.099929	0.11869	0.27336	0.999946	446	3	0.099929\	3.07473
NTC_new_416	6	0.10591	0.25468	0.960768	504	2	0.014109	0.11869	0.27336	0.999946	443	1	0.014109\	3.07473
NTC_new_540	6	0.47572	0.64117	0.999997	1177	2	0.13161	0.11869	0.27336	0.999946	445	3	0.13161\	3.07473
NTC_new_542	6	0.81968	0.84648	0.999997	1553	1	-0.023949	0.11869	0.27336	0.999946	438	1	-0.023949\	3.07473
NTC_new_740	6	0.078516	0.20248	0.938947	409	4	-0.20338	0.11869	0.27336	0.999946	442	2	-0.20338\	3.07473
NTC_new_749	6	0.15023	0.3144	0.999997	599	3	-0.098539	0.11869	0.27336	0.999946	447	1	-0.098539\	3.07473
NTC_new_792	6	0.05695	0.15659	0.926106	327	3	-0.18826	0.11869	0.27336	0.999946	439	2	-0.18826\	3.07473
NTC_new_873	6	0.67207	0.78474	0.999997	1423	1	0.059	0.11869	0.27336	0.999946	441	1	0.059\	3.07473
NTC_new_99	6	0.023734	0.079635	0.846184	179	4	-0.32158	0.11869	0.27336	0.999946	448	1	-0.32158\	3.07473
NTC_new_992	6	0.47544	0.64095	0.999997	1168	2	-0.11376	0.11869	0.27336	0.999946	444	2	-0.11376\	3.07473
NTC_new_231	6	0.71952	0.80148	0.999997	1450	1	0.13513	0.11874	0.27343	0.999946	453	3	0.13513\	3.07412
NTC_new_581	6	0.30519	0.5107	0.999997	943	3	0.020743	0.11874	0.27343	0.999946	452	3	0.020743\	3.07412
L3MBTL4	6	0.31856	0.52724	0.999997	969	2	0.14158	0.12054	0.27575	0.999946	454	3	0.14158\	3.05242
NTC_new_1049	6	0.080105	0.20564	0.938947	417	3	-0.074571	0.12078	0.27608	0.999946	455	2	-0.074571\	3.04955
NTC_new_783	6	0.21974	0.40437	0.999997	755	2	0.12648	0.12078	0.27608	0.999946	456	3	0.12648\	3.04955
NTC_new_784	6	0.69049	0.7909	0.999997	1434	1	0.10471	0.12078	0.27608	0.999946	457	3	0.10471\	3.04955
NTC_new_42	6	0.034118	0.10501	0.846184	230	3	-0.013758	0.123	0.27899	0.999946	458	3	-0.013758\	3.02327
NTC_new_685	6	0.35624	0.5542	0.999997	1013	2	0.13863	0.123	0.27899	0.999946	459	3	0.13863\	3.02327
HIST1H2AG	6	0.84496	0.86098	0.999997	1582	1	0.010818	0.12407	0.28035	0.999946	460	2	0.010818\	3.01077
HIST2H2BF	6	0.77901	0.82585	0.999997	1508	1	0.17442	0.12501	0.28147	0.999946	461	3	0.17442\	2.99988
RAD54L	6	0.17368	0.34553	0.999997	658	3	-0.054132	0.12547	0.28202	0.999946	462	2	-0.054132\	2.99459
PHF1	6	0.77842	0.8256	0.999997	1507	1	0.18118	0.12599	0.28262	0.999946	463	3	0.18118\	2.98862
HIST1H3F	6	0.21696	0.40071	0.999997	747	3	-0.1292	0.12772	0.28487	0.999946	464	1	-0.1292\	2.96894
NTC_new_130	6	0.38038	0.57124	0.999997	1044	1	0.16899	0.12806	0.28537	0.999946	471	3	0.16899\	2.96511
NTC_new_166	6	0.52758	0.68055	0.999997	1230	1	0.15169	0.12806	0.28537	0.999946	465	3	0.15169\	2.96511
NTC_new_203	6	0.55528	0.7018	0.999997	1268	2	0.060006	0.12806	0.28537	0.999946	467	3	0.060006\	2.96511
NTC_new_209	6	0.22917	0.41651	0.999997	772	2	0.18291	0.12806	0.28537	0.999946	466	3	0.18291\	2.96511
NTC_new_840	6	0.26563	0.46239	0.999997	860	1	0.14638	0.12806	0.28537	0.999946	470	3	0.14638\	2.96511
NTC_new_868	6	0.22935	0.41679	0.999997	780	2	0.16008	0.12806	0.28537	0.999946	469	3	0.16008\	2.96511
NTC_new_882	6	0.42436	0.60304	0.999997	1096	2	0.074634	0.12806	0.28537	0.999946	468	3	0.074634\	2.96511
GATAD2A	6	0.029667	0.094395	0.846184	207	4	-0.39503	0.12827	0.28565	0.999946	472	2	-0.39503\	2.96274
DPPA3	6	0.90476	0.90621	0.999997	1668	1	0.17848	0.12844	0.28583	0.999946	473	3	0.17848\	2.96083
ARID2	6	0.86283	0.87269	0.999997	1613	1	0.14153	0.12864	0.28606	0.999946	474	3	0.14153\	2.95859
CUL4A	6	0.35367	0.55243	0.999997	1007	2	0.016093	0.12897	0.28654	0.999946	475	3	0.016093\	2.95489
CBX2	6	8.019e-06	3.3276e-05	0.064356	1	3	-0.18052	0.13021	0.28816	0.999946	476	2	-0.18052\	2.94109
PADI1	6	0.95748	0.9578	0.999997	1778	0	0.1674	0.13029	0.2883	0.999946	477	3	0.1674\	2.9402
HIST2H2AC	6	0.71664	0.80035	0.999997	1449	1	0.14165	0.13041	0.28852	0.999946	478	3	0.14165\	2.93887
ZMYM2	6	0.40994	0.59266	0.999997	1073	2	0.070844	0.13094	0.28931	0.999946	479	2	0.070844\	2.93302
SAP18	6	0.72766	0.80438	0.999997	1455	1	0.13948	0.13127	0.28974	0.999946	480	2	0.13948\	2.92939
HLCS	6	0.047838	0.13673	0.926106	281	2	0.047784	0.1318	0.29037	0.999946	481	3	0.047784\	2.92358
BARD1	6	0.75381	0.81492	0.999997	1482	1	0.055198	0.13186	0.29043	0.999946	482	3	0.055198\	2.92292
SUV420H1	6	0.43574	0.61132	0.999997	1118	1	0.21561	0.13223	0.29097	0.999946	483	3	0.21561\	2.91888
HIST1H1A	6	0.19635	0.37459	0.999997	702	2	0.13733	0.13321	0.29233	0.999946	484	3	0.13733\	2.90823
CHAF1B	6	0.2851	0.48635	0.999997	900	2	-0.024392	0.13333	0.2925	0.999946	485	3	-0.024392\	2.90693
HIST1H2AH	6	0.0078096	0.03118	0.71227	81	5	-0.38801	0.13369	0.29305	0.999946	486	1	-0.38801\	2.90304
NTC_new_852	6	0.44325	0.61649	0.999997	1127	2	0.164	0.13536	0.29534	0.999946	487	3	0.164\	2.88513
NTC_new_993	6	0.83641	0.856	0.999997	1571	1	0.0058888	0.13536	0.29534	0.999946	488	2	0.0058888\	2.88513
GATAD2B	6	0.62902	0.75939	0.999997	1372	2	0.17527	0.13554	0.29558	0.999946	489	3	0.17527\	2.88321
L3MBTL3	6	0.90454	0.90605	0.999997	1667	1	0.070377	0.13715	0.29771	0.999946	490	2	0.070377\	2.86617
NTC_new_498	6	0.79578	0.83385	0.999997	1527	1	0.061687	0.13727	0.29788	0.999946	491	3	0.061687\	2.86491
NTC_new_558	6	0.83108	0.85279	0.999997	1566	1	0.030853	0.13727	0.29788	0.999946	492	3	0.030853\	2.86491
NTC_new_715	6	0.38568	0.57512	0.999997	1051	2	0.10883	0.13727	0.29788	0.999946	493	3	0.10883\	2.86491
ZBTB33	6	0.97514	0.97513	0.999997	1820	0	0.16231	0.13732	0.29793	0.999946	494	3	0.16231\	2.86439
SUV420H2	6	0.39778	0.58389	0.999997	1066	2	0.068851	0.13864	0.29971	0.999946	495	3	0.068851\	2.85058
HIST1H4C	6	0.016164	0.059844	0.761432	152	3	0.031174	0.13901	0.30018	0.999946	496	3	0.031174\	2.84674
NTC_new_355	6	0.88841	0.89165	0.999997	1643	1	0.049018	0.14066	0.30243	0.999946	497	2	0.049018\	2.82972
NTC_new_373	6	0.0098569	0.038168	0.71227	90	3	-0.24463	0.14066	0.30243	0.999946	498	2	-0.24463\	2.82972
NTC_new_645	6	0.34701	0.54793	0.999997	998	2	-0.11991	0.14066	0.30243	0.999946	499	2	-0.11991\	2.82972
SMARCD1	6	0.48277	0.64661	0.999997	1184	1	0.11405	0.14177	0.30387	0.999946	500	3	0.11405\	2.81838
ZMYND8	6	0.75748	0.8164	0.999997	1487	1	-0.063109	0.14191	0.30407	0.999946	501	2	-0.063109\	2.81695
EP300	6	0.64971	0.77685	0.999997	1412	2	0.080739	0.14227	0.30452	0.999946	502	3	0.080739\	2.8133
HIST1H2BF	6	0.41225	0.59428	0.999997	1082	2	-0.024332	0.14346	0.30614	0.999946	503	3	-0.024332\	2.80128
NTC_new_101	6	0.21222	0.39493	0.999997	737	2	0.065323	0.14417	0.3073	0.999946	506	3	0.065323\	2.79416
NTC_new_1026	6	0.18574	0.3611	0.999997	682	1	0.13793	0.14417	0.3073	0.999946	505	3	0.13793\	2.79416
NTC_new_605	6	0.81192	0.84229	0.999997	1543	1	0.1265	0.14417	0.3073	0.999946	504	3	0.1265\	2.79416
CBX8	6	0.11564	0.26835	0.970216	532	2	0.060621	0.14544	0.30898	0.999946	507	3	0.060621\	2.7815
ELP6	6	0.47137	0.63782	0.999997	1165	2	0.11179	0.14595	0.30959	0.999946	508	3	0.11179\	2.77645
PADI3	6	0.0448	0.12962	0.919251	271	3	-0.02626	0.1462	0.30999	0.999946	509	3	-0.02626\	2.77398
HIST1H4B	6	0.80992	0.84122	0.999997	1540	1	0.16243	0.14748	0.31172	0.999946	510	3	0.16243\	2.76141
KAT2A	6	0.63024	0.76046	0.999997	1379	2	0.077402	0.14787	0.31222	0.999946	511	3	0.077402\	2.7576
NTC_new_219	6	0.77404	0.82356	0.999997	1503	1	0.079699	0.14812	0.31259	0.999946	518	2	0.079699\	2.75516
NTC_new_239	6	0.084797	0.21531	0.938947	439	2	0.0026109	0.14812	0.31259	0.999946	516	2	0.0026109\	2.75516
NTC_new_306	6	0.69049	0.7909	0.999997	1433	1	0.049334	0.14812	0.31259	0.999946	514	2	0.049334\	2.75516
NTC_new_419	6	0.0041957	0.017767	0.58871	56	4	-0.29474	0.14812	0.31259	0.999946	517	2	-0.29474\	2.75516
NTC_new_676	6	0.29173	0.49402	0.999997	919	3	0.04853	0.14812	0.31259	0.999946	513	3	0.04853\	2.75516
NTC_new_70	6	0.87425	0.88098	0.999997	1627	1	0.057123	0.14812	0.31259	0.999946	515	3	0.057123\	2.75516
NTC_new_979	6	0.61416	0.74787	0.999997	1355	2	0.070122	0.14812	0.31259	0.999946	512	3	0.070122\	2.75516
NTC_new_171	6	0.67207	0.78474	0.999997	1424	1	0.081003	0.14954	0.31437	0.999946	521	3	0.081003\	2.7414
NTC_new_399	6	0.49808	0.6581	0.999997	1194	2	0.14323	0.14954	0.31437	0.999946	519	3	0.14323\	2.7414
NTC_new_587	6	0.21222	0.39493	0.999997	735	3	-0.0056377	0.14954	0.31437	0.999946	520	3	-0.0056377\	2.7414
NTC_new_1059	6	0.33654	0.5411	0.999997	992	2	0.015346	0.15142	0.31691	0.999946	524	3	0.015346\	2.72337
NTC_new_143	6	0.27347	0.47217	0.999997	880	3	-0.14172	0.15142	0.31691	0.999946	533	1	-0.14172\	2.72337
NTC_new_285	6	0.48796	0.65028	0.999997	1187	1	0.09889	0.15142	0.31691	0.999946	523	3	0.09889\	2.72337
NTC_new_314	6	0.28627	0.48778	0.999997	905	3	-0.045993	0.15142	0.31691	0.999946	536	2	-0.045993\	2.72337
NTC_new_446	6	0.44006	0.61437	0.999997	1123	2	0.05396	0.15142	0.31691	0.999946	529	3	0.05396\	2.72337
NTC_new_458	6	0.60744	0.74246	0.999997	1348	2	0.061032	0.15142	0.31691	0.999946	537	3	0.061032\	2.72337
NTC_new_572	6	0.35624	0.5542	0.999997	1016	2	-0.0097069	0.15142	0.31691	0.999946	535	2	-0.0097069\	2.72337
NTC_new_595	6	0.026365	0.086301	0.846184	192	4	-0.22166	0.15142	0.31691	0.999946	525	1	-0.22166\	2.72337
NTC_new_666	6	0.075451	0.19613	0.938947	401	4	-0.18407	0.15142	0.31691	0.999946	526	2	-0.18407\	2.72337
NTC_new_710	6	0.48142	0.64552	0.999997	1182	2	-0.085584	0.15142	0.31691	0.999946	528	1	-0.085584\	2.72337
NTC_new_793	6	0.58674	0.7263	0.999997	1316	2	0.049767	0.15142	0.31691	0.999946	530	2	0.049767\	2.72337
NTC_new_797	6	0.44954	0.62127	0.999997	1134	2	0.0028118	0.15142	0.31691	0.999946	532	2	0.0028118\	2.72337
NTC_new_827	6	0.033197	0.10304	0.846184	221	3	-0.11549	0.15142	0.31691	0.999946	531	2	-0.11549\	2.72337
NTC_new_92	6	0.15461	0.32044	0.999997	616	3	-0.084161	0.15142	0.31691	0.999946	527	1	-0.084161\	2.72337
NTC_new_953	6	0.17266	0.34419	0.999997	650	2	-0.10994	0.15142	0.31691	0.999946	534	1	-0.10994\	2.72337
NTC_new_98	6	0.63416	0.76372	0.999997	1381	2	0.0037181	0.15142	0.31691	0.999946	522	2	0.0037181\	2.72337
KDM4D	6	0.82506	0.8495	0.999997	1559	1	0.049899	0.15189	0.31755	0.999946	538	3	0.049899\	2.7189
AURKC	6	0.98711	0.98715	0.999997	1853	0	0.14441	0.15213	0.31786	0.999946	539	3	0.14441\	2.71662
KDM4E	6	0.94796	0.94863	0.999997	1748	0	0.11722	0.15252	0.31843	0.999946	540	3	0.11722\	2.71293
NTC_new_23	6	0.35624	0.5542	0.999997	1015	2	0.045387	0.15435	0.321	0.999946	541	3	0.045387\	2.69572
NTC_new_257	6	0.65016	0.77724	0.999997	1413	1	0.16188	0.15435	0.321	0.999946	542	3	0.16188\	2.69572
NTC_new_944	6	0.81968	0.84648	0.999997	1552	1	0.10039	0.15504	0.32189	0.999946	543	3	0.10039\	2.68929
PHF21A	6	0.19721	0.37572	0.999997	704	2	-0.092324	0.15726	0.3249	0.999946	544	1	-0.092324\	2.66878
BAZ1A	6	0.89338	0.8959	0.999997	1651	1	0.17576	0.15802	0.3259	0.999946	545	3	0.17576\	2.66182
NTC_new_616	6	0.13827	0.29818	0.985775	581	2	0.07998	0.16064	0.32945	0.999946	548	2	0.07998\	2.6381
NTC_new_779	6	0.066773	0.17774	0.926543	362	1	0.10469	0.16064	0.32945	0.999946	546	2	0.10469\	2.6381
NTC_new_821	6	0.26267	0.45861	0.999997	851	2	-0.12723	0.16064	0.32945	0.999946	549	2	-0.12723\	2.6381
NTC_new_825	6	0.92616	0.92682	0.999997	1718	0	0.035576	0.16064	0.32945	0.999946	547	2	0.035576\	2.6381
NTC_new_232	6	0.55968	0.7052	0.999997	1272	1	0.15609	0.16141	0.33046	0.999946	550	3	0.15609\	2.6312
PHF20L1	6	0.0033533	0.014572	0.541984	52	3	-0.045889	0.16217	0.33145	0.999946	551	1	-0.045889\	2.62442
SATB1	6	0.40089	0.58631	0.999997	1067	1	0.022331	0.16262	0.33202	0.999946	552	1	0.022331\	2.62042
HIST1H2AE	6	0.50682	0.66477	0.999997	1202	2	0.12319	0.16375	0.33352	0.999946	553	3	0.12319\	2.61043
EYA1	6	0.16217	0.33059	0.999997	628	2	-0.071973	0.16383	0.33365	0.999946	554	2	-0.071973\	2.60973
HMGB2	6	0.41078	0.59324	0.999997	1079	2	0.090606	0.16402	0.33391	0.999946	555	3	0.090606\	2.60806
SIRT4	6	0.16662	0.3366	0.999997	641	2	0.074451	0.16416	0.33411	0.999946	556	3	0.074451\	2.60683
TET2	6	0.98227	0.98217	0.999997	1841	0	0.12244	0.16421	0.33418	0.999946	557	3	0.12244\	2.60639
SMARCE1	6	0.91009	0.91107	0.999997	1680	1	-0.1014	0.16459	0.33481	0.999946	558	2	-0.1014\	2.60305
USP46	6	0.28892	0.4908	0.999997	908	3	-0.16724	0.16484	0.33509	0.999946	559	2	-0.16724\	2.60086
KDM2B	6	0.1106	0.26128	0.96803	522	3	-0.19388	0.16591	0.33664	0.999946	560	2	-0.19388\	2.59153
NTC_new_1	6	0.76087	0.81774	0.999997	1492	1	0.11708	0.16631	0.33708	0.999946	562	3	0.11708\	2.58805
NTC_new_938	6	0.43102	0.6076	0.999997	1110	2	0.11638	0.16631	0.33708	0.999946	563	3	0.11638\	2.58805
NTC_new_942	6	0.94316	0.94404	0.999997	1745	0	0.11804	0.16631	0.33708	0.999946	561	3	0.11804\	2.58805
RSF1	6	0.42475	0.6033	0.999997	1099	1	0.13266	0.16723	0.33825	0.999946	564	3	0.13266\	2.58009
SFMBT1	6	0.040919	0.1207	0.908443	252	2	0.094035	0.16742	0.33844	0.999946	565	3	0.094035\	2.57846
PRDM13	6	0.18441	0.35935	0.999997	673	3	-0.068047	0.16761	0.33866	0.999946	566	3	-0.068047\	2.57682
C11ORF30	6	0.84176	0.85909	0.999997	1577	1	0.18836	0.16862	0.3399	0.999946	567	3	0.18836\	2.56815
BRD9	6	0.13912	0.29932	0.986177	587	2	0.2213	0.16889	0.34027	0.999946	568	3	0.2213\	2.56584
TAF8	6	0.98069	0.9807	0.999997	1836	0	0.094335	0.16972	0.34133	0.999946	569	3	0.094335\	2.55877
HMGN3	6	0.54286	0.69211	0.999997	1246	2	0.046626	0.16998	0.34168	0.999946	570	3	0.046626\	2.55656
BRD3	6	0.098848	0.24383	0.960768	489	3	-0.10833	0.17065	0.34253	0.999946	571	2	-0.10833\	2.55089
SFPQ	6	0.98268	0.98266	0.999997	1845	0	0.19033	0.17149	0.3435	0.999946	572	3	0.19033\	2.5438
USP44	6	0.29315	0.49576	0.999997	922	1	0.074814	0.17189	0.34397	0.999946	573	3	0.074814\	2.54044
ATRX	6	0.57765	0.719	0.999997	1304	2	0.028803	0.17218	0.34433	0.999946	574	2	0.028803\	2.53801
PHF2	6	0.30191	0.50669	0.999997	941	3	-0.10569	0.17237	0.34458	0.999946	575	2	-0.10569\	2.53642
FOXA1	6	0.89306	0.89563	0.999997	1649	1	-0.038006	0.17325	0.34576	0.999946	576	2	-0.038006\	2.52907
NTC_new_234	6	0.31012	0.51697	0.999997	952	2	0.14934	0.17327	0.34578	0.999946	577	3	0.14934\	2.52891
NTC_new_312	6	0.58051	0.72119	0.999997	1310	1	0.13228	0.17327	0.34578	0.999946	579	3	0.13228\	2.52891
NTC_new_628	6	0.76087	0.81774	0.999997	1491	1	0.18291	0.17327	0.34578	0.999946	581	3	0.18291\	2.52891
NTC_new_735	6	0.92089	0.92155	0.999997	1710	0	0.14144	0.17327	0.34578	0.999946	578	3	0.14144\	2.52891
NTC_new_93	6	0.61508	0.74857	0.999997	1358	1	0.12965	0.17327	0.34578	0.999946	580	3	0.12965\	2.52891
SSRP1	6	0.012599	0.047485	0.723303	122	2	0.057393	0.1737	0.34634	0.999946	582	2	0.057393\	2.52533
VDR	6	0.85924	0.87027	0.999997	1606	1	0.10203	0.17428	0.34711	0.999946	583	2	0.10203\	2.52052
PRDM6	6	0.51831	0.67361	0.999997	1217	2	0.058212	0.17492	0.34797	0.999946	584	3	0.058212\	2.51523
UIMC1	6	0.74184	0.81002	0.999997	1465	1	0.10032	0.17502	0.34809	0.999946	585	2	0.10032\	2.51441
RMI1	6	0.85813	0.86946	0.999997	1602	1	0.088543	0.17697	0.35074	0.999946	586	3	0.088543\	2.49842
NTC_new_1002	6	0.15461	0.32044	0.999997	615	3	0.015605	0.17804	0.35211	0.999946	587	3	0.015605\	2.48973
NTC_new_158	6	0.90876	0.90979	0.999997	1676	1	0.12981	0.17804	0.35211	0.999946	591	3	0.12981\	2.48973
NTC_new_224	6	0.58674	0.7263	0.999997	1315	2	0.13965	0.17804	0.35211	0.999946	592	3	0.13965\	2.48973
NTC_new_255	6	0.24154	0.43214	0.999997	808	2	0.079846	0.17804	0.35211	0.999946	588	3	0.079846\	2.48973
NTC_new_360	6	0.27809	0.47793	0.999997	893	2	0.078246	0.17804	0.35211	0.999946	589	3	0.078246\	2.48973
NTC_new_849	6	0.18034	0.35431	0.999997	668	2	0.18726	0.17804	0.35211	0.999946	590	3	0.18726\	2.48973
PWWP2B	6	0.025302	0.083659	0.846184	186	2	0.13858	0.18048	0.35522	0.999946	593	3	0.13858\	2.47009
NTC_new_1028	6	0.86159	0.8718	0.999997	1612	1	0.042094	0.18063	0.35542	0.999946	594	3	0.042094\	2.46889
NTC_new_134	6	0.41043	0.59302	0.999997	1077	1	0.064592	0.18063	0.35542	0.999946	595	2	0.064592\	2.46889
NTC_new_49	6	0.60011	0.73668	0.999997	1333	2	0.067266	0.18063	0.35542	0.999946	597	3	0.067266\	2.46889
NTC_new_898	6	0.043387	0.12627	0.908443	266	4	-0.18895	0.18063	0.35542	0.999946	596	2	-0.18895\	2.46889
NTC_new_1003	6	0.37183	0.56536	0.999997	1036	2	-0.078488	0.18203	0.35727	0.999946	607	2	-0.078488\	2.45775
NTC_new_1054	6	0.23004	0.41773	0.999997	785	3	-0.060009	0.18203	0.35727	0.999946	606	2	-0.060009\	2.45775
NTC_new_210	6	0.34701	0.54793	0.999997	997	2	0.00068331	0.18203	0.35727	0.999946	603	3	0.00068331\	2.45775
NTC_new_217	6	0.54338	0.69259	0.999997	1248	2	-0.099205	0.18203	0.35727	0.999946	602	2	-0.099205\	2.45775
NTC_new_262	6	0.20058	0.38002	0.999997	711	2	-0.039377	0.18203	0.35727	0.999946	605	2	-0.039377\	2.45775
NTC_new_289	6	0.050384	0.14248	0.926106	289	3	-0.087402	0.18203	0.35727	0.999946	599	2	-0.087402\	2.45775
NTC_new_37	6	0.032963	0.10246	0.846184	217	3	-0.15934	0.18203	0.35727	0.999946	601	2	-0.15934\	2.45775
NTC_new_429	6	0.96836	0.96859	0.999997	1805	0	0.044144	0.18203	0.35727	0.999946	614	1	0.044144\	2.45775
NTC_new_512	6	0.0016479	0.0079019	0.441443	34	4	-0.32619	0.18203	0.35727	0.999946	610	1	-0.32619\	2.45775
NTC_new_548	6	0.10584	0.25458	0.960768	500	3	-0.096264	0.18203	0.35727	0.999946	612	1	-0.096264\	2.45775
NTC_new_57	6	0.56893	0.7122	0.999997	1288	2	0.064765	0.18203	0.35727	0.999946	608	3	0.064765\	2.45775
NTC_new_576	6	0.47572	0.64117	0.999997	1178	2	-0.021681	0.18203	0.35727	0.999946	600	2	-0.021681\	2.45775
NTC_new_602	6	0.54338	0.69259	0.999997	1249	2	0.097378	0.18203	0.35727	0.999946	598	3	0.097378\	2.45775
NTC_new_704	6	0.31057	0.51745	0.999997	955	1	-0.011579	0.18203	0.35727	0.999946	604	2	-0.011579\	2.45775
NTC_new_759	6	0.088889	0.22357	0.938947	453	2	0.048141	0.18203	0.35727	0.999946	615	1	0.048141\	2.45775
NTC_new_933	6	0.010032	0.038772	0.71227	104	3	-0.17491	0.18203	0.35727	0.999946	609	2	-0.17491\	2.45775
NTC_new_972	6	0.0098569	0.038168	0.71227	91	3	-0.19757	0.18203	0.35727	0.999946	611	2	-0.19757\	2.45775
NTC_new_995	6	0.23528	0.4243	0.999997	795	2	-0.05824	0.18203	0.35727	0.999946	613	2	-0.05824\	2.45775
CHD5	6	0.042868	0.12512	0.908443	264	3	-0.14779	0.18334	0.35885	0.999946	616	2	-0.14779\	2.44741
NTC_new_418	6	0.12194	0.27642	0.970216	547	1	0.14536	0.18661	0.36303	0.999946	618	3	0.14536\	2.4219
NTC_new_932	6	0.20058	0.38002	0.999997	707	2	0.15089	0.18661	0.36303	0.999946	617	3	0.15089\	2.4219
EID2B	6	0.071232	0.18738	0.938947	382	3	-0.049443	0.18684	0.3633	0.999946	619	3	-0.049443\	2.42012
UBE2A	6	0.89924	0.90114	0.999997	1660	1	0.15409	0.18722	0.36373	0.999946	620	3	0.15409\	2.41719
ERCC6	6	0.61808	0.75088	0.999997	1359	2	-0.014355	0.188	0.36482	0.999946	621	2	-0.014355\	2.4112
NTC_new_534	6	0.54887	0.69689	0.999997	1258	2	0.039035	0.1896	0.36698	0.999946	623	3	0.039035\	2.39897
NTC_new_713	6	0.53704	0.68791	0.999997	1242	1	0.15361	0.1896	0.36698	0.999946	622	3	0.15361\	2.39897
NTC_new_819	6	0.89161	0.89451	0.999997	1645	1	0.15631	0.1896	0.36698	0.999946	624	3	0.15631\	2.39897
DAPK3	6	0.31879	0.5275	0.999997	970	3	-0.1565	0.19073	0.36846	0.999946	625	2	-0.1565\	2.3904
SUV39H2	6	0.1708	0.34193	0.999997	647	3	-0.057665	0.19246	0.37069	0.999946	626	3	-0.057665\	2.37737
NTC_new_820	6	0.17985	0.35372	0.999997	665	3	-0.025309	0.19289	0.37126	0.999946	627	3	-0.025309\	2.37415
NTC_new_9	6	0.10007	0.24611	0.960768	492	3	-0.13877	0.19289	0.37126	0.999946	628	2	-0.13877\	2.37415
NTC_new_914	6	0.70897	0.79763	0.999997	1446	1	0.087576	0.19289	0.37126	0.999946	629	3	0.087576\	2.37415
PRMT7	6	0.093919	0.23386	0.944222	479	3	0.022118	0.1957	0.37458	0.999946	630	3	0.022118\	2.35328
ARID1B	6	0.75509	0.81543	0.999997	1485	1	0.093785	0.19592	0.3748	0.999946	631	3	0.093785\	2.35166
MAP3K7	6	0.80614	0.83921	0.999997	1538	1	0.090425	0.19604	0.37493	0.999946	632	2	0.090425\	2.35078
TDRD1	6	0.27547	0.47473	0.999997	883	2	0.15756	0.19614	0.37503	0.999946	633	3	0.15756\	2.35004
DNMT3L	6	0.31642	0.52447	0.999997	966	1	0.095438	0.19781	0.3771	0.999946	634	3	0.095438\	2.33781
TCF19	6	0.073822	0.19275	0.938947	396	2	0.082955	0.1984	0.37786	0.999946	635	3	0.082955\	2.33352
TDRD7	6	0.24828	0.44078	0.999997	817	2	0.11625	0.19936	0.37912	0.999946	636	3	0.11625\	2.32655
TP53BP1	6	0.92745	0.92801	0.999997	1720	0	0.11807	0.2015	0.3819	0.999946	637	3	0.11807\	2.31115
NTC_new_424	6	0.52195	0.6764	0.999997	1224	2	0.061761	0.20152	0.38192	0.999946	640	3	0.061761\	2.31101
NTC_new_525	6	0.41043	0.59302	0.999997	1074	1	0.10876	0.20152	0.38192	0.999946	639	3	0.10876\	2.31101
NTC_new_629	6	0.15122	0.3157	0.999997	606	3	-0.025623	0.20152	0.38192	0.999946	641	3	-0.025623\	2.31101
NTC_new_659	6	0.26267	0.45861	0.999997	849	2	0.10929	0.20152	0.38192	0.999946	638	3	0.10929\	2.31101
TAF9	6	0.60428	0.74004	0.999997	1344	2	-0.03295	0.20193	0.38246	0.999946	642	1	-0.03295\	2.30807
NTC_new_206	6	0.51238	0.66924	0.999997	1209	2	-0.022662	0.20236	0.38296	0.999946	643	2	-0.022662\	2.305
CDY2A	6	0.16551	0.33521	0.999997	639	1	0.0062393	0.20365	0.38464	0.999946	645	3	0.0062393\	2.29584
CDY2B	6	0.16551	0.33521	0.999997	638	1	0.0062393	0.20365	0.38464	0.999946	644	3	0.0062393\	2.29584
SCMH1	6	0.16262	0.33117	0.999997	629	2	0.12122	0.20416	0.38533	0.999946	646	3	0.12122\	2.29223
TAF2	6	0.85193	0.86532	0.999997	1592	1	0.19988	0.2049	0.38632	0.999946	647	3	0.19988\	2.28701
SF3B1	6	0.78178	0.82726	0.999997	1511	1	0.26138	0.20504	0.38645	0.999946	648	3	0.26138\	2.28602
CRB2	6	0.31772	0.52609	0.999997	968	2	0.03069	0.20535	0.38685	0.999946	649	3	0.03069\	2.28384
KDM1B	6	0.12164	0.27602	0.970216	541	2	0.18585	0.20549	0.38707	0.999946	650	3	0.18585\	2.28286
NTC_new_300	6	0.080105	0.20564	0.938947	412	1	0.13378	0.2077	0.38992	0.999946	651	3	0.13378\	2.26743
NTC_new_159	6	0.48796	0.65028	0.999997	1186	2	-0.018261	0.20803	0.39035	0.999946	653	2	-0.018261\	2.26514
NTC_new_174	6	0.014038	0.052359	0.723303	140	3	-0.11623	0.20803	0.39035	0.999946	655	3	-0.11623\	2.26514
NTC_new_608	6	0.53704	0.68791	0.999997	1240	2	0.085933	0.20803	0.39035	0.999946	652	2	0.085933\	2.26514
NTC_new_785	6	0.2979	0.50151	0.999997	933	3	-0.1064	0.20803	0.39035	0.999946	654	2	-0.1064\	2.26514
SRSF3	6	0.12716	0.28296	0.978967	559	3	-0.059494	0.21141	0.39441	0.999946	656	3	-0.059494\	2.24188
RRP8	6	0.84397	0.86037	0.999997	1580	1	0.10816	0.2138	0.3975	0.999946	657	3	0.10816\	2.22567
HIST1H3H	6	0.12864	0.285	0.979157	562	1	0.11315	0.21395	0.3977	0.999946	658	3	0.11315\	2.22465
ZBTB16	6	0.43221	0.60858	0.999997	1115	2	0.017394	0.21485	0.39884	0.999946	659	3	0.017394\	2.2186
NTC_new_1071	6	0.53704	0.68791	0.999997	1239	2	-0.10109	0.21532	0.39937	0.999946	681	1	-0.10109\	2.21545
NTC_new_221	6	0.26267	0.45861	0.999997	852	2	-0.042675	0.21532	0.39937	0.999946	680	2	-0.042675\	2.21545
NTC_new_331	6	0.062064	0.16765	0.926543	345	3	-0.16194	0.21532	0.39937	0.999946	682	1	-0.16194\	2.21545
NTC_new_345	6	0.21674	0.40048	0.999997	744	2	-0.056044	0.21532	0.39937	0.999946	683	2	-0.056044\	2.21545
NTC_new_352	6	0.30159	0.50625	0.999997	940	2	0.061908	0.21532	0.39937	0.999946	665	3	0.061908\	2.21545
NTC_new_453	6	0.93158	0.93235	0.999997	1731	0	0.11856	0.21532	0.39937	0.999946	664	3	0.11856\	2.21545
NTC_new_513	6	0.12436	0.27956	0.973198	554	3	-0.1001	0.21532	0.39937	0.999946	663	3	-0.1001\	2.21545
NTC_new_537	6	0.010032	0.038772	0.71227	94	3	-0.14994	0.21532	0.39937	0.999946	667	1	-0.14994\	2.21545
NTC_new_541	6	0.20663	0.38791	0.999997	723	2	0.11319	0.21532	0.39937	0.999946	666	3	0.11319\	2.21545
NTC_new_586	6	0.092801	0.2316	0.938947	470	3	-0.067102	0.21532	0.39937	0.999946	660	1	-0.067102\	2.21545
NTC_new_664	6	0.00072253	0.0036681	0.354703	20	5	-0.28344	0.21532	0.39937	0.999946	662	1	-0.28344\	2.21545
NTC_new_668	6	0.52195	0.6764	0.999997	1222	2	0.063484	0.21532	0.39937	0.999946	661	2	0.063484\	2.21545
NTC_new_74	6	0.055253	0.15307	0.926106	303	4	-0.20024	0.21532	0.39937	0.999946	676	1	-0.20024\	2.21545
NTC_new_741	6	0.73975	0.80917	0.999997	1464	1	0.045696	0.21532	0.39937	0.999946	675	3	0.045696\	2.21545
NTC_new_744	6	0.21974	0.40437	0.999997	753	3	-0.044555	0.21532	0.39937	0.999946	674	2	-0.044555\	2.21545
NTC_new_758	6	0.2896	0.49163	0.999997	914	2	-0.018116	0.21532	0.39937	0.999946	679	1	-0.018116\	2.21545
NTC_new_762	6	0.013556	0.050798	0.723303	132	4	-0.3402	0.21532	0.39937	0.999946	678	1	-0.3402\	2.21545
NTC_new_77	6	0.035504	0.10835	0.86544	242	4	-0.22108	0.21532	0.39937	0.999946	677	1	-0.22108\	2.21545
NTC_new_770	6	0.24154	0.43214	0.999997	810	2	-0.0061679	0.21532	0.39937	0.999946	670	2	-0.0061679\	2.21545
NTC_new_841	6	0.50589	0.66418	0.999997	1200	2	-0.079445	0.21532	0.39937	0.999946	669	2	-0.079445\	2.21545
NTC_new_867	6	0.0041957	0.017767	0.58871	57	5	-0.31667	0.21532	0.39937	0.999946	668	1	-0.31667\	2.21545
NTC_new_881	6	0.080105	0.20564	0.938947	418	3	-0.04329	0.21532	0.39937	0.999946	673	2	-0.04329\	2.21545
NTC_new_941	6	0.043429	0.12636	0.908443	269	3	-0.24771	0.21532	0.39937	0.999946	672	2	-0.24771\	2.21545
NTC_new_969	6	0.63416	0.76372	0.999997	1383	2	-0.056573	0.21532	0.39937	0.999946	671	1	-0.056573\	2.21545
SMYD1	6	0.26424	0.46056	0.999997	854	3	0.0080271	0.2156	0.3997	0.999946	684	3	0.0080271\	2.21357
NTC_new_1051	6	0.49071	0.65219	0.999997	1188	2	0.071181	0.21741	0.40186	0.999946	685	3	0.071181\	2.20151
NTC_new_669	6	0.82759	0.851	0.999997	1563	1	0.099068	0.21741	0.40186	0.999946	686	3	0.099068\	2.20151
TEX10	6	0.83266	0.85378	0.999997	1567	1	0.21174	0.21922	0.40425	0.999946	687	3	0.21174\	2.18955
NTC_new_606	6	0.043387	0.12627	0.908443	267	4	-0.18385	0.21936	0.40445	0.999946	688	2	-0.18385\	2.18863
TYW5	6	0.74599	0.81176	0.999997	1473	1	0.20226	0.21982	0.40502	0.999946	689	3	0.20226\	2.18561
IKZF3	6	0.86014	0.87088	0.999997	1607	1	0.14672	0.22073	0.40626	0.999946	690	3	0.14672\	2.17965
MYO1C	6	0.19246	0.36998	0.999997	694	3	-0.0041704	0.22134	0.40702	0.999946	691	3	-0.0041704\	2.17566
BABAM1	6	0.76484	0.81941	0.999997	1496	1	0.12525	0.22301	0.40915	0.999946	692	3	0.12525\	2.16482
SETD5	6	0.97525	0.97522	0.999997	1821	0	0.17163	0.22377	0.41004	0.999946	693	3	0.17163\	2.15991
TNP1	6	0.64659	0.77417	0.999997	1407	1	0.029129	0.22477	0.41146	0.999946	694	2	0.029129\	2.15348
NTC_new_491	6	0.39632	0.58295	0.999997	1059	1	0.095198	0.22636	0.4135	0.999946	695	3	0.095198\	2.14331
NTC_new_1062	6	0.85355	0.86636	0.999997	1594	1	-0.005539	0.22765	0.41522	0.999946	701	2	-0.005539\	2.13511
NTC_new_463	6	0.38038	0.57124	0.999997	1046	2	0.13137	0.22765	0.41522	0.999946	696	3	0.13137\	2.13511
NTC_new_482	6	0.80014	0.83598	0.999997	1531	1	0.094116	0.22765	0.41522	0.999946	700	2	0.094116\	2.13511
NTC_new_658	6	0.17266	0.34419	0.999997	651	2	0.012154	0.22765	0.41522	0.999946	702	2	0.012154\	2.13511
NTC_new_801	6	0.24154	0.43214	0.999997	807	2	0.042159	0.22765	0.41522	0.999946	698	3	0.042159\	2.13511
NTC_new_907	6	0.47544	0.64095	0.999997	1169	2	-0.11831	0.22765	0.41522	0.999946	697	2	-0.11831\	2.13511
NTC_new_954	6	0.56279	0.70761	0.999997	1274	2	0.099358	0.22765	0.41522	0.999946	699	2	0.099358\	2.13511
PRDM5	6	0.96054	0.96078	0.999997	1788	0	0.095026	0.22769	0.41528	0.999946	703	3	0.095026\	2.13486
HMG20A	6	0.86044	0.87105	0.999997	1609	1	0.017138	0.23019	0.41837	0.999946	704	2	0.017138\	2.1191
H1FX	6	0.87939	0.88467	0.999997	1635	1	0.081585	0.23035	0.41859	0.999946	705	3	0.081585\	2.1181
UBN1	6	0.62363	0.75515	0.999997	1367	1	0.17334	0.2305	0.41881	0.999946	706	3	0.17334\	2.11716
MEN1	6	0.04653	0.13373	0.926106	278	4	-0.24276	0.2309	0.41926	0.999946	707	2	-0.24276\	2.11466
USP3	6	0.06431	0.17256	0.926543	348	3	-0.097592	0.23189	0.4205	0.999946	708	3	-0.097592\	2.10849
TOP2A	6	0.76546	0.8197	0.999997	1497	1	0.035879	0.23192	0.42052	0.999946	709	2	0.035879\	2.1083
BRMS1L	6	0.64572	0.77342	0.999997	1404	2	0.10847	0.23375	0.42285	0.999946	710	3	0.10847\	2.09696
MSL1	6	0.56681	0.71061	0.999997	1285	1	-0.056874	0.23392	0.42298	0.999946	711	2	-0.056874\	2.09591
NTC_new_1046	6	0.93284	0.93373	0.999997	1734	0	0.080323	0.23545	0.4249	0.999946	714	3	0.080323\	2.08651
NTC_new_11	6	0.60316	0.73914	0.999997	1342	2	0.020097	0.23545	0.4249	0.999946	715	3	0.020097\	2.08651
NTC_new_725	6	0.10817	0.25783	0.960768	518	2	0.096556	0.23545	0.4249	0.999946	713	3	0.096556\	2.08651
NTC_new_897	6	0.44954	0.62127	0.999997	1133	2	0.035025	0.23545	0.4249	0.999946	712	3	0.035025\	2.08651
HIST1H3I	6	0.86912	0.87726	0.999997	1619	1	0.097704	0.23681	0.42651	0.999946	716	3	0.097704\	2.0782
MTA3	6	0.95394	0.95429	0.999997	1767	0	-0.029742	0.23804	0.42811	0.999946	718	1	-0.029742\	2.07072
SRSF1	6	0.097787	0.24174	0.96002	487	4	-0.39297	0.23804	0.4281	0.999946	717	2	-0.39297\	2.07072
PRKAA2	6	0.22319	0.40882	0.999997	761	3	-0.011053	0.23855	0.42869	0.999946	719	3	-0.011053\	2.06764
KAT2B	6	0.32067	0.52953	0.999997	972	3	-0.021681	0.23871	0.42887	0.999946	720	3	-0.021681\	2.06667
ELP4	6	0.36461	0.56023	0.999997	1029	2	0.15273	0.23886	0.42906	0.999946	721	2	0.15273\	2.06576
NTC_new_316	6	0.32373	0.53238	0.999997	974	2	0.14157	0.24089	0.43169	0.999946	724	3	0.14157\	2.05355
NTC_new_84	6	0.94033	0.94115	0.999997	1741	0	0.069984	0.24089	0.43169	0.999946	722	3	0.069984\	2.05355
NTC_new_939	6	0.38568	0.57512	0.999997	1050	2	0.1404	0.24089	0.43169	0.999946	723	3	0.1404\	2.05355
INO80B	6	0.40123	0.58656	0.999997	1068	2	0.030451	0.24092	0.43173	0.999946	725	2	0.030451\	2.05337
KMT2C	6	0.044361	0.12866	0.919251	270	3	-0.072402	0.24132	0.43225	0.999946	726	2	-0.072402\	2.05098
HIST1H2AL	6	0.23804	0.42768	0.999997	801	2	-0.03144	0.24193	0.43299	0.999946	727	2	-0.03144\	2.04734
FBL	6	0.040573	0.11997	0.908443	251	3	-0.072056	0.24234	0.43348	0.999946	728	2	-0.072056\	2.0449
HIST1H2AB	6	0.015144	0.056429	0.749784	145	2	-0.10451	0.24255	0.43381	0.999946	729	2	-0.10451\	2.04365
TAF1L	6	0.67673	0.78625	0.999997	1425	1	-0.043665	0.24297	0.4344	0.999946	730	2	-0.043665\	2.04115
GSE1	6	0.11175	0.26285	0.970136	524	3	0.040455	0.24309	0.43456	0.999946	731	3	0.040455\	2.04044
MEAF6	6	0.12884	0.2853	0.979157	563	3	-0.044747	0.24379	0.43554	0.999946	732	2	-0.044747\	2.03629
HIST1H3C	6	0.72835	0.80468	0.999997	1456	1	0.083215	0.24528	0.43751	0.999946	733	3	0.083215\	2.0275
YAF2	6	0.48779	0.65014	0.999997	1185	2	0.076666	0.24654	0.43906	0.999946	734	3	0.076666\	2.02011
NTC_new_103	6	0.86464	0.87397	0.999997	1614	1	0.11815	0.24836	0.44124	0.999946	738	3	0.11815\	2.0095
NTC_new_15	6	0.26563	0.46239	0.999997	863	2	0.1331	0.24836	0.44124	0.999946	736	3	0.1331\	2.0095
NTC_new_490	6	0.19052	0.36751	0.999997	692	3	-0.014454	0.24836	0.44124	0.999946	735	3	-0.014454\	2.0095
NTC_new_671	6	0.82759	0.851	0.999997	1560	1	0.14599	0.24836	0.44124	0.999946	737	3	0.14599\	2.0095
NTC_new_391	6	0.33654	0.5411	0.999997	991	2	-0.12386	0.24933	0.4425	0.999946	739	2	-0.12386\	2.00387
NTC_new_764	6	0.44325	0.61649	0.999997	1130	2	0.024316	0.24933	0.4425	0.999946	740	3	0.024316\	2.00387
NTC_new_889	6	0.35624	0.5542	0.999997	1010	1	0.045038	0.24933	0.4425	0.999946	741	2	0.045038\	2.00387
BCOR	6	0.97245	0.97254	0.999997	1814	0	0.16675	0.24991	0.44314	0.999946	742	3	0.16675\	2.00052
SMNDC1	6	0.57624	0.71792	0.999997	1302	1	0.10039	0.25002	0.44328	0.999946	743	3	0.10039\	1.99988
DNMT3A	6	0.97402	0.97401	0.999997	1816	0	0.11179	0.25154	0.44526	0.999946	744	2	0.11179\	1.99114
HMGN1	6	0.4591	0.62836	0.999997	1149	2	-0.044951	0.2524	0.44631	0.999946	745	3	-0.044951\	1.98622
HIST1H3A	6	0.10181	0.24937	0.960768	497	2	0.015197	0.25316	0.44725	0.999946	746	2	0.015197\	1.98188
HIST1H2AA	6	0.57335	0.71581	0.999997	1294	2	0.046251	0.25335	0.44752	0.999946	747	3	0.046251\	1.9808
CDK17	6	0.13876	0.29888	0.986177	586	3	-0.086193	0.25346	0.4477	0.999946	748	2	-0.086193\	1.98017
TDRD5	6	0.1847	0.35969	0.999997	674	3	-0.18031	0.25397	0.44833	0.999946	749	2	-0.18031\	1.97727
RPS6KA4	6	0.18314	0.35789	0.999997	672	3	-0.21346	0.25437	0.44886	0.999946	750	2	-0.21346\	1.975
POLE3	6	0.092495	0.23108	0.938947	464	2	0.079781	0.25518	0.44973	0.999946	751	2	0.079781\	1.97041
CIT	6	0.62523	0.75642	0.999997	1369	1	0.095165	0.25526	0.4498	0.999946	752	3	0.095165\	1.96996
TDG	6	0.93053	0.93135	0.999997	1728	0	0.067733	0.25542	0.45003	0.999946	753	3	0.067733\	1.96906
DNAJC1	6	0.36974	0.56387	0.999997	1034	2	-0.045447	0.25552	0.45011	0.999946	754	2	-0.045447\	1.96849
ATR	6	0.80296	0.83758	0.999997	1534	1	0.19523	0.25606	0.45077	0.999946	755	3	0.19523\	1.96545
FBRSL1	6	0.11473	0.26708	0.970216	530	3	-0.11367	0.25676	0.45176	0.999946	756	2	-0.11367\	1.96151
CDK7	6	0.7287	0.80481	0.999997	1457	1	-0.083894	0.2568	0.4518	0.999946	757	2	-0.083894\	1.96128
PCNA	6	0.94809	0.94878	0.999997	1750	0	0.24702	0.25686	0.45186	0.999946	758	3	0.24702\	1.96095
NTC_new_1077	6	0.16308	0.33179	0.999997	630	3	-0.17517	0.25894	0.45448	0.999946	760	2	-0.17517\	1.94931
NTC_new_386	6	0.26563	0.46239	0.999997	862	1	0.0054871	0.25894	0.45448	0.999946	761	2	0.0054871\	1.94931
NTC_new_472	6	0.084092	0.21385	0.938947	436	4	-0.20187	0.25894	0.45448	0.999946	759	2	-0.20187\	1.94931
NTC_new_617	6	0.10584	0.25458	0.960768	501	3	-0.0872	0.25894	0.45448	0.999946	764	2	-0.0872\	1.94931
NTC_new_694	6	0.17266	0.34419	0.999997	655	2	0.076229	0.25894	0.45448	0.999946	763	2	0.076229\	1.94931
NTC_new_915	6	0.23004	0.41773	0.999997	784	3	-0.030238	0.25894	0.45448	0.999946	762	3	-0.030238\	1.94931
HMGN5	6	0.91161	0.91242	0.999997	1687	1	0.066207	0.25957	0.45523	0.999946	765	3	0.066207\	1.9458
ANKRD32	6	0.95774	0.95804	0.999997	1781	0	0.17032	0.26038	0.4562	0.999946	766	3	0.17032\	1.94131
H2BFM	6	0.2096	0.39167	0.999997	733	2	0.052014	0.26082	0.4567	0.999946	767	2	0.052014\	1.93887
ZNF711	6	0.19592	0.3741	0.999997	700	2	0.036086	0.26174	0.45788	0.999946	768	2	0.036086\	1.93379
HIST1H4H	6	0.69885	0.79394	0.999997	1438	1	-0.027612	0.26257	0.45879	0.999946	769	2	-0.027612\	1.92923
NTC_new_1075	6	0.35833	0.55577	0.999997	1019	2	0.058234	0.26287	0.45916	0.999946	774	3	0.058234\	1.92758
NTC_new_218	6	0.22096	0.40602	0.999997	758	3	-0.02008	0.26287	0.45916	0.999946	775	3	-0.02008\	1.92758
NTC_new_291	6	0.097688	0.24155	0.96002	486	3	-0.056551	0.26287	0.45916	0.999946	773	3	-0.056551\	1.92758
NTC_new_622	6	0.46737	0.63478	0.999997	1159	1	0.07562	0.26287	0.45916	0.999946	771	3	0.07562\	1.92758
NTC_new_765	6	0.86159	0.8718	0.999997	1611	1	0.11392	0.26287	0.45916	0.999946	772	3	0.11392\	1.92758
NTC_new_989	6	0.23528	0.4243	0.999997	799	2	0.074271	0.26287	0.45916	0.999946	770	3	0.074271\	1.92758
SF3B3	6	0.30582	0.51151	0.999997	947	2	0.25734	0.26537	0.46236	0.999946	776	3	0.25734\	1.91392
NTC_new_409	6	0.85355	0.86636	0.999997	1596	1	0.091581	0.26631	0.46347	0.999946	780	2	0.091581\	1.90882
NTC_new_702	6	0.18574	0.3611	0.999997	678	2	0.073059	0.26631	0.46347	0.999946	778	2	0.073059\	1.90882
NTC_new_753	6	0.012631	0.047613	0.723303	124	3	-0.20495	0.26631	0.46347	0.999946	779	2	-0.20495\	1.90882
NTC_new_768	6	0.17266	0.34419	0.999997	653	2	-0.036273	0.26631	0.46347	0.999946	781	2	-0.036273\	1.90882
NTC_new_855	6	0.79578	0.83385	0.999997	1526	1	0.13207	0.26631	0.46347	0.999946	777	3	0.13207\	1.90882
NTC_new_202	6	0.10817	0.25783	0.960768	510	2	-0.069773	0.26782	0.4654	0.999946	787	1	-0.069773\	1.90066
NTC_new_222	6	0.08237	0.21019	0.938947	430	3	-0.041797	0.26782	0.4654	0.999946	786	2	-0.041797\	1.90066
NTC_new_522	6	0.010032	0.038772	0.71227	98	4	-0.17345	0.26782	0.4654	0.999946	783	2	-0.17345\	1.90066
NTC_new_596	6	0.00070689	0.0035708	0.354703	18	5	-0.46295	0.26782	0.4654	0.999946	784	1	-0.46295\	1.90066
NTC_new_720	6	0.43102	0.6076	0.999997	1112	2	0.0011901	0.26782	0.4654	0.999946	782	2	0.0011901\	1.90066
NTC_new_767	6	0.17985	0.35372	0.999997	667	3	-0.17154	0.26782	0.4654	0.999946	789	2	-0.17154\	1.90066
NTC_new_82	6	0.27026	0.46822	0.999997	874	2	-0.0055018	0.26782	0.4654	0.999946	790	2	-0.0055018\	1.90066
NTC_new_86	6	0.67964	0.78728	0.999997	1427	1	0.090235	0.26782	0.4654	0.999946	788	2	0.090235\	1.90066
NTC_new_87	6	0.18574	0.3611	0.999997	679	1	0.061897	0.26782	0.4654	0.999946	785	2	0.061897\	1.90066
NTC_new_296	6	0.84842	0.86308	0.999997	1588	1	0.041758	0.26787	0.46542	0.999946	793	3	0.041758\	1.9004
NTC_new_353	6	0.055253	0.15307	0.926106	315	3	0.0051593	0.26787	0.46542	0.999946	791	3	0.0051593\	1.9004
NTC_new_470	6	0.95955	0.95992	0.999997	1784	0	0.12326	0.26787	0.46542	0.999946	792	3	0.12326\	1.9004
NTC_new_584	6	0.52758	0.68055	0.999997	1231	1	0.10159	0.26787	0.46542	0.999946	795	3	0.10159\	1.9004
NTC_new_899	6	0.35624	0.5542	0.999997	1009	2	0.042705	0.26787	0.46542	0.999946	794	3	0.042705\	1.9004
NTC_new_1079	6	0.25573	0.45008	0.999997	834	2	0.11856	0.27185	0.47031	0.999946	798	3	0.11856\	1.87912
NTC_new_18	6	0.35833	0.55577	0.999997	1020	2	0.076887	0.27185	0.47031	0.999946	800	3	0.076887\	1.87912
NTC_new_372	6	0.0043494	0.018376	0.58871	59	3	-0.13785	0.27185	0.47031	0.999946	799	3	-0.13785\	1.87912
NTC_new_4	6	0.9612	0.96143	0.999997	1791	0	0.076967	0.27185	0.47031	0.999946	797	3	0.076967\	1.87912
NTC_new_598	6	0.35624	0.5542	0.999997	1012	1	0.090718	0.27185	0.47031	0.999946	796	3	0.090718\	1.87912
PRKAG2	6	0.89322	0.89575	0.999997	1650	1	0.11089	0.27255	0.47119	0.999946	801	2	0.11089\	1.87541
POLR2D	6	0.85182	0.86524	0.999997	1591	1	0.047562	0.27276	0.47146	0.999946	802	2	0.047562\	1.8743
NSD1	6	0.77709	0.82503	0.999997	1506	1	0.10675	0.27461	0.47394	0.999946	803	3	0.10675\	1.86454
NAP1L4	6	0.43027	0.60701	0.999997	1105	2	0.12317	0.27559	0.4751	0.999946	804	3	0.12317\	1.8594
HDAC1	6	0.5094	0.66685	0.999997	1206	2	0.071054	0.27576	0.47529	0.999946	805	3	0.071054\	1.85851
HIST1H2BJ	6	0.12844	0.28477	0.979157	561	2	0.1112	0.27595	0.47555	0.999946	806	3	0.1112\	1.85752
TET1	6	0.0012908	0.006453	0.394338	29	2	0.13589	0.27608	0.47573	0.999946	807	3	0.13589\	1.85684
ELP3	6	0.91357	0.91412	0.999997	1698	0	0.17263	0.2769	0.47672	0.999946	808	3	0.17263\	1.85256
MASTL	6	0.93047	0.93128	0.999997	1727	0	0.03974	0.27713	0.47701	0.999946	809	1	0.03974\	1.85137
SUPT7L	6	0.15905	0.32643	0.999997	622	1	-0.012017	0.27753	0.47753	0.999946	810	2	-0.012017\	1.84928
BAZ2A	6	0.55299	0.70004	0.999997	1263	2	-0.0502	0.27832	0.47843	0.999946	811	1	-0.0502\	1.84518
NTC_new_379	6	0.66455	0.78255	0.999997	1421	1	0.11689	0.27854	0.47866	0.999946	812	3	0.11689\	1.84404
NTC_new_38	6	0.70141	0.79486	0.999997	1440	1	0.068051	0.27854	0.47866	0.999946	813	3	0.068051\	1.84404
NTC_new_844	6	0.44954	0.62127	0.999997	1136	2	0.023953	0.27854	0.47866	0.999946	815	3	0.023953\	1.84404
NTC_new_850	6	0.25437	0.44852	0.999997	831	1	0.068051	0.27854	0.47866	0.999946	814	3	0.068051\	1.84404
NTC_new_546	6	0.56279	0.70761	0.999997	1277	2	0.018889	0.27924	0.47948	0.999946	816	3	0.018889\	1.84042
NTC_new_338	6	0.94716	0.94791	0.999997	1747	0	0.072857	0.28248	0.48335	0.999946	820	3	0.072857\	1.82378
NTC_new_667	6	0.87058	0.8783	0.999997	1621	1	0.072541	0.28248	0.48335	0.999946	818	3	0.072541\	1.82378
NTC_new_894	6	0.86159	0.8718	0.999997	1610	1	0.066151	0.28248	0.48335	0.999946	819	3	0.066151\	1.82378
NTC_new_923	6	0.018397	0.066678	0.780359	162	3	-0.15257	0.28248	0.48335	0.999946	817	3	-0.15257\	1.82378
BRE	6	0.37186	0.56537	0.999997	1038	2	0.0038633	0.28528	0.4867	0.999946	821	3	0.0038633\	1.80955
NTC_new_1013	6	0.062045	0.16763	0.926543	341	2	-0.00079996	0.28625	0.4879	0.999946	822	2	-0.00079996\	1.80465
NTC_new_1090	6	0.20911	0.39093	0.999997	729	3	-0.099932	0.28625	0.4879	0.999946	826	2	-0.099932\	1.80465
NTC_new_529	6	0.15662	0.32322	0.999997	619	2	0.089263	0.28625	0.4879	0.999946	825	2	0.089263\	1.80465
NTC_new_588	6	0.034118	0.10501	0.846184	234	2	-0.036424	0.28625	0.4879	0.999946	823	2	-0.036424\	1.80465
NTC_new_647	6	0.028345	0.091052	0.846184	203	4	-0.24214	0.28625	0.4879	0.999946	824	2	-0.24214\	1.80465
NTC_new_1078	6	0.15862	0.32588	0.999997	621	3	-0.055595	0.28867	0.49069	0.999946	834	3	-0.055595\	1.79251
NTC_new_237	6	0.98749	0.98754	0.999997	1855	0	0.1092	0.28867	0.49069	0.999946	832	3	0.1092\	1.79251
NTC_new_636	6	0.1429	0.30433	0.987549	596	3	-0.054867	0.28867	0.49069	0.999946	833	3	-0.054867\	1.79251
NTC_new_746	6	0.018533	0.06698	0.780359	165	2	0.1072	0.28867	0.49069	0.999946	829	3	0.1072\	1.79251
NTC_new_805	6	0.15662	0.32322	0.999997	618	3	-0.029142	0.28867	0.49069	0.999946	831	3	-0.029142\	1.79251
NTC_new_833	6	0.12194	0.27642	0.970216	551	3	-0.0044255	0.28867	0.49069	0.999946	827	3	-0.0044255\	1.79251
NTC_new_931	6	0.44954	0.62127	0.999997	1135	2	0.1092	0.28867	0.49069	0.999946	830	3	0.1092\	1.79251
NTC_new_935	6	0.20058	0.38002	0.999997	710	2	0.10052	0.28867	0.49069	0.999946	828	3	0.10052\	1.79251
SS18L2	6	0.99629	0.99638	0.999997	1882	0	0.20137	0.28908	0.49123	0.999946	835	2	0.20137\	1.79046
PRPF31	6	0.13789	0.29767	0.985775	574	3	-0.20409	0.29043	0.49275	0.999946	836	1	-0.20409\	1.78374
PSIP1	6	0.60685	0.74207	0.999997	1347	1	0.15221	0.29223	0.49483	0.999946	837	3	0.15221\	1.77482
UBE2D1	6	0.64767	0.77502	0.999997	1409	2	0.060917	0.29257	0.49517	0.999946	838	3	0.060917\	1.77315
NTC_new_163	6	0.32373	0.53238	0.999997	976	1	0.090638	0.29275	0.49542	0.999946	840	3	0.090638\	1.77226
NTC_new_39	6	0.066773	0.17774	0.926543	366	3	-0.17691	0.29275	0.49542	0.999946	843	2	-0.17691\	1.77226
NTC_new_462	6	0.10817	0.25783	0.960768	514	2	0.011138	0.29275	0.49542	0.999946	841	2	0.011138\	1.77226
NTC_new_521	6	0.73131	0.8058	0.999997	1459	1	-0.0044697	0.29275	0.49542	0.999946	842	2	-0.0044697\	1.77226
NTC_new_654	6	0.59581	0.73331	0.999997	1324	2	0.051599	0.29275	0.49542	0.999946	839	2	0.051599\	1.77226
NTC_new_807	6	0.046065	0.13269	0.926106	274	2	0.018771	0.29275	0.49542	0.999946	845	2	0.018771\	1.77226
NTC_new_903	6	0.92462	0.92533	0.999997	1716	0	0.023197	0.29275	0.49542	0.999946	844	2	0.023197\	1.77226
ELP2	6	0.9448	0.9456	0.999997	1746	0	-0.070531	0.29276	0.49542	0.999946	846	1	-0.070531\	1.77221
PHF14	6	0.97375	0.97371	0.999997	1815	0	0.12339	0.29306	0.49574	0.999946	847	3	0.12339\	1.77073
DNAJC2	6	0.3192	0.52794	0.999997	971	2	0.13452	0.2939	0.4967	0.999946	848	3	0.13452\	1.7666
ASXL1	6	0.62454	0.75587	0.999997	1368	1	0.15259	0.29423	0.49709	0.999946	849	3	0.15259\	1.76498
HIST1H2AJ	6	0.89298	0.89558	0.999997	1648	1	0.13606	0.29431	0.4972	0.999946	850	2	0.13606\	1.76459
UBE2E1	6	0.89599	0.89798	0.999997	1656	1	0.074545	0.29473	0.49774	0.999946	851	3	0.074545\	1.76253
CBX3	6	0.64003	0.76857	0.999997	1391	1	0.10866	0.29589	0.49923	0.999946	852	3	0.10866\	1.75687
NTC_new_1043	6	0.32373	0.53238	0.999997	984	1	0.082939	0.2989	0.50274	0.999946	856	3	0.082939\	1.74227
NTC_new_151	6	0.79578	0.83385	0.999997	1524	1	0.067553	0.2989	0.50274	0.999946	854	3	0.067553\	1.74227
NTC_new_365	6	0.55968	0.7052	0.999997	1273	1	0.071758	0.2989	0.50274	0.999946	855	3	0.071758\	1.74227
NTC_new_788	6	0.49663	0.6569	0.999997	1191	2	0.096295	0.2989	0.50274	0.999946	853	3	0.096295\	1.74227
NTC_new_377	6	0.26563	0.46239	0.999997	856	1	0.053139	0.2998	0.50395	0.999946	857	2	0.053139\	1.73793
NTC_new_982	6	0.25437	0.44852	0.999997	832	1	-0.011865	0.2998	0.50395	0.999946	858	2	-0.011865\	1.73793
EID2	6	0.19419	0.37198	0.999997	698	2	-0.069965	0.30123	0.50574	0.999946	859	1	-0.069965\	1.73106
AKAP1	6	0.31642	0.52446	0.999997	965	3	0.0060583	0.30174	0.50656	0.999946	860	3	0.0060583\	1.72862
FOXP2	6	0.74334	0.81064	0.999997	1466	1	0.11129	0.30241	0.5074	0.999946	861	3	0.11129\	1.72542
TADA3	6	0.080264	0.206	0.938947	423	3	-0.017696	0.30258	0.50762	0.999946	862	3	-0.017696\	1.72461
NAP1L2	6	0.20431	0.38495	0.999997	720	3	-0.096241	0.30315	0.50829	0.999946	863	1	-0.096241\	1.7219
STK31	6	0.98169	0.9816	0.999997	1837	0	0.10665	0.30325	0.50846	0.999946	864	3	0.10665\	1.72142
H2AFY2	6	0.013724	0.05132	0.723303	136	4	-0.19833	0.3038	0.50902	0.999946	865	2	-0.19833\	1.71881
HJURP	6	0.98955	0.98957	0.999997	1862	0	0.135	0.3046	0.51004	0.999946	866	3	0.135\	1.71501
DEK	6	0.53203	0.68383	0.999997	1236	2	-0.03393	0.30506	0.51064	0.999946	867	2	-0.03393\	1.71284
PRKAG1	6	0.28875	0.49064	0.999997	907	3	-0.077057	0.30633	0.51223	0.999946	868	2	-0.077057\	1.70684
PRKAG3	6	0.94245	0.9433	0.999997	1743	0	0.1117	0.30695	0.51306	0.999946	869	3	0.1117\	1.70392
CDK3	6	0.98265	0.98263	0.999997	1844	0	0.14893	0.30729	0.51348	0.999946	870	3	0.14893\	1.70233
CHUK	6	0.0024397	0.011142	0.490852	42	4	-0.50287	0.30772	0.51406	0.999946	871	1	-0.50287\	1.70031
HR	6	0.19614	0.37433	0.999997	701	3	-0.10037	0.31038	0.5173	0.999946	872	1	-0.10037\	1.68789
NTC_new_366	6	0.090518	0.22691	0.938947	459	3	-0.12249	0.31041	0.51731	0.999946	873	3	-0.12249\	1.68775
UHRF2	6	0.54394	0.69304	0.999997	1252	2	-0.054029	0.31096	0.51792	0.999946	874	2	-0.054029\	1.6852
ACTR3B	6	0.9423	0.94316	0.999997	1742	0	0.061982	0.31114	0.51816	0.999946	875	2	0.061982\	1.68436
PCGF5	6	0.046349	0.13328	0.926106	276	3	-0.11531	0.31227	0.51939	0.999946	876	2	-0.11531\	1.67913
LBR	6	0.94857	0.94933	0.999997	1753	0	0.14492	0.3132	0.52062	0.999946	877	3	0.14492\	1.67484
JMJD6	6	0.070786	0.18644	0.938947	381	3	-0.063201	0.31354	0.52101	0.999946	878	3	-0.063201\	1.67328
HMGA2	6	0.50801	0.66579	0.999997	1204	2	0.055326	0.31413	0.52185	0.999946	879	2	0.055326\	1.67057
SIRT7	6	0.046846	0.13455	0.926106	279	1	0.11872	0.31557	0.52349	0.999946	880	3	0.11872\	1.66397
NCL	6	0.57185	0.71451	0.999997	1293	2	0.091633	0.31603	0.52403	0.999946	881	2	0.091633\	1.66187
GADD45B	6	0.095032	0.23613	0.945483	483	3	-0.05693	0.31899	0.52773	0.999946	882	2	-0.05693\	1.64842
NTC_new_271	6	0.25573	0.45008	0.999997	835	2	0.109	0.31913	0.52791	0.999946	884	3	0.109\	1.64778
NTC_new_487	6	0.50589	0.66418	0.999997	1198	1	0.049934	0.31913	0.52791	0.999946	883	3	0.049934\	1.64778
NTC_new_733	6	0.77404	0.82356	0.999997	1505	1	0.092093	0.31913	0.52791	0.999946	887	3	0.092093\	1.64778
NTC_new_772	6	0.27733	0.47709	0.999997	890	2	0.017044	0.31913	0.52791	0.999946	886	3	0.017044\	1.64778
NTC_new_847	6	0.066773	0.17774	0.926543	368	3	-0.048245	0.31913	0.52791	0.999946	885	3	-0.048245\	1.64778
NTC_new_1022	6	0.088889	0.22357	0.938947	454	4	-0.12538	0.32055	0.5294	0.999946	894	1	-0.12538\	1.64138
NTC_new_1089	6	0.017258	0.063407	0.772557	158	4	-0.39566	0.32055	0.5294	0.999946	893	1	-0.39566\	1.64138
NTC_new_227	6	0.28627	0.48778	0.999997	901	3	-0.13512	0.32055	0.5294	0.999946	896	2	-0.13512\	1.64138
NTC_new_256	6	0.81618	0.84456	0.999997	1550	1	0.088065	0.32055	0.5294	0.999946	895	1	0.088065\	1.64138
NTC_new_344	6	0.081259	0.20812	0.938947	426	4	-0.16945	0.32055	0.5294	0.999946	892	1	-0.16945\	1.64138
NTC_new_412	6	0.80455	0.83837	0.999997	1536	1	-0.064633	0.32055	0.5294	0.999946	889	1	-0.064633\	1.64138
NTC_new_440	6	0.45644	0.62629	0.999997	1145	2	-0.031148	0.32055	0.5294	0.999946	888	2	-0.031148\	1.64138
NTC_new_533	6	0.13827	0.29818	0.985775	585	2	-0.012067	0.32055	0.5294	0.999946	891	2	-0.012067\	1.64138
NTC_new_701	6	0.09304	0.23207	0.938947	475	4	-0.16347	0.32055	0.5294	0.999946	890	1	-0.16347\	1.64138
NTC_new_709	6	0.26714	0.46426	0.999997	870	3	-0.04211	0.32055	0.5294	0.999946	900	1	-0.04211\	1.64138
NTC_new_890	6	0.62656	0.75742	0.999997	1370	2	-0.062221	0.32055	0.5294	0.999946	901	1	-0.062221\	1.64138
NTC_new_900	6	0.073255	0.1916	0.938947	393	3	-0.21211	0.32055	0.5294	0.999946	899	1	-0.21211\	1.64138
NTC_new_921	6	0.23521	0.42424	0.999997	789	3	-0.14341	0.32055	0.5294	0.999946	897	1	-0.14341\	1.64138
NTC_new_964	6	0.44325	0.61649	0.999997	1131	2	-0.013294	0.32055	0.5294	0.999946	898	2	-0.013294\	1.64138
WHSC1	6	0.95075	0.95153	0.999997	1759	0	0.10485	0.3211	0.53004	0.999946	902	2	0.10485\	1.63891
YEATS2	6	0.95465	0.95499	0.999997	1770	0	0.14303	0.32186	0.53083	0.999946	903	3	0.14303\	1.63549
YWHAE	6	0.43317	0.60923	0.999997	1117	1	0.19197	0.32271	0.53173	0.999946	904	3	0.19197\	1.63169
APOBEC3H	6	0.74583	0.81172	0.999997	1472	1	0.10996	0.32356	0.53273	0.999946	905	3	0.10996\	1.62789
PHRF1	6	0.70563	0.79634	0.999997	1443	1	0.12874	0.32595	0.53564	0.999946	906	3	0.12874\	1.61728
DDB2	6	0.93086	0.93168	0.999997	1729	0	0.030676	0.32689	0.53664	0.999946	907	1	0.030676\	1.61312
NTC_new_1047	6	0.034118	0.10501	0.846184	231	2	0.034028	0.32808	0.53734	0.999946	911	2	0.034028\	1.60788
NTC_new_375	6	0.25437	0.44852	0.999997	828	2	0.044678	0.32808	0.53734	0.999946	909	2	0.044678\	1.60788
NTC_new_50	6	0.41919	0.59937	0.999997	1091	1	0.048783	0.32808	0.53734	0.999946	908	2	0.048783\	1.60788
NTC_new_707	6	0.20196	0.3818	0.999997	712	3	-0.12118	0.32808	0.53734	0.999946	910	2	-0.12118\	1.60788
RUVBL1	6	0.75795	0.81657	0.999997	1489	1	0.23843	0.32838	0.53751	0.999946	912	2	0.23843\	1.60656
TDRD6	6	0.97735	0.97737	0.999997	1830	0	0.052178	0.33097	0.53916	0.999946	913	2	0.052178\	1.59523
DOT1L	6	0.066536	0.17717	0.926543	355	2	-0.038562	0.33134	0.53945	0.999946	914	2	-0.038562\	1.59362
PHF10	6	0.28927	0.49125	0.999997	909	2	-0.040173	0.33167	0.53965	0.999946	915	2	-0.040173\	1.59218
TDRD10	6	0.051058	0.1441	0.926106	292	4	-0.18175	0.33392	0.54134	0.999946	916	2	-0.18175\	1.58243
PYGO1	6	0.53254	0.68419	0.999997	1237	1	0.094818	0.334	0.5414	0.999946	917	2	0.094818\	1.58208
NTC_new_343	6	0.046065	0.13269	0.926106	275	2	0.02342	0.3407	0.54574	0.999946	918	2	0.02342\	1.55343
NTC_new_465	6	0.66455	0.78255	0.999997	1422	1	0.1064	0.3407	0.54574	0.999946	919	2	0.1064\	1.55343
NTC_new_467	6	0.055253	0.15307	0.926106	309	3	-0.10309	0.3407	0.54574	0.999946	922	2	-0.10309\	1.55343
NTC_new_830	6	0.066773	0.17774	0.926543	369	2	-0.0066438	0.3407	0.54574	0.999946	921	2	-0.0066438\	1.55343
NTC_new_90	6	0.13827	0.29818	0.985775	580	2	-0.00017838	0.3407	0.54574	0.999946	920	1	-0.00017838\	1.55343
NTC_new_22	6	0.080105	0.20564	0.938947	419	2	-0.016619	0.34087	0.54581	0.999946	926	2	-0.016619\	1.55271
NTC_new_230	6	0.29173	0.49402	0.999997	918	3	-0.021736	0.34087	0.54581	0.999946	924	2	-0.021736\	1.55271
NTC_new_503	6	0.91743	0.91797	0.999997	1707	0	0.10511	0.34087	0.54581	0.999946	925	2	0.10511\	1.55271
NTC_new_643	6	0.25573	0.45008	0.999997	836	2	-0.07989	0.34087	0.54581	0.999946	923	2	-0.07989\	1.55271
NTC_new_853	6	0.53704	0.68791	0.999997	1241	2	0.063702	0.34087	0.54581	0.999946	927	2	0.063702\	1.55271
KDM5D	6	0.36426	0.56007	0.999997	1028	2	0.04692	0.34521	0.54869	0.999946	928	2	0.04692\	1.53445
PRKCA	6	0.45875	0.62805	0.999997	1148	2	-0.064811	0.34779	0.55051	0.999946	929	1	-0.064811\	1.52371
NTC_new_169	6	0.93284	0.93373	0.999997	1735	0	0.083571	0.34881	0.55119	0.999946	931	2	0.083571\	1.51949
NTC_new_254	6	0.09487	0.23581	0.945483	480	3	-0.15268	0.34881	0.55119	0.999946	934	2	-0.15268\	1.51949
NTC_new_33	6	0.9225	0.92316	0.999997	1711	0	0.028935	0.34881	0.55119	0.999946	930	2	0.028935\	1.51949
NTC_new_752	6	0.078516	0.20248	0.938947	408	3	-0.20556	0.34881	0.55119	0.999946	933	2	-0.20556\	1.51949
NTC_new_911	6	0.93788	0.93875	0.999997	1739	0	-0.063146	0.34881	0.55119	0.999946	932	2	-0.063146\	1.51949
FOXP3	6	0.213	0.39581	0.999997	738	2	0.046108	0.35325	0.55403	0.999946	935	2	0.046108\	1.50124
NTC_new_27	6	0.17575	0.34824	0.999997	662	3	-0.16433	0.35589	0.5559	0.999946	940	1	-0.16433\	1.4905
NTC_new_278	6	0.27733	0.47709	0.999997	884	2	-0.11846	0.35589	0.5559	0.999946	941	1	-0.11846\	1.4905
NTC_new_557	6	0.93284	0.93373	0.999997	1733	0	0.050695	0.35589	0.5559	0.999946	942	2	0.050695\	1.4905
NTC_new_593	6	0.60011	0.73668	0.999997	1337	2	-0.13348	0.35589	0.5559	0.999946	939	1	-0.13348\	1.4905
NTC_new_620	6	0.16374	0.33263	0.999997	632	2	-0.081021	0.35589	0.5559	0.999946	936	1	-0.081021\	1.4905
NTC_new_648	6	0.45315	0.62398	0.999997	1137	2	-0.011487	0.35589	0.5559	0.999946	938	1	-0.011487\	1.4905
NTC_new_660	6	0.012139	0.045745	0.723303	121	4	-0.27807	0.35589	0.5559	0.999946	937	1	-0.27807\	1.4905
NTC_new_734	6	0.95827	0.95854	0.999997	1782	0	0.062641	0.35589	0.5559	0.999946	945	2	0.062641\	1.4905
NTC_new_736	6	0.068362	0.18121	0.931126	375	3	-0.21379	0.35589	0.5559	0.999946	943	1	-0.21379\	1.4905
NTC_new_973	6	0.81968	0.84648	0.999997	1551	1	0.040626	0.35589	0.5559	0.999946	944	1	0.040626\	1.4905
NTC_new_1007	6	0.60316	0.73914	0.999997	1341	1	0.068543	0.35759	0.55709	0.999946	947	2	0.068543\	1.48362
NTC_new_515	6	0.18574	0.3611	0.999997	675	3	-0.053684	0.35759	0.55709	0.999946	946	2	-0.053684\	1.48362
SMYD4	6	0.25893	0.45416	0.999997	841	3	-0.16333	0.36298	0.56099	0.999946	948	2	-0.16333\	1.46204
YY1	6	0.59665	0.73404	0.999997	1330	2	0.057739	0.36319	0.56116	0.999946	949	2	0.057739\	1.4612
CUL1	6	0.41099	0.59343	0.999997	1080	2	-0.012058	0.36404	0.56175	0.999946	950	2	-0.012058\	1.45783
BRCC3	6	0.14729	0.31061	0.999997	597	2	0.011072	0.36552	0.56267	0.999946	951	2	0.011072\	1.45198
HINFP	6	0.22339	0.40911	0.999997	762	2	0.08246	0.37096	0.56656	0.999946	952	2	0.08246\	1.43066
NTC_new_1023	6	0.18574	0.3611	0.999997	683	1	0.073887	0.37143	0.56688	0.999946	955	2	0.073887\	1.42884
NTC_new_1058	6	0.056248	0.15515	0.926106	317	4	-0.22956	0.37143	0.56688	0.999946	956	2	-0.22956\	1.42884
NTC_new_454	6	0.23004	0.41773	0.999997	781	3	-0.077615	0.37143	0.56688	0.999946	957	2	-0.077615\	1.42884
NTC_new_560	6	0.059321	0.16158	0.926543	331	3	-0.18275	0.37143	0.56688	0.999946	953	2	-0.18275\	1.42884
NTC_new_58	6	0.022077	0.075596	0.835446	175	3	-0.068419	0.37143	0.56688	0.999946	954	2	-0.068419\	1.42884
NTC_new_787	6	0.008429	0.033223	0.71227	83	3	-0.19504	0.37143	0.56688	0.999946	958	2	-0.19504\	1.42884
SCML2	6	0.16068	0.32863	0.999997	623	3	-0.1589	0.37629	0.57004	0.999946	959	2	-0.1589\	1.41008
ZMYM3	6	0.23204	0.42022	0.999997	787	3	-0.084556	0.37671	0.57031	0.999946	960	2	-0.084556\	1.40847
TLE4	6	0.76313	0.81878	0.999997	1494	1	0.01533	0.37899	0.57193	0.999946	961	1	0.01533\	1.39977
ATAD2	6	0.9535	0.9539	0.999997	1765	0	0.0027969	0.37933	0.57217	0.999946	962	2	0.0027969\	1.39847
SAP130	6	0.89916	0.90104	0.999997	1659	1	-0.091346	0.38038	0.57301	0.999946	963	1	-0.091346\	1.39449
NTC_new_183	6	0.44325	0.61649	0.999997	1129	2	-0.042668	0.38251	0.57459	0.999946	964	2	-0.042668\	1.38643
NTC_new_594	6	0.026946	0.08778	0.846184	196	3	-0.16947	0.38251	0.57459	0.999946	966	2	-0.16947\	1.38643
NTC_new_922	6	0.14228	0.30356	0.987549	590	2	0.0061768	0.38251	0.57459	0.999946	965	2	0.0061768\	1.38643
CDK5	6	0.128	0.2842	0.979157	560	3	-0.15593	0.38599	0.57705	0.999946	967	2	-0.15593\	1.37336
HIST1H4I	6	0.60933	0.74407	0.999997	1351	2	0.062407	0.38747	0.57812	0.999946	968	2	0.062407\	1.36784
NTC_new_1038	6	0.43787	0.6128	0.999997	1120	2	-0.059341	0.39002	0.58002	0.999946	971	1	-0.059341\	1.35838
NTC_new_187	6	0.6403	0.76881	0.999997	1397	2	0.029177	0.39002	0.58002	0.999946	973	2	0.029177\	1.35838
NTC_new_320	6	0.080105	0.20564	0.938947	411	2	-0.0097778	0.39002	0.58002	0.999946	970	2	-0.0097778\	1.35838
NTC_new_332	6	0.55968	0.7052	0.999997	1271	1	-0.069949	0.39002	0.58002	0.999946	976	2	-0.069949\	1.35838
NTC_new_388	6	0.58025	0.72096	0.999997	1305	2	-0.079375	0.39002	0.58002	0.999946	980	1	-0.079375\	1.35838
NTC_new_723	6	0.63416	0.76372	0.999997	1382	2	-0.13342	0.39002	0.58002	0.999946	979	1	-0.13342\	1.35838
NTC_new_73	6	0.073049	0.19121	0.938947	388	4	-0.16559	0.39002	0.58002	0.999946	978	1	-0.16559\	1.35838
NTC_new_743	6	0.51238	0.66924	0.999997	1211	2	0.054917	0.39002	0.58002	0.999946	969	1	0.054917\	1.35838
NTC_new_76	6	0.38038	0.57124	0.999997	1045	1	0.014779	0.39002	0.58002	0.999946	974	2	0.014779\	1.35838
NTC_new_775	6	0.39632	0.58295	0.999997	1063	1	0.045317	0.39002	0.58002	0.999946	975	2	0.045317\	1.35838
NTC_new_804	6	0.46737	0.63478	0.999997	1163	1	-0.032704	0.39002	0.58002	0.999946	972	1	-0.032704\	1.35838
NTC_new_872	6	0.0013002	0.0065247	0.394338	31	4	-0.25819	0.39002	0.58002	0.999946	977	1	-0.25819\	1.35838
NTC_new_135	6	0.092801	0.2316	0.938947	471	3	-0.15705	0.3902	0.58018	0.999946	983	2	-0.15705\	1.35771
NTC_new_266	6	0.86464	0.87397	0.999997	1615	1	0.0037279	0.3902	0.58018	0.999946	982	2	0.0037279\	1.35771
NTC_new_308	6	0.23528	0.4243	0.999997	796	2	0.0027145	0.3902	0.58018	0.999946	981	2	0.0027145\	1.35771
NTC_new_46	6	0.90624	0.90746	0.999997	1669	1	0.033809	0.3902	0.58018	0.999946	985	2	0.033809\	1.35771
NTC_new_966	6	0.74862	0.81286	0.999997	1475	1	-0.029551	0.3902	0.58018	0.999946	984	2	-0.029551\	1.35771
FOXP4	6	0.056931	0.15655	0.926106	323	4	-0.22589	0.39525	0.58395	0.999946	986	2	-0.22589\	1.33916
NTC_new_1076	6	0.39632	0.58295	0.999997	1060	2	0.0062394	0.39914	0.58665	0.999946	990	2	0.0062394\	1.32503
NTC_new_142	6	0.23528	0.4243	0.999997	800	2	-0.03753	0.39914	0.58665	0.999946	989	2	-0.03753\	1.32503
NTC_new_162	6	0.80797	0.8402	0.999997	1539	1	0.10445	0.39914	0.58665	0.999946	988	2	0.10445\	1.32503
NTC_new_213	6	0.16685	0.3369	0.999997	644	3	-0.11162	0.39914	0.58665	0.999946	994	2	-0.11162\	1.32503
NTC_new_381	6	0.18574	0.3611	0.999997	676	2	0.099276	0.39914	0.58665	0.999946	993	2	0.099276\	1.32503
NTC_new_445	6	0.32373	0.53238	0.999997	978	2	0.041502	0.39914	0.58665	0.999946	997	2	0.041502\	1.32503
NTC_new_459	6	0.54728	0.6957	0.999997	1256	2	-0.027569	0.39914	0.58665	0.999946	995	2	-0.027569\	1.32503
NTC_new_580	6	0.05695	0.15659	0.926106	326	2	-0.026716	0.39914	0.58665	0.999946	996	2	-0.026716\	1.32503
NTC_new_826	6	0.088057	0.22196	0.938947	446	3	-0.081409	0.39914	0.58665	0.999946	992	2	-0.081409\	1.32503
NTC_new_967	6	0.78395	0.82822	0.999997	1514	1	0.045113	0.39914	0.58665	0.999946	987	2	0.045113\	1.32503
NTC_new_968	6	0.41043	0.59302	0.999997	1075	1	-0.018769	0.39914	0.58665	0.999946	991	2	-0.018769\	1.32503
NTC_new_185	6	0.20058	0.38002	0.999997	708	2	0.02933	0.40021	0.5874	0.999946	1004	1	0.02933\	1.32117
NTC_new_263	6	0.58025	0.72096	0.999997	1307	2	0.029511	0.40021	0.5874	0.999946	1005	1	0.029511\	1.32117
NTC_new_317	6	0.19348	0.37122	0.999997	696	2	0.080488	0.40021	0.5874	0.999946	1003	2	0.080488\	1.32117
NTC_new_339	6	0.62656	0.75742	0.999997	1371	2	0.087042	0.40021	0.5874	0.999946	1009	2	0.087042\	1.32117
NTC_new_561	6	0.034118	0.10501	0.846184	229	1	0.063397	0.40021	0.5874	0.999946	1007	2	0.063397\	1.32117
NTC_new_566	6	0.056567	0.15581	0.926106	322	3	-0.1612	0.40021	0.5874	0.999946	1000	1	-0.1612\	1.32117
NTC_new_585	6	0.042665	0.12471	0.908443	261	2	0.076957	0.40021	0.5874	0.999946	999	2	0.076957\	1.32117
NTC_new_627	6	0.21336	0.39628	0.999997	740	3	-0.12392	0.40021	0.5874	0.999946	1008	1	-0.12392\	1.32117
NTC_new_661	6	0.15187	0.31661	0.999997	612	3	-0.13108	0.40021	0.5874	0.999946	1006	1	-0.13108\	1.32117
NTC_new_719	6	0.62003	0.75238	0.999997	1364	2	0.068449	0.40021	0.5874	0.999946	998	2	0.068449\	1.32117
NTC_new_751	6	0.39262	0.58033	0.999997	1057	2	-0.024169	0.40021	0.5874	0.999946	1001	2	-0.024169\	1.32117
NTC_new_810	6	0.020986	0.072867	0.811682	173	4	-0.30909	0.40021	0.5874	0.999946	1002	2	-0.30909\	1.32117
CHD6	6	0.29489	0.49783	0.999997	923	3	-0.058259	0.40533	0.59092	0.999946	1010	2	-0.058259\	1.30283
WSB2	6	0.29556	0.4987	0.999997	925	3	-0.092396	0.40593	0.59135	0.999946	1011	1	-0.092396\	1.3007
JARID2	6	0.64223	0.77052	0.999997	1400	1	0.011672	0.40693	0.59202	0.999946	1012	2	0.011672\	1.29715
AURKB	6	0.47178	0.63812	0.999997	1167	2	0.080562	0.40743	0.59234	0.999946	1013	2	0.080562\	1.29538
APOBEC3D	6	0.64937	0.77649	0.999997	1411	2	-0.010602	0.40848	0.59314	0.999946	1014	2	-0.010602\	1.29166
WDR77	6	0.23516	0.42414	0.999997	788	1	0.10921	0.41036	0.59453	0.999946	1015	2	0.10921\	1.28504
HIST4H4	6	0.53184	0.68371	0.999997	1235	2	0.0066952	0.41193	0.5956	0.999946	1016	2	0.0066952\	1.27953
HDGF	6	0.01423	0.053096	0.728246	141	4	-0.26408	0.41226	0.59581	0.999946	1017	2	-0.26408\	1.27837
NTC_new_350	6	0.018533	0.06698	0.780359	163	3	-0.17876	0.41497	0.5978	0.999946	1019	2	-0.17876\	1.26892
NTC_new_367	6	0.10817	0.25783	0.960768	519	3	-0.10922	0.41497	0.5978	0.999946	1020	2	-0.10922\	1.26892
NTC_new_565	6	0.73594	0.80756	0.999997	1460	1	0.096863	0.41497	0.5978	0.999946	1018	2	0.096863\	1.26892
HIST1H3E	6	0.86034	0.87097	0.999997	1608	1	0.058868	0.41873	0.60055	0.999946	1021	2	0.058868\	1.25591
SNAI2	6	0.20918	0.39106	0.999997	732	2	0.0028788	0.41956	0.60118	0.999946	1022	2	0.0028788\	1.25305
H3F3A	6	0.27401	0.47292	0.999997	882	2	0.086393	0.42083	0.60203	0.999946	1023	2	0.086393\	1.24869
H1FNT	6	0.48127	0.64539	0.999997	1180	1	-0.0072874	0.42102	0.60216	0.999946	1024	2	-0.0072874\	1.24804
RNF17	6	0.80189	0.83697	0.999997	1532	1	0.1097	0.42123	0.60233	0.999946	1025	2	0.1097\	1.24732
RAD54L2	6	0.78838	0.83024	0.999997	1517	1	0.10088	0.42378	0.60408	0.999946	1026	2	0.10088\	1.23861
NTC_new_438	6	0.54728	0.6957	0.999997	1254	1	0.074559	0.42644	0.60585	0.999946	1031	2	0.074559\	1.22959
NTC_new_511	6	0.042665	0.12471	0.908443	260	2	-0.10356	0.42644	0.60585	0.999946	1027	2	-0.10356\	1.22959
NTC_new_526	6	0.1429	0.30433	0.987549	595	3	-0.092887	0.42644	0.60585	0.999946	1029	2	-0.092887\	1.22959
NTC_new_589	6	0.27733	0.47709	0.999997	889	1	0.058339	0.42644	0.60585	0.999946	1028	2	0.058339\	1.22959
NTC_new_960	6	0.60316	0.73914	0.999997	1340	1	0.077236	0.42644	0.60585	0.999946	1030	2	0.077236\	1.22959
NTC_new_182	6	0.12436	0.27956	0.973198	552	3	-0.16875	0.42882	0.60742	0.999946	1034	1	-0.16875\	1.22156
NTC_new_242	6	0.43102	0.6076	0.999997	1111	2	0.0031935	0.42882	0.60742	0.999946	1033	2	0.0031935\	1.22156
NTC_new_471	6	0.90876	0.90979	0.999997	1678	1	-0.02316	0.42882	0.60742	0.999946	1035	2	-0.02316\	1.22156
NTC_new_640	6	0.24154	0.43214	0.999997	809	2	-0.0094712	0.42882	0.60742	0.999946	1037	1	-0.0094712\	1.22156
NTC_new_83	6	0.6403	0.76881	0.999997	1395	2	-0.060901	0.42882	0.60742	0.999946	1036	2	-0.060901\	1.22156
NTC_new_998	6	0.51543	0.67152	0.999997	1216	2	-0.032704	0.42882	0.60742	0.999946	1032	1	-0.032704\	1.22156
SMN1	6	0.19751	0.37604	0.999997	706	3	-0.074031	0.42915	0.60771	0.999946	1038	2	-0.074031\	1.22045
UBE2N	1	0.5672	0.56773	0.999997	1286	0	0.06084	0.4328	0.43307	0.999946	1039	0	0.06084\	1.20823
NTC_new_361	6	0.22935	0.41679	0.999997	775	1	0.049331	0.43517	0.61224	0.999946	1041	2	0.049331\	1.20035
NTC_new_828	6	0.12194	0.27642	0.970216	548	2	0.029511	0.43517	0.61224	0.999946	1040	2	0.029511\	1.20035
DNMT3B	6	0.70413	0.79579	0.999997	1441	1	-0.0094928	0.43574	0.61274	0.999946	1042	2	-0.0094928\	1.19846
SIRT1	6	0.11581	0.26856	0.970216	533	2	0.020086	0.43703	0.6136	0.999946	1043	1	0.020086\	1.1942
KDM5B	6	0.65073	0.77769	0.999997	1416	2	0.053295	0.43849	0.61459	0.999946	1044	2	0.053295\	1.18938
NTC_new_1073	6	0.44006	0.61437	0.999997	1122	2	-0.0085585	0.44283	0.61758	0.999946	1049	2	-0.0085585\	1.17518
NTC_new_288	6	0.58051	0.72119	0.999997	1311	1	0.065113	0.44283	0.61758	0.999946	1046	2	0.065113\	1.17518
NTC_new_66	6	0.02464	0.081954	0.846184	182	3	-0.13998	0.44283	0.61758	0.999946	1047	2	-0.13998\	1.17518
NTC_new_722	6	0.60316	0.73914	0.999997	1339	1	-0.030599	0.44283	0.61758	0.999946	1048	2	-0.030599\	1.17518
NTC_new_760	6	0.011683	0.044163	0.723303	115	4	-0.27469	0.44283	0.61758	0.999946	1045	2	-0.27469\	1.17518
NTC_new_1042	6	0.65752	0.78038	0.999997	1418	1	-0.076871	0.44371	0.6182	0.999946	1058	1	-0.076871\	1.17231
NTC_new_14	6	0.12194	0.27642	0.970216	545	2	0.040413	0.44371	0.6182	0.999946	1057	2	0.040413\	1.17231
NTC_new_551	6	0.041548	0.12219	0.908443	257	4	-0.27215	0.44371	0.6182	0.999946	1050	1	-0.27215\	1.17231
NTC_new_650	6	0.086636	0.21895	0.938947	444	4	-0.14451	0.44371	0.6182	0.999946	1054	1	-0.14451\	1.17231
NTC_new_665	6	0.20911	0.39093	0.999997	731	3	-0.1621	0.44371	0.6182	0.999946	1055	1	-0.1621\	1.17231
NTC_new_71	6	0.6292	0.75956	0.999997	1376	1	-0.076853	0.44371	0.6182	0.999946	1056	1	-0.076853\	1.17231
NTC_new_737	6	0.26166	0.45748	0.999997	843	3	-0.044481	0.44371	0.6182	0.999946	1051	1	-0.044481\	1.17231
NTC_new_869	6	0.02464	0.081954	0.846184	184	3	-0.24582	0.44371	0.6182	0.999946	1052	2	-0.24582\	1.17231
NTC_new_878	6	0.034118	0.10501	0.846184	236	1	0.04934	0.44371	0.6182	0.999946	1053	2	0.04934\	1.17231
HMGN4	6	0.55562	0.70206	0.999997	1269	1	0.096175	0.44614	0.61997	0.999946	1059	2	0.096175\	1.16443
CTBP1	6	0.44561	0.61824	0.999997	1132	2	-0.057691	0.44841	0.62173	0.999946	1060	2	-0.057691\	1.15711
SIN3B	6	0.39715	0.58352	0.999997	1064	2	0.087569	0.45026	0.62312	0.999946	1061	2	0.087569\	1.15117
NTC_new_1093	6	0.63593	0.76514	0.999997	1386	1	0.036112	0.45378	0.62577	0.999946	1071	2	0.036112\	1.13994
NTC_new_247	6	0.85355	0.86636	0.999997	1595	1	-0.03858	0.45378	0.62577	0.999946	1069	2	-0.03858\	1.13994
NTC_new_249	6	0.26166	0.45748	0.999997	846	3	-0.11832	0.45378	0.62577	0.999946	1067	2	-0.11832\	1.13994
NTC_new_315	6	0.20911	0.39093	0.999997	730	3	-0.11992	0.45378	0.62577	0.999946	1068	1	-0.11992\	1.13994
NTC_new_329	6	0.066563	0.17725	0.926543	359	4	-0.16784	0.45378	0.62577	0.999946	1065	1	-0.16784\	1.13994
NTC_new_349	6	0.22567	0.41215	0.999997	768	3	-0.13971	0.45378	0.62577	0.999946	1062	1	-0.13971\	1.13994
NTC_new_398	6	0.57001	0.713	0.999997	1291	1	0.011702	0.45378	0.62577	0.999946	1066	1	0.011702\	1.13994
NTC_new_434	6	0.86464	0.87397	0.999997	1616	1	-0.065066	0.45378	0.62577	0.999946	1064	1	-0.065066\	1.13994
NTC_new_623	6	0.073049	0.19121	0.938947	387	4	-0.23452	0.45378	0.62577	0.999946	1063	1	-0.23452\	1.13994
NTC_new_949	6	0.32755	0.53502	0.999997	986	2	0.023186	0.45378	0.62577	0.999946	1070	1	0.023186\	1.13994
NTC_new_1072	6	0.49808	0.6581	0.999997	1193	1	0.035875	0.45387	0.62583	0.999946	1073	2	0.035875\	1.13965
NTC_new_354	6	0.26563	0.46239	0.999997	857	3	-0.055807	0.45387	0.62583	0.999946	1072	2	-0.055807\	1.13965
YWHAZ	6	0.95473	0.95505	0.999997	1771	0	0.056617	0.45705	0.6281	0.999946	1074	2	0.056617\	1.12958
WHSC1L1	6	0.46525	0.63303	0.999997	1157	2	-0.0045391	0.46123	0.6314	0.999946	1075	2	-0.0045391\	1.11644
NTC_new_1088	6	0.22917	0.41651	0.999997	773	2	0.013311	0.46136	0.63147	0.999946	1081	2	0.013311\	1.11604
NTC_new_150	6	0.87058	0.8783	0.999997	1623	1	0.034147	0.46136	0.63147	0.999946	1079	2	0.034147\	1.11604
NTC_new_32	6	0.15187	0.31661	0.999997	608	3	-0.11956	0.46136	0.63147	0.999946	1077	2	-0.11956\	1.11604
NTC_new_40	6	0.60744	0.74246	0.999997	1350	2	-0.066413	0.46136	0.63147	0.999946	1080	2	-0.066413\	1.11604
NTC_new_814	6	0.77404	0.82356	0.999997	1502	1	0.024256	0.46136	0.63147	0.999946	1076	2	0.024256\	1.11604
NTC_new_981	6	0.12048	0.27451	0.970216	537	3	-0.10579	0.46136	0.63147	0.999946	1078	2	-0.10579\	1.11604
CDY1	6	0.76631	0.82012	0.999997	1499	1	0.054323	0.46323	0.63276	0.999946	1083	2	0.054323\	1.1102
CDY1B	6	0.76631	0.82012	0.999997	1500	1	0.054323	0.46323	0.63276	0.999946	1082	2	0.054323\	1.1102
FAM175A	6	0.74417	0.81097	0.999997	1468	1	-0.0021524	0.46492	0.63408	0.999946	1084	2	-0.0021524\	1.10495
PARP2	6	0.047955	0.13699	0.926106	282	4	-0.26244	0.46523	0.63427	0.999946	1085	2	-0.26244\	1.10398
SMARCD3	6	0.74517	0.81144	0.999997	1470	1	-0.0079125	0.46614	0.63502	0.999946	1086	1	-0.0079125\	1.10116
RPH3A	6	0.64681	0.77435	0.999997	1408	2	-0.051743	0.46831	0.63676	0.999946	1087	2	-0.051743\	1.09446
ZNF532	6	0.28771	0.48942	0.999997	906	2	-0.0052496	0.46851	0.63689	0.999946	1088	2	-0.0052496\	1.09385
PADI2	6	0.91622	0.9168	0.999997	1705	0	0.081083	0.46889	0.63716	0.999946	1089	2	0.081083\	1.09268
MSL3	6	0.57428	0.71642	0.999997	1296	2	-0.032121	0.47133	0.63899	0.999946	1090	1	-0.032121\	1.08519
NTC_new_153	6	0.50589	0.66418	0.999997	1199	2	-0.013878	0.47178	0.63935	0.999946	1091	2	-0.013878\	1.08381
NTC_new_747	6	0.47572	0.64117	0.999997	1174	2	0.060619	0.47178	0.63935	0.999946	1093	2	0.060619\	1.08381
NTC_new_997	6	0.6403	0.76881	0.999997	1393	2	0.036153	0.47178	0.63935	0.999946	1092	2	0.036153\	1.08381
NTC_new_259	6	0.45315	0.62398	0.999997	1140	2	-0.0098889	0.47879	0.64463	0.999946	1097	2	-0.0098889\	1.06254
NTC_new_290	6	0.24861	0.44121	0.999997	820	2	0.039547	0.47879	0.64463	0.999946	1094	2	0.039547\	1.06254
NTC_new_294	6	0.85649	0.86823	0.999997	1599	1	0.066149	0.47879	0.64463	0.999946	1100	2	0.066149\	1.06254
NTC_new_456	6	0.26563	0.46239	0.999997	858	2	-0.011921	0.47879	0.64463	0.999946	1095	2	-0.011921\	1.06254
NTC_new_51	6	0.87425	0.88098	0.999997	1625	1	-0.088462	0.47879	0.64463	0.999946	1099	2	-0.088462\	1.06254
NTC_new_619	6	0.31012	0.51697	0.999997	953	2	0.010298	0.47879	0.64463	0.999946	1096	2	0.010298\	1.06254
NTC_new_791	6	0.12538	0.28079	0.973198	555	2	-0.12904	0.47879	0.64463	0.999946	1098	2	-0.12904\	1.06254
NTC_new_1035	6	0.31117	0.51814	0.999997	960	3	-0.11464	0.48008	0.64568	0.999946	1111	1	-0.11464\	1.05865
NTC_new_1041	6	0.051573	0.14527	0.926106	294	3	-0.18097	0.48008	0.64568	0.999946	1107	1	-0.18097\	1.05865
NTC_new_1066	6	0.049354	0.14009	0.926106	287	3	-0.23676	0.48008	0.64568	0.999946	1113	1	-0.23676\	1.05865
NTC_new_1070	6	0.31012	0.51697	0.999997	951	2	-0.03082	0.48008	0.64568	0.999946	1110	2	-0.03082\	1.05865
NTC_new_12	6	0.22917	0.41651	0.999997	769	2	0.011702	0.48008	0.64568	0.999946	1103	2	0.011702\	1.05865
NTC_new_125	6	0.030911	0.097507	0.846184	211	4	-0.21671	0.48008	0.64568	0.999946	1106	1	-0.21671\	1.05865
NTC_new_275	6	0.35833	0.55577	0.999997	1017	2	-0.01419	0.48008	0.64568	0.999946	1105	1	-0.01419\	1.05865
NTC_new_380	6	0.47544	0.64095	0.999997	1171	2	0.0043957	0.48008	0.64568	0.999946	1104	1	0.0043957\	1.05865
NTC_new_433	6	0.39262	0.58033	0.999997	1056	2	0.010953	0.48008	0.64568	0.999946	1112	2	0.010953\	1.05865
NTC_new_539	6	0.72388	0.80302	0.999997	1452	1	0.053642	0.48008	0.64568	0.999946	1114	2	0.053642\	1.05865
NTC_new_613	6	0.029153	0.093089	0.846184	205	4	-0.2525	0.48008	0.64568	0.999946	1109	1	-0.2525\	1.05865
NTC_new_652	6	0.010229	0.039407	0.71227	107	3	-0.067336	0.48008	0.64568	0.999946	1108	2	-0.067336\	1.05865
NTC_new_689	6	0.46218	0.63087	0.999997	1154	2	-0.057711	0.48008	0.64568	0.999946	1101	2	-0.057711\	1.05865
NTC_new_729	6	0.60744	0.74246	0.999997	1349	2	-0.067182	0.48008	0.64568	0.999946	1102	1	-0.067182\	1.05865
DPF1	6	0.23809	0.42775	0.999997	802	3	-0.13759	0.48314	0.648	0.999946	1115	2	-0.13759\	1.04949
PHC2	6	0.5514	0.6989	0.999997	1260	1	0.047674	0.48334	0.64816	0.999946	1116	2	0.047674\	1.04889
SIRT5	6	0.43059	0.60727	0.999997	1106	2	0.043259	0.48476	0.64916	0.999946	1117	2	0.043259\	1.04466
SMARCAL1	6	0.95449	0.95487	0.999997	1769	0	0.062342	0.48663	0.65041	0.999946	1118	2	0.062342\	1.0391
SMN2	6	0.19751	0.37604	0.999997	705	3	-0.074031	0.48799	0.65144	0.999946	1119	2	-0.074031\	1.03508
SUPT6H	6	0.62216	0.75405	0.999997	1366	2	-0.049961	0.48929	0.65225	0.999946	1120	2	-0.049961\	1.03124
NTC_new_127	6	0.25606	0.45043	0.999997	839	3	-0.023427	0.49111	0.65365	0.999946	1125	2	-0.023427\	1.02588
NTC_new_144	6	0.23004	0.41773	0.999997	782	3	-0.15643	0.49111	0.65365	0.999946	1121	2	-0.15643\	1.02588
NTC_new_20	6	0.51238	0.66924	0.999997	1208	2	0.044648	0.49111	0.65365	0.999946	1128	2	0.044648\	1.02588
NTC_new_201	6	0.2979	0.50151	0.999997	935	3	-0.022906	0.49111	0.65365	0.999946	1124	2	-0.022906\	1.02588
NTC_new_524	6	0.32373	0.53238	0.999997	981	2	-0.0001737	0.49111	0.65365	0.999946	1126	2	-0.0001737\	1.02588
NTC_new_653	6	0.13827	0.29818	0.985775	579	2	-0.026259	0.49111	0.65365	0.999946	1127	2	-0.026259\	1.02588
NTC_new_80	6	0.066773	0.17774	0.926543	370	3	-0.12895	0.49111	0.65365	0.999946	1123	2	-0.12895\	1.02588
NTC_new_926	6	0.58025	0.72096	0.999997	1308	2	0.090674	0.49111	0.65365	0.999946	1122	2	0.090674\	1.02588
RNF168	6	0.83301	0.85394	0.999997	1568	1	0.074889	0.49136	0.6538	0.999946	1129	1	0.074889\	1.02515
DTX3L	6	0.57166	0.71435	0.999997	1292	2	0.021282	0.49165	0.65407	0.999946	1130	2	0.021282\	1.0243
NTC_new_115	6	0.066773	0.17774	0.926543	365	2	-0.051202	0.49533	0.6569	0.999946	1131	2	-0.051202\	1.01354
NTC_new_60	6	0.2896	0.49163	0.999997	911	2	-0.0055018	0.49533	0.6569	0.999946	1132	2	-0.0055018\	1.01354
TDRD12	6	0.59629	0.73367	0.999997	1329	2	-0.086071	0.4975	0.65872	0.999946	1133	1	-0.086071\	1.00723
NTC_new_2	6	0.37183	0.56536	0.999997	1037	2	-0.036396	0.50445	0.66407	0.999946	1134	2	-0.036396\	0.987217
NTC_new_313	6	0.27026	0.46822	0.999997	877	2	-0.05152	0.50445	0.66407	0.999946	1136	1	-0.05152\	0.987217
NTC_new_368	6	0.0062441	0.025549	0.667715	73	4	-0.33368	0.50445	0.66407	0.999946	1135	1	-0.33368\	0.987217
NTC_new_505	6	0.034118	0.10501	0.846184	227	3	-0.18731	0.50445	0.66407	0.999946	1140	1	-0.18731\	0.987217
NTC_new_748	6	0.034118	0.10501	0.846184	238	2	-0.021365	0.50445	0.66407	0.999946	1137	1	-0.021365\	0.987217
NTC_new_818	6	0.50589	0.66418	0.999997	1201	1	0.026278	0.50445	0.66407	0.999946	1139	2	0.026278\	0.987217
NTC_new_851	6	0.018533	0.06698	0.780359	166	3	-0.23157	0.50445	0.66407	0.999946	1138	1	-0.23157\	0.987217
MST1	6	0.43092	0.60752	0.999997	1107	1	0.013645	0.50602	0.66524	0.999946	1141	2	0.013645\	0.982734
VRK1	6	0.60446	0.74012	0.999997	1345	2	-0.055971	0.50761	0.6664	0.999946	1142	2	-0.055971\	0.978208
PRKAB1	6	0.20748	0.38901	0.999997	727	2	-0.009575	0.50846	0.66711	0.999946	1143	1	-0.009575\	0.975794
NTC_new_45	6	0.45644	0.62629	0.999997	1146	2	0.018875	0.51178	0.66962	0.999946	1144	2	0.018875\	0.966404
NTC_new_553	6	0.15187	0.31661	0.999997	607	2	0.039973	0.51178	0.66962	0.999946	1145	2	0.039973\	0.966404
NTC_new_111	6	0.056567	0.15581	0.926106	321	3	-0.11025	0.51288	0.67057	0.999946	1146	1	-0.11025\	0.963307
NTC_new_351	6	0.21974	0.40437	0.999997	752	2	0.010657	0.51288	0.67057	0.999946	1147	1	0.010657\	0.963307
NTC_new_413	6	0.59299	0.73107	0.999997	1322	2	0.042672	0.51288	0.67057	0.999946	1148	1	0.042672\	0.963307
NTC_new_554	6	0.062045	0.16763	0.926543	343	2	-0.051094	0.51288	0.67057	0.999946	1156	2	-0.051094\	0.963307
NTC_new_63	6	0.10007	0.24611	0.960768	491	3	-0.12894	0.51288	0.67057	0.999946	1155	1	-0.12894\	0.963307
NTC_new_663	6	0.15461	0.32044	0.999997	614	3	-0.0889	0.51288	0.67057	0.999946	1149	2	-0.0889\	0.963307
NTC_new_706	6	0.12538	0.28079	0.973198	557	3	-0.17643	0.51288	0.67057	0.999946	1154	1	-0.17643\	0.963307
NTC_new_790	6	0.064443	0.17281	0.926543	349	4	-0.17926	0.51288	0.67057	0.999946	1153	1	-0.17926\	0.963307
NTC_new_885	6	0.010984	0.041915	0.717997	112	4	-0.30757	0.51288	0.67057	0.999946	1152	1	-0.30757\	0.963307
NTC_new_94	6	0.93788	0.93875	0.999997	1737	0	0.040272	0.51288	0.67057	0.999946	1150	2	0.040272\	0.963307
NTC_new_96	6	0.06513	0.17419	0.926543	353	3	-0.15906	0.51288	0.67057	0.999946	1151	1	-0.15906\	0.963307
NTC_new_1082	6	0.30519	0.5107	0.999997	945	3	-0.13381	0.52008	0.67577	0.999946	1159	2	-0.13381\	0.943195
NTC_new_646	6	0.19348	0.37122	0.999997	697	3	-0.13072	0.52008	0.67577	0.999946	1157	2	-0.13072\	0.943195
NTC_new_673	6	0.055253	0.15307	0.926106	308	3	-0.10488	0.52008	0.67577	0.999946	1158	2	-0.10488\	0.943195
NTC_new_781	6	0.16308	0.33179	0.999997	631	3	-0.042694	0.52008	0.67577	0.999946	1162	2	-0.042694\	0.943195
NTC_new_965	6	0.26563	0.46239	0.999997	861	2	0.067659	0.52008	0.67577	0.999946	1160	2	0.067659\	0.943195
NTC_new_983	6	0.073255	0.1916	0.938947	392	3	-0.21635	0.52008	0.67577	0.999946	1161	2	-0.21635\	0.943195
PHF19	6	0.36673	0.56166	0.999997	1031	1	0.008338	0.52382	0.67857	0.999946	1163	2	0.008338\	0.932857
NTC_new_1044	6	0.27347	0.47217	0.999997	879	3	-0.1321	0.52439	0.67895	0.999946	1165	2	-0.1321\	0.931288
NTC_new_1084	6	0.0044966	0.018873	0.58871	62	5	-0.3244	0.52439	0.67895	0.999946	1174	1	-0.3244\	0.931288
NTC_new_128	6	0.075451	0.19613	0.938947	398	4	-0.1967	0.52439	0.67895	0.999946	1175	1	-0.1967\	0.931288
NTC_new_279	6	0.47544	0.64095	0.999997	1173	2	-0.099695	0.52439	0.67895	0.999946	1172	1	-0.099695\	0.931288
NTC_new_330	6	0.081259	0.20812	0.938947	425	4	-0.16215	0.52439	0.67895	0.999946	1169	1	-0.16215\	0.931288
NTC_new_378	6	0.28627	0.48778	0.999997	904	3	-0.043819	0.52439	0.67895	0.999946	1168	1	-0.043819\	0.931288
NTC_new_506	6	0.6292	0.75956	0.999997	1375	1	0.056914	0.52439	0.67895	0.999946	1170	1	0.056914\	0.931288
NTC_new_509	6	0.1429	0.30433	0.987549	592	3	-0.11603	0.52439	0.67895	0.999946	1171	1	-0.11603\	0.931288
NTC_new_655	6	0.10817	0.25783	0.960768	513	2	-0.10734	0.52439	0.67895	0.999946	1176	1	-0.10734\	0.931288
NTC_new_691	6	0.89485	0.89704	0.999997	1653	1	0.043466	0.52439	0.67895	0.999946	1173	2	0.043466\	0.931288
NTC_new_800	6	0.16374	0.33263	0.999997	633	2	0.099358	0.52439	0.67895	0.999946	1167	2	0.099358\	0.931288
NTC_new_95	6	0.58699	0.72649	0.999997	1318	1	-0.016404	0.52439	0.67895	0.999946	1164	1	-0.016404\	0.931288
NTC_new_980	6	0.010032	0.038772	0.71227	105	1	-0.049677	0.52439	0.67895	0.999946	1166	1	-0.049677\	0.931288
PADI4	6	0.91106	0.91192	0.999997	1683	1	0.011995	0.52676	0.68071	0.999946	1177	2	0.011995\	0.924782
BRWD1	6	0.66005	0.78114	0.999997	1419	1	0.073164	0.52896	0.68234	0.999946	1178	2	0.073164\	0.918769
TRIM33	6	0.91995	0.92052	0.999997	1709	0	-0.047063	0.53028	0.68332	0.999946	1179	2	-0.047063\	0.915174
NTC_new_1081	6	0.00070689	0.0035708	0.354703	16	3	-0.31437	0.53281	0.68525	0.999946	1184	2	-0.31437\	0.908307
NTC_new_181	6	0.90876	0.90979	0.999997	1677	1	0.10806	0.53281	0.68525	0.999946	1185	2	0.10806\	0.908307
NTC_new_507	6	0.26267	0.45861	0.999997	850	2	0.031503	0.53281	0.68525	0.999946	1181	2	0.031503\	0.908307
NTC_new_618	6	0.035669	0.10874	0.86544	243	3	-0.20344	0.53281	0.68525	0.999946	1183	2	-0.20344\	0.908307
NTC_new_823	6	0.65016	0.77724	0.999997	1415	1	0.058155	0.53281	0.68525	0.999946	1182	2	0.058155\	0.908307
NTC_new_917	6	0.073049	0.19121	0.938947	390	4	-0.19638	0.53281	0.68525	0.999946	1180	2	-0.19638\	0.908307
NTC_new_319	6	0.00258	0.01167	0.490852	44	5	-0.33882	0.53473	0.6868	0.999946	1188	1	-0.33882\	0.903117
NTC_new_447	6	0.028345	0.091052	0.846184	202	3	-0.2214	0.53473	0.6868	0.999946	1192	2	-0.2214\	0.903117
NTC_new_514	6	0.21974	0.40437	0.999997	756	3	-0.066787	0.53473	0.6868	0.999946	1187	2	-0.066787\	0.903117
NTC_new_564	6	0.61416	0.74787	0.999997	1353	2	0.045555	0.53473	0.6868	0.999946	1190	1	0.045555\	0.903117
NTC_new_727	6	0.1136	0.26549	0.970216	527	2	-0.11463	0.53473	0.6868	0.999946	1186	1	-0.11463\	0.903117
NTC_new_812	6	0.050384	0.14248	0.926106	291	3	-0.16062	0.53473	0.6868	0.999946	1189	1	-0.16062\	0.903117
NTC_new_891	6	0.12048	0.27451	0.970216	540	3	-0.17632	0.53473	0.6868	0.999946	1191	1	-0.17632\	0.903117
HIST1H4G	6	0.41873	0.59904	0.999997	1087	2	0.012722	0.53573	0.68764	0.999946	1193	2	0.012722\	0.900422
NEK9	6	0.50722	0.66512	0.999997	1203	2	-0.067874	0.53826	0.68958	0.999946	1194	2	-0.067874\	0.893625
ATM	6	0.75397	0.81498	0.999997	1483	1	-0.03186	0.53864	0.68985	0.999946	1195	2	-0.03186\	0.892607
BCORL1	6	0.33502	0.54007	0.999997	989	2	-0.027666	0.54039	0.69111	0.999946	1196	2	-0.027666\	0.887927
HMG20B	6	0.57674	0.71836	0.999997	1303	2	-0.1184	0.54174	0.69203	0.999946	1197	2	-0.1184\	0.884327
EHMT2	6	0.45999	0.62905	0.999997	1150	1	-0.034246	0.54213	0.6923	0.999946	1198	2	-0.034246\	0.883289
NTC_new_1016	6	0.44006	0.61437	0.999997	1125	2	-0.075129	0.54286	0.69283	0.999946	1200	1	-0.075129\	0.881348
NTC_new_229	6	0.19052	0.36751	0.999997	690	3	-0.09925	0.54286	0.69283	0.999946	1201	1	-0.09925\	0.881348
NTC_new_385	6	0.055253	0.15307	0.926106	307	3	-0.24254	0.54286	0.69283	0.999946	1204	1	-0.24254\	0.881348
NTC_new_555	6	0.20214	0.38205	0.999997	718	1	0.010481	0.54286	0.69283	0.999946	1202	1	0.010481\	0.881348
NTC_new_859	6	0.87058	0.8783	0.999997	1622	1	0.025837	0.54286	0.69283	0.999946	1199	2	0.025837\	0.881348
NTC_new_958	6	0.13144	0.28886	0.980085	568	2	-0.059361	0.54286	0.69283	0.999946	1203	1	-0.059361\	0.881348
NTC_new_1045	6	0.44006	0.61437	0.999997	1124	2	0.032144	0.54425	0.69404	0.999946	1209	2	0.032144\	0.877659
NTC_new_220	6	0.95955	0.95992	0.999997	1786	0	0.088061	0.54425	0.69404	0.999946	1208	2	0.088061\	0.877659
NTC_new_452	6	0.60011	0.73668	0.999997	1331	2	-0.10194	0.54425	0.69404	0.999946	1205	2	-0.10194\	0.877659
NTC_new_638	6	0.055253	0.15307	0.926106	316	1	0.0063142	0.54425	0.69404	0.999946	1206	2	0.0063142\	0.877659
NTC_new_836	6	0.24154	0.43214	0.999997	806	1	0.050543	0.54425	0.69404	0.999946	1207	2	0.050543\	0.877659
HDAC9	6	0.46668	0.63423	0.999997	1158	2	0.026419	0.54688	0.69619	0.999946	1210	2	0.026419\	0.870704
ATXN7	6	0.027267	0.088482	0.846184	199	3	-0.1823	0.54753	0.69658	0.999946	1211	2	-0.1823\	0.86899
MAX	6	0.96319	0.96347	0.999997	1792	0	0.019684	0.54772	0.69674	0.999946	1212	2	0.019684\	0.86849
RING1	6	0.72696	0.80413	0.999997	1453	1	0.094105	0.54791	0.69688	0.999946	1213	2	0.094105\	0.867989
PHF23	6	0.31455	0.52233	0.999997	962	3	-0.08686	0.54829	0.69713	0.999946	1214	2	-0.08686\	0.866989
HDAC5	6	0.054173	0.15082	0.926106	300	4	-0.20301	0.54868	0.69743	0.999946	1215	2	-0.20301\	0.865963
NCOR2	6	0.076014	0.19735	0.938947	402	3	-0.18886	0.54928	0.69794	0.999946	1216	1	-0.18886\	0.864386
HIST1H2BB	6	0.36319	0.55931	0.999997	1026	1	0.0014594	0.55299	0.7007	0.999946	1217	1	0.0014594\	0.854675
A1CF	6	0.62064	0.75289	0.999997	1365	1	-0.044001	0.55536	0.70253	0.999946	1218	2	-0.044001\	0.848505
NTC_new_104	6	0.2896	0.49163	0.999997	913	2	0.085886	0.55557	0.70268	0.999946	1225	2	0.085886\	0.847959
NTC_new_124	6	0.26166	0.45748	0.999997	844	3	-0.044485	0.55557	0.70268	0.999946	1221	2	-0.044485\	0.847959
NTC_new_160	6	0.81192	0.84229	0.999997	1545	1	0.066049	0.55557	0.70268	0.999946	1223	2	0.066049\	0.847959
NTC_new_473	6	0.6292	0.75956	0.999997	1374	1	0.09248	0.55557	0.70268	0.999946	1224	2	0.09248\	0.847959
NTC_new_675	6	0.52754	0.6805	0.999997	1229	2	-0.019785	0.55557	0.70268	0.999946	1219	2	-0.019785\	0.847959
NTC_new_731	6	0.41919	0.59937	0.999997	1090	2	0.037412	0.55557	0.70268	0.999946	1222	2	0.037412\	0.847959
NTC_new_789	6	0.52758	0.68055	0.999997	1232	1	0.053687	0.55557	0.70268	0.999946	1226	2	0.053687\	0.847959
NTC_new_884	6	0.22935	0.41679	0.999997	779	2	-0.097801	0.55557	0.70268	0.999946	1220	2	-0.097801\	0.847959
PRDM15	6	0.28405	0.48515	0.999997	899	2	-0.032842	0.559	0.70534	0.999946	1227	2	-0.032842\	0.83908
PAF1	6	0.48097	0.64521	0.999997	1179	1	0.12901	0.55981	0.70599	0.999946	1228	2	0.12901\	0.836991
NTC_new_216	6	0.95955	0.95992	0.999997	1785	0	0.029493	0.56223	0.70777	0.999946	1229	2	0.029493\	0.830768
NTC_new_401	6	0.85355	0.86636	0.999997	1597	1	-0.07052	0.56223	0.70777	0.999946	1232	2	-0.07052\	0.830768
NTC_new_448	6	0.73594	0.80756	0.999997	1461	1	0.073798	0.56223	0.70777	0.999946	1230	2	0.073798\	0.830768
NTC_new_635	6	0.061925	0.16733	0.926543	340	4	-0.20284	0.56223	0.70777	0.999946	1231	2	-0.20284\	0.830768
NTC_new_842	6	0.055253	0.15307	0.926106	304	2	0.010703	0.56223	0.70777	0.999946	1233	2	0.010703\	0.830768
MINA	6	0.20711	0.38851	0.999997	725	3	-0.13004	0.56293	0.7083	0.999946	1234	2	-0.13004\	0.828973
CHD1L	6	0.96471	0.96511	0.999997	1799	0	0.073217	0.56695	0.71133	0.999946	1235	2	0.073217\	0.818707
PHC3	6	0.98173	0.98161	0.999997	1838	0	0.13848	0.56827	0.71232	0.999946	1236	2	0.13848\	0.815352
ZFP57	6	0.72184	0.80227	0.999997	1451	1	0.12367	0.56865	0.71257	0.999946	1237	2	0.12367\	0.814387
APOBEC3F	6	0.40282	0.58761	0.999997	1070	2	-0.012619	0.56921	0.71297	0.999946	1238	2	-0.012619\	0.812967
NTC_new_1001	6	0.13827	0.29818	0.985775	576	3	-0.067436	0.5704	0.71395	0.999946	1241	1	-0.067436\	0.809954
NTC_new_252	6	0.055253	0.15307	0.926106	310	3	-0.17152	0.5704	0.71395	0.999946	1242	1	-0.17152\	0.809954
NTC_new_370	6	0.26714	0.46426	0.999997	868	3	-0.15752	0.5704	0.71395	0.999946	1240	1	-0.15752\	0.809954
NTC_new_393	6	0.23004	0.41773	0.999997	783	3	-0.12655	0.5704	0.71395	0.999946	1239	1	-0.12655\	0.809954
NTC_new_442	6	0.87721	0.8831	0.999997	1631	1	0.024348	0.5704	0.71395	0.999946	1243	2	0.024348\	0.809954
NTC_new_62	6	0.008429	0.033223	0.71227	84	3	-0.13596	0.5704	0.71395	0.999946	1245	1	-0.13596\	0.809954
NTC_new_7	6	0.9612	0.96143	0.999997	1789	0	0.045644	0.5704	0.71395	0.999946	1244	2	0.045644\	0.809954
NTC_new_126	6	0.47572	0.64117	0.999997	1176	2	-0.057419	0.57119	0.71453	0.999946	1246	2	-0.057419\	0.807957
NTC_new_16	6	0.15023	0.3144	0.999997	603	3	-0.14798	0.57119	0.71453	0.999946	1248	2	-0.14798\	0.807957
NTC_new_167	6	0.20214	0.38205	0.999997	717	1	0.064679	0.57119	0.71453	0.999946	1247	2	0.064679\	0.807957
NTC_new_678	6	0.49808	0.6581	0.999997	1197	1	-0.1152	0.57119	0.71453	0.999946	1249	2	-0.1152\	0.807957
DPF2	6	0.46504	0.63288	0.999997	1156	2	-0.10062	0.5741	0.71688	0.999946	1250	2	-0.10062\	0.800626
BRD7	6	0.31693	0.52515	0.999997	967	3	-0.065015	0.57503	0.71761	0.999946	1251	2	-0.065015\	0.798291
NPAS2	6	0.10205	0.24964	0.960768	498	1	-0.01464	0.57573	0.71808	0.999946	1252	2	-0.01464\	0.796536
HBP1	6	0.94866	0.9494	0.999997	1754	0	0.051487	0.57624	0.71845	0.999946	1253	1	0.051487\	0.795258
HIST1H2BO	6	0.04237	0.12412	0.908443	259	2	0.11779	0.57634	0.71853	0.999946	1254	2	0.11779\	0.795008
ADNP	6	0.76561	0.81979	0.999997	1498	1	-0.012433	0.57649	0.7187	0.999946	1255	1	-0.012433\	0.794633
SHPRH	6	0.17281	0.34441	0.999997	656	1	-0.026752	0.577	0.71908	0.999946	1256	1	-0.026752\	0.793357
HIST1H3D	6	0.20726	0.38873	0.999997	726	3	-0.099903	0.57858	0.72034	0.999946	1257	2	-0.099903\	0.789412
CHD9	6	0.89362	0.89604	0.999997	1652	1	0.040795	0.58007	0.72139	0.999946	1258	2	0.040795\	0.785701
FOXO1	6	0.058275	0.15929	0.926543	329	3	-0.20776	0.58051	0.7217	0.999946	1259	1	-0.20776\	0.784607
SUDS3	6	0.57559	0.7174	0.999997	1300	2	-0.084006	0.58396	0.72455	0.999946	1260	2	-0.084006\	0.776059
NTC_new_172	6	0.066563	0.17725	0.926543	358	4	-0.19791	0.58624	0.72634	0.999946	1266	2	-0.19791\	0.770437
NTC_new_192	6	0.049354	0.14009	0.926106	288	3	-0.14499	0.58624	0.72634	0.999946	1265	1	-0.14499\	0.770437
NTC_new_251	6	0.32237	0.53132	0.999997	973	2	-0.071874	0.58624	0.72634	0.999946	1267	1	-0.071874\	0.770437
NTC_new_574	6	0.20214	0.38205	0.999997	719	3	-0.10853	0.58624	0.72634	0.999946	1261	1	-0.10853\	0.770437
NTC_new_597	6	0.35624	0.5542	0.999997	1011	2	-0.073341	0.58624	0.72634	0.999946	1262	1	-0.073341\	0.770437
NTC_new_774	6	0.080105	0.20564	0.938947	421	2	-0.070879	0.58624	0.72634	0.999946	1264	1	-0.070879\	0.770437
NTC_new_848	6	0.0086578	0.034062	0.71227	86	4	-0.29174	0.58624	0.72634	0.999946	1263	1	-0.29174\	0.770437
NTC_new_1014	6	0.49808	0.6581	0.999997	1196	2	-0.069433	0.58812	0.72779	0.999946	1275	2	-0.069433\	0.765818
NTC_new_1030	6	0.56893	0.7122	0.999997	1287	2	-0.0055398	0.58812	0.72779	0.999946	1273	2	-0.0055398\	0.765818
NTC_new_197	6	0.67964	0.78728	0.999997	1426	1	0.067812	0.58812	0.72779	0.999946	1270	2	0.067812\	0.765818
NTC_new_325	6	0.59299	0.73107	0.999997	1323	2	0.024144	0.58812	0.72779	0.999946	1276	2	0.024144\	0.765818
NTC_new_346	6	0.25606	0.45043	0.999997	837	3	-0.085766	0.58812	0.72779	0.999946	1272	2	-0.085766\	0.765818
NTC_new_396	6	0.090518	0.22691	0.938947	461	3	-0.17167	0.58812	0.72779	0.999946	1269	2	-0.17167\	0.765818
NTC_new_479	6	0.44325	0.61649	0.999997	1128	2	-0.029596	0.58812	0.72779	0.999946	1271	2	-0.029596\	0.765818
NTC_new_488	6	0.99129	0.99128	0.999997	1866	0	0.086966	0.58812	0.72779	0.999946	1274	2	0.086966\	0.765818
NTC_new_816	6	0.080105	0.20564	0.938947	414	1	-0.0013137	0.58812	0.72779	0.999946	1268	2	-0.0013137\	0.765818
NTC_new_53	6	0.27733	0.47709	0.999997	892	3	-0.045001	0.59382	0.7321	0.999946	1280	2	-0.045001\	0.751902
NTC_new_591	6	0.80014	0.83598	0.999997	1529	1	-0.044458	0.59382	0.7321	0.999946	1277	2	-0.044458\	0.751902
NTC_new_611	6	0.54338	0.69259	0.999997	1250	2	-0.033276	0.59382	0.7321	0.999946	1279	2	-0.033276\	0.751902
NTC_new_757	6	0.59581	0.73331	0.999997	1326	1	0.030465	0.59382	0.7321	0.999946	1278	2	0.030465\	0.751902
HIST1H2BA	6	0.41458	0.59597	0.999997	1084	2	-0.047835	0.59556	0.73352	0.999946	1281	2	-0.047835\	0.747681
NTC_new_1015	6	0.82759	0.851	0.999997	1562	1	-0.036424	0.59799	0.73544	0.999946	1284	1	-0.036424\	0.741807
NTC_new_168	6	0.27809	0.47793	0.999997	894	2	0.0087002	0.59799	0.73544	0.999946	1282	2	0.0087002\	0.741807
NTC_new_260	6	0.25437	0.44852	0.999997	830	1	-0.002905	0.59799	0.73544	0.999946	1288	2	-0.002905\	0.741807
NTC_new_371	6	0.13144	0.28886	0.980085	569	2	-0.078362	0.59799	0.73544	0.999946	1289	2	-0.078362\	0.741807
NTC_new_390	6	0.48142	0.64552	0.999997	1181	2	-0.046311	0.59799	0.73544	0.999946	1286	1	-0.046311\	0.741807
NTC_new_432	6	0.90624	0.90746	0.999997	1671	1	0.047697	0.59799	0.73544	0.999946	1287	2	0.047697\	0.741807
NTC_new_696	6	0.20663	0.38791	0.999997	724	2	-0.03207	0.59799	0.73544	0.999946	1283	1	-0.03207\	0.741807
NTC_new_876	6	0.27026	0.46822	0.999997	876	3	-0.10733	0.59799	0.73544	0.999946	1285	1	-0.10733\	0.741807
NTC_new_244	6	0.026365	0.086301	0.846184	191	3	-0.18246	0.59829	0.73566	0.999946	1293	2	-0.18246\	0.741083
NTC_new_369	6	0.034118	0.10501	0.846184	233	2	0.038065	0.59829	0.73566	0.999946	1292	2	0.038065\	0.741083
NTC_new_703	6	0.24861	0.44121	0.999997	819	2	-0.0062842	0.59829	0.73566	0.999946	1294	2	-0.0062842\	0.741083
NTC_new_742	6	0.58674	0.7263	0.999997	1317	2	0.064976	0.59829	0.73566	0.999946	1291	2	0.064976\	0.741083
NTC_new_745	6	0.010032	0.038772	0.71227	97	3	-0.078427	0.59829	0.73566	0.999946	1290	2	-0.078427\	0.741083
MBD6	6	0.93515	0.9361	0.999997	1736	0	0.036062	0.60356	0.73983	0.999946	1295	2	0.036062\	0.728431
SYNCRIP	6	0.25335	0.44717	0.999997	827	3	-0.14019	0.60374	0.73998	0.999946	1296	2	-0.14019\	0.728001
NTC_new_1020	6	0.12538	0.28079	0.973198	556	2	-0.027634	0.60483	0.74075	0.999946	1300	1	-0.027634\	0.725398
NTC_new_108	6	0.2979	0.50151	0.999997	932	3	-0.089909	0.60483	0.74075	0.999946	1299	1	-0.089909\	0.725398
NTC_new_359	6	0.066773	0.17774	0.926543	364	2	-0.015833	0.60483	0.74075	0.999946	1298	1	-0.015833\	0.725398
NTC_new_518	6	0.27733	0.47709	0.999997	891	2	-0.12067	0.60483	0.74075	0.999946	1301	2	-0.12067\	0.725398
NTC_new_59	6	0.071647	0.18818	0.938947	384	3	-0.15091	0.60483	0.74075	0.999946	1302	1	-0.15091\	0.725398
NTC_new_831	6	0.80455	0.83837	0.999997	1535	1	0.066814	0.60483	0.74075	0.999946	1297	1	0.066814\	0.725398
NTC_new_110	6	0.51543	0.67152	0.999997	1214	2	0.049472	0.60573	0.74143	0.999946	1304	2	0.049472\	0.723253
NTC_new_600	6	0.033197	0.10304	0.846184	220	3	-0.22277	0.60573	0.74143	0.999946	1303	2	-0.22277\	0.723253
NTC_new_240	6	0.039553	0.1175	0.908443	249	3	-0.23195	0.61005	0.74492	0.999946	1307	2	-0.23195\	0.713001
NTC_new_8	6	0.34225	0.54476	0.999997	994	2	0.04553	0.61005	0.74492	0.999946	1306	2	0.04553\	0.713001
NTC_new_893	6	0.66455	0.78255	0.999997	1420	1	-0.00080473	0.61005	0.74492	0.999946	1305	2	-0.00080473\	0.713001
SKP1	6	0.71537	0.79987	0.999997	1447	1	0.080517	0.61016	0.74498	0.999946	1308	2	0.080517\	0.71274
SETD8	6	0.95354	0.95394	0.999997	1766	0	0.099432	0.61087	0.74548	0.999946	1309	2	0.099432\	0.711063
PYGO2	6	0.00077468	0.0039701	0.365629	21	4	-0.50556	0.61202	0.7465	0.999946	1310	2	-0.50556\	0.708349
CHRAC1	6	0.91133	0.91218	0.999997	1685	1	0.083412	0.61204	0.7465	0.999946	1311	2	0.083412\	0.708302
ZCWPW1	6	0.3859	0.57526	0.999997	1052	2	-0.021107	0.61228	0.74667	0.999946	1312	1	-0.021107\	0.707737
GADD45A	6	0.71592	0.80008	0.999997	1448	1	0.062224	0.61275	0.747	0.999946	1313	1	0.062224\	0.70663
NTC_new_133	6	0.012631	0.047613	0.723303	123	4	-0.2768	0.61675	0.75006	0.999946	1315	2	-0.2768\	0.697242
NTC_new_866	6	0.96552	0.96587	0.999997	1800	0	0.054917	0.61675	0.75006	0.999946	1314	2	0.054917\	0.697242
NTC_new_948	6	0.52754	0.6805	0.999997	1227	2	-0.074157	0.61675	0.75006	0.999946	1316	2	-0.074157\	0.697242
NTC_new_136	6	0.12436	0.27956	0.973198	553	3	-0.21352	0.6181	0.75112	0.999946	1320	1	-0.21352\	0.694088
NTC_new_238	6	0.27733	0.47709	0.999997	886	2	0.017667	0.6181	0.75112	0.999946	1319	1	0.017667\	0.694088
NTC_new_577	6	0.27347	0.47217	0.999997	881	3	-0.16454	0.6181	0.75112	0.999946	1317	1	-0.16454\	0.694088
NTC_new_795	6	0.9003	0.90219	0.999997	1662	1	-0.0074568	0.6181	0.75112	0.999946	1318	1	-0.0074568\	0.694088
NTC_new_947	6	0.084092	0.21385	0.938947	437	4	-0.16637	0.6181	0.75112	0.999946	1321	1	-0.16637\	0.694088
LRWD1	6	0.039203	0.11671	0.908443	248	3	-0.19589	0.62357	0.75528	0.999946	1322	2	-0.19589\	0.681377
ARNTL	6	0.68253	0.78817	0.999997	1428	1	0.0058822	0.62392	0.75559	0.999946	1323	2	0.0058822\	0.680567
MBD5	6	0.48187	0.64583	0.999997	1183	1	0.028488	0.62463	0.75613	0.999946	1324	2	0.028488\	0.678926
NTC_new_157	6	0.0018822	0.0090486	0.472973	37	5	-0.35735	0.6275	0.75842	0.999946	1327	1	-0.35735\	0.672313
NTC_new_178	6	0.10591	0.25468	0.960768	507	3	-0.21638	0.6275	0.75842	0.999946	1326	1	-0.21638\	0.672313
NTC_new_52	6	0.21974	0.40437	0.999997	751	2	0.0012635	0.6275	0.75842	0.999946	1325	1	0.0012635\	0.672313
NTC_new_543	6	0.013971	0.052093	0.723303	138	5	-0.24887	0.6275	0.75842	0.999946	1328	1	-0.24887\	0.672313
NTC_new_977	6	0.10591	0.25468	0.960768	502	3	-0.19291	0.6275	0.75842	0.999946	1329	1	-0.19291\	0.672313
NTC_new_147	6	0.010032	0.038772	0.71227	99	3	-0.228	0.62761	0.75845	0.999946	1333	2	-0.228\	0.67206
NTC_new_387	6	0.9612	0.96143	0.999997	1790	0	0.07998	0.62761	0.75845	0.999946	1337	2	0.07998\	0.67206
NTC_new_417	6	0.61508	0.74857	0.999997	1357	1	0.01029	0.62761	0.75845	0.999946	1330	2	0.01029\	0.67206
NTC_new_449	6	0.54728	0.6957	0.999997	1255	1	-0.00092262	0.62761	0.75845	0.999946	1336	2	-0.00092262\	0.67206
NTC_new_56	6	0.65016	0.77724	0.999997	1414	1	0.050031	0.62761	0.75845	0.999946	1335	2	0.050031\	0.67206
NTC_new_680	6	0.51543	0.67152	0.999997	1212	2	0.029882	0.62761	0.75845	0.999946	1332	2	0.029882\	0.67206
NTC_new_85	6	0.58699	0.72649	0.999997	1319	1	-0.020304	0.62761	0.75845	0.999946	1334	2	-0.020304\	0.67206
NTC_new_956	6	0.05695	0.15659	0.926106	325	3	-0.14522	0.62761	0.75845	0.999946	1331	2	-0.14522\	0.67206
KANSL3	6	0.97227	0.97242	0.999997	1813	0	0.086983	0.63042	0.76077	0.999946	1338	2	0.086983\	0.665615
ALKBH1	6	0.78135	0.82703	0.999997	1510	1	0.014675	0.63076	0.76107	0.999946	1339	2	0.014675\	0.664837
ATF7IP	6	0.0018068	0.0086186	0.463009	36	4	-0.25167	0.63157	0.76179	0.999946	1340	1	-0.25167\	0.662985
SIRT2	6	0.0057156	0.023552	0.650707	70	4	-0.37712	0.63321	0.76312	0.999946	1341	2	-0.37712\	0.659244
CDYL	6	0.85203	0.8654	0.999997	1593	1	0.018682	0.6339	0.76365	0.999946	1342	2	0.018682\	0.657673
HDAC4	6	0.020234	0.071065	0.800224	171	4	-0.20289	0.63448	0.76412	0.999946	1343	1	-0.20289\	0.656353
BRPF3	6	0.92359	0.92427	0.999997	1714	0	0.048204	0.63537	0.76477	0.999946	1344	1	0.048204\	0.654331
CDK9	6	0.25192	0.44542	0.999997	826	3	-0.12913	0.6356	0.76499	0.999946	1345	1	-0.12913\	0.653809
HIST1H3J	6	0.0053934	0.022318	0.644802	66	5	-0.40266	0.63737	0.76641	0.999946	1346	1	-0.40266\	0.649797
PHF13	6	0.047342	0.13559	0.926106	280	4	-0.26702	0.63804	0.76694	0.999946	1347	1	-0.26702\	0.648281
NTC_new_173	6	0.32373	0.53238	0.999997	977	1	0.068805	0.63953	0.76831	0.999946	1352	2	0.068805\	0.644916
NTC_new_226	6	0.18034	0.35431	0.999997	670	2	0.027555	0.63953	0.76831	0.999946	1351	2	0.027555\	0.644916
NTC_new_333	6	0.81618	0.84456	0.999997	1547	1	0.091187	0.63953	0.76831	0.999946	1350	2	0.091187\	0.644916
NTC_new_426	6	0.42436	0.60304	0.999997	1097	2	0.029782	0.63953	0.76831	0.999946	1349	2	0.029782\	0.644916
NTC_new_913	6	0.3745	0.5671	0.999997	1039	2	-0.013876	0.63953	0.76831	0.999946	1348	2	-0.013876\	0.644916
HIST1H2AI	6	0.90143	0.90324	0.999997	1663	1	-0.065851	0.64168	0.77011	0.999946	1353	2	-0.065851\	0.640074
HIST3H2A	6	0.0012047	0.0059974	0.394338	26	5	-0.49792	0.64267	0.77093	0.999946	1354	1	-0.49792\	0.63785
UBE2T	6	0.9135	0.91406	0.999997	1697	0	0.068057	0.64323	0.77138	0.999946	1355	2	0.068057\	0.636593
HIST3H2BB	6	0.31557	0.52345	0.999997	963	3	-0.020705	0.64357	0.77163	0.999946	1356	2	-0.020705\	0.635831
FOXP1	6	0.29623	0.49954	0.999997	927	3	-0.14493	0.64408	0.77207	0.999946	1357	2	-0.14493\	0.634688
CTCFL	6	0.09647	0.23914	0.953588	485	2	-0.13671	0.64425	0.77221	0.999946	1358	2	-0.13671\	0.634307
SETDB1	6	0.92353	0.92417	0.999997	1713	0	-0.0066538	0.64528	0.77305	0.999946	1359	2	-0.0066538\	0.632003
DPF3	6	0.0058415	0.023962	0.652698	71	3	-0.13692	0.64551	0.77329	0.999946	1360	1	-0.13692\	0.631489
MTF2	6	0.010994	0.041951	0.717997	113	3	-0.1291	0.64703	0.77456	0.999946	1361	1	-0.1291\	0.628095
NTC_new_302	6	0.03727	0.11251	0.888119	245	4	-0.22536	0.64835	0.77563	0.999946	1366	2	-0.22536\	0.625155
NTC_new_334	6	0.066773	0.17774	0.926543	360	2	-0.055168	0.64835	0.77563	0.999946	1364	2	-0.055168\	0.625155
NTC_new_414	6	0.96422	0.96461	0.999997	1797	0	-0.013294	0.64835	0.77563	0.999946	1363	2	-0.013294\	0.625155
NTC_new_47	6	0.22567	0.41215	0.999997	765	3	-0.0068071	0.64835	0.77563	0.999946	1365	2	-0.0068071\	0.625155
NTC_new_531	6	0.088889	0.22357	0.938947	451	3	-0.13663	0.64835	0.77563	0.999946	1362	2	-0.13663\	0.625155
NTC_new_1019	6	0.024158	0.080639	0.846184	180	4	-0.23991	0.65091	0.77788	0.999946	1367	1	-0.23991\	0.61947
NTC_new_122	6	0.092801	0.2316	0.938947	466	2	-0.10665	0.65091	0.77788	0.999946	1371	1	-0.10665\	0.61947
NTC_new_267	6	0.18574	0.3611	0.999997	684	3	-0.10403	0.65091	0.77788	0.999946	1370	1	-0.10403\	0.61947
NTC_new_421	6	0.030911	0.097507	0.846184	213	4	-0.21319	0.65091	0.77788	0.999946	1368	1	-0.21319\	0.61947
NTC_new_763	6	0.1136	0.26549	0.970216	526	3	-0.11205	0.65091	0.77788	0.999946	1369	1	-0.11205\	0.61947
NTC_new_806	6	0.18574	0.3611	0.999997	680	1	-0.082565	0.65091	0.77788	0.999946	1372	1	-0.082565\	0.61947
PRDM16	6	0.88385	0.88789	0.999997	1641	1	0.04408	0.65175	0.77857	0.999946	1373	2	0.04408\	0.617609
MBTD1	6	0.64903	0.77621	0.999997	1410	2	-0.02787	0.65226	0.77892	0.999946	1374	2	-0.02787\	0.616481
TADA1	6	0.075426	0.19607	0.938947	397	2	0.021979	0.65242	0.77906	0.999946	1375	2	0.021979\	0.616127
PRDM1	6	0.29244	0.49494	0.999997	921	2	-0.073281	0.65327	0.77971	0.999946	1376	2	-0.073281\	0.614249
NASP	6	0.20578	0.38675	0.999997	722	3	-0.076023	0.65344	0.77986	0.999946	1377	2	-0.076023\	0.613873
HIST3H3	6	0.36235	0.55871	0.999997	1024	2	-0.096266	0.65391	0.7802	0.999946	1378	1	-0.096266\	0.612836
SP110	6	0.78018	0.82648	0.999997	1509	1	0.05799	0.65428	0.78052	0.999946	1379	2	0.05799\	0.61202
KDM8	6	0.16083	0.32884	0.999997	624	2	-0.11827	0.65462	0.78078	0.999946	1380	2	-0.11827\	0.61127
JDP2	6	0.30696	0.51299	0.999997	948	3	-0.037991	0.6554	0.78134	0.999946	1381	1	-0.037991\	0.609552
MTA1	6	0.088516	0.22286	0.938947	450	4	-0.25639	0.6571	0.78212	0.999946	1382	1	-0.25639\	0.605815
NTC_new_1018	6	0.32373	0.53238	0.999997	985	1	0.034117	0.66079	0.78328	0.999946	1384	1	0.034117\	0.597736
NTC_new_321	6	0.015532	0.057765	0.749784	148	3	-0.23636	0.66079	0.78328	0.999946	1386	1	-0.23636\	0.597736
NTC_new_726	6	0.092801	0.2316	0.938947	469	2	-0.14129	0.66079	0.78328	0.999946	1383	1	-0.14129\	0.597736
NTC_new_999	6	0.034118	0.10501	0.846184	237	3	-0.16616	0.66079	0.78328	0.999946	1385	1	-0.16616\	0.597736
KAT6B	6	0.08168	0.20888	0.938947	429	2	-0.0034316	0.66299	0.78388	0.999946	1387	1	-0.0034316\	0.592941
SP1	6	0.064448	0.17283	0.926543	351	4	-0.22793	0.66319	0.78395	0.999946	1388	1	-0.22793\	0.592506
NTC_new_1033	6	0.52754	0.6805	0.999997	1228	2	0.062855	0.66817	0.78542	0.999946	1390	1	0.062855\	0.581713
NTC_new_311	6	0.062064	0.16765	0.926543	344	3	-0.10789	0.66817	0.78542	0.999946	1392	1	-0.10789\	0.581713
NTC_new_420	6	0.043429	0.12636	0.908443	268	4	-0.3093	0.66817	0.78542	0.999946	1391	1	-0.3093\	0.581713
NTC_new_516	6	0.030067	0.095357	0.846184	208	4	-0.21835	0.66817	0.78542	0.999946	1393	1	-0.21835\	0.581713
NTC_new_520	6	0.034118	0.10501	0.846184	228	2	-0.1153	0.66817	0.78542	0.999946	1389	1	-0.1153\	0.581713
NTC_new_644	6	0.0013002	0.0065247	0.394338	32	3	-0.14809	0.66817	0.78542	0.999946	1394	1	-0.14809\	0.581713
NTC_new_739	6	0.31117	0.51814	0.999997	958	3	-0.099074	0.66817	0.78542	0.999946	1396	1	-0.099074\	0.581713
NTC_new_808	6	0.03406	0.10487	0.846184	224	4	-0.24949	0.66817	0.78542	0.999946	1395	1	-0.24949\	0.581713
NTC_new_857	6	0.32373	0.53238	0.999997	980	2	-0.062318	0.66817	0.78542	0.999946	1397	1	-0.062318\	0.581713
H2AFB2	6	0.0025803	0.011675	0.490852	45	2	-0.060705	0.67217	0.78659	0.999946	1398	1	-0.060705\	0.573102
H2AFB3	6	0.0025803	0.011675	0.490852	46	2	-0.060705	0.67217	0.78659	0.999946	1399	1	-0.060705\	0.573102
MCM2	14	0.21727	0.50242	0.999997	749	6	-0.074702	0.67355	0.87646	0.999946	1400	3	-0.074702\	0.570143
JADE3	6	0.74351	0.81068	0.999997	1467	1	-0.034811	0.6741	0.78719	0.999946	1401	1	-0.034811\	0.568965
CARM1	6	0.0031288	0.013753	0.521549	51	5	-0.42989	0.67633	0.7879	0.999946	1402	1	-0.42989\	0.564201
CCDC101	6	0.97934	0.97939	0.999997	1832	0	0.091902	0.67693	0.7881	0.999946	1403	1	0.091902\	0.562921
NTC_new_175	6	0.6403	0.76881	0.999997	1392	2	-0.031299	0.68074	0.7894	0.999946	1414	1	-0.031299\	0.554824
NTC_new_176	6	0.63416	0.76372	0.999997	1380	2	-0.059848	0.68074	0.7894	0.999946	1409	1	-0.059848\	0.554824
NTC_new_179	6	0.053312	0.14917	0.926106	296	4	-0.21271	0.68074	0.7894	0.999946	1412	1	-0.21271\	0.554824
NTC_new_225	6	0.56279	0.70761	0.999997	1280	2	0.027268	0.68074	0.7894	0.999946	1408	1	0.027268\	0.554824
NTC_new_277	6	0.27733	0.47709	0.999997	887	3	-0.10726	0.68074	0.7894	0.999946	1415	1	-0.10726\	0.554824
NTC_new_322	6	0.13247	0.29027	0.981453	572	3	-0.073927	0.68074	0.7894	0.999946	1413	1	-0.073927\	0.554824
NTC_new_799	6	0.63593	0.76514	0.999997	1387	1	0.048368	0.68074	0.7894	0.999946	1406	1	0.048368\	0.554824
NTC_new_920	6	0.084092	0.21385	0.938947	435	4	-0.13776	0.68074	0.7894	0.999946	1407	1	-0.13776\	0.554824
NTC_new_925	6	0.39632	0.58295	0.999997	1062	2	-0.0079636	0.68074	0.7894	0.999946	1405	1	-0.0079636\	0.554824
NTC_new_963	6	0.090518	0.22691	0.938947	460	3	-0.17883	0.68074	0.7894	0.999946	1404	1	-0.17883\	0.554824
NTC_new_970	6	0.79578	0.83385	0.999997	1525	1	-0.12408	0.68074	0.7894	0.999946	1411	1	-0.12408\	0.554824
NTC_new_984	6	0.52195	0.6764	0.999997	1223	2	-0.095194	0.68074	0.7894	0.999946	1410	1	-0.095194\	0.554824
NTC_new_1032	6	0.23521	0.42424	0.999997	793	3	-0.13733	0.68737	0.79161	0.999946	1417	1	-0.13733\	0.540841
NTC_new_1039	6	0.066773	0.17774	0.926543	363	1	-0.089414	0.68737	0.79161	0.999946	1416	1	-0.089414\	0.540841
NTC_new_501	6	0.18839	0.36462	0.999997	688	2	-0.083758	0.68737	0.79161	0.999946	1418	1	-0.083758\	0.540841
ACTL6B	6	0.0028258	0.012576	0.497575	48	4	-0.39081	0.68981	0.79242	0.999946	1419	1	-0.39081\	0.535729
NTC_new_1053	6	0.0037823	0.016124	0.577466	54	3	-0.28837	0.69339	0.79359	0.999946	1423	1	-0.28837\	0.528261
NTC_new_530	6	0.13827	0.29818	0.985775	575	1	-0.048038	0.69339	0.79359	0.999946	1424	1	-0.048038\	0.528261
NTC_new_601	6	0.010032	0.038772	0.71227	93	1	-0.048331	0.69339	0.79359	0.999946	1425	1	-0.048331\	0.528261
NTC_new_829	6	0.21674	0.40048	0.999997	746	3	-0.10315	0.69339	0.79359	0.999946	1420	1	-0.10315\	0.528261
NTC_new_906	6	0.26166	0.45748	0.999997	848	3	-0.11159	0.69339	0.79359	0.999946	1421	1	-0.11159\	0.528261
NTC_new_910	6	0.09487	0.23581	0.945483	482	3	-0.11764	0.69339	0.79359	0.999946	1422	1	-0.11764\	0.528261
RPL23A	5	0.2902	0.45803	0.999997	915	1	0.15469	0.69689	0.7507	0.999946	1426	1	0.15469\	0.520997
NTC_new_1083	6	0.23521	0.42424	0.999997	792	3	-0.16552	0.6998	0.79596	0.999946	1427	1	-0.16552\	0.514985
NTC_new_295	6	0.22096	0.40602	0.999997	757	3	-0.093111	0.6998	0.79596	0.999946	1431	1	-0.093111\	0.514985
NTC_new_5	6	0.15187	0.31661	0.999997	611	2	-0.042941	0.6998	0.79596	0.999946	1430	1	-0.042941\	0.514985
NTC_new_730	6	0.073049	0.19121	0.938947	389	4	-0.15951	0.6998	0.79596	0.999946	1428	1	-0.15951\	0.514985
NTC_new_957	6	0.32755	0.53502	0.999997	987	2	0.052584	0.6998	0.79596	0.999946	1429	1	0.052584\	0.514985
PRMT3	6	0.6509	0.77785	0.999997	1417	2	-0.040198	0.706	0.79814	0.999946	1432	1	-0.040198\	0.50226
H2AFJ	6	0.073338	0.19176	0.938947	394	3	-0.18684	0.70712	0.79856	0.999946	1433	1	-0.18684\	0.499973
KDM6A	6	0.82422	0.84909	0.999997	1557	1	-0.026559	0.71301	0.80072	0.999946	1434	1	-0.026559\	0.488006
KDM6B	6	0.090501	0.22688	0.938947	458	4	-0.20256	0.71319	0.80076	0.999946	1435	1	-0.20256\	0.487642
HIST1H4L	6	0.00018971	0.00096501	0.294279	5	3	-0.16028	0.71337	0.80082	0.999946	1436	1	-0.16028\	0.487278
OGT	6	0.060767	0.16488	0.926543	339	4	-0.37131	0.71646	0.80192	0.999946	1437	1	-0.37131\	0.481042
HIST1H2BK	6	0.028169	0.090601	0.846184	201	4	-0.27369	0.72095	0.80357	0.999946	1438	1	-0.27369\	0.472029
NTC_new_152	6	0.029153	0.093089	0.846184	204	4	-0.22893	0.72432	0.80479	0.999946	1439	1	-0.22893\	0.465301
NTC_new_245	6	0.059321	0.16158	0.926543	334	4	-0.23432	0.72432	0.80479	0.999946	1443	1	-0.23432\	0.465301
NTC_new_327	6	0.56279	0.70761	0.999997	1279	2	-0.022223	0.72432	0.80479	0.999946	1444	1	-0.022223\	0.465301
NTC_new_41	6	0.63416	0.76372	0.999997	1384	2	-0.12058	0.72432	0.80479	0.999946	1445	1	-0.12058\	0.465301
NTC_new_625	6	0.026946	0.08778	0.846184	197	4	-0.23665	0.72432	0.80479	0.999946	1440	1	-0.23665\	0.465301
NTC_new_777	6	0.23528	0.4243	0.999997	797	3	-0.10569	0.72432	0.80479	0.999946	1441	1	-0.10569\	0.465301
NTC_new_837	6	0.10007	0.24611	0.960768	493	3	-0.1903	0.72432	0.80479	0.999946	1442	1	-0.1903\	0.465301
TBL1XR1	6	0.082649	0.21072	0.938947	433	4	-0.28032	0.72661	0.80558	0.999946	1446	1	-0.28032\	0.460747
BRCA2	6	0.065419	0.17478	0.926543	354	2	-0.050896	0.72853	0.80631	0.999946	1447	1	-0.050896\	0.45694
USP12	6	0.082725	0.21084	0.938947	434	4	-0.22175	0.7287	0.80639	0.999946	1448	1	-0.22175\	0.456603
MDC1	6	0.24193	0.43258	0.999997	811	2	-0.098747	0.72992	0.80685	0.999946	1449	1	-0.098747\	0.45419
PRMT2	6	0.013621	0.051002	0.723303	135	5	-0.18279	0.73148	0.80743	0.999946	1450	1	-0.18279\	0.45111
NTC_new_123	6	0.088057	0.22196	0.938947	445	3	-0.19121	0.73483	0.80875	0.999946	1451	1	-0.19121\	0.444518
NTC_new_139	6	0.2896	0.49163	0.999997	912	2	-0.030599	0.73483	0.80875	0.999946	1452	1	-0.030599\	0.444518
NTC_new_233	6	0.002347	0.010805	0.490852	41	5	-0.40746	0.73483	0.80875	0.999946	1456	1	-0.40746\	0.444518
NTC_new_293	6	0.58025	0.72096	0.999997	1306	2	-0.0076475	0.73483	0.80875	0.999946	1457	1	-0.0076475\	0.444518
NTC_new_728	6	0.16374	0.33263	0.999997	634	2	-0.075454	0.73483	0.80875	0.999946	1455	1	-0.075454\	0.444518
NTC_new_865	6	0.85649	0.86823	0.999997	1600	1	0.043466	0.73483	0.80875	0.999946	1453	1	0.043466\	0.444518
NTC_new_887	6	0.17985	0.35372	0.999997	666	3	-0.063527	0.73483	0.80875	0.999946	1454	1	-0.063527\	0.444518
SETDB2	6	0.29496	0.49791	0.999997	924	2	0.049186	0.73713	0.80961	0.999946	1458	1	0.049186\	0.440009
NPM2	6	0.57548	0.71733	0.999997	1299	2	-0.0081547	0.73747	0.80972	0.999946	1459	1	-0.0081547\	0.439344
NTC_new_223	6	0.23521	0.42424	0.999997	791	3	-0.098477	0.74117	0.81127	0.999946	1465	1	-0.098477\	0.432124
NTC_new_286	6	0.044877	0.12976	0.919251	273	4	-0.19893	0.74117	0.81127	0.999946	1463	1	-0.19893\	0.432124
NTC_new_341	6	0.09304	0.23207	0.938947	474	4	-0.16347	0.74117	0.81127	0.999946	1462	1	-0.16347\	0.432124
NTC_new_384	6	0.34701	0.54793	0.999997	999	2	-0.0048323	0.74117	0.81127	0.999946	1461	1	-0.0048323\	0.432124
NTC_new_604	6	0.004997	0.020823	0.629254	64	5	-0.32293	0.74117	0.81127	0.999946	1460	1	-0.32293\	0.432124
NTC_new_67	6	0.03406	0.10487	0.846184	226	4	-0.22966	0.74117	0.81127	0.999946	1464	1	-0.22966\	0.432124
NTC_new_870	6	0.030396	0.09614	0.846184	210	4	-0.24918	0.74117	0.81127	0.999946	1466	1	-0.24918\	0.432124
HDGFRP2	6	0.21711	0.40098	0.999997	748	3	-0.14199	0.74368	0.81224	0.999946	1467	1	-0.14199\	0.427246
PHC1	6	0.80242	0.83725	0.999997	1533	1	0.05026	0.74417	0.81245	0.999946	1468	1	0.05026\	0.426296
NTC_new_626	6	0.2979	0.50151	0.999997	931	3	-0.054644	0.74805	0.81405	0.999946	1471	1	-0.054644\	0.418793
NTC_new_697	6	0.26563	0.46239	0.999997	859	1	0.059088	0.74805	0.81405	0.999946	1472	1	0.059088\	0.418793
NTC_new_708	6	0.034118	0.10501	0.846184	239	3	-0.14585	0.74805	0.81405	0.999946	1469	1	-0.14585\	0.418793
NTC_new_961	6	0.071647	0.18818	0.938947	383	2	-0.13406	0.74805	0.81405	0.999946	1470	1	-0.13406\	0.418793
NTC_new_457	6	0.30519	0.5107	0.999997	946	3	-0.12716	0.75859	0.8183	0.999946	1476	1	-0.12716\	0.398608
NTC_new_461	6	0.18839	0.36462	0.999997	689	2	-0.13734	0.75859	0.8183	0.999946	1474	1	-0.13734\	0.398608
NTC_new_813	6	0.0086578	0.034062	0.71227	85	4	-0.30864	0.75859	0.8183	0.999946	1475	1	-0.30864\	0.398608
NTC_new_994	6	0.12194	0.27642	0.970216	543	3	-0.068984	0.75859	0.8183	0.999946	1473	1	-0.068984\	0.398608
TAF5L	6	0.025559	0.084248	0.846184	187	3	-0.12323	0.7611	0.81931	0.999946	1477	1	-0.12323\	0.393842
PRR14	6	0.14954	0.31346	0.999997	598	3	-0.19528	0.76204	0.81971	0.999946	1478	1	-0.19528\	0.392061
NTC_new_132	6	0.94943	0.95025	0.999997	1755	0	0.040537	0.76677	0.82168	0.999946	1479	1	0.040537\	0.383134
NTC_new_532	6	0.050384	0.14248	0.926106	290	3	-0.10845	0.76677	0.82168	0.999946	1482	1	-0.10845\	0.383134
NTC_new_672	6	0.85649	0.86823	0.999997	1601	1	0.039883	0.76677	0.82168	0.999946	1480	1	0.039883\	0.383134
NTC_new_835	6	0.21674	0.40048	0.999997	743	2	-0.048038	0.76677	0.82168	0.999946	1481	1	-0.048038\	0.383134
MAZ	6	0.75236	0.81431	0.999997	1480	1	0.01308	0.7705	0.82324	0.999946	1483	1	0.01308\	0.376133
NTC_new_718	6	0.62003	0.75238	0.999997	1363	2	-0.019426	0.77232	0.82404	0.999946	1485	1	-0.019426\	0.372729
NTC_new_952	6	0.066773	0.17774	0.926543	361	2	-0.10851	0.77232	0.82404	0.999946	1484	1	-0.10851\	0.372729
TFDP1	6	0.41308	0.59489	0.999997	1083	2	-0.029344	0.77412	0.82491	0.999946	1486	1	-0.029344\	0.369371
ZNF687	6	0.16128	0.32945	0.999997	626	2	-0.12924	0.77561	0.82568	0.999946	1487	1	-0.12924\	0.366597
NTC_new_1050	6	0.30519	0.5107	0.999997	944	3	-0.13018	0.77864	0.82698	0.999946	1490	1	-0.13018\	0.360972
NTC_new_392	6	0.015532	0.057765	0.749784	149	4	-0.27908	0.77864	0.82698	0.999946	1488	1	-0.27908\	0.360972
NTC_new_559	6	0.6403	0.76881	0.999997	1394	2	-0.048129	0.77864	0.82698	0.999946	1489	1	-0.048129\	0.360972
HIST1H4A	6	0.00025828	0.0013694	0.294279	9	4	-0.45026	0.78265	0.82884	0.999946	1491	1	-0.45026\	0.353561
TOP2B	6	0.02429	0.080992	0.846184	181	3	-0.14267	0.78724	0.83086	0.999946	1492	1	-0.14267\	0.345125
NTC_new_1027	6	0.26714	0.46426	0.999997	867	3	-0.12437	0.78951	0.83214	0.999946	1497	1	-0.12437\	0.340971
NTC_new_1037	6	0.2979	0.50151	0.999997	934	3	-0.034648	0.78951	0.83214	0.999946	1498	1	-0.034648\	0.340971
NTC_new_170	6	0.0096671	0.037549	0.71227	89	5	-0.23534	0.78951	0.83214	0.999946	1499	1	-0.23534\	0.340971
NTC_new_499	6	0.26714	0.46426	0.999997	872	3	-0.13588	0.78951	0.83214	0.999946	1496	1	-0.13588\	0.340971
NTC_new_552	6	0.20196	0.3818	0.999997	715	3	-0.14904	0.78951	0.83214	0.999946	1493	1	-0.14904\	0.340971
NTC_new_642	6	0.010032	0.038772	0.71227	95	4	-0.23534	0.78951	0.83214	0.999946	1494	1	-0.23534\	0.340971
NTC_new_987	6	0.062045	0.16763	0.926543	342	3	-0.1497	0.78951	0.83214	0.999946	1495	1	-0.1497\	0.340971
PBRM1	6	0.01729	0.063514	0.772557	159	5	-0.17864	0.79134	0.83301	0.999946	1500	1	-0.17864\	0.33763
H1FOO	6	0.90995	0.91096	0.999997	1679	1	0.022448	0.79495	0.83461	0.999946	1501	1	0.022448\	0.331064
SCML4	6	0.42833	0.60569	0.999997	1104	2	0.023643	0.79946	0.83674	0.999946	1502	1	0.023643\	0.322902
CIR1	6	0.91583	0.91639	0.999997	1703	0	0.059634	0.79973	0.83695	0.999946	1503	1	0.059634\	0.322415
UBE2B	6	0.059276	0.16145	0.926543	330	2	-0.11329	0.80041	0.83725	0.999946	1504	1	-0.11329\	0.321189
NTC_new_100	6	0.1429	0.30433	0.987549	593	3	-0.11027	0.80282	0.83863	0.999946	1510	1	-0.11027\	0.316852
NTC_new_205	6	0.059321	0.16158	0.926543	332	3	-0.25057	0.80282	0.83863	0.999946	1509	1	-0.25057\	0.316852
NTC_new_207	6	0.2979	0.50151	0.999997	930	3	-0.066053	0.80282	0.83863	0.999946	1512	1	-0.066053\	0.316852
NTC_new_30	6	0.010032	0.038772	0.71227	101	3	-0.30673	0.80282	0.83863	0.999946	1511	1	-0.30673\	0.316852
NTC_new_431	6	0.026055	0.085507	0.846184	188	4	-0.23042	0.80282	0.83863	0.999946	1506	1	-0.23042\	0.316852
NTC_new_918	6	0.014914	0.055595	0.746665	144	4	-0.28142	0.80282	0.83863	0.999946	1505	1	-0.28142\	0.316852
NTC_new_934	6	0.34225	0.54476	0.999997	995	2	-0.11965	0.80282	0.83863	0.999946	1508	1	-0.11965\	0.316852
NTC_new_988	6	0.056567	0.15581	0.926106	320	3	-0.17048	0.80282	0.83863	0.999946	1507	1	-0.17048\	0.316852
NTC_new_149	6	0.87425	0.88098	0.999997	1629	1	-0.021234	0.80771	0.84107	0.999946	1515	1	-0.021234\	0.308091
NTC_new_483	6	0.6403	0.76881	0.999997	1396	2	-0.041127	0.80771	0.84107	0.999946	1516	1	-0.041127\	0.308091
NTC_new_769	6	0.08237	0.21019	0.938947	432	4	-0.19214	0.80771	0.84107	0.999946	1513	1	-0.19214\	0.308091
NTC_new_971	6	0.35833	0.55577	0.999997	1018	2	-0.028864	0.80771	0.84107	0.999946	1514	1	-0.028864\	0.308091
CSRP2BP	6	0.90381	0.90545	0.999997	1666	1	-0.010674	0.80927	0.84197	0.999946	1517	1	-0.010674\	0.305307
CLOCK	6	0.24938	0.44217	0.999997	823	3	-0.12936	0.8094	0.84203	0.999946	1518	1	-0.12936\	0.305075
SIRT6	6	0.059678	0.16233	0.926543	335	3	-0.14927	0.81109	0.84291	0.999946	1519	1	-0.14927\	0.302066
TADA2A	6	0.0048978	0.020424	0.626984	63	1	0.09232	0.81134	0.84305	0.999946	1520	1	0.09232\	0.301621
PRDM12	6	0.20549	0.38641	0.999997	721	3	-0.12611	0.81211	0.84342	0.999946	1521	1	-0.12611\	0.300253
BRD1	6	0.24501	0.43679	0.999997	813	2	-0.2008	0.81224	0.84349	0.999946	1522	1	-0.2008\	0.300022
TAF9B	6	0.0054876	0.022671	0.644802	68	5	-0.29216	0.81263	0.84363	0.999946	1523	1	-0.29216\	0.299329
NTC_new_189	6	0.27809	0.47793	0.999997	896	2	-0.09712	0.8146	0.84468	0.999946	1530	1	-0.09712\	0.295836
NTC_new_25	6	0.21336	0.39628	0.999997	741	3	-0.14995	0.8146	0.84468	0.999946	1529	1	-0.14995\	0.295836
NTC_new_340	6	0.32373	0.53238	0.999997	975	1	0.0044101	0.8146	0.84468	0.999946	1532	1	0.0044101\	0.295836
NTC_new_364	6	0.02464	0.081954	0.846184	183	3	-0.26863	0.8146	0.84468	0.999946	1531	1	-0.26863\	0.295836
NTC_new_480	6	0.97974	0.97977	0.999997	1834	0	0.027506	0.8146	0.84468	0.999946	1528	1	0.027506\	0.295836
NTC_new_712	6	0.29696	0.50044	0.999997	928	2	0.068138	0.8146	0.84468	0.999946	1525	1	0.068138\	0.295836
NTC_new_794	6	0.76087	0.81774	0.999997	1493	1	0.0035321	0.8146	0.84468	0.999946	1524	1	0.0035321\	0.295836
NTC_new_846	6	0.30159	0.50625	0.999997	939	2	-0.10931	0.8146	0.84468	0.999946	1527	1	-0.10931\	0.295836
NTC_new_962	6	0.055253	0.15307	0.926106	305	1	0.038353	0.8146	0.84468	0.999946	1526	1	0.038353\	0.295836
NTC_new_407	6	0.0027607	0.012351	0.497575	47	3	-0.19669	0.81918	0.84726	0.999946	1535	1	-0.19669\	0.287748
NTC_new_582	6	0.22567	0.41215	0.999997	766	3	-0.11114	0.81918	0.84726	0.999946	1536	1	-0.11114\	0.287748
NTC_new_714	6	0.010969	0.041854	0.717997	111	5	-0.20793	0.81918	0.84726	0.999946	1533	1	-0.20793\	0.287748
NTC_new_902	6	0.63416	0.76372	0.999997	1385	2	-0.073521	0.81918	0.84726	0.999946	1534	1	-0.073521\	0.287748
ATAD2B	6	0.78193	0.82732	0.999997	1512	1	0.047382	0.82165	0.8486	0.999946	1537	1	0.047382\	0.283404
GFI1	6	0.89662	0.89857	0.999997	1657	1	0.048446	0.82324	0.84945	0.999946	1538	1	0.048446\	0.280615
GLYR1	6	0.3514	0.55098	0.999997	1006	1	-0.0067985	0.82397	0.8499	0.999946	1539	1	-0.0067985\	0.279336
TRIM27	6	0.014026	0.052323	0.723303	139	4	-0.30554	0.8241	0.84997	0.999946	1540	1	-0.30554\	0.279109
NTC_new_1009	6	0.051573	0.14527	0.926106	293	3	-0.12027	0.82543	0.8506	0.999946	1543	1	-0.12027\	0.276782
NTC_new_1011	6	0.055253	0.15307	0.926106	312	4	-0.17701	0.82543	0.8506	0.999946	1542	1	-0.17701\	0.276782
NTC_new_1029	6	0.59581	0.73331	0.999997	1327	2	-0.095612	0.82543	0.8506	0.999946	1541	1	-0.095612\	0.276782
NTC_new_538	6	0.32373	0.53238	0.999997	982	1	0.009132	0.82955	0.85283	0.999946	1544	1	0.009132\	0.269599
SETD4	6	0.15291	0.31812	0.999997	613	3	-0.14167	0.83172	0.85409	0.999946	1545	1	-0.14167\	0.26583
H3F3B	6	0.00087692	0.0043746	0.384563	22	5	-0.47795	0.83242	0.85451	0.999946	1546	1	-0.47795\	0.264616
SETD7	6	0.043366	0.12622	0.908443	265	2	-0.095066	0.83254	0.85456	0.999946	1547	1	-0.095066\	0.264409
KMT2E	6	0.05337	0.14927	0.926106	299	3	-0.19822	0.83428	0.85564	0.999946	1548	1	-0.19822\	0.261396
CTBP2	6	0.17546	0.3478	0.999997	660	2	-0.061981	0.8344	0.8557	0.999946	1549	1	-0.061981\	0.261189
RAI1	6	0.015317	0.057028	0.749784	147	4	-0.3778	0.83451	0.85576	0.999946	1550	1	-0.3778\	0.260999
NAP1L1	6	0.55862	0.70438	0.999997	1270	2	-0.087334	0.8352	0.85614	0.999946	1551	1	-0.087334\	0.259806
NTC_new_1004	6	0.54728	0.6957	0.999997	1253	1	0.065155	0.83664	0.85694	0.999946	1556	1	0.065155\	0.257321
NTC_new_477	6	0.12194	0.27642	0.970216	550	2	-0.056772	0.83664	0.85694	0.999946	1555	1	-0.056772\	0.257321
NTC_new_641	6	0.47544	0.64095	0.999997	1170	2	-0.053133	0.83664	0.85694	0.999946	1552	1	-0.053133\	0.257321
NTC_new_724	6	0.0087311	0.034262	0.71227	87	5	-0.29035	0.83664	0.85694	0.999946	1554	1	-0.29035\	0.257321
NTC_new_845	6	0.05695	0.15659	0.926106	324	4	-0.16935	0.83664	0.85694	0.999946	1553	1	-0.16935\	0.257321
NTC_new_1056	6	0.3745	0.5671	0.999997	1040	2	-0.13311	0.83902	0.8583	0.999946	1559	1	-0.13311\	0.253223
NTC_new_1074	6	0.080105	0.20564	0.938947	415	1	0.0068428	0.83902	0.8583	0.999946	1560	1	0.0068428\	0.253223
NTC_new_137	6	0.60316	0.73914	0.999997	1343	1	-0.0055018	0.83902	0.8583	0.999946	1557	1	-0.0055018\	0.253223
NTC_new_363	6	0.56279	0.70761	0.999997	1281	2	-0.043326	0.83902	0.8583	0.999946	1558	1	-0.043326\	0.253223
MBD2	6	0.024796	0.082415	0.846184	185	2	-0.025173	0.84053	0.85918	0.999946	1561	1	-0.025173\	0.250629
PPARGC1A	6	0.99151	0.99148	0.999997	1868	0	0.076432	0.84076	0.85929	0.999946	1562	1	0.076432\	0.250234
PRMT5	6	0.55246	0.69968	0.999997	1262	2	-0.049322	0.84485	0.86165	0.999946	1563	1	-0.049322\	0.243233
PPP4R2	6	0.78753	0.8298	0.999997	1515	1	0.056211	0.84616	0.86253	0.999946	1564	1	0.056211\	0.240998
APOBEC3A	6	0.64485	0.77265	0.999997	1402	1	-0.038721	0.8467	0.86285	0.999946	1565	1	-0.038721\	0.240077
NTC_new_198	6	0.008429	0.033223	0.71227	82	3	-0.12106	0.8481	0.86363	0.999946	1566	1	-0.12106\	0.237694
NTC_new_248	6	0.31117	0.51814	0.999997	957	3	-0.088812	0.8481	0.86363	0.999946	1569	1	-0.088812\	0.237694
NTC_new_455	6	0.010032	0.038772	0.71227	102	1	0.0051824	0.8481	0.86363	0.999946	1567	1	0.0051824\	0.237694
NTC_new_469	6	0.026946	0.08778	0.846184	193	4	-0.27078	0.8481	0.86363	0.999946	1568	1	-0.27078\	0.237694
NTC_new_495	6	0.46218	0.63087	0.999997	1153	2	-0.087309	0.8481	0.86363	0.999946	1572	1	-0.087309\	0.237694
NTC_new_607	6	0.023734	0.079635	0.846184	178	4	-0.31667	0.8481	0.86363	0.999946	1571	1	-0.31667\	0.237694
NTC_new_950	6	0.26267	0.45861	0.999997	853	3	-0.012794	0.8481	0.86363	0.999946	1570	1	-0.012794\	0.237694
PCGF2	6	0.11161	0.26267	0.970136	523	3	-0.22985	0.84992	0.86475	0.999946	1573	1	-0.22985\	0.234601
NCOA2	6	0.35114	0.55083	0.999997	1005	2	-0.052355	0.85087	0.86532	0.999946	1574	1	-0.052355\	0.232989
NTC_new_1006	6	0.22935	0.41679	0.999997	777	2	0.00076917	0.85256	0.86641	0.999946	1577	1	0.00076917\	0.230127
NTC_new_264	6	0.032963	0.10246	0.846184	218	4	-0.21435	0.85256	0.86641	0.999946	1578	1	-0.21435\	0.230127
NTC_new_337	6	0.2997	0.5038	0.999997	937	2	-0.063393	0.85256	0.86641	0.999946	1576	1	-0.063393\	0.230127
NTC_new_34	6	0.3745	0.5671	0.999997	1041	2	-0.070879	0.85256	0.86641	0.999946	1575	1	-0.070879\	0.230127
NTC_new_404	6	0.51543	0.67152	0.999997	1215	2	-0.11099	0.85256	0.86641	0.999946	1581	1	-0.11099\	0.230127
NTC_new_439	6	0.04903	0.13943	0.926106	285	4	-0.20724	0.85256	0.86641	0.999946	1582	1	-0.20724\	0.230127
NTC_new_54	6	0.17266	0.34419	0.999997	652	3	-0.14563	0.85256	0.86641	0.999946	1579	1	-0.14563\	0.230127
NTC_new_662	6	0.0010287	0.0051425	0.394338	23	5	-0.33242	0.85256	0.86641	0.999946	1580	1	-0.33242\	0.230127
HMGA1	6	0.027323	0.088625	0.846184	200	2	-0.013905	0.85402	0.86736	0.999946	1583	1	-0.013905\	0.227658
ATN1	6	0.36298	0.55913	0.999997	1025	2	-0.043203	0.85639	0.86882	0.999946	1584	1	-0.043203\	0.22366
TLE1	6	0.49463	0.65534	0.999997	1190	2	-0.1446	0.8567	0.86903	0.999946	1585	1	-0.1446\	0.223138
NTC_new_411	6	0.089545	0.22487	0.938947	457	4	-0.19118	0.85924	0.87087	0.999946	1586	1	-0.19118\	0.218867
NTC_new_575	6	0.010621	0.040743	0.716337	110	4	-0.29746	0.85924	0.87087	0.999946	1588	1	-0.29746\	0.218867
NTC_new_69	6	0.026055	0.085507	0.846184	190	4	-0.22581	0.85924	0.87087	0.999946	1587	1	-0.22581\	0.218867
PHF21B	6	0.41914	0.59933	0.999997	1088	2	-0.042761	0.86154	0.87231	0.999946	1589	1	-0.042761\	0.21501
H1F0	6	0.031729	0.099509	0.846184	215	4	-0.35636	0.86194	0.87263	0.999946	1590	1	-0.35636\	0.214341
POLR2A	6	0.00025666	0.0013592	0.294279	8	4	-0.78991	0.86243	0.87299	0.999946	1591	1	-0.78991\	0.213521
PKN1	6	0.013016	0.048919	0.723303	130	2	0.042159	0.86253	0.87305	0.999946	1592	1	0.042159\	0.213353
PRKCD	6	0.060378	0.16393	0.926543	337	3	-0.2131	0.86332	0.87354	0.999946	1593	1	-0.2131\	0.212033
SPEN	6	0.25002	0.44291	0.999997	825	3	-0.14746	0.86371	0.87381	0.999946	1594	1	-0.14746\	0.211381
NTC_new_428	6	0.016754	0.061804	0.772557	154	4	-0.2683	0.86508	0.87493	0.999946	1595	1	-0.2683\	0.209095
NTC_new_435	6	0.80014	0.83598	0.999997	1530	1	0.043794	0.86508	0.87493	0.999946	1596	1	0.043794\	0.209095
HDAC3	6	0.020275	0.071168	0.800224	172	4	-0.35429	0.86615	0.87567	0.999946	1597	1	-0.35429\	0.207311
NPM1	6	0.16135	0.3295	0.999997	627	3	-0.19875	0.86663	0.87605	0.999946	1598	1	-0.19875\	0.206512
TLE2	6	0.84659	0.86203	0.999997	1585	1	-0.10089	0.8675	0.87663	0.999946	1599	1	-0.10089\	0.205064
DNTTIP2	6	0.28342	0.48439	0.999997	898	2	-0.05868	0.86826	0.8772	0.999946	1600	1	-0.05868\	0.203801
BANP	6	0.101	0.24791	0.960768	496	4	-0.30987	0.86902	0.87769	0.999946	1601	1	-0.30987\	0.202539
NTC_new_309	6	0.081259	0.20812	0.938947	424	4	-0.16945	0.87072	0.87889	0.999946	1603	1	-0.16945\	0.199719
NTC_new_547	6	0.064443	0.17281	0.926543	350	4	-0.18245	0.87072	0.87889	0.999946	1602	1	-0.18245\	0.199719
NTC_new_621	6	0.14228	0.30356	0.987549	591	2	0.0041238	0.87072	0.87889	0.999946	1605	1	0.0041238\	0.199719
NTC_new_856	6	0.43102	0.6076	0.999997	1109	2	0.023569	0.87072	0.87889	0.999946	1604	1	0.023569\	0.199719
NTC_new_241	6	0.03406	0.10487	0.846184	225	4	-0.28605	0.87398	0.88124	0.999946	1606	1	-0.28605\	0.194328
HP1BP3	6	0.92341	0.92404	0.999997	1712	0	-0.10493	0.87617	0.88283	0.999946	1607	1	-0.10493\	0.190717
NTC_new_1024	6	0.46737	0.63478	0.999997	1162	2	-0.017559	0.87828	0.88423	0.999946	1609	1	-0.017559\	0.187247
NTC_new_1086	6	0.0022498	0.01038	0.490852	40	5	-0.40087	0.87828	0.88423	0.999946	1608	1	-0.40087\	0.187247
NTC_new_437	6	0.09304	0.23207	0.938947	476	4	-0.19346	0.87828	0.88423	0.999946	1610	1	-0.19346\	0.187247
NTC_new_451	6	0.010032	0.038772	0.71227	103	1	-0.019005	0.87828	0.88423	0.999946	1613	1	-0.019005\	0.187247
NTC_new_583	6	0.26714	0.46426	0.999997	871	3	-0.031244	0.87828	0.88423	0.999946	1612	1	-0.031244\	0.187247
NTC_new_610	6	0.24861	0.44121	0.999997	818	2	0.054878	0.87828	0.88423	0.999946	1614	1	0.054878\	0.187247
NTC_new_682	6	0.041131	0.12121	0.908443	253	4	-0.19064	0.87828	0.88423	0.999946	1611	1	-0.19064\	0.187247
JMJD4	6	0.42768	0.60522	0.999997	1101	1	-0.045415	0.87939	0.88505	0.999946	1615	1	-0.045415\	0.185425
KMT2B	6	0.30696	0.51299	0.999997	949	3	-0.12804	0.88124	0.88642	0.999946	1616	1	-0.12804\	0.182393
MAPKAPK3	6	0.017104	0.062977	0.772557	156	5	-0.21722	0.88151	0.88657	0.999946	1617	1	-0.21722\	0.181951
PRDM10	6	0.0044366	0.018596	0.58871	61	3	-0.24237	0.88229	0.88713	0.999946	1618	1	-0.24237\	0.180675
PCGF3	6	0.9529	0.95334	0.999997	1763	0	0.025084	0.88264	0.88736	0.999946	1619	1	0.025084\	0.180103
MECP2	6	0.080169	0.20583	0.938947	422	4	-0.20317	0.88316	0.88778	0.999946	1620	1	-0.20317\	0.179253
TET3	6	0.054887	0.15228	0.926106	302	4	-0.32147	0.88324	0.88782	0.999946	1621	1	-0.32147\	0.179123
HIST1H2BD	6	0.78895	0.83064	0.999997	1519	1	-0.023476	0.88453	0.88878	0.999946	1622	1	-0.023476\	0.177017
TAF6L	6	0.086564	0.21883	0.938947	441	3	-0.14225	0.8847	0.88892	0.999946	1623	1	-0.14225\	0.17674
NTC_new_1036	6	0.13827	0.29818	0.985775	583	3	-0.081004	0.88619	0.89002	0.999946	1626	1	-0.081004\	0.174312
NTC_new_246	6	0.21222	0.39493	0.999997	736	2	-0.0027328	0.88619	0.89002	0.999946	1627	1	-0.0027328\	0.174312
NTC_new_637	6	0.092801	0.2316	0.938947	467	2	-0.066801	0.88619	0.89002	0.999946	1624	1	-0.066801\	0.174312
NTC_new_940	6	0.041548	0.12219	0.908443	255	3	-0.18955	0.88619	0.89002	0.999946	1625	1	-0.18955\	0.174312
SND1	6	0.1577	0.32455	0.999997	620	2	-0.080719	0.88782	0.89147	0.999946	1628	1	-0.080719\	0.171661
TFPT	6	0.019217	0.068542	0.789044	168	1	-0.060344	0.88791	0.89156	0.999946	1629	1	-0.060344\	0.171515
NTC_new_464	6	0.12194	0.27642	0.970216	546	3	-0.17348	0.88878	0.89226	0.999946	1630	1	-0.17348\	0.170102
NTC_new_656	6	0.21336	0.39628	0.999997	739	3	-0.068178	0.88878	0.89226	0.999946	1632	1	-0.068178\	0.170102
NTC_new_863	6	0.12048	0.27451	0.970216	538	3	-0.15573	0.88878	0.89226	0.999946	1631	1	-0.15573\	0.170102
NTC_new_1010	6	0.70141	0.79486	0.999997	1439	1	0.030756	0.8908	0.89404	0.999946	1633	1	0.030756\	0.166827
NTC_new_422	6	0.31117	0.51814	0.999997	959	3	-0.099844	0.8908	0.89404	0.999946	1635	1	-0.099844\	0.166827
NTC_new_809	6	0.56279	0.70761	0.999997	1278	2	-0.048137	0.8908	0.89404	0.999946	1634	1	-0.048137\	0.166827
NOC2L	6	0.58914	0.72817	0.999997	1320	2	-0.033407	0.89185	0.89501	0.999946	1636	1	-0.033407\	0.165127
NTC_new_1040	6	0.068153	0.18074	0.931126	372	3	-0.15232	0.8941	0.8967	0.999946	1641	1	-0.15232\	0.161492
NTC_new_1080	6	0.46737	0.63478	0.999997	1160	2	-0.10161	0.8941	0.8967	0.999946	1640	1	-0.10161\	0.161492
NTC_new_155	6	0.41043	0.59302	0.999997	1078	1	-0.1153	0.8941	0.8967	0.999946	1639	1	-0.1153\	0.161492
NTC_new_436	6	0.12048	0.27451	0.970216	539	3	-0.18205	0.8941	0.8967	0.999946	1645	1	-0.18205\	0.161492
NTC_new_48	6	0.45644	0.62629	0.999997	1147	2	-0.057566	0.8941	0.8967	0.999946	1642	1	-0.057566\	0.161492
NTC_new_485	6	0.068153	0.18074	0.931126	373	3	-0.18448	0.8941	0.8967	0.999946	1644	1	-0.18448\	0.161492
NTC_new_609	6	0.83108	0.85279	0.999997	1565	1	0.019724	0.8941	0.8967	0.999946	1643	1	0.019724\	0.161492
NTC_new_905	6	0.80455	0.83837	0.999997	1537	1	0.056953	0.8941	0.8967	0.999946	1637	1	0.056953\	0.161492
NTC_new_946	6	0.21674	0.40048	0.999997	745	3	-0.14425	0.8941	0.8967	0.999946	1638	1	-0.14425\	0.161492
NTC_new_486	6	0.26166	0.45748	0.999997	847	3	-0.093676	0.89599	0.89821	0.999946	1649	1	-0.093676\	0.158445
NTC_new_732	6	0.068362	0.18121	0.931126	374	3	-0.1285	0.89599	0.89821	0.999946	1648	1	-0.1285\	0.158445
NTC_new_901	6	0.021035	0.073026	0.811682	174	3	-0.15526	0.89599	0.89821	0.999946	1647	1	-0.15526\	0.158445
NTC_new_904	6	0.2979	0.50151	0.999997	929	3	-0.1268	0.89599	0.89821	0.999946	1652	1	-0.1268\	0.158445
NTC_new_936	6	0.22917	0.41651	0.999997	774	2	-0.11057	0.89599	0.89821	0.999946	1650	1	-0.11057\	0.158445
NTC_new_978	6	0.089545	0.22487	0.938947	456	4	-0.16437	0.89599	0.89821	0.999946	1651	1	-0.16437\	0.158445
NTC_new_990	6	0.0042934	0.018166	0.58871	58	5	-0.3083	0.89599	0.89821	0.999946	1646	1	-0.3083\	0.158445
NTC_new_109	6	0.92462	0.92533	0.999997	1717	0	0.038353	0.8989	0.90095	0.999946	1656	1	0.038353\	0.153767
NTC_new_154	6	0.095954	0.23806	0.951262	484	4	-0.16234	0.8989	0.90095	0.999946	1655	1	-0.16234\	0.153767
NTC_new_389	6	0.030396	0.09614	0.846184	209	4	-0.25134	0.8989	0.90095	0.999946	1657	1	-0.25134\	0.153767
NTC_new_394	6	0.041548	0.12219	0.908443	256	4	-0.27547	0.8989	0.90095	0.999946	1659	1	-0.27547\	0.153767
NTC_new_699	6	0.1136	0.26549	0.970216	528	3	-0.047386	0.8989	0.90095	0.999946	1658	1	-0.047386\	0.153767
NTC_new_705	6	0.62003	0.75238	0.999997	1362	2	-0.06367	0.8989	0.90095	0.999946	1653	1	-0.06367\	0.153767
NTC_new_72	6	0.11829	0.27166	0.970216	536	3	-0.13105	0.8989	0.90095	0.999946	1654	1	-0.13105\	0.153767
MTA2	6	0.29606	0.49933	0.999997	926	3	-0.12969	0.9003	0.90234	0.999946	1660	1	-0.12969\	0.151522
NTC_new_195	6	0.0037248	0.015888	0.577466	53	4	-0.30587	0.90351	0.90524	0.999946	1663	1	-0.30587\	0.146388
NTC_new_26	6	0.059839	0.16268	0.926543	336	4	-0.17464	0.90351	0.90524	0.999946	1662	1	-0.17464\	0.146388
NTC_new_335	6	0.18839	0.36462	0.999997	687	3	-0.045861	0.90351	0.90524	0.999946	1665	1	-0.045861\	0.146388
NTC_new_468	6	0.4068	0.59038	0.999997	1072	2	-0.056203	0.90351	0.90524	0.999946	1664	1	-0.056203\	0.146388
NTC_new_567	6	0.080105	0.20564	0.938947	410	2	-0.093642	0.90351	0.90524	0.999946	1661	1	-0.093642\	0.146388
KMT2A	6	0.50881	0.66637	0.999997	1205	2	-0.094491	0.90577	0.90719	0.999946	1666	1	-0.094491\	0.142783
SFMBT2	6	0.68727	0.78983	0.999997	1432	1	0.065355	0.90628	0.90757	0.999946	1667	1	0.065355\	0.141971
NCOA1	6	0.8801	0.88514	0.999997	1636	1	-0.035534	0.90685	0.90807	0.999946	1668	1	-0.035534\	0.141064
H2AFY	6	0.073673	0.19249	0.938947	395	4	-0.16737	0.90692	0.90814	0.999946	1669	1	-0.16737\	0.140953
EYA2	6	0.091685	0.2293	0.938947	463	3	-0.12882	0.90721	0.90841	0.999946	1670	1	-0.12882\	0.140492
NTC_new_1061	6	0.00065879	0.0033404	0.354703	15	4	-0.44027	0.90845	0.90952	0.999946	1675	1	-0.44027\	0.138521
NTC_new_1069	6	0.46218	0.63087	0.999997	1152	2	-0.080739	0.90845	0.90952	0.999946	1674	1	-0.080739\	0.138521
NTC_new_250	6	0.87058	0.8783	0.999997	1620	1	-0.017641	0.90845	0.90952	0.999946	1677	1	-0.017641\	0.138521
NTC_new_280	6	0.30519	0.5107	0.999997	942	3	-0.14508	0.90845	0.90952	0.999946	1676	1	-0.14508\	0.138521
NTC_new_297	6	0.43102	0.6076	0.999997	1108	2	0.058155	0.90845	0.90952	0.999946	1671	1	0.058155\	0.138521
NTC_new_632	6	0.51543	0.67152	0.999997	1213	2	0.085528	0.90845	0.90952	0.999946	1672	1	0.085528\	0.138521
NTC_new_824	6	0.002123	0.0098472	0.490852	38	5	-0.31503	0.90845	0.90952	0.999946	1673	1	-0.31503\	0.138521
SETMAR	6	0.12968	0.28645	0.979157	564	3	-0.095362	0.90939	0.9104	0.999946	1678	1	-0.095362\	0.137029
PCGF1	6	0.97424	0.97422	0.999997	1817	0	0.11132	0.91044	0.91138	0.999946	1679	1	0.11132\	0.135364
RUVBL2	6	0.95422	0.95462	0.999997	1768	0	-0.047774	0.91085	0.91177	0.999946	1680	1	-0.047774\	0.134715
TP53	6	0.5961	0.73354	0.999997	1328	2	0.060888	0.91099	0.9119	0.999946	1681	1	0.060888\	0.134493
NTC_new_1055	6	0.076462	0.19825	0.938947	403	4	-0.18343	0.91202	0.91275	0.999946	1687	1	-0.18343\	0.132863
NTC_new_186	6	0.2997	0.5038	0.999997	936	2	-0.078025	0.91202	0.91275	0.999946	1686	1	-0.078025\	0.132863
NTC_new_342	6	0.16685	0.3369	0.999997	645	3	-0.14815	0.91202	0.91275	0.999946	1689	1	-0.14815\	0.132863
NTC_new_358	6	0.034118	0.10501	0.846184	232	3	-0.17667	0.91202	0.91275	0.999946	1688	1	-0.17667\	0.132863
NTC_new_374	6	0.22567	0.41215	0.999997	767	3	-0.12143	0.91202	0.91275	0.999946	1685	1	-0.12143\	0.132863
NTC_new_466	6	0.53738	0.68814	0.999997	1244	2	-0.028087	0.91202	0.91275	0.999946	1682	1	-0.028087\	0.132863
NTC_new_877	6	0.21974	0.40437	0.999997	754	1	-0.00079646	0.91202	0.91275	0.999946	1683	1	-0.00079646\	0.132863
NTC_new_896	6	0.078456	0.20236	0.938947	406	2	0.047773	0.91202	0.91275	0.999946	1684	1	0.047773\	0.132863
SS18L1	6	0.037962	0.11399	0.892552	247	4	-0.23369	0.9135	0.91406	0.999946	1690	1	-0.23369\	0.130523
TRIM28	6	0.011146	0.042463	0.720384	114	5	-0.2431	0.91371	0.91426	0.999946	1691	1	-0.2431\	0.130192
HDAC6	6	0.068526	0.18151	0.931126	377	4	-0.18222	0.91431	0.91486	0.999946	1692	1	-0.18222\	0.129245
NTC_new_235	6	0.60316	0.73914	0.999997	1338	1	-0.014051	0.9159	0.91644	0.999946	1697	0	-0.014051\	0.126738
NTC_new_282	6	0.15187	0.31661	0.999997	609	2	0.058858	0.9159	0.91644	0.999946	1696	0	0.058858\	0.126738
NTC_new_523	6	0.084797	0.21531	0.938947	438	3	-0.15479	0.9159	0.91644	0.999946	1699	0	-0.15479\	0.126738
NTC_new_679	6	0.14228	0.30356	0.987549	589	2	-0.096173	0.9159	0.91644	0.999946	1698	0	-0.096173\	0.126738
NTC_new_717	6	0.18632	0.36189	0.999997	685	3	-0.056215	0.9159	0.91644	0.999946	1693	0	-0.056215\	0.126738
NTC_new_761	6	0.39632	0.58295	0.999997	1061	1	-0.0054903	0.9159	0.91644	0.999946	1694	0	-0.0054903\	0.126738
NTC_new_766	6	0.16685	0.3369	0.999997	643	3	-0.15329	0.9159	0.91644	0.999946	1695	0	-0.15329\	0.126738
NEK6	6	0.19455	0.37234	0.999997	699	3	-0.13766	0.91733	0.9179	0.999946	1700	0	-0.13766\	0.124487
MBD3	6	0.001669	0.0079889	0.441443	35	4	-0.44762	0.91739	0.91796	0.999946	1701	0	-0.44762\	0.124393
NTC_new_1064	6	0.0025014	0.011388	0.490852	43	5	-0.35058	0.91871	0.91928	0.999946	1708	0	-0.35058\	0.122319
NTC_new_190	6	0.010621	0.040743	0.716337	109	4	-0.37455	0.91871	0.91928	0.999946	1707	0	-0.37455\	0.122319
NTC_new_265	6	0.23521	0.42424	0.999997	790	3	-0.14702	0.91871	0.91928	0.999946	1709	0	-0.14702\	0.122319
NTC_new_273	6	0.15122	0.3157	0.999997	605	3	-0.1496	0.91871	0.91928	0.999946	1711	0	-0.1496\	0.122319
NTC_new_475	6	0.13144	0.28886	0.980085	570	3	-0.074145	0.91871	0.91928	0.999946	1710	0	-0.074145\	0.122319
NTC_new_510	6	0.10817	0.25783	0.960768	515	1	0.028935	0.91871	0.91928	0.999946	1706	0	0.028935\	0.122319
NTC_new_639	6	0.13827	0.29818	0.985775	582	3	-0.11595	0.91871	0.91928	0.999946	1703	0	-0.11595\	0.122319
NTC_new_817	6	0.099125	0.2443	0.960768	490	3	-0.12292	0.91871	0.91928	0.999946	1702	0	-0.12292\	0.122319
NTC_new_88	6	0.12194	0.27642	0.970216	549	3	-0.14978	0.91871	0.91928	0.999946	1705	0	-0.14978\	0.122319
NTC_new_991	6	0.24646	0.43861	0.999997	814	3	-0.033842	0.91871	0.91928	0.999946	1704	0	-0.033842\	0.122319
INO80	6	0.070165	0.18516	0.938947	379	3	-0.18445	0.91995	0.92052	0.999946	1712	0	-0.18445\	0.120373
JMJD8	6	0.22435	0.41036	0.999997	763	2	-0.058583	0.9212	0.92184	0.999946	1713	0	-0.058583\	0.118414
RCC1	6	0.62972	0.75998	0.999997	1378	2	0.049758	0.92157	0.9222	0.999946	1714	0	0.049758\	0.117834
NTC_new_430	6	0.42436	0.60304	0.999997	1095	2	-0.029577	0.92274	0.92338	0.999946	1718	0	-0.029577\	0.116004
NTC_new_493	6	0.25606	0.45043	0.999997	838	3	-0.040251	0.92274	0.92338	0.999946	1719	0	-0.040251\	0.116004
NTC_new_683	6	0.08237	0.21019	0.938947	431	4	-0.16103	0.92274	0.92338	0.999946	1720	0	-0.16103\	0.116004
NTC_new_690	6	0.036742	0.11122	0.881574	244	4	-0.22073	0.92274	0.92338	0.999946	1717	0	-0.22073\	0.116004
NTC_new_912	6	0.0099445	0.03845	0.71227	92	4	-0.34052	0.92274	0.92338	0.999946	1715	0	-0.34052\	0.116004
NTC_new_928	6	0.066773	0.17774	0.926543	371	3	-0.15048	0.92274	0.92338	0.999946	1716	0	-0.15048\	0.116004
NTC_new_121	6	0.19052	0.36751	0.999997	691	3	-0.13221	0.92486	0.92554	0.999946	1726	0	-0.13221\	0.112693
NTC_new_307	6	0.83108	0.85279	0.999997	1564	1	-0.013878	0.92486	0.92554	0.999946	1725	0	-0.013878\	0.112693
NTC_new_324	6	0.042665	0.12471	0.908443	262	3	-0.13662	0.92486	0.92554	0.999946	1727	0	-0.13662\	0.112693
NTC_new_36	6	0.27026	0.46822	0.999997	875	2	-0.10014	0.92486	0.92554	0.999946	1729	0	-0.10014\	0.112693
NTC_new_402	6	0.01433	0.05347	0.728246	142	4	-0.28142	0.92486	0.92554	0.999946	1728	0	-0.28142\	0.112693
NTC_new_481	6	0.95635	0.95658	0.999997	1775	0	0.049869	0.92486	0.92554	0.999946	1722	0	0.049869\	0.112693
NTC_new_65	6	0.53704	0.68791	0.999997	1243	2	-0.10358	0.92486	0.92554	0.999946	1721	0	-0.10358\	0.112693
NTC_new_796	6	0.1429	0.30433	0.987549	594	3	-0.1452	0.92486	0.92554	0.999946	1724	0	-0.1452\	0.112693
NTC_new_871	6	0.81618	0.84456	0.999997	1548	1	0.073678	0.92486	0.92554	0.999946	1723	0	0.073678\	0.112693
SMARCA1	6	0.57522	0.7172	0.999997	1298	2	-0.057665	0.9261	0.92675	0.999946	1730	0	-0.057665\	0.11076
AIRE	6	0.069785	0.18437	0.938947	378	3	-0.1329	0.92634	0.92705	0.999946	1731	0	-0.1329\	0.110386
HIST1H4E	6	0.26693	0.46396	0.999997	866	2	-0.0020516	0.92669	0.92738	0.999946	1732	0	-0.0020516\	0.109841
RPS6KA5	6	0.75139	0.81395	0.999997	1477	1	-0.0036054	0.92727	0.92784	0.999946	1733	0	-0.0036054\	0.108939
APBB1	6	0.25877	0.45398	0.999997	840	3	-0.11992	0.92808	0.92862	0.999946	1734	0	-0.11992\	0.107679
CHD3	6	0.014634	0.05455	0.737762	143	2	-0.12592	0.92872	0.92928	0.999946	1735	0	-0.12592\	0.106684
INO80E	6	0.41497	0.59628	0.999997	1086	2	-0.15132	0.92877	0.92933	0.999946	1736	0	-0.15132\	0.106607
LAS1L	6	0.029612	0.094267	0.846184	206	3	-0.26455	0.92883	0.92941	0.999946	1737	0	-0.26455\	0.106514
KDM5A	6	0.40492	0.5891	0.999997	1071	1	-0.1068	0.9294	0.93004	0.999946	1738	0	-0.1068\	0.105628
NTC_new_305	6	0.0066472	0.026997	0.66965	76	4	-0.2884	0.93067	0.93146	0.999946	1741	0	-0.2884\	0.103658
NTC_new_35	6	0.16374	0.33263	0.999997	636	2	-0.074894	0.93067	0.93146	0.999946	1742	0	-0.074894\	0.103658
NTC_new_563	6	0.051699	0.14556	0.926106	295	4	-0.25254	0.93067	0.93146	0.999946	1740	0	-0.25254\	0.103658
NTC_new_832	6	0.055253	0.15307	0.926106	306	3	-0.15638	0.93067	0.93146	0.999946	1739	0	-0.15638\	0.103658
HIST2H4A	6	0.26662	0.46357	0.999997	865	3	-0.084472	0.93156	0.93231	0.999946	1744	0	-0.084472\	0.102279
HIST2H4B	6	0.26662	0.46357	0.999997	864	3	-0.084472	0.93156	0.93231	0.999946	1743	0	-0.084472\	0.102279
NTC_new_268	6	0.90307	0.9047	0.999997	1665	1	0.030843	0.93241	0.93331	0.999946	1747	0	0.030843\	0.100964
NTC_new_299	6	0.45315	0.62398	0.999997	1138	1	-0.048776	0.93241	0.93331	0.999946	1748	0	-0.048776\	0.100964
NTC_new_474	6	0.073049	0.19121	0.938947	391	4	-0.18373	0.93241	0.93331	0.999946	1749	0	-0.18373\	0.100964
NTC_new_568	6	0.013556	0.050798	0.723303	133	4	-0.3402	0.93241	0.93331	0.999946	1745	0	-0.3402\	0.100964
NTC_new_930	6	0.17985	0.35372	0.999997	664	3	-0.14869	0.93241	0.93331	0.999946	1746	0	-0.14869\	0.100964
SMYD3	6	0.57466	0.71677	0.999997	1297	2	0.0083564	0.93306	0.93387	0.999946	1750	0	0.0083564\	0.0999582
RARA	6	0.86902	0.87719	0.999997	1618	1	0.047987	0.93382	0.93466	0.999946	1751	0	0.047987\	0.0987836
NCOR1	6	0.17797	0.35126	0.999997	663	3	-0.10656	0.93409	0.93499	0.999946	1752	0	-0.10656\	0.0983665
HIST1H4F	6	0.38762	0.57651	0.999997	1053	1	-0.06282	0.93446	0.93547	0.999946	1753	0	-0.06282\	0.0977952
CREBBP	6	0.010531	0.040446	0.716337	108	4	-0.52973	0.93483	0.9358	0.999946	1754	0	-0.52973\	0.0972241
ATXN7L3	6	0.00060866	0.0031049	0.354703	14	5	-0.56327	0.93562	0.93649	0.999946	1755	0	-0.56327\	0.0960054
GADD45G	6	0.0054122	0.022364	0.644802	67	3	-0.16574	0.93589	0.93675	0.999946	1756	0	-0.16574\	0.0955891
NTC_new_140	6	0.45644	0.62629	0.999997	1144	2	-0.10327	0.93734	0.93818	0.999946	1760	0	-0.10327\	0.0933556
NTC_new_164	6	0.10591	0.25468	0.960768	506	3	-0.23226	0.93734	0.93818	0.999946	1761	0	-0.23226\	0.0933556
NTC_new_573	6	0.55528	0.7018	0.999997	1266	2	0.047485	0.93734	0.93818	0.999946	1762	0	0.047485\	0.0933556
NTC_new_693	6	0.0065101	0.026506	0.66965	75	3	-0.15841	0.93734	0.93818	0.999946	1759	0	-0.15841\	0.0933556
NTC_new_97	6	0.84842	0.86308	0.999997	1587	1	-0.060634	0.93734	0.93818	0.999946	1757	0	-0.060634\	0.0933556
NTC_new_986	6	0.013556	0.050798	0.723303	134	4	-0.27897	0.93734	0.93818	0.999946	1758	0	-0.27897\	0.0933556
NTC_new_1063	6	0.010229	0.039407	0.71227	106	4	-0.21938	0.93874	0.93958	0.999946	1765	0	-0.21938\	0.0912025
NTC_new_549	6	0.18034	0.35431	0.999997	669	2	0.032468	0.93874	0.93958	0.999946	1766	0	0.032468\	0.0912025
NTC_new_579	6	0.90876	0.90979	0.999997	1675	1	-0.013294	0.93874	0.93958	0.999946	1767	0	-0.013294\	0.0912025
NTC_new_711	6	0.13827	0.29818	0.985775	578	3	-0.20163	0.93874	0.93958	0.999946	1763	0	-0.20163\	0.0912025
NTC_new_776	6	0.056567	0.15581	0.926106	318	3	-0.1612	0.93874	0.93958	0.999946	1764	0	-0.1612\	0.0912025
PRDM9	6	0.41491	0.59623	0.999997	1085	2	-0.05681	0.94021	0.94105	0.999946	1768	0	-0.05681\	0.0889451
HIST1H2BI	6	0.36177	0.55828	0.999997	1022	2	0.0074997	0.94046	0.94132	0.999946	1769	0	0.0074997\	0.0885615
JADE2	6	0.0022129	0.010231	0.490852	39	5	-0.47973	0.94056	0.94145	0.999946	1770	0	-0.47973\	0.0884081
NTC_new_274	6	0.93158	0.93235	0.999997	1732	0	0.030168	0.94175	0.94262	0.999946	1773	0	0.030168\	0.086584
NTC_new_281	6	0.066773	0.17774	0.926543	367	3	-0.19097	0.94175	0.94262	0.999946	1774	0	-0.19097\	0.086584
NTC_new_484	6	0.59581	0.73331	0.999997	1325	2	0.054874	0.94175	0.94262	0.999946	1775	0	0.054874\	0.086584
NTC_new_556	6	0.066563	0.17725	0.926543	356	4	-0.19864	0.94175	0.94262	0.999946	1771	0	-0.19864\	0.086584
NTC_new_945	6	0.63593	0.76514	0.999997	1388	1	0.052715	0.94175	0.94262	0.999946	1772	0	0.052715\	0.086584
NTC_new_1048	6	0.32373	0.53238	0.999997	983	1	0.032058	0.94342	0.94426	0.999946	1779	0	0.032058\	0.0840279
NTC_new_303	6	0.23004	0.41773	0.999997	786	3	-0.057442	0.94342	0.94426	0.999946	1780	0	-0.057442\	0.0840279
NTC_new_397	6	0.06513	0.17419	0.926543	352	4	-0.22397	0.94342	0.94426	0.999946	1781	0	-0.22397\	0.0840279
NTC_new_677	6	0.22567	0.41215	0.999997	764	3	-0.044101	0.94342	0.94426	0.999946	1778	0	-0.044101\	0.0840279
NTC_new_858	6	0.012018	0.045351	0.723303	118	5	-0.20452	0.94342	0.94426	0.999946	1776	0	-0.20452\	0.0840279
NTC_new_951	6	0.022652	0.076922	0.840493	177	4	-0.26534	0.94342	0.94426	0.999946	1777	0	-0.26534\	0.0840279
MGA	6	0.0010824	0.0053677	0.394338	24	4	-0.6002	0.94471	0.94552	0.999946	1782	0	-0.6002\	0.0820566
CUL2	6	0.91982	0.92043	0.999997	1708	0	0.011796	0.94631	0.94711	0.999946	1783	0	0.011796\	0.0796152
ING4	6	0.037507	0.11301	0.888453	246	4	-0.28116	0.94635	0.94718	0.999946	1784	0	-0.28116\	0.0795542
NTC_new_336	6	0.058101	0.15899	0.926543	328	4	-0.16756	0.94702	0.94776	0.999946	1786	0	-0.16756\	0.0785332
NTC_new_545	6	0.04903	0.13943	0.926106	284	4	-0.20724	0.94702	0.94776	0.999946	1785	0	-0.20724\	0.0785332
NTC_new_1005	6	0.31012	0.51697	0.999997	950	2	-0.050582	0.94826	0.94899	0.999946	1789	0	-0.050582\	0.0766454
NTC_new_450	6	0.20196	0.3818	0.999997	714	3	-0.11624	0.94826	0.94899	0.999946	1790	0	-0.11624\	0.0766454
NTC_new_716	6	0.026946	0.08778	0.846184	195	2	-0.050163	0.94826	0.94899	0.999946	1788	0	-0.050163\	0.0766454
NTC_new_754	6	0.10817	0.25783	0.960768	516	2	0.0064243	0.94826	0.94899	0.999946	1787	0	0.0064243\	0.0766454
NTC_new_874	6	0.018533	0.06698	0.780359	164	2	-0.097944	0.94963	0.95043	0.999946	1791	0	-0.097944\	0.0745626
H2AFB1	6	0.11764	0.27086	0.970216	534	3	-0.17895	0.95067	0.95144	0.999946	1792	0	-0.17895\	0.0729835
NTC_new_19	6	0.21336	0.39628	0.999997	742	3	-0.18505	0.95113	0.95186	0.999946	1796	0	-0.18505\	0.0722856
NTC_new_24	6	0.54887	0.69689	0.999997	1259	2	-0.10754	0.95113	0.95186	0.999946	1797	0	-0.10754\	0.0722856
NTC_new_489	6	0.088057	0.22196	0.938947	448	3	-0.16754	0.95113	0.95186	0.999946	1798	0	-0.16754\	0.0722856
NTC_new_544	6	0.030911	0.097507	0.846184	212	4	-0.26082	0.95113	0.95186	0.999946	1795	0	-0.26082\	0.0722856
NTC_new_756	6	0.092801	0.2316	0.938947	472	2	-0.12169	0.95113	0.95186	0.999946	1793	0	-0.12169\	0.0722856
NTC_new_955	6	0.016087	0.059583	0.761432	151	5	-0.22825	0.95113	0.95186	0.999946	1794	0	-0.22825\	0.0722856
HMGN2	6	0.033363	0.10343	0.846184	222	4	-0.49018	0.95179	0.9524	0.999946	1799	0	-0.49018\	0.0712848
NTC_new_1085	6	0.078266	0.20194	0.938947	405	4	-0.205	0.95354	0.95394	0.999946	1801	0	-0.205\	0.0686346
NTC_new_193	6	0.45315	0.62398	0.999997	1141	2	0.027387	0.95354	0.95394	0.999946	1802	0	0.027387\	0.0686346
NTC_new_651	6	0.0013002	0.0065247	0.394338	30	4	-0.15433	0.95354	0.95394	0.999946	1800	0	-0.15433\	0.0686346
NTC_new_116	6	0.81618	0.84456	0.999997	1549	1	-0.048764	0.95473	0.95505	0.999946	1806	0	-0.048764\	0.0668353
NTC_new_423	6	0.044877	0.12976	0.919251	272	4	-0.24182	0.95473	0.95505	0.999946	1807	0	-0.24182\	0.0668353
NTC_new_630	6	0.092801	0.2316	0.938947	473	3	-0.1556	0.95473	0.95505	0.999946	1808	0	-0.1556\	0.0668353
NTC_new_692	6	0.60011	0.73668	0.999997	1334	2	-0.017547	0.95473	0.95505	0.999946	1805	0	-0.017547\	0.0668353
NTC_new_929	6	0.012139	0.045745	0.723303	120	4	-0.3	0.95473	0.95505	0.999946	1803	0	-0.3\	0.0668353
NTC_new_959	6	0.00070689	0.0035708	0.354703	17	4	-0.3988	0.95473	0.95505	0.999946	1804	0	-0.3988\	0.0668353
CBX6	6	0.041373	0.12181	0.908443	254	3	-0.13817	0.95597	0.95625	0.999946	1809	0	-0.13817\	0.0649628
NTC_new_502	6	0.27809	0.47793	0.999997	895	2	-0.056151	0.95665	0.95689	0.999946	1811	0	-0.056151\	0.0639369
NTC_new_6	6	0.54338	0.69259	0.999997	1251	2	-0.0661	0.95665	0.95689	0.999946	1812	0	-0.0661\	0.0639369
NTC_new_854	6	0.17575	0.34824	0.999997	661	3	-0.16172	0.95665	0.95689	0.999946	1810	0	-0.16172\	0.0639369
NCOA3	6	0.098459	0.24308	0.960768	488	4	-0.1902	0.95737	0.95762	0.999946	1813	0	-0.1902\	0.0628515
NTC_new_1092	6	0.078456	0.20236	0.938947	407	2	-0.1224	0.95794	0.95825	0.999946	1816	0	-0.1224\	0.0619928
NTC_new_161	6	0.086636	0.21895	0.938947	443	4	-0.14217	0.95794	0.95825	0.999946	1817	0	-0.14217\	0.0619928
NTC_new_243	6	0.09304	0.23207	0.938947	478	4	-0.16347	0.95794	0.95825	0.999946	1815	0	-0.16347\	0.0619928
NTC_new_603	6	0.12538	0.28079	0.973198	558	2	-0.069723	0.95794	0.95825	0.999946	1814	0	-0.069723\	0.0619928
NTC_new_204	6	0.60011	0.73668	0.999997	1336	2	-0.10665	0.95896	0.95926	0.999946	1819	0	-0.10665\	0.0604575
NTC_new_570	6	0.28627	0.48778	0.999997	903	3	-0.13237	0.95896	0.95926	0.999946	1818	0	-0.13237\	0.0604575
HIST2H3D	6	0.0057033	0.023516	0.650707	69	5	-0.54546	0.95984	0.9602	0.999946	1820	0	-0.54546\	0.0591342
NTC_new_1031	6	0.44006	0.61437	0.999997	1126	1	-0.04291	0.96026	0.96057	0.999946	1821	0	-0.04291\	0.058503
NTC_new_405	6	0.09487	0.23581	0.945483	481	3	-0.14678	0.96099	0.96123	0.999946	1822	0	-0.14678\	0.0574067
NTC_new_10	6	0.015249	0.056762	0.749784	146	5	-0.29106	0.96259	0.96287	0.999946	1826	0	-0.29106\	0.0550067
NTC_new_1012	6	0.0062441	0.025549	0.667715	74	4	-0.34974	0.96259	0.96287	0.999946	1827	0	-0.34974\	0.0550067
NTC_new_196	6	0.29173	0.49402	0.999997	917	3	-0.12612	0.96259	0.96287	0.999946	1828	0	-0.12612\	0.0550067
NTC_new_362	6	0.57001	0.713	0.999997	1290	1	-0.041897	0.96259	0.96287	0.999946	1825	0	-0.041897\	0.0550067
NTC_new_721	6	0.10591	0.25468	0.960768	503	3	-0.14915	0.96259	0.96287	0.999946	1823	0	-0.14915\	0.0550067
NTC_new_975	6	0.13247	0.29027	0.981453	571	3	-0.15839	0.96259	0.96287	0.999946	1824	0	-0.15839\	0.0550067
USP22	6	0.013342	0.050158	0.723303	131	4	-0.27506	0.96319	0.96347	0.999946	1829	0	-0.27506\	0.0541077
NTC_new_287	6	0.20058	0.38002	0.999997	709	3	-0.12735	0.9636	0.96389	0.999946	1830	0	-0.12735\	0.0534937
NTC_new_211	6	0.43787	0.6128	0.999997	1121	2	-0.11376	0.96442	0.96482	0.999946	1833	0	-0.11376\	0.0522665
NTC_new_624	6	0.11438	0.26653	0.970216	529	3	-0.17255	0.96442	0.96482	0.999946	1834	0	-0.17255\	0.0522665
NTC_new_700	6	0.31012	0.51697	0.999997	954	2	-0.10693	0.96442	0.96482	0.999946	1832	0	-0.10693\	0.0522665
NTC_new_81	6	0.075451	0.19613	0.938947	399	4	-0.18435	0.96442	0.96482	0.999946	1831	0	-0.18435\	0.0522665
NTC_new_1025	6	0.0043494	0.018376	0.58871	60	4	-0.35752	0.96541	0.96576	0.999946	1837	0	-0.35752\	0.0507863
NTC_new_184	6	0.10817	0.25783	0.960768	509	2	-0.049115	0.96541	0.96576	0.999946	1838	0	-0.049115\	0.0507863
NTC_new_441	6	0.0092768	0.036182	0.71227	88	4	-0.34222	0.96541	0.96576	0.999946	1839	0	-0.34222\	0.0507863
NTC_new_55	6	0.10817	0.25783	0.960768	512	2	-0.11396	0.96541	0.96576	0.999946	1835	0	-0.11396\	0.0507863
NTC_new_688	6	0.26714	0.46426	0.999997	873	3	-0.1236	0.96541	0.96576	0.999946	1836	0	-0.1236\	0.0507863
NTC_new_112	6	0.81192	0.84229	0.999997	1544	1	-0.067876	0.96629	0.96659	0.999946	1840	0	-0.067876\	0.0494719
NTC_new_1057	6	0.010032	0.038772	0.71227	100	4	-0.24817	0.96715	0.96746	0.999946	1843	0	-0.24817\	0.0481884
NTC_new_269	6	0.16685	0.3369	0.999997	642	3	-0.13593	0.96715	0.96746	0.999946	1842	0	-0.13593\	0.0481884
NTC_new_886	6	0.45315	0.62398	0.999997	1142	2	-0.053542	0.96715	0.96746	0.999946	1841	0	-0.053542\	0.0481884
NTC_new_3	6	0.26166	0.45748	0.999997	842	3	-0.071236	0.96828	0.96849	0.999946	1846	0	-0.071236\	0.0465038
NTC_new_528	6	0.16374	0.33263	0.999997	635	3	-0.13945	0.96828	0.96849	0.999946	1847	0	-0.13945\	0.0465038
NTC_new_612	6	0.41919	0.59937	0.999997	1092	1	0.029731	0.96828	0.96849	0.999946	1844	0	0.029731\	0.0465038
NTC_new_916	6	0.10817	0.25783	0.960768	511	3	-0.15568	0.96828	0.96849	0.999946	1845	0	-0.15568\	0.0465038
MLLT6	6	0.048334	0.13796	0.926106	283	4	-0.27707	0.96897	0.96922	0.999946	1848	0	-0.27707\	0.0454761
HIST1H2BL	6	0.054423	0.15132	0.926106	301	3	-0.26519	0.96903	0.96928	0.999946	1849	0	-0.26519\	0.0453868
RCOR1	6	0.24398	0.4354	0.999997	812	2	-0.094433	0.96908	0.96933	0.999946	1850	0	-0.094433\	0.0453123
MSH6	6	0.5823	0.7227	0.999997	1314	2	-0.072488	0.96979	0.96999	0.999946	1851	0	-0.072488\	0.0442557
DIDO1	6	0.017923	0.065444	0.780359	161	4	-0.60081	0.9704	0.97062	0.999946	1852	0	-0.60081\	0.0433485
HIST1H2BE	6	0.019726	0.069852	0.798107	169	2	-0.061124	0.97065	0.97085	0.999946	1853	0	-0.061124\	0.0429769
BAP1	6	0.013012	0.048893	0.723303	129	3	-0.33066	0.97191	0.97204	0.999946	1854	0	-0.33066\	0.0411054
MYBBP1A	6	0.2497	0.44248	0.999997	824	3	-0.12084	0.97214	0.97228	0.999946	1855	0	-0.12084\	0.040764
NTC_new_194	6	0.15023	0.3144	0.999997	602	3	-0.15096	0.9734	0.9734	0.999946	1856	0	-0.15096\	0.0388953
NTC_new_177	6	0.012018	0.045351	0.723303	119	5	-0.20646	0.97428	0.97428	0.999946	1858	0	-0.20646\	0.0375916
NTC_new_43	6	0.58051	0.72119	0.999997	1312	2	-0.093197	0.97428	0.97428	0.999946	1857	0	-0.093197\	0.0375916
NTC_new_113	6	0.09304	0.23207	0.938947	477	4	-0.21411	0.97632	0.97639	0.999946	1861	0	-0.21411\	0.034574
NTC_new_180	6	0.13827	0.29818	0.985775	584	2	-0.078025	0.97632	0.97639	0.999946	1860	0	-0.078025\	0.034574
NTC_new_284	6	0.022562	0.076717	0.840493	176	4	-0.31498	0.97632	0.97639	0.999946	1859	0	-0.31498\	0.034574
TDRD3	6	0.090921	0.22764	0.938947	462	3	-0.21524	0.97693	0.97705	0.999946	1862	0	-0.21524\	0.0336729
KDM4B	6	0.046515	0.13366	0.926106	277	3	-0.23218	0.97716	0.97723	0.999946	1863	0	-0.23218\	0.0333333
HIST1H2AK	6	0.068391	0.18125	0.931126	376	4	-0.24008	0.97744	0.97746	0.999946	1864	0	-0.24008\	0.0329199
EYA3	6	0.57597	0.71768	0.999997	1301	2	-0.10663	0.97753	0.97754	0.999946	1865	0	-0.10663\	0.0327871
NTC_new_13	6	0.47544	0.64095	0.999997	1172	2	-0.11897	0.97791	0.97791	0.999946	1868	0	-0.11897\	0.0322264
NTC_new_496	6	0.26714	0.46426	0.999997	869	3	-0.13863	0.97791	0.97791	0.999946	1867	0	-0.13863\	0.0322264
NTC_new_879	6	0.039725	0.11789	0.908443	250	4	-0.26742	0.97791	0.97791	0.999946	1866	0	-0.26742\	0.0322264
PELP1	6	0.018709	0.06742	0.780785	167	4	-0.45455	0.97831	0.97828	0.999946	1869	0	-0.45455\	0.0316364
DDB1	6	0.14001	0.3006	0.987549	588	3	-0.20987	0.97953	0.97957	0.999946	1870	0	-0.20987\	0.0298384
NTC_new_408	6	0.075451	0.19613	0.938947	400	4	-0.17265	0.97996	0.98003	0.999946	1871	0	-0.17265\	0.0292052
NTC_new_258	6	0.015968	0.059234	0.761432	150	4	-0.26179	0.98064	0.98068	0.999946	1874	0	-0.26179\	0.0282045
NTC_new_631	6	0.0052673	0.021842	0.644802	65	5	-0.25864	0.98064	0.98068	0.999946	1875	0	-0.25864\	0.0282045
NTC_new_695	6	0.053312	0.14917	0.926106	298	4	-0.23596	0.98064	0.98068	0.999946	1872	0	-0.23596\	0.0282045
NTC_new_895	6	0.026946	0.08778	0.846184	194	4	-0.24879	0.98064	0.98068	0.999946	1873	0	-0.24879\	0.0282045
CBX4	6	0.10075	0.24745	0.960768	495	4	-0.15604	0.98184	0.98171	0.999946	1876	0	-0.15604\	0.0264402
SIRT3	6	0.0068414	0.027765	0.679722	79	5	-0.31923	0.98195	0.98183	0.999946	1877	0	-0.31923\	0.0262785
UBR5	6	0.0069471	0.028149	0.680507	80	4	-0.38183	0.98299	0.98295	0.999946	1878	0	-0.38183\	0.0247514
APOBEC3B	6	0.017691	0.064738	0.780359	160	2	-0.10335	0.98315	0.98315	0.999946	1879	0	-0.10335\	0.0245165
NTC_new_427	6	0.088057	0.22196	0.938947	449	3	-0.20446	0.98353	0.98353	0.999946	1880	0	-0.20446\	0.023959
NTC_new_1017	6	0.20196	0.3818	0.999997	713	3	-0.17761	0.98405	0.98398	0.999946	1882	0	-0.17761\	0.0231965
NTC_new_497	6	0.088889	0.22357	0.938947	452	2	-0.098925	0.98405	0.98398	0.999946	1881	0	-0.098925\	0.0231965
NTC_new_44	6	0.12194	0.27642	0.970216	544	3	-0.14904	0.98447	0.9844	0.999946	1884	0	-0.14904\	0.0225809
NTC_new_500	6	0.055253	0.15307	0.926106	314	2	-0.11502	0.98447	0.9844	0.999946	1883	0	-0.11502\	0.0225809
HSPA1B	6	0.19196	0.36932	0.999997	693	3	-0.20449	0.98472	0.98467	0.999946	1885	0	-0.20449\	0.0222145
NTC_new_634	6	0.089545	0.22487	0.938947	455	4	-0.14358	0.98517	0.98515	0.999946	1886	0	-0.14358\	0.0215554
NTC_new_200	6	0.24136	0.43192	0.999997	804	3	-0.11768	0.98565	0.98556	0.999946	1889	0	-0.11768\	0.0208527
NTC_new_649	6	0.026055	0.085507	0.846184	189	4	-0.27477	0.98565	0.98556	0.999946	1888	0	-0.27477\	0.0208527
NTC_new_924	6	0.23528	0.4243	0.999997	798	2	-0.13671	0.98565	0.98556	0.999946	1887	0	-0.13671\	0.0208527
H3F3C	6	0.027244	0.088415	0.846184	198	4	-0.31663	0.98612	0.98607	0.999946	1890	0	-0.31663\	0.0201649
NTC_new_118	6	0.070627	0.18612	0.938947	380	4	-0.18465	0.9865	0.98646	0.999946	1892	0	-0.18465\	0.019609
NTC_new_786	6	0.31117	0.51814	0.999997	961	3	-0.11973	0.9865	0.98646	0.999946	1891	0	-0.11973\	0.019609
ANP32A	6	0.012991	0.048827	0.723303	127	5	-0.24197	0.98839	0.98843	0.999946	1893	0	-0.24197\	0.0168477
ASF1B	6	0.034809	0.10667	0.856025	241	4	-0.21622	0.98858	0.98863	0.999946	1894	0	-0.21622\	0.0165704
KEAP1	6	0.0060983	0.02495	0.667715	72	5	-0.49749	0.98864	0.98868	0.999946	1895	0	-0.49749\	0.0164828
KAT7	6	0.0029564	0.013083	0.50604	50	4	-0.53121	0.98889	0.98888	0.999946	1896	0	-0.53121\	0.016118
NTC_new_494	6	0.031714	0.099478	0.846184	214	4	-0.23589	0.99025	0.99026	0.999946	1899	0	-0.23589\	0.0141353
NTC_new_535	6	0.016663	0.061533	0.772557	153	4	-0.30217	0.99025	0.99026	0.999946	1898	0	-0.30217\	0.0141353
NTC_new_571	6	0.24136	0.43192	0.999997	805	3	-0.13607	0.99025	0.99026	0.999946	1897	0	-0.13607\	0.0141353
ZBTB7C	6	0.012958	0.04875	0.723303	126	5	-0.26233	0.99049	0.99053	0.999946	1900	0	-0.26233\	0.0137857
KAT6A	6	0.012668	0.047736	0.723303	125	4	-0.33718	0.99057	0.99062	0.999946	1901	0	-0.33718\	0.0136692
NTC_new_68	6	0.0028336	0.012607	0.497575	49	5	-0.36358	0.99078	0.99086	0.999946	1902	0	-0.36358\	0.0133633
HIST2H2AA3	6	0.062937	0.16952	0.926543	347	4	-0.23787	0.9912	0.99119	0.999946	1904	0	-0.23787\	0.0127519
HIST2H2AA4	6	0.062937	0.16952	0.926543	346	4	-0.23787	0.9912	0.99119	0.999946	1903	0	-0.23787\	0.0127519
NTC_new_1060	6	0.081259	0.20812	0.938947	427	4	-0.14078	0.99147	0.99144	0.999946	1905	0	-0.14078\	0.012359
NTC_new_236	6	0.0014772	0.0072568	0.425293	33	5	-0.40912	0.99227	0.99232	0.999946	1906	0	-0.40912\	0.0111954
NTC_new_376	6	0.086636	0.21895	0.938947	442	4	-0.23613	0.99298	0.99294	0.999946	1907	0	-0.23613\	0.0101634
CHD4	6	0.071935	0.18876	0.938947	385	4	-0.33974	0.99309	0.99304	0.999946	1908	0	-0.33974\	0.0100036
NTC_new_105	6	0.078266	0.20194	0.938947	404	4	-0.15435	0.99329	0.99322	0.999946	1909	0	-0.15435\	0.00971311
NTC_new_328	6	0.011683	0.044163	0.723303	116	4	-0.36204	0.99349	0.9934	0.999946	1911	0	-0.36204\	0.00942265
NTC_new_348	6	0.18632	0.36189	0.999997	686	3	-0.15034	0.99349	0.9934	0.999946	1910	0	-0.15034\	0.00942265
NTC_new_578	6	0.0066494	0.027008	0.66965	78	5	-0.25984	0.99372	0.99363	0.999946	1912	0	-0.25984\	0.00908869
NTC_new_592	6	0.066563	0.17725	0.926543	357	4	-0.18142	0.99438	0.99426	0.999946	1913	0	-0.18142\	0.00813082
TADA2B	6	0.042766	0.12492	0.908443	263	4	-0.3335	0.99451	0.99438	0.999946	1914	0	-0.3335\	0.00794222
NTC_new_17	6	0.00012936	0.00062201	0.294279	4	4	-0.38356	0.99518	0.99523	0.999946	1916	0	-0.38356\	0.0069706
NTC_new_674	6	0.0066494	0.027008	0.66965	77	5	-0.25408	0.99518	0.99523	0.999946	1915	0	-0.25408\	0.0069706
NTC_new_444	6	0.013971	0.052093	0.723303	137	5	-0.2379	0.99548	0.99555	0.999946	1917	0	-0.2379\	0.00653576
NTC_new_843	6	0.0039439	0.016774	0.58871	55	5	-0.44055	0.99638	0.99645	0.999946	1918	0	-0.44055\	0.00523203
NTC_new_443	6	0.03278	0.10198	0.846184	216	4	-0.24078	0.99677	0.99676	0.999946	1919	0	-0.24078\	0.00466745
NTC_new_687	6	0.013009	0.048888	0.723303	128	4	-0.24196	0.99722	0.9972	0.999946	1921	0	-0.24196\	0.00401628
NTC_new_750	6	0.034118	0.10501	0.846184	240	4	-0.24967	0.99722	0.9972	0.999946	1920	0	-0.24967\	0.00401628
NTC_new_165	6	0.10591	0.25468	0.960768	505	3	-0.15271	0.99764	0.99764	0.999946	1922	0	-0.15271\	0.00340878
HIST1H4D	6	0.011722	0.044332	0.723303	117	5	-0.23681	0.9982	0.99819	0.999946	1923	0	-0.23681\	0.00259919
NTC_new_504	6	0.0012803	0.0063916	0.394338	28	5	-0.42107	0.99832	0.99831	0.999946	1924	0	-0.42107\	0.00242577
FXR2	6	0.0012376	0.0061766	0.394338	27	6	-0.34567	0.99876	0.99879	0.999946	1925	0	-0.34567\	0.00179005
NTC_new_1034	6	0.0012	0.0059923	0.394338	25	6	-0.24098	0.9988	0.99882	0.999946	1926	0	-0.24098\	0.00173227
KDM5C	6	0.00071939	0.0036527	0.354703	19	6	-0.36775	0.99928	0.99931	0.999946	1927	0	-0.36775\	0.00103911
SETD1B	6	4.9022e-05	0.00025853	0.249175	2	6	-0.49223	0.9993	0.99933	0.999946	1928	0	-0.49223\	0.00101024
NTC_new_415	6	0.00058008	0.002977	0.354703	13	6	-0.25296	0.99942	0.99945	0.999946	1929	0	-0.25296\	0.000837006
SETD6	6	0.00047095	0.0023985	0.354703	11	6	-0.34422	0.99953	0.99957	0.999946	1930	0	-0.34422\	0.000678226
JADE1	6	0.00035025	0.001779	0.344059	10	6	-0.41645	0.99965	0.9997	0.999946	1931	0	-0.41645\	0.000505032
RBX1	6	0.00024718	0.0013234	0.294279	7	6	-0.38842	0.99975	0.99979	0.999946	1932	0	-0.38842\	0.000360719
L3MBTL2	6	0.00021494	0.0011084	0.294279	6	6	-0.73966	0.99979	0.99983	0.999946	1933	0	-0.73966\	0.000302998
H2AFX	6	8.4625e-05	0.00038652	0.249175	3	6	-0.48241	0.99992	0.99995	0.999946	1934	0	-0.48241\	0.00011542
